# Supplementary material for: Need for recovery amongst emergency physicians in the UK and Ireland: a cross-sectional survey
Source: PubMed Central journal article supplement — BMJ Open. 2020 Nov 2;10(11):e041485. doi: 10.1136/bmjopen-2020-041485 (PMC7607596; doi:10.1136/bmjopen-2020-041485), 2020-11-02
Supplement: bmjopen-2020-041485.draft_revisions.pdf [file bmjopen-2020-041485.draft_revisions.pdf]

# BMJ Open

BMJ Open is committed to open peer review. As part of this commitment we make the peer review history of every article we publish publicly available.

When an article is published we post the peer reviewers' comments and the authors' responses online. We also post the versions of the paper that were used during peer review. These are the versions that the peer review comments apply to.

The versions of the paper that follow are the versions that were submitted during the peer review process. They are not the versions of record or the final published versions. They should not be cited or distributed as the published version of this manuscript.

BMJ Open is an open access journal and the full, final, typeset and author-corrected version of record of the manuscript is available on our site with no access controls, subscription charges or pay-per-view fees (<http://bmjopen.bmj.com>).

If you have any questions on BMJ Open's open peer review process please email [info.bmjopen@bmj.com](mailto:info.bmjopen@bmj.com)

# BMJ Open

## Need for recovery amongst Emergency Physicians in the United Kingdom and Ireland: a cross-sectional survey

|                               |                                                                                                                                                                                                                                                                                                                                                                                                                                                                                                                                                                                                                                                                                                                                                                                                                          |
|-------------------------------|--------------------------------------------------------------------------------------------------------------------------------------------------------------------------------------------------------------------------------------------------------------------------------------------------------------------------------------------------------------------------------------------------------------------------------------------------------------------------------------------------------------------------------------------------------------------------------------------------------------------------------------------------------------------------------------------------------------------------------------------------------------------------------------------------------------------------|
| Journal:                      | <i>BMJ Open</i>                                                                                                                                                                                                                                                                                                                                                                                                                                                                                                                                                                                                                                                                                                                                                                                                          |
| Manuscript ID                 | bmjopen-2020-041485                                                                                                                                                                                                                                                                                                                                                                                                                                                                                                                                                                                                                                                                                                                                                                                                      |
| Article Type:                 | Original research                                                                                                                                                                                                                                                                                                                                                                                                                                                                                                                                                                                                                                                                                                                                                                                                        |
| Date Submitted by the Author: | 09-Jun-2020                                                                                                                                                                                                                                                                                                                                                                                                                                                                                                                                                                                                                                                                                                                                                                                                              |
| Complete List of Authors:     | Cottey, Laura; University Hospitals Plymouth NHS Trust, Emergency Department; Royal Centre for Defence Medicine, Academic Department of Military Emergency Medicine<br>Roberts, Tom ; The Royal College of Emergency Medicine<br>Graham, Blair; University of Plymouth; Plymouth Hospitals NHS Foundation Trust, Emergency Department<br>Horner , Daniel; The Royal College of Emergency Medicine; Salford Royal Hospitals NHS Trust, Department of Intensive Care<br>Stevens, Kara; University of Plymouth, Medical Statistics<br>Enki, Doyo; University of Nottingham, Medical Statistics<br>Lyttle, Mark; Bristol Royal Hospital for Children, Emergency Department; University of the West of England, Faculty of Health and Applied Science<br>Latour, Jos; University of Plymouth School of Nursing and Midwifery, |
| Keywords:                     | ACCIDENT & EMERGENCY MEDICINE, HEALTH SERVICES ADMINISTRATION & MANAGEMENT, Human resource management < HEALTH SERVICES ADMINISTRATION & MANAGEMENT, Organisation of health services < HEALTH SERVICES ADMINISTRATION & MANAGEMENT, OCCUPATIONAL & INDUSTRIAL MEDICINE                                                                                                                                                                                                                                                                                                                                                                                                                                                                                                                                                   |
|                               |                                                                                                                                                                                                                                                                                                                                                                                                                                                                                                                                                                                                                                                                                                                                                                                                                          |

SCHOLARONE™  
Manuscripts

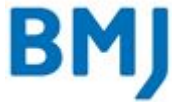

I, the Submitting Author has the right to grant and does grant on behalf of all authors of the Work (as defined in the below author licence), an exclusive licence and/or a non-exclusive licence for contributions from authors who are: i) UK Crown employees; ii) where BMJ has agreed a CC-BY licence shall apply, and/or iii) in accordance with the terms applicable for US Federal Government officers or employees acting as part of their official duties; on a worldwide, perpetual, irrevocable, royalty-free basis to BMJ Publishing Group Ltd ("BMJ") its licensees and where the relevant Journal is co-owned by BMJ to the co-owners of the Journal, to publish the Work in this journal and any other BMJ products and to exploit all rights, as set out in our [licence](#).

The Submitting Author accepts and understands that any supply made under these terms is made by BMJ to the Submitting Author unless you are acting as an employee on behalf of your employer or a postgraduate student of an affiliated institution which is paying any applicable article publishing charge ("APC") for Open Access articles. Where the Submitting Author wishes to make the Work available on an Open Access basis (and intends to pay the relevant APC), the terms of reuse of such Open Access shall be governed by a Creative Commons licence – details of these licences and which [Creative Commons](#) licence will apply to this Work are set out in our licence referred to above.

Other than as permitted in any relevant BMJ Author's Self Archiving Policies, I confirm this Work has not been accepted for publication elsewhere, is not being considered for publication elsewhere and does not duplicate material already published. I confirm all authors consent to publication of this Work and authorise the granting of this licence.

1  
2  
3  
4  
5  
6  
7  
8  
9  
10  
11  
12  
13  
14  
15  
16  
17  
18  
19  
20  
21  
22  
23  
24  
25  
26  
27  
28  
29  
30  
31  
32  
33  
34  
35  
36  
37  
38  
39  
40  
41  
42  
43  
44  
45  
46  
47  
48  
49  
50  
51  
52  
53  
54  
55  
56  
57  
58  
59  
60

1 **Need for recovery amongst Emergency Physicians in the United**  
2 **Kingdom and Ireland: a cross-sectional survey**

3  
4 Laura COTTEY, BM, BSc (Hons), MSc; Tom ROBERTS, MBChB; Blair  
5 GRAHAM, BMBS, BSc (Hons); Daniel HORNER, BA, MBBS, MD; Kara  
6 STEVENS, PhD; Doyo ENKI, PhD; Mark D LYTTLE, MBChB; Jos M.  
7 LATOUR, RN, PhD; On behalf of the Trainee Emergency Research Network  
8 (TERN) and Paediatric Emergency Research in the UK and Ireland (PERUKI).

9  
10 Dr Laura COTTEY

11 Academic Clinical Fellow Emergency Medicine, University Hospitals Plymouth  
12 NHS Trust, UK

13 Academic Department of Military Emergency Medicine, Royal Centre for  
14 Defence Medicine, Birmingham, UK

15 Dr Tom ROBERTS

16 Research Fellow Trainee Emergency Research Network (TERN), Royal  
17 College of Emergency Medicine, London, UK.

18 Dr Blair GRAHAM

19 Lecturer in Urgent & Emergency Care, Faculty of Health, Plymouth University,  
20 UK

21 Speciality Registrar in Emergency Medicine, University Hospitals Plymouth  
22 NHS Trust, UK

23 Professor Daniel HORNER

24 Professor of the Royal College of Emergency Medicine

25 Consultant in Emergency and Critical Care Medicine, Salford Royal NHS  
26 Foundation Trust, UK

27 Dr Kara STEVENS

28 Research Fellow in Medical Statistics, Faculty of Health, University of  
29 Plymouth, UK

30 Dr Doyo ENKI

31 Senior Medical Statistician, Faculty of Medicine & Health Sciences, University  
32 of Nottingham, UK

33 Dr Mark D. LYTTLE

34 Emergency Department, Bristol Royal Hospital for Children, Bristol, UK

35 Faculty of Health and Applied Sciences, University of the West of England,  
36 Bristol, UK

37 Professor Jos M. LATOUR

38 Professor of Clinical Nursing, Faculty of Health, University of Plymouth, UK

39

40 The list of Trainee Emergency Research Network and Paediatric Emergency  
41 Research in the UK and Ireland collaborators is included at the end of the  
42 statements section.

43

#### 44 **Corresponding Author**

45 Dr Laura Cottey

46 Academic Department of Military Emergency Medicine

47 Royal Centre for Defence Medicine

48 ICT Centre

49 Birmingham Research Park

50 Vincent Drive

51 Edgbaston

52 Birmingham

53 B15 2SQ

54 Email: laurajcottey@gmail.com

55 Phone 07470 277184

56

#### 57 **Manuscript data:**

58 Abstract: 266

59 Word Count (Main Body): 2816

60 References: 44

61 Electronic Supplementary Material: 4

62 Figures: 2

63 Tables: 4

64

65 **Keywords:** Emergency Medicine; Human resource management;

66 Organisation of health services; Occupational and Industrial medicine.

67

1  
2  
3 **68 ABSTRACT**  
4

5 **69 Objectives:** To determine the need for recovery (NFR) among Emergency  
6  
7  
8 **70 Physicians** and to identify demographic and occupational characteristics  
9  
10 associated with higher NFR scores.  
11

12 **72 Design:** Cross-sectional electronic survey.  
13

14 **73 Setting:** Emergency Departments (n=112) in the United Kingdom and Ireland.  
15

16 **74 Participants:** Emergency Physicians (n=4247) responding over a six-week  
17  
18  
19  
20 period in June-July 2019.  
21

22 **76 Main outcome measure:** NFR score.  
23

24 **77 Results:** The median NFR score for all 4247 eligible and consented  
25  
26  
27  
28  
29  
30  
31  
32  
33  
34  
35  
36  
37  
38  
39  
40  
41  
42  
43  
44  
45  
46  
47  
48  
49  
50  
51  
52  
53  
54  
55  
56  
57  
58  
59  
60  
61  
62  
63  
64  
65  
66  
67  
68  
69  
70  
71  
72  
73  
74  
75  
76  
77  
78  
79  
80  
81  
82  
83  
84  
85  
86  
87  
88  
89  
90  
91  
92  
93  
94  
95  
96  
97  
98  
99  
100  
101  
102  
103  
104  
105  
106  
107  
108  
109  
110  
111  
112  
113  
114  
115  
116  
117  
118  
119  
120  
121  
122  
123  
124  
125  
126  
127  
128  
129  
130  
131  
132  
133  
134  
135  
136  
137  
138  
139  
140  
141  
142  
143  
144  
145  
146  
147  
148  
149  
150  
151  
152  
153  
154  
155  
156  
157  
158  
159  
160  
161  
162  
163  
164  
165  
166  
167  
168  
169  
170  
171  
172  
173  
174  
175  
176  
177  
178  
179  
180  
181  
182  
183  
184  
185  
186  
187  
188  
189  
190  
191  
192  
193  
194  
195  
196  
197  
198  
199  
200  
201  
202  
203  
204  
205  
206  
207  
208  
209  
210  
211  
212  
213  
214  
215  
216  
217  
218  
219  
220  
221  
222  
223  
224  
225  
226  
227  
228  
229  
230  
231  
232  
233  
234  
235  
236  
237  
238  
239  
240  
241  
242  
243  
244  
245  
246  
247  
248  
249  
250  
251  
252  
253  
254  
255  
256  
257  
258  
259  
260  
261  
262  
263  
264  
265  
266  
267  
268  
269  
270  
271  
272  
273  
274  
275  
276  
277  
278  
279  
280  
281  
282  
283  
284  
285  
286  
287  
288  
289  
290  
291  
292  
293  
294  
295  
296  
297  
298  
299  
300  
301  
302  
303  
304  
305  
306  
307  
308  
309  
310  
311  
312  
313  
314  
315  
316  
317  
318  
319  
320  
321  
322  
323  
324  
325  
326  
327  
328  
329  
330  
331  
332  
333  
334  
335  
336  
337  
338  
339  
340  
341  
342  
343  
344  
345  
346  
347  
348  
349  
350  
351  
352  
353  
354  
355  
356  
357  
358  
359  
360  
361  
362  
363  
364  
365  
366  
367  
368  
369  
370  
371  
372  
373  
374  
375  
376  
377  
378  
379  
380  
381  
382  
383  
384  
385  
386  
387  
388  
389  
390  
391  
392  
393  
394  
395  
396  
397  
398  
399  
400  
401  
402  
403  
404  
405  
406  
407  
408  
409  
410  
411  
412  
413  
414  
415  
416  
417  
418  
419  
420  
421  
422  
423  
424  
425  
426  
427  
428  
429  
430  
431  
432  
433  
434  
435  
436  
437  
438  
439  
440  
441  
442  
443  
444  
445  
446  
447  
448  
449  
450  
451  
452  
453  
454  
455  
456  
457  
458  
459  
460  
461  
462  
463  
464  
465  
466  
467  
468  
469  
470  
471  
472  
473  
474  
475  
476  
477  
478  
479  
480  
481  
482  
483  
484  
485  
486  
487  
488  
489  
490  
491  
492  
493  
494  
495  
496  
497  
498  
499  
500  
501  
502  
503  
504  
505  
506  
507  
508  
509  
510  
511  
512  
513  
514  
515  
516  
517  
518  
519  
520  
521  
522  
523  
524  
525  
526  
527  
528  
529  
530  
531  
532  
533  
534  
535  
536  
537  
538  
539  
540  
541  
542  
543  
544  
545  
546  
547  
548  
549  
550  
551  
552  
553  
554  
555  
556  
557  
558  
559  
560  
561  
562  
563  
564  
565  
566  
567  
568  
569  
570  
571  
572  
573  
574  
575  
576  
577  
578  
579  
580  
581  
582  
583  
584  
585  
586  
587  
588  
589  
590  
591  
592  
593  
594  
595  
596  
597  
598  
599  
600  
601  
602  
603  
604  
605  
606  
607  
608  
609  
610  
611  
612  
613  
614  
615  
616  
617  
618  
619  
620  
621  
622  
623  
624  
625  
626  
627  
628  
629  
630  
631  
632  
633  
634  
635  
636  
637  
638  
639  
640  
641  
642  
643  
644  
645  
646  
647  
648  
649  
650  
651  
652  
653  
654  
655  
656  
657  
658  
659  
660  
661  
662  
663  
664  
665  
666  
667  
668  
669  
670  
671  
672  
673  
674  
675  
676  
677  
678  
679  
680  
681  
682  
683  
684  
685  
686  
687  
688  
689  
690  
691  
692  
693  
694  
695  
696  
697  
698  
699  
700  
701  
702  
703  
704  
705  
706  
707  
708  
709  
710  
711  
712  
713  
714  
715  
716  
717  
718  
719  
720  
721  
722  
723  
724  
725  
726  
727  
728  
729  
730  
731  
732  
733  
734  
735  
736  
737  
738  
739  
740  
741  
742  
743  
744  
745  
746  
747  
748  
749  
750  
751  
752  
753  
754  
755  
756  
757  
758  
759  
760  
761  
762  
763  
764  
765  
766  
767  
768  
769  
770  
771  
772  
773  
774  
775  
776  
777  
778  
779  
780  
781  
782  
783  
784  
785  
786  
787  
788  
789  
790  
791  
792  
793  
794  
795  
796  
797  
798  
799  
800  
801  
802  
803  
804  
805  
806  
807  
808  
809  
810  
811  
812  
813  
814  
815  
816  
817  
818  
819  
820  
821  
822  
823  
824  
825  
826  
827  
828  
829  
830  
831  
832  
833  
834  
835  
836  
837  
838  
839  
840  
841  
842  
843  
844  
845  
846  
847  
848  
849  
850  
851  
852  
853  
854  
855  
856  
857  
858  
859  
860  
861  
862  
863  
864  
865  
866  
867  
868  
869  
870  
871  
872  
873  
874  
875  
876  
877  
878  
879  
880  
881  
882  
883  
884  
885  
886  
887  
888  
889  
890  
891  
892  
893  
894  
895  
896  
897  
898  
899  
900  
901  
902  
903  
904  
905  
906  
907  
908  
909  
910  
911  
912  
913  
914  
915  
916  
917  
918  
919  
920  
921  
922  
923  
924  
925  
926  
927  
928  
929  
930  
931  
932  
933  
934  
935  
936  
937  
938  
939  
940  
941  
942  
943  
944  
945  
946  
947  
948  
949  
950  
951  
952  
953  
954  
955  
956  
957  
958  
959  
960  
961  
962  
963  
964  
965  
966  
967  
968  
969  
970  
971  
972  
973  
974  
975  
976  
977  
978  
979  
980  
981  
982  
983  
984  
985  
986  
987  
988  
989  
990  
991  
992  
993  
994  
995  
996  
997  
998  
999  
1000

89 **Conclusion:** Higher NFR scores were observed among Emergency  
90  
91  
92  
93  
94  
95  
96  
97  
98  
99  
100  
101  
102  
103  
104  
105  
106  
107  
108  
109  
110  
111  
112  
113  
114  
115  
116  
117  
118  
119  
120  
121  
122  
123  
124  
125  
126  
127  
128  
129  
130  
131  
132  
133  
134  
135  
136  
137  
138  
139  
140  
141  
142  
143  
144  
145  
146  
147  
148  
149  
150  
151  
152  
153  
154  
155  
156  
157  
158  
159  
160  
161  
162  
163  
164  
165  
166  
167  
168  
169  
170  
171  
172  
173  
174  
175  
176  
177  
178  
179  
180  
181  
182  
183  
184  
185  
186  
187  
188  
189  
190  
191  
192  
193  
194  
195  
196  
197  
198  
199  
200  
201  
202  
203  
204  
205  
206  
207  
208  
209  
210  
211  
212  
213  
214  
215  
216  
217  
218  
219  
220  
221  
222  
223  
224  
225  
226  
227  
228  
229  
230  
231  
232  
233  
234  
235  
236  
237  
238  
239  
240  
241  
242  
243  
244  
245  
246  
247  
248  
249  
250  
251  
252  
253  
254  
255  
256  
257  
258  
259  
260  
261  
262  
263  
264  
265  
266  
267  
268  
269  
270  
271  
272  
273  
274  
275  
276  
277  
278  
279  
280  
281  
282  
283  
284  
285  
286  
287  
288  
289  
290  
291  
292  
293  
294  
295  
296  
297  
298  
299  
300  
301  
302  
303  
304  
305  
306  
307  
308  
309  
310  
311  
312  
313  
314  
315  
316  
317  
318  
319  
320  
321  
322  
323  
324  
325  
326  
327  
328  
329  
330  
331  
332  
333  
334  
335  
336  
337  
338  
339  
340  
341  
342  
343  
344  
345  
346  
347  
348  
349  
350  
351  
352  
353  
354  
355  
356  
357  
358  
359  
360  
361  
362  
363  
364  
365  
366  
367  
368  
369  
370  
371  
372  
373  
374  
375  
376  
377  
378  
379  
380  
381  
382  
383  
384  
385  
386  
387  
388  
389  
390  
391  
392  
393  
394  
395  
396  
397  
398  
399  
400  
401  
402  
403  
404  
405  
406  
407  
408  
409  
410  
411  
412  
413  
414  
415  
416  
417  
418  
419  
420  
421  
422  
423  
424  
425  
426  
427  
428  
429  
430  
431  
432  
433  
434  
435  
436  
437  
438  
439  
440  
441  
442  
443  
444  
445  
446  
447  
448  
449  
450  
451  
452  
453  
454  
455  
456  
457  
458  
459  
460  
461  
462  
463  
464  
465  
466  
467  
468  
469  
470  
471  
472  
473  
474  
475  
476  
477  
478  
479  
480  
481  
482  
483  
484  
485  
486  
487  
488  
489  
490  
491  
492  
493  
494  
495  
496  
497  
498  
499  
500  
501  
502  
503  
504  
505  
506  
507  
508  
509  
510  
511  
512  
513  
514  
515  
516  
517  
518  
519  
520  
521  
522  
523  
524  
525  
526  
527  
528  
529  
530  
531  
532  
533  
534  
535  
536  
537  
538  
539  
540  
541  
542  
543  
544  
545  
546  
547  
548  
549  
550  
551  
552  
553  
554  
555  
556  
557  
558  
559  
560  
561  
562  
563  
564  
565  
566  
567  
568  
569  
570  
571  
572  
573  
574  
575  
576  
577  
578  
579  
580  
581  
582  
583  
584  
585  
586  
587  
588  
589  
590  
591  
592  
593  
594  
595  
596  
597  
598  
599  
600  
601  
602  
603  
604  
605  
606  
607  
608  
609  
610  
611  
612  
613  
614  
615  
616  
617  
618  
619  
620  
621  
622  
623  
624  
625  
626  
627  
628  
629  
630  
631  
632  
633  
634  
635  
636  
637  
638  
639  
640  
641  
642  
643  
644  
645  
646  
647  
648  
649  
650  
651  
652  
653  
654  
655  
656  
657  
658  
659  
660  
661  
662  
663  
664  
665  
666  
667  
668  
669  
670  
671  
672  
673  
674  
675  
676  
677  
678  
679  
680  
681  
682  
683  
684  
685  
686  
687  
688  
689  
690  
691  
692  
693  
694  
695  
696  
697  
698  
699  
700  
701  
702  
703  
704  
705  
706  
707  
708  
709  
710  
711  
712  
713  
714  
715  
716  
717  
718  
719  
720  
721  
722  
723  
724  
725  
726  
727  
728  
729  
730  
731  
732  
733  
734  
735  
736  
737  
738  
739  
740  
741  
742  
743  
744  
745  
746  
747  
748  
749  
750  
751  
752  
753  
754  
755  
756  
757  
758  
759  
760  
761  
762  
763  
764  
765  
766  
767  
768  
769  
770  
771  
772  
773  
774  
775  
776  
777  
778  
779  
780  
781  
782  
783  
784  
785  
786  
787  
788  
789  
790  
791  
792  
793  
794  
795  
796  
797  
798  
799  
800  
801  
802  
803  
804  
805  
806  
807  
808  
809  
810  
811  
812  
813  
814  
815  
816  
817  
818  
819  
820  
821  
822  
823  
824  
825  
826  
827  
828  
829  
830  
831  
832  
833  
834  
835  
836  
837  
838  
839  
840  
841  
842  
843  
844  
845  
846  
847  
848  
849  
850  
851  
852  
853  
854  
855  
856  
857  
858  
859  
860  
861  
862  
863  
864  
865  
866  
867  
868  
869  
870  
871  
872  
873  
874  
875  
876  
877  
878  
879  
880  
881  
882  
883  
884  
885  
886  
887  
888  
889  
890  
891  
892  
893  
894  
895  
896  
897  
898  
899  
900  
901  
902  
903  
904  
905  
906  
907  
908  
909  
910  
911  
912  
913  
914  
915  
916  
917  
918  
919  
920  
921  
922  
923  
924  
925  
926  
927  
928  
929  
930  
931  
932  
933  
934  
935  
936  
937  
938  
939  
940  
941  
942  
943  
944  
945  
946  
947  
948  
949  
950  
951  
952  
953  
954  
955  
956  
957  
958  
959  
960  
961  
962  
963  
964  
965  
966  
967  
968  
969  
970  
971  
972  
973  
974  
975  
976  
977  
978  
979  
980  
981  
982  
983  
984  
985  
986  
987  
988  
989  
990  
991  
992  
993  
994  
995  
996  
997  
998  
999  
1000

1  
2  
3  
4  
5  
6  
7  
8  
9  
10  
11  
12  
13  
14  
15  
16  
17  
18  
19  
20  
21  
22  
23  
24  
25  
26  
27  
28  
29  
30  
31  
32  
33  
34  
35  
36  
37  
38  
39  
40  
41  
42  
43  
44  
45  
46  
47  
48  
49  
50  
51  
52  
53  
54  
55  
56  
57  
58  
59  
60

93 with increasing NFR score. Future strategies to reduce fatigue and improve  
94 physician wellbeing / staff retention should target these modifiable  
95 characteristics.

For peer review only

1  
2  
3 96 **ARTICLE SUMMARY**

4  
5 97  
6 98 **Strengths and limitations of this study**

- 7 99  
8 100  
9 101 • This is the first study evaluating the need for recovery (NFR) scale within a  
10  
11 large healthcare population.  
12 102  
13  
14 103  
15  
16 104 • The inclusion of responses from over half of all UK Emergency  
17  
18 Departments indicates the results are likely to be generalisable.  
19 105  
20  
21 106  
22  
23 107 • The high volume of responses, with over half of study sites exceeding 70%  
24  
25 participant response rates, indicates that the NFR scale is an acceptable  
26 108  
27 measurement tool for physicians.  
28 109  
29  
30 110  
31  
32 111 • The study is limited by the single-point of time measurement therefore  
33  
34 seasonal bias cannot be excluded and further assessment of test-retest  
35 112  
36 reliability is desirable.  
37 113  
38  
39 114  
40  
41 115 • The use of self-administered dichotomous questionnaires is acknowledged  
42  
43 to limit wider insights into physician recovery and well-being.  
44 116  
45  
46  
47  
48  
49  
50  
51  
52  
53  
54  
55  
56  
57  
58  
59  
60



## 117 INTRODUCTION

118 Recruitment and retention challenges in acute care pose a significant and  
119 ongoing threat to effective healthcare provision. The need to maintain a healthy  
120 and sustainable workforce is vital to safeguard future services.[1] Physician  
121 well-being is a key influence on retention, with low job satisfaction and high  
122 levels of stress directly leading to concern over job sustainability.[2–4] Globally,  
123 high rates of physician burnout are increasingly recognised, along with the  
124 consequent negative impact on delivery of high quality patient care.[5–10]  
125 Within unscheduled care settings such as emergency medicine, high intensity  
126 shift work is likely to further exacerbate impaired personal well-being. Where  
127 fatigue cannot be sufficiently recovered between shifts, the effect is cumulative  
128 and may lead to increased occupational stress and impaired long-term  
129 health.[11,12]

130 Attempts to quantify and measure well-being amongst healthcare staff  
131 have led to an increasing prevalence of burnout inventories.[13] Whilst these  
132 may provide an overview at an organisational level, they often lack the ability  
133 to define specific contributory factors or highlight opportunities for  
134 intervention.[14] Furthermore, these inventories quantify established burnout.  
135 Once this has occurred, the human and financial resource impact is already  
136 immense, with associated workforce depletion and limited mitigation  
137 strategies.[15,16]

138 The identification of those at risk, at an early timepoint when  
139 interventions may be effective, presents a critical challenge. The Need for  
140 Recovery (NFR) scale measures the subjective perception of the need to  
141 recuperate from physical and mental demands of a working day, and is a

1  
2  
3 142 suitable tool with which to assess shift workers.[17,18] Increasing NFR is  
4  
5 143 associated with likelihood of progression to occupational burnout and health  
6  
7 144 complaints, with negative effects cumulative over time in several validation  
8  
9 145 studies.[11,17]  
10  
11

12 146 Staff well-being is the fourth highest Emergency Medicine Research  
13  
14 147 Priority identified by the James Lind Alliance Priority Setting Partnership,  
15  
16 148 involving patients, carers and physicians.[19] This priority is related to  
17  
18 149 identification of initiatives to improve Emergency Department (ED) staff  
19  
20 150 engagement, resilience, retention, satisfaction, individuality and responsibility.  
21  
22 151 We therefore aimed to determine the NFR among Emergency Physicians in  
23  
24 152 EDs in the UK and Ireland, and identify demographic and occupational  
25  
26 153 characteristics associated with higher NFR scores that might allow for early  
27  
28 154 targeted intervention to improve physicians' well-being and reduce burnout.  
29  
30  
31  
32

33 155

## 35 156 **METHODS**

37 157 This cross-sectional electronic survey study targeted a representative sample  
38  
39 158 of Emergency Physicians working across the UK and Ireland, and was  
40  
41 159 performed and reported in line with the Checklist for Reporting Results of  
42  
43 160 Internet E-surveys.[20] The study was registered at ISRCTN  
44  
45 161 (<https://doi.org/10.1186/ISRCTN21869845>). Ethical approval was obtained  
46  
47 162 from the UK Health Research Authority (Reference: 19/HRA/2404) alongside  
48  
49 163 equivalent approvals in Scotland, Northern Ireland and Ireland.  
50  
51

### 53 164 **Settings and Participants**

54  
55 165 An initial sample of 100 EDs was deemed necessary to ensure inclusion of  
56  
57 166 greater than 50% of Type 1 EDs, defined as 'a consultant led 24-hour service  
58  
59  
60

1  
2  
3 167 with full resuscitation facilities', in England. [21] The study was coordinated via  
4  
5 168 the UK Trainee Emergency Research Network (TERN) and delivered in  
6  
7 169 collaboration with Paediatric Emergency Research in the UK and Ireland  
8  
9  
10 170 (PERUKI) and Ireland TERN. [22, 23] Signposting to the survey and enrolment  
11  
12 171 of participants was led by site principal investigators (PI), who were provided  
13  
14 172 with standardised study documentation. Local and national promotion of the  
15  
16 173 study was conducted at professional meetings, through social media, national  
17  
18 174 newsletters, and using the Clinical Research Network infrastructure.

19  
20  
21 175 Physicians of any grade who were registered with either the UK General  
22  
23 176 Medical Council or Irish Medical Council, and who were employed within a  
24  
25 177 participating ED, were invited to participate. The term Emergency Physician  
26  
27 178 was defined as doctors specialising in Emergency Medicine (EM), or non-EM  
28  
29 179 specialists undertaking rotations in the ED as part of their professional training.  
30  
31 180 Physicians who did not hold a permanent contract with a participating hospital  
32  
33 181 (such as those working ad-hoc locum shifts), those on leave during the study  
34  
35 182 period, and those in a non-clinical role were excluded.

### 36 37 38 39 183 **Survey Development**

40  
41  
42 184 The NFR scale consists of 11 items each requiring a dichotomous 'yes' or 'no'  
43  
44 185 response, originally developed as a subscale of the Dutch Questionnaire on the  
45  
46 186 Experience and Evaluation of Work (QEEW).[24] The NFR has previously been  
47  
48 187 demonstrated to have an overall Cronbach's alpha of 0.88, a measure of  
49  
50 188 internal consistency and questionnaire reliability, with a range of 0.81 to 0.92 in  
51  
52 189 subgroup analyses of the same validation study.[25] Following a minor  
53  
54 190 amendment to one question to increase applicability to the study population  
55  
56 191 (from 'After the evening meal, I generally feel in good shape' to 'After my breaks  
57  
58  
59  
60

1  
2  
3 192 I feel fresh to continue my work'), feasibility work in a single UK centre  
4  
5 193 demonstrated a Cronbach's alpha of 0.79, and found that the NFR scale was  
6  
7 194 acceptable and user-friendly. [26]  
8  
9

10 195 A patient and public involvement (PPI) consultation was conducted at  
11  
12 196 the UK Emergency Medicine Trainee Association Conference (Cardiff,  
13  
14 197 December 2018), using a semi-structured question guide for mixed focus  
15  
16 198 groups to review a proposed participant survey. Based on this consultation, the  
17  
18 199 final participant survey included the 11-item NFR scale used in the feasibility  
19  
20 200 work and 44-items collecting the participants' demographic, occupational and  
21  
22 201 perceived well-being characteristics (Online Supplementary Material 1).  
23  
24  
25

26 202 A separate site-specific survey was developed de novo with expert input  
27  
28 203 from experienced EM physicians, consisting of 39-items identified from the  
29  
30 204 literature and/or consensus of the study team, which explored departmental,  
31  
32 205 rota pattern and staffing characteristics likely to provide context for analysis and  
33  
34 206 interpretation of individual survey results (Online Supplementary Material 2).  
35  
36 207 Only one site-specific survey was required per participating centre and was  
37  
38 208 completed by the site PI.  
39  
40  
41

#### 42 209 **Survey Distribution, monitoring and recruitment**

43

44 210 All participants were provided with an information sheet, and consented to  
45  
46 211 participation prior to completing the survey; this was voluntary, anonymous, and  
47  
48 212 no incentives were given. Respondents were able to review and change their  
49  
50 213 answers prior to final submission of the survey. Branching logic was used for  
51  
52 214 responses to certain questions. Data were collected during a six-week period  
53  
54 215 from 3rd June 2019. The participant and site-specific surveys were open  
55  
56 216 surveys accessed through a link and hosted on a research specific electronic  
57  
58  
59  
60

1  
2  
3 217 survey platform, Research Electronic Data Capture platform ('REDCap';  
4  
5 218 University of Bristol), which complies with European General Data Protection  
6  
7  
8 219 Regulations.[27,28]  
9

10 220 Prior to study commencement, site PIs provided a best estimate of  
11  
12 221 eligible participants which accounted for local physician absence due to  
13  
14 222 sickness, leave, and factors such as sabbaticals and professional  
15  
16  
17 223 secondments. This denominator was used to give a best-estimate of the per-  
18  
19 224 site survey response rate, with a stated aim of achieving a 70% response rate.  
20

### 21 225 **Statistical Analysis**

22  
23  
24 226 Statistical analysis was undertaken using STATA 14. [29] Participants were  
25  
26 227 only included in any of the reported analyses if they were from one of the 112  
27  
28 228 registered sites and provided a response for at least eight of the 11 items of the  
29  
30 229 NFR scale as per imputation guidelines. Imputation was performed by replacing  
31  
32  
33 230 missing items with the mean of all completed items responses. [30]  
34

35 231 As one item in the NFR scale was amended due to applicability to the  
36  
37 232 study population, the internal consistency of the NFR scale for all participants  
38  
39 233 with a valid NFR score was calculated by Cronbach's alpha.  
40

41  
42 234 To describe the study sample the frequency and percentage of  
43  
44 235 participants by site, demographic and occupational characteristics is reported.  
45  
46  
47 236 As the distribution of the NFR score in this study was negatively skewed,  
48  
49 237 summary statistics of the median NFR score are reported with corresponding  
50  
51 238 bootstrapped 95% confidence intervals from 1000 replications (providing there  
52  
53  
54 239 are at least 8 observations to allow for sufficient number of sample  
55  
56 240 combinations), and inter-quartile ranges (IQR) of all eligible participants. Box  
57  
58  
59  
60

241 plots were used as visual aids to identify covariates that may have a statistically  
 242 significant association with the NFR score and the nature of the relationship.

243 To facilitate comparisons with previous published literature and given  
 244 the large number of participants, we fitted Gaussian, mixed effects, linear  
 245 regression models to NFR score, where site was included as a random effect  
 246 to account for potentially unknown differences between different EDs. To  
 247 identify statistically significant associations between the NFR score and  
 248 observed covariates, the forward model selection procedure was implemented;  
 249 inclusion in the model was based upon the goodness of fit test at the 5% level  
 250 of significance, using only participants with complete NFR score and covariate  
 251 data. The final model was estimated using participants with complete data for  
 252 the included covariates and NFR score. Quantile regression was used to  
 253 confirm the direction and significance of the identified associations under non-  
 254 parametric assumptions.

## 256 RESULTS

257 Characteristics of the 112 participating sites are presented in table 1.

258 **Table 1: Characteristics of sites registered to take part in the survey study**

| Site Characteristics | N (%)<br>Total = 112 |
|----------------------|----------------------|
| Country              |                      |
| England              | 89 (79.5)            |
| Wales                | 3 (2.7)              |
| Northern Ireland     | 3 (2.7)              |
| Scotland             | 12 (10.7)            |
| Republic of Ireland  | 5 (4.4)              |
| ED Annual Attendance |                      |

|                               |           |
|-------------------------------|-----------|
| ≤ 50,000                      | 11 (9.8)  |
| 50,001 to 100,000             | 46 (41.1) |
| >100,000                      | 42 (37.5) |
| <i>Missing</i>                | 13 (11.6) |
| <b>Specialist Designation</b> |           |
| Trauma Unit                   | 55 (49.1) |
| Major Trauma Centre           | 25 (22.3) |
| Stroke Centre                 | 42 (37.5) |
| PCI Centre                    | 30 (26.8) |

259

260

*ED Emergency department*

261

*PCI Percutaneous Coronary Intervention*

262

263

264

Of 5107 unique visits to the online survey, 4365 of these were registered at one

265

of the 112 sites and provided consent, with 4247 completing at least 8 items of

266

the NFR scale. Cronbach's alpha for all participants with a valid NFR score was

267

0.80. The median NFR score across all eligible participants was 70.0 (95% CI:

268

65.5 to 74.5), with an IQR of 45.5 – 90.0. Figure 1 and Figure 2, and tables 2

269

and 3 present a selection of participant's NFR score by demographic and

270

occupational characteristics, with additional characteristics presented in the

271

Online Supplementary Material 3.

272

273

**Table 2: Summary statistics of NFR score by participant's characteristics.** Frequency and percentage, median Need for Recovery (NFR) score with 95% bootstrapped confidence intervals and the inter-quartile range of participants within each category.

274

| Participant Characteristics                  | N (%)      | NFR Score           |               |
|----------------------------------------------|------------|---------------------|---------------|
|                                              |            | Median (95% CI)     | [LQ - UQ]     |
| All participants                             | 4247 (100) | 70.0 (62.0 to 78.0) | [45.5 - 90.0] |
| Length of time worked in current ED (months) |            |                     |               |
| 0 to 3                                       | 740 (17.5) | 72.7 (71.7 to 73.8) | [45.5 - 90.9] |
| > 3 to 6                                     | 848 (20.0) | 72.7 (72.7 to 72.7) | [54.5 - 90.9] |
| > 6 to 12                                    | 729 (17.2) | 72.7 (64.7 to 80.7) | [45.5 - 90.9] |
| > 12 to 24                                   | 370 (8.7)  | 63.6 (58.8 to 68.4) | [45.5 - 90.9] |
| > 24 to 60                                   | 583 (13.8) | 63.6 (62.2 to 65.1) | [36.4 - 81.8] |

|                                                            |             |                        |               |
|------------------------------------------------------------|-------------|------------------------|---------------|
| > 60 to 120                                                | 497 (11.7)  | 63.6 (56.7 to 70.5)    | [36.4 - 81.8] |
| > 120                                                      | 473 (11.2)  | 54.5 (46.6 to 62.5)    | [36.4 - 81.8] |
| Missing                                                    | 7 (0.2)     | 18.2 (NA) <sup>1</sup> | [9.1 - 54.5]  |
| <b>Type of contract</b>                                    |             |                        |               |
| 100%                                                       | 3445 (83.5) | 72.7 (67.1 to 78.4)    | [45.5 - 90.9] |
| 90%                                                        | 72 (1.7)    | 63.6 (54.0 to 73.3)    | [36.4 - 81.8] |
| 80%                                                        | 200 (4.8)   | 63.6 (61.4 to 65.8)    | [45.5 - 81.8] |
| 70%                                                        | 116 (2.8)   | 72.7 (63.6 to 81.9)    | [50.0 - 81.8] |
| 60%                                                        | 142 (3.4)   | 63.6 (54.4 to 72.9)    | [45.5 - 90.9] |
| 50%                                                        | 85 (2.1)    | 63.6 (53.5 to 73.7)    | [36.4 - 81.8] |
| < 50%                                                      | 66 (1.6)    | 50.0 (35.7 to 64.3)    | [27.3 - 81.8] |
| Missing                                                    | 121 (2.9)   | 72.7 (67.8 to 77.7)    | [54.5 - 90.9] |
| <b>Significant caring responsibilities outside of work</b> |             |                        |               |
| No                                                         | 2616 (63.6) | 72.7 (68.5 to 77.0)    | [45.5 - 90.9] |
| Yes                                                        | 1427 (34.7) | 63.6 (62.8 to 64.5)    | [36.4 - 81.8] |
| Prefer not to say                                          | 73 (1.8)    | 81.8 (71.0 to 92.7)    | [54.5 - 90.9] |
| Missing                                                    | 131 (3.2)   | 72.7 (68.2 to 77.3)    | [54.5 - 90.9] |

275 <sup>1</sup> Insufficient observations for Bootstrapped 95% confidence intervals based

276 ST1-ST2 Specialist training year 1-2 (this included physicians training in Anaesthetics, Emergency  
277 Medicine, Acute Medicine and General Practice)

278 SASG Staff grade, associate specialist and speciality grade

279 GP General Practitioner working within the ED

280  
281

282 **Table 3: Summary statistics of NFR score by occupational characteristics.** Frequency  
283 and percentage, median Need for Recovery (NFR) score with 95% bootstrapped confidence  
284 intervals and the inter-quartile range of participants within each category.

| Occupational Characteristics                                    | N (%)       | NFR Score                    |               |
|-----------------------------------------------------------------|-------------|------------------------------|---------------|
|                                                                 |             | Median (95% CI) <sup>1</sup> | [LQ - UQ]     |
| All participants                                                | 4247 (100)  | 70.0 (62.0 to 78.0)          | [45.5 - 90.0] |
| scheduled weekend work frequency                                |             |                              |               |
| 1 in 2                                                          | 1479 (36.0) | 72.7 (72.3 to 73.2)          | [54.5 - 90.9] |
| 1 in 3                                                          | 865 (21.1)  | 72.7 (68.1 to 77.4)          | [45.5 - 90.9] |
| 1 in 4                                                          | 542 (13.2)  | 63.6 (57.1 to 70.2)          | [45.5 - 81.8] |
| 1 in 5                                                          | 310 (7.5)   | 54.5 (48.4 to 60.7)          | [36.4 - 81.8] |
| 1 in 6                                                          | 485 (11.8)  | 54.5 (49.8 to 59.3)          | [27.3 - 81.8] |
| < 1 in 6                                                        | 307 (7.5)   | 63.6 (55.2 to 72.1)          | [36.4 - 81.8] |
| None                                                            | 121 (2.9)   | 54.5 (45.7 to 63.4)          | [27.3 - 81.8] |
| Missing                                                         | 138 (3.4)   | 72.7 (65.9 to 79.6)          | [45.5 - 90.9] |
| Maximum number of consecutive clinical shifts scheduled to work |             |                              |               |
| 1                                                               | 52 (1.3)    | 63.6 (45.1 to 82.2)          | [27.3 - 90.9] |
| 2                                                               | 190 (4.6)   | 54.5 (47.6 to 61.5)          | [27.3 - 72.7] |
| 3                                                               | 465 (11.3)  | 63.6 (60.3 to 67.0)          | [36.4 - 81.8] |
| 4                                                               | 783 (19)    | 63.6 (63.0 to 64.3)          | [45.5 - 81.8] |
| 5                                                               | 827 (20.1)  | 72.7 (66.2 to 79.3)          | [45.5 - 81.8] |



|         |            |                     |               |
|---------|------------|---------------------|---------------|
| 6       | 389 (9.5)  | 72.7 (67.3 to 78.2) | [45.5 - 90.0] |
| 7       | 855 (20.8) | 72.7 (70.8 to 74.6) | [45.5 - 90.9] |
| 8       | 554 (13.5) | 72.7 (66.5 to 78.9) | [54.5 - 90.9] |
| Missing | 132 (3.2)  | 72.7 (67.9 to 77.6) | [54.5 - 90.9] |

285 <sup>1</sup> Bootstrapped 95% confidence intervals based on 1000 replications on a minimum of 8  
 286 observations.  
 287

288         Only 7.5% of the participants were aged over 50 years, and the majority  
 289 were aged between 26 and 30 years (28.6%). NFR score appeared to decrease  
 290 with age, such that those in age groups 20 to 35 years all had a median score  
 291 of 72.7, age groups 36 to 55 had a median score of 63.6, and those over 55  
 292 years had a median score of 54.5 (figure 1a). There was a reasonable balance  
 293 between males and females, with just over 1% who did not submit a response  
 294 (missing), preferred not to say or other. The evidence suggested that females  
 295 had a higher median NFR score of 72.7 (95% CI: 70.5 to 75.0) compared with  
 296 males 63.6 (95% CI: 60.8 to 66.5) (figure 1b). Within clinical grade, consultants  
 297 accounted for over a quarter of the participants who (with GPs) had the lowest  
 298 median NFR score of 54.5 (consultants 95% CI: 53.6 to 55.5) compared with  
 299 72.7 in all other grades (figure 1c). The majority of participants had no long-  
 300 term health conditions or disability (88.6%), with a lower NFR score of 63.6  
 301 (95% CI 60.2 to 67.1) compared with those who did report a long-term health  
 302 condition or disability 72.7 (95% CI: 66.2 to 79.2) (figure 1d). Most participants  
 303 worked full time (83.5%), but overall, the NFR score did not decrease as  
 304 contract proportion decreased (table 2). Over half (54.6%) had been working in  
 305 their current ED for 1 year or less and generally had higher NFR scores  
 306 compared to those present for over 1 year. Less than 35% of participants  
 307 declared significant caring responsibilities outside of work, but those who do  
 308 had a lower median NFR score (63.6, 95% CI: 62.8 to 64.5) than those who did  
 309 not (72.7, 95% CI: 68.5 to 77.0).

310 Most of the participants agreed or strongly agreed they were able to  
 311 obtain study (68%) or annual (>73%) leave when requested. As the ability to  
 312 obtain study and annual leave on request increased, the NFR score decreased  
 313 from 81.8 (95% CI: 81.4 to 82.2) to 54.5 (95% CI: 49.4 to 59.7) for study leave  
 314 and 81.8 (95% CI: 76.4 to 87.2) to 60.0 (95% CI: 51.8 to 68.2) for annual leave  
 315 (figures 2a and 2b). There was evidence the NFR score increased as the  
 316 proportion of time working out of hours increased, from 54.5 (95% CI: 47.8 to  
 317 61.3) to 81.8 (95% CI: 75.4 to 88.3) (figure 2c). Over 75% of participants spent  
 318 the majority of their time in adult EM with a median NFR score of 72.7 for mixed  
 319 or adult only, which was higher when compared with paediatrics only 63.6 (95%  
 320 CI: 55.2 to 72.1) (figure 2d). Most participants worked 1 in 2 weekends (36%)  
 321 with a median NFR score of 72.7, which decreased to 54.5 for those who did  
 322 not work any weekend shifts (see table 3). Over 50% reported working 5 to 8  
 323 consecutive clinical shifts with a median NFR score of 72.7 compared with  
 324 those who worked less than five, with a median NFR  $\leq$  63.6.

325 The summary statistics of the final regression model are presented in  
 326 table 4.

327 **Table 4: Summary of final Gaussian, mixed effects, linear regression model fitted to the**  
 328 **Need for Recovery (NFR) score, including the adjusted coefficient estimate (Adj. Coef.**  
 329 **Est.) with corresponding 95% confidence interval (CI) and p-value.**

|                                                                 | Adj. Coeff. Est. (95% CI) | P-value <sup>1</sup> |
|-----------------------------------------------------------------|---------------------------|----------------------|
| Constant<br>(baseline NFR score)                                | 59.51(55.53 to 63.49)     | < 0.001              |
| Gender (baseline = Male)                                        |                           |                      |
| • Female                                                        | 3.40(1.80 to 4.99)        | < 0.001              |
| • Other/Prefer not to say                                       | -0.46(-9.07 to 8.15)      | 0.916                |
| Any long-term health conditions or disabilities (baseline = No) |                           |                      |
| • Yes                                                           | 8.52(5.67 to 11.36)       | < 0.001              |
| • Prefer not to say                                             | 6.24(1.52 to 10.95)       | 0.01                 |

| ED paediatrics only? (baseline = No)                                           |                        |         |
|--------------------------------------------------------------------------------|------------------------|---------|
| • Yes                                                                          | -7.08(-10.4 to -3.77)  | < 0.001 |
| Clinical grade (baseline = Foundation)                                         |                        |         |
| • ST1-ST2                                                                      | -0.08(-2.67 to 2.51)   | 0.953   |
| • > ST2                                                                        | 1.32(-1.37 to 4.01)    | 0.336   |
| • SASG                                                                         | -1.13(-4.27 to 2.02)   | 0.482   |
| • GP                                                                           | -8.26(-15.09 to -1.44) | 0.018   |
| • Consultant                                                                   | -5.30(-8.07 to -2.53)  | < 0.001 |
| I have been able to request and take study when I wanted (baseline = Neutral)  |                        |         |
| • Strongly disagree                                                            | 4.23(-0.26 to 8.71)    | 0.065   |
| • Disagree                                                                     | 3.72(0.29 to 7.15)     | 0.034   |
| • Agree                                                                        | -1.32(-3.60 to 0.96)   | 0.257   |
| • Strongly agree                                                               | -6.50(-9.43 to -3.56)  | < 0.001 |
| I have been able to request and take annual when I wanted (baseline = Neutral) |                        |         |
| • Strongly disagree                                                            | 6.43(2.03 to 10.83)    | 0.004   |
| • Disagree                                                                     | 1.13(-2.34 to 4.61)    | 0.523   |
| • Agree                                                                        | -2.84(-5.54 to -0.14)  | 0.039   |
| • Strongly agree                                                               | -4.89(-8.06 to -1.72)  | 0.002   |
| Proportion of time spent working out of hours (baseline = 0-25%)               |                        |         |
| • 26-50%                                                                       | 5.74(3.13 to 8.35)     | < 0.001 |
| • 51-75%                                                                       | 10.32(7.60 to 13.03)   | < 0.001 |
| • 76-100%                                                                      | 14.45(10.97 to 17.92)  | < 0.001 |

<sup>1</sup> Null hypothesis: Adjusted Coefficient Estimate = 0 (i.e. is there statistically significant evidence this category differs from the baseline category)

332

333 This model was based on 3979 participants with complete data for all the  
 334 included covariates. Quantile regression confirmed the direction and  
 335 significance of the associations remained the same (Online Supplementary  
 336 Material 4). The results from this model indicated there were statistically  
 337 significant associations between gender, health conditions, type of ED (adult  
 338 or paediatric), clinical grade, access to annual and study leave, and time  
 339 spent working out of hours. The model suggested that males, GPs or  
 340 consultants, those working in paediatrics and those with no long-term health  
 341 condition or disability had the lowest NFR score. The greatest increase in

1  
2  
3 342 NFR score was associated with those who reported more than a 75%  
4  
5 343 proportion of out of hours work (14.45: 95% CI 10.97 to 17.92). If participants  
6  
7 344 strongly agreed they were able to obtain study leave upon request this  
8  
9 345 reduced their NFR score by 6.5 (95% CI: 3.56 to 9.43) and annual leave could  
10  
11 346 reduce their NFR score 4.89 (95% CI 1.72 to 8.06).  
12  
13  
14

15 347

## 17 348 **DISCUSSION**

19 349 Emergency Physicians in the UK and Ireland have a higher NFR score than  
20  
21 350 has been reported in any previously studied population.[17,31–35] Three  
22  
23 351 modifiable occupational factors were significantly associated with higher NFR  
24  
25 352 scores (poor access to annual leave, and study leave, and proportion of out of  
26  
27 353 hours work), and four further non-modifiable demographic factors were  
28  
29 354 associated with a decreased NFR score. These were consultant grade  
30  
31 355 seniority, male gender, absence of long-term health condition or disability, and  
32  
33 356 working in a paediatric only ED.  
34  
35  
36  
37

38 357

40 358 The NFR score found in this study compares unfavourably with multiple other  
41  
42 359 occupational groups. Whilst several confounders should be considered, useful  
43  
44 360 context against which to compare our findings does exist, albeit not from UK  
45  
46 361 settings. Measurement in shift workers (including hospital nurses) showed  
47  
48 362 significantly lower NFR scores, [11,31] as did studies of heavy goods vehicle  
49  
50 363 drivers and merchant seafarers, all with average NFR scores in the range 36-  
51  
52 364 44.[34,35]

53  
54  
55  
56  
57 365 The three modifiable occupational factors represent areas of autonomy  
58  
59 366 and control, correlating well with previous work establishing these as core  
60

1  
2  
3 367 drivers to minimise physician workplace stress and ensure well-being. [2,36,37]  
4  
5 368 Prioritising change in these domains may result in NFR score reduction, and  
6  
7 369 reduce negative effects on health and well-being including occupational  
8  
9  
10 370 burnout. Whilst out of hours working is inherent and unavoidable in EM, the  
11  
12 371 linear relationship we observed suggests that any reduction may result in direct  
13  
14 372 improvements in NFR, and evidence-based strategies such as proportional  
15  
16 373 control of 'out of hours' working, annualised rota patterns and/or provision of  
17  
18 374 rest facilities should therefore be considered urgently.[38–40]  
19  
20

21 375 As NFR does not change with seniority prior to consultant level it is  
22  
23 376 possible that the reduction in NFR seen in this cohort supports the hypothesis  
24  
25 377 that broader perceptions of job autonomy and control, likely gained at this level,  
26  
27 378 may be explicitly linked to well-being in healthcare.[2,37] Further areas merit  
28  
29 379 exploration including the link to out of hours working and possible qualitative  
30  
31 380 enquiry of personal experience and clinical performance.  
32  
33  
34

35 381  
36  
37 382 The relationship observed between gender and NFR is likely to be overly  
38  
39 383 simplistic requiring further evaluation. Presumed confounding variables  
40  
41 384 affecting this issue (such as a primary carer role and domestic responsibilities)  
42  
43 385 have been previously reported to be unrelated or protective against  
44  
45 386 maladaptive fatigue and are supported with findings from this study. [41]  
46  
47  
48

49 387 Awareness of the four demographic factors identified could be important at a  
50  
51 388 departmental planning level and increase advocacy for colleagues at greatest  
52  
53 389 risk of impaired well-being.  
54  
55

56 390  
57  
58  
59  
60

1  
2  
3 391 The main strength of our study is inclusion of responses from over half  
4  
5 392 of all UK EDs, enhancing generalisability of our findings.[42] The high volume  
6  
7 393 of responses indicate the NFR scale is an acceptable measure for physicians,  
8  
9 394 with over half of sites exceeding 70% response rates. A key weakness is the  
10  
11 395 single-point-of-time measurement, as seasonal bias may have affected NFR  
12  
13 396 scores. Furthermore, we acknowledge the disadvantages of self-administered  
14  
15 397 dichotomous questionnaires which may limit the richness of insights.[43,44]  
16  
17 398 Open-ended questions may be desirable in future survey iterations.  
18  
19  
20

21 399 The median NFR observed in our study reflects current challenges  
22  
23 400 facing EM, and may represent a precursor to sustained burnout in a high  
24  
25 401 proportion of the current workforce. Conversely we have identified simple  
26  
27 402 interventions that may reduce these high levels, and improve well-being.  
28  
29 403 Iterative delivery of the NFR scale following interventions will confirm or refute  
30  
31 404 the impact of such changes, and may identify further areas which will result in  
32  
33 405 continual improvement. Such work should also include other ED staff groups to  
34  
35 406 gain a broader picture across the multiprofessional ED team.  
36  
37  
38  
39

40  
41 407

42 408 In conclusion, this study provides a robust estimate of the NFR for  
43  
44 409 Emergency Physicians in the UK and Ireland, which is higher than any  
45  
46 410 occupation reported to date. Several potentially modifiable occupational  
47  
48 411 characteristics were associated with higher NFR, and future work to assess the  
49  
50 412 impact of modifying these factors will inform strategies to reduce NFR. In time  
51  
52 413 this may lead to improved long-term physician well-being and enhanced staff  
53  
54 414 retention.  
55  
56  
57  
58  
59  
60

1  
2  
3 415 **Funding statement:**  
4

5 416 This project was funded through a grant from the Royal College of Emergency  
6  
7 417 Medicine (RCEM) (Reference number: G/2018/1). This study was independent  
8  
9 418 of RCEM, and the sponsor had no role in the design of this study and no role  
10  
11 419 during its execution, analyses, interpretation of the data, or decision to submit  
12  
13 420 results.  
14  
15  
16

17 421

18  
19 422 **Competing interests:**  
20

21 423 All authors have completed the ICMJE uniform disclosure form and declare: no  
22  
23 424 support from any organisation for the submitted work; TR has received 50%  
24  
25 425 salary funding for two years as the Trainee Emergency Research Network  
26  
27 426 fellow from the Royal College of Emergency Medicine; DH reports an honorary  
28  
29 427 role as the Professor of the Royal College of Emergency Medicine during the  
30  
31 428 conduct of this study; no other relationships or activities that could appear to  
32  
33 429 have influenced the submitted work.  
34  
35  
36

37 430

38  
39 431 **Patient and Public Involvement statement:**  
40

41 432 The concept of the research was presented to over 100 members of the  
42  
43 433 public at a Research & Development PPI Conference on 20<sup>th</sup> September  
44  
45 434 2018. Participants were supportive of the concept of the study, and no  
46  
47 435 concerns were raised. Further public and stakeholder engagement took place  
48  
49 436 through a workshop held at the UK Emergency Medicine Trainees Association  
50  
51 437 Annual Conference in December 2018, this influenced the outcome measures  
52  
53 438 and survey design including the removal of a formal burnout inventory due to  
54  
55  
56  
57  
58  
59  
60

1  
2  
3 439 perceptions and experience of respondent fatigue in the target participant  
4  
5 440 group.  
6  
7

8 441

9  
10 442 **Ethics Approval:**

11  
12 443 This study protocol was submitted through the Integrated Research Application  
13  
14 444 System (IRAS), IRAS number 262048 and received proportionate ethical  
15  
16  
17 445 approval by the Health Research Authority and Health and Care Research  
18  
19 446 Wales, Research Ethics Committee reference 19/HRA/2404 and equivalent  
20  
21 447 approvals in Scotland, Northern Ireland and Ireland. All participants provided  
22  
23  
24 448 informed consent prior to beginning the survey  
25

26 449

27  
28 450 **Data sharing:**

29  
30 451 De-identified participant level data by site will be made available on  
31  
32 452 reasonable request through the study team ([tern@rcem.ac.uk](mailto:tern@rcem.ac.uk)). Data will be  
33  
34 453 available for researchers whose proposed use of the data has been approved  
35  
36  
37 454 by the study team.  
38

39 455

40  
41  
42 456 **Transparency statement:**

43  
44 457 The lead author, Dr Laura Cottey, and the co-authors affirm that this manuscript  
45  
46 458 is an honest, accurate, and transparent account of the study being reported;  
47  
48 459 that no important aspects of the study have been omitted; and that any  
49  
50 460 discrepancies from the study as planned have been explained.  
51

52 461

53  
54 462  
55  
56  
57  
58  
59  
60



1  
2  
3 463 **Dissemination to participants and related patient and public**

4  
5 464 **communities:**

6  
7 465 The authors are unable to disseminate the result of the research to study  
8  
9 466 participants directly, but the results will be made publicly available through  
10  
11 467 open access publication and dissemination of the results through site principal  
12  
13 468 investigators and social media.  
14  
15

16  
17 469

18  
19 470 **Acknowledgments:**

20  
21 471 The authors would like to thank the Royal College of Emergency Medicine  
22  
23 472 and University Hospitals Plymouth NHS Trust Research and Development  
24  
25 473 Department for their support with the study. In addition, we like to thank the  
26  
27 474 following individuals for study input: Professor Jason E Smith for providing  
28  
29 475 feedback on study design; Victoria Yates and Dr Chris Rollinson for their  
30  
31 476 support as study sponsorship team; Mark Mills for conducting data analysis  
32  
33 477 for the feasibility work; Dr Ffion Barham for providing assistance with initial  
34  
35 478 data analysis. Finally, we would like to acknowledge I-TERN, for  
36  
37 479 their invaluable support recruiting patients to the study within Ireland.  
38  
39

40  
41 480

42  
43  
44 481 **Contributors:**

45  
46 482 LC, TR and BG contributed to the development of the study design, data  
47  
48 483 collection and analysis, the first draft of the manuscript and subsequent revised  
49  
50 484 versions. DH and JML contributed to the development of the study design, data  
51  
52 485 analysis, the first draft of the manuscript and subsequent revised versions. MDL  
53  
54 486 contributed to survey development, data collection and final version of  
55  
56 487 manuscript; KS and DE provided the statistical analysis plan and contributed to  
57  
58  
59  
60

1  
2  
3 488 data analysis, the first draft of the manuscript and subsequent revised versions.  
4  
5 489 All authors approved the final version of the manuscript for submission. LC is  
6  
7 490 the guarantor. TERN and PERUKI collaborators contributed to local study  
8  
9 491 promotion and participant recruitment.  
10  
11  
12  
13

14 492

15 493 **List of Trainee Emergency Research Network and Paediatric Emergency**  
16 494 **Research in the UK and Ireland collaborators**

17 495

18 496 **Site study leads**

19  
20 497 L Kane (Aberdeen Royal Infirmary); S Richter, J Selway (Addenbrooke's  
21  
22 498 Hospital, Cambridge); C Rimmer (Aintree Hospital, Liverpool); M Ayres  
23  
24 499 (Airedale General Hospital, West Yorkshire); C Ponami (Barking, Havering  
25  
26 500 and Redbridge University Hospitals NHS Trust); A Quartermain (Basingstoke  
27  
28 501 and North Hampshire Hospital); K Kaur (Bedford Hospital); S Hartshorn  
29  
30 502 (Birmingham Children's Hospital); K McGregor (Bradford Royal Infirmary); G  
31  
32 503 Gardner (Bristol Royal Hospital for Children), T Clingo (Bristol Royal  
33  
34 504 Infirmary); R Stewart (Chelsea & Westminster Hospital); N Mullen (South  
35  
36 505 Tyneside and Sunderland NHS Foundation Trust); K Mirza (Colchester  
37  
38 506 Hospital); T Hussan (County Durham and Darlington NHS Foundation Trust);  
39  
40 507 P Cuthbert (Craigavon Area Hospital, County Armagh); M Alex (Croydon  
41  
42 508 University Hospital); F Barham (Derriford Hospital, Plymouth), A Bayston  
43  
44 509 (Doncaster and Bassetlaw Hospital NHS Trust); K Veeramuthu (East Surrey  
45  
46 510 Hospital); R Macfarlane (Epsom and St Helier NHS Trust); J Criddle (Evelina  
47  
48 511 London Children's Hospital); G Lipton (Forth Valley Royal Hospital); K New  
49  
50 512 (Frimley Park Hospital); M Jee Poh Hock, Etimbuk Umana (Galway University  
51  
52 513 Hospital, Republic of Ireland); C Ward (Glasgow Royal Infirmary); V Agosti, M  
53  
54 514 Connelly (Gloucestershire Hospitals Foundation Trust); C Weegenaar (Great  
55  
56 515 Western Hospital, Swindon); J Kerr (Hampshire Hospitals NHS Trust); SJ  
57  
58 516 Dhutia, T Owens (Homerton University Hospital); B Cherian (Hull University  
59  
60 517 Teaching Hospital); U Basit, D Hartin (Ipswich Hospital); O Williams (James  
518  
519 518 Cook University Hospital, Middlesbrough); C Lindsay (James Paget University  
Hospital); F Cattle (King's College Hospital, London); S Manou (Leeds

1  
2  
3 520 Teaching Hospitals NHS Trust); MH Elwan, C Nunn (Leicester Royal  
4 Infirmery); R Fuller (Leighton Hospital, Crewe); S Stevenson (Limerick  
5 Regional Hospital, Republic of Ireland); C Reynard (Manchester University  
6 NHS Foundation Trust); J Daly (Mater Misericordiae University Hospital,  
7 Republic of Ireland); A Da'Costa (Medway Foundation NHS Trust); L How  
8 (Milton Keynes Hospital); G Boggaram, D McConnell (Musgrove Park  
9 Hospital, Taunton); R Hirst, K Thomas (North Bristol NHS Trust); R Campbell,  
10 J Muller, S Taylor (North Middlesex University Hospital); H Chatha (Northern  
11 General Hospital, Sheffield); R Grimwood (Northumbria Specialist Emergency  
12 Care Hospital); F Fadhlillah (Northwick Park Hospital); S Ojo (Nottingham  
13 University Hospitals Trust); A Paul, S Ramsundar (Oxford University  
14 Hospital); A Blackwell, DSD Ranasinghe (Queen Alexandra Hospital,  
15 Portsmouth); S Hall (Queen Elizabeth Hospital, Woolwich); I Traiforos (Queen  
16 Elizabeth University Hospital, Glasgow); E Walton (Royal Alexandra  
17 Children's Hospital, Brighton); T Sparkes (Royal Berkshire Hospital); L Barrett  
18 (Royal Blackburn Hospital); M Sheikh (Royal Bolton Hospital); J Driessen  
19 (Royal Cornwall Hospital); S Meredith, C Newbury (University of Derby and  
20 Burton Hospitals Trust); H Grimsmo-Powney, H Malik (Royal Devon and  
21 Exeter Hospital); L Gwatkin (Royal Gwent Hospital); R Blackburn, L  
22 McKechnie (Royal Hospital for Children, Glasgow); J Browning (Royal  
23 Hospital for Sick Children, Edinburgh); F Gillies (Royal Infirmery of  
24 Edinburgh); TF McLoughlin (Royal Liverpool University Hospital); SM Rahman  
25 (Royal London Hospital); K Hopping (Royal Manchester Children's Hospital);  
26 M Broyde (Royal Oldham Hospital); K Challen, M Macdonald (Royal Preston  
27 Hospital); A Randle (Royal Shrewsbury Hospital); E Timony-Nolan (Royal  
28 Sussex County Hospital, Brighton); H Fairbairn (Royal United Hospital, Bath);  
29 G Gracey (Royal Victoria Hospital, Belfast); K Clayton, J Thompson (Royal  
30 Victoria Infirmery Hospital, Newcastle); C Kennedy (Salford Royal Hospital); S  
31 Gray (Salisbury NHS Foundation Trust); C Magee (Sandwell General  
32 Hospital, Birmingham); G Hartshorne (Sheffield Children's Hospital); J Foley  
33 (Sligo University Hospital, Republic of Ireland); S Gardner, S Pintus, K Scott  
34 (Southport & Ormskirk Hospital); K Brammer, A Raghunathan (St Georges  
35 Hospital, Tooting); S Langston (St Helen's and Knowsley NHS Trust); F Gillies  
36 (St John's Hospital, Livingston); J Patel (St Marys Hospital, London); A Knight

1  
2  
3 554 (St Richards Hospital, Chichester); S Saunder, C Thomas (St Thomas'  
4 Hospital, London); C Szekeres (Surrey and Sussex NHS Trust); P Fitzpatrick  
5 555  
6 556 (Temple Street Children's Hospital); L Kehler (The Royal Wolverhampton  
7 NHS Trust); H Cooper (Tunbridge Wells Hospital); B O'Hare (Ulster Hospital);  
8 557  
9 558 A Arumugam, C Leech (University Hospitals Coventry and Warwickshire NHS  
10 Trust); Y Moulds, DL Thom (University Hospital Crosshouse); N Ali (University  
11 559  
12 Hospital Lewisham, London); A Mackay (University Hospital Monklands); J  
13 560  
14 Norton (University Hospital of North Midlands); E Frost, R Wright (University  
15 561  
16 Hospital Southampton); CE Davies, A Hanks, E Murray (University Hospital of  
17 562  
18 Wales); A Saunders (Victoria Hospital, Kirkcaldy); KI Malik (West Suffolk  
19 563  
20 Hospital); IMV Asif (West Middlesex Hospital); S Manouchehri (Wexham Park  
21 564  
22 Hospital); A Fatkin, S Lewis (Whiston Hospital); S Naeem (William Harvey  
23 565  
24 Hospital, Ashford); A Basu (Wrexham Maelor Hospital); N Cherian, O Hill  
25 566  
26 (Wythenshawe Hospital, Manchester); C Boulind (Yeovil District Hospital); P  
27 567  
28 Williams (Ysbyty Gwynedd Hospital)  
29 568  
30 569

### 31 **Data collectors**

32 570  
33 571  
34 572 S Hardwick, C Gandolfi (Addenbrooke's Hospital, Cambridge); E  
35 573  
36 Everitt (Aintree Hospital, Liverpool); R Hughes (Betsi Cadwaladr University  
37 574  
38 Hospital); E Williams (Bristol Royal Hospital for Children), A Ghosh  
39 575  
40 (Colchester Hospital); G Hampton, D McKeever, D Purdy, L Savage  
41 576  
42 (Craigavon Area Hospital); S Bailey (Derriford Hospital, Plymouth); J Leung  
43 577  
44 (East Kent Hospitals); L Brown, P Harris, R Sharr (East Surrey Hospital); R  
45 578  
46 Loffhagen (Gloucestershire Hospitals Foundation Trust); V Rivers (Ipswich  
47 579  
48 Hospital); HD Khan, K Vincent (Leicester Royal Infirmary), H  
49 580  
50 Baird (Manchester University NHS Foundation Trust); J Foot (Musgrove Park  
51 581  
52 Hospital, Taunton); S Bury, E Grocholski, G Kamalatharan (Northwick Park  
53 582  
54 Hospital); MU Khan (Nottingham University Hospitals Trust); J Gaiawyn  
55 583  
56 (Royal Cornwall Hospital); G Johnson, A Tabner (University of Derby and  
57 584  
58 Burton Hospitals Trust); L Abraham (Royal Devon and Exeter Hospital); N  
59 585  
60 Sexton (Royal Liverpool University Hospital); A Akhtar (Royal Victoria  
Hospital, Belfast); C de Buitelir (Sligo University Hospital, Republic of Ireland);  
B Clarke, M Colmar (St John's Hospital, Livingston); Z Haslam, M Morrison

1  
2  
3 588 (Southport & Ormskirk NHS Trust); K Veermuthu (Surrey and Sussex  
4 589 Healthcare Trust); D Raffo, J Stafford (Ulster Hospital, Belfast); S McIntock  
5 590 (University Hospitals Coventry and Warwickshire NHS Trust); R Bond, OR  
6 591 Griffiths, B McIlwham (University Hospital Wales); K Cunningham (Victoria  
7 592 Hospital, Kirkcaldy); E Clegg (Wythenshawe Hospital)  
8  
9  
10  
11  
12 593  
13  
14 594  
15

## 16 595 REFERENCES

- 17 596  
18  
19  
20 597 1 The King's Fund. The health care workforce in England: Make or  
21 598 Break? 2018. [https://www.kingsfund.org.uk/publications/health-care-](https://www.kingsfund.org.uk/publications/health-care-workforce-england)  
22 599 [workforce-england](https://www.kingsfund.org.uk/publications/health-care-workforce-england) (accessed 27 May 2020).  
23  
24  
25 600 2 UK-wide review of doctors and medical students wellbeing - GMC.  
26 601 2019. [https://www.gmc-uk.org/about/how-we-work/corporate-strategy-](https://www.gmc-uk.org/about/how-we-work/corporate-strategy-plans-and-impact/supporting-a-profession-under-pressure/uk-wide-review-of-doctors-and-medical-students-wellbeing)  
27 602 [plans-and-impact/supporting-a-profession-under-pressure/uk-wide-](https://www.gmc-uk.org/about/how-we-work/corporate-strategy-plans-and-impact/supporting-a-profession-under-pressure/uk-wide-review-of-doctors-and-medical-students-wellbeing)  
28 603 [review-of-doctors-and-medical-students-wellbeing](https://www.gmc-uk.org/about/how-we-work/corporate-strategy-plans-and-impact/supporting-a-profession-under-pressure/uk-wide-review-of-doctors-and-medical-students-wellbeing) (accessed 27 May  
29 604 2020).  
30  
31  
32  
33 605 3 Ramirez AJ, Graham J, Richards MA, *et al.* Mental health of hospital  
34 606 consultants: The effects of stress and satisfaction at work. *Lancet*  
35 607 1996;347:724–8. doi:10.1016/S0140-6736(96)90077-X  
36  
37  
38 608 4 Salen P, Norman K. The Impact of Fatigue on Medical Error and  
39 609 Clinician Wellness: A Vignette-Based Discussion. In: *Vignettes in*  
40 610 *Patient Safety - Volume 2*. 2018. doi:10.5772/intechopen.70712  
41  
42  
43  
44 611 5 Arora M, Asha S, Chinnappa J, *et al.* Review article: Burnout in  
45 612 emergency medicine physicians. *Emerg Med Australas* 2013;25:491–5.  
46 613 doi:10.1111/1742-6723.12135  
47  
48  
49 614 6 Han S, Shanafelt TD, Sinsky CA, *et al.* Estimating the attributable cost  
50 615 of physician burnout in the United States. *Ann Intern Med* Published  
51 616 Online First: 2019. doi:10.7326/M18-1422  
52  
53  
54 617 7 Rotenstein LS, Torre M, Ramos MA, *et al.* Prevalence of burnout  
55 618 among physicians a systematic review. *JAMA* 2018;320:1131–50.  
56 619 doi:10.1001/jama.2018.12777  
57  
58  
59 620 8 Shanafelt TD, Hasan O, Dyrbye LN, *et al.* Changes in Burnout and  
60

- 1  
2  
3 621 Satisfaction with Work-Life Balance in Physicians and the General US  
4  
5 622 Working Population between 2011 and 2014. *Mayo Clin Proc*  
6  
7 623 2015;**90**:1600–13. doi:10.1016/j.mayocp.2015.08.023  
8  
9 624 9 The Lancet T. Physician burnout: a global crisis. *Lancet* 2019;394:93.  
10 625 doi:10.1016/S0140-6736(19)31573-9  
11  
12 626 10 West CP, Dyrbye LN, Erwin PJ, *et al*. Interventions to prevent and  
13  
14 627 reduce physician burnout: a systematic review and meta-analysis.  
15 628 *Lancet* 2016;388:2272–81. doi:10.1016/S0140-6736(16)31279-X  
16  
17 629 11 Sluiter JK, De Croon EM, Meijman TF, *et al*. Need for recovery from  
18  
19 630 work related fatigue and its role in the development and prediction of  
20  
21 631 subjective health complaints. *Occup Environ Med* Published Online  
22  
23 632 First: 2003. doi:10.1136/oem.60.suppl\_1.i62  
24  
25 633 12 Sluiter JK, Frings-Dresen MH, van der Beek AJ, *et al*. The relation  
26  
27 634 between work-induced neuroendocrine reactivity and recovery,  
28  
29 635 subjective need for recovery, and health status. *J Psychosom Res*  
30  
31 636 2001;**50**:29–37. doi:10.1016/s0022-3999(00)00213-0  
32  
33 637 13 GMC. General Medical Council. National training surveys 2019: Initial  
34  
35 638 findings report. 2019. [https://www.gmc-uk.org/-/media/gmc-site-](https://www.gmc-uk.org/-/media/gmc-site-images/about/national-training-surveys-initial-findings-report-20190705_2.pdf?la=en&hash=8455783A3C4DE2CC55A38ACB9ACF5D0B391744B0)  
36  
37 639 [images/about/national-training-surveys-initial-findings-report-](https://www.gmc-uk.org/-/media/gmc-site-images/about/national-training-surveys-initial-findings-report-20190705_2.pdf?la=en&hash=8455783A3C4DE2CC55A38ACB9ACF5D0B391744B0)  
38  
39 640 [20190705\\_2.pdf?la=en&hash=8455783A3C4DE2CC55A38ACB9ACF5](https://www.gmc-uk.org/-/media/gmc-site-images/about/national-training-surveys-initial-findings-report-20190705_2.pdf?la=en&hash=8455783A3C4DE2CC55A38ACB9ACF5D0B391744B0)  
40  
41 641 [D0B391744B0](https://www.gmc-uk.org/-/media/gmc-site-images/about/national-training-surveys-initial-findings-report-20190705_2.pdf?la=en&hash=8455783A3C4DE2CC55A38ACB9ACF5D0B391744B0) (accessed 27 May 2020).  
42  
43 642 14 Panagioti M, Panagopoulou E, Bower P, *et al*. Controlled interventions  
44  
45 643 to reduce burnout in physicians a systematic review and meta-analysis.  
46  
47 644 *JAMA Intern Med* 2017;177:195–205.  
48  
49 645 doi:10.1001/jamainternmed.2016.7674  
50  
51 646 15 Dewa CS, Jacobs P, Thanh NX, *et al*. An estimate of the cost of burnout  
52  
53 647 on early retirement and reduction in clinical hours of practicing  
54  
55 648 physicians in Canada. *BMC Health Serv Res* 2014;14.  
56  
57 649 doi:10.1186/1472-6963-14-254  
58  
59 650 16 National Academies of Sciences E and M. *Taking Action Against*  
60  
651 *Clinician Burnout*. Washington, D.C. National Academies Press 2019.  
652  
653 652 doi:10.17226/25521  
654  
655 653 17 Sluiter JK, Van Der Beek AJ, Frings-Dresen MHW. The influence of  
656  
657 654 work characteristics on the need for recovery and experienced health: A

- 1  
2  
3 655 study on coach drivers. *Ergonomics* 1999;42:573–83.  
4  
5 656 doi:10.1080/001401399185487  
6  
7 657 18 Jansen NWH, Kant I, Van Amelsvoort LGPM, *et al.* Need for recovery  
8  
9 658 from work: Evaluating short-term effects of working hours, patterns and  
10  
11 659 schedules. *Ergonomics* Published Online First: 2003.  
12  
13 660 doi:10.1080/0014013031000085662  
14  
15 661 19 Smith J, Keating L, Flowerdew L, *et al.* An Emergency Medicine  
16  
17 662 Research Priority Setting Partnership to establish the top 10 research  
18  
19 663 priorities in emergency medicine. *Emerg Med J* Published Online First:  
20  
21 664 2017. doi:10.1136/emered-2017-206702  
22  
23 665 20 Eysenbach G. Improving the Quality of Web Surveys: The Checklist for  
24  
25 666 Reporting Results of Internet E-Surveys (CHERRIES). *J Med Internet*  
26  
27 667 *Res* 2004;6:e34. doi:10.2196/jmir.6.3.e34  
28  
29 668 21 Medicine RC of E. Essential Facts Regarding A&E Services.  
30  
31 669 2018. [https://www.rcem.ac.uk/docs/Policy/England Factsheet 2018.pdf](https://www.rcem.ac.uk/docs/Policy/England_Factsheet_2018.pdf)  
32  
33 670 (accessed 27 May 2020).  
34  
35 671 22 Cottey L, Vassallo J, Roberts T, Horner D, Tabner A. About TERN? -  
36  
37 672 RCEMLearning. <https://www.rcemlearning.co.uk/foamed/about-tern/>  
38  
39 673 (accessed 27 May 2020)  
40  
41 674 23 Lyttle MD, O'Sullivan R, Hartshorn S, *et al.* Pediatric Emergency  
42  
43 675 Research in the UK and Ireland (PERUKI): Developing a collaborative  
44  
45 676 for multicentre research. *Arch Dis Child* 2014;99:602–3.  
46  
47 677 doi:10.1136/archdischild-2013-304998  
48  
49 678 24 Van Veldhoven M, Meijman TF. *Het meten van psychosociale*  
50  
51 679 *arbeidsbelasting met een vragenlijst: De Vragenlijst Beleving en*  
52  
53 680 *Beoordeling van de Arbeid (VBBA). [Questionnaire on Perception and*  
54  
55 681 *Judgement of Work]*. 1994.  
56  
57 682 25 Van Veldhoven M, Broersen S. Measurement quality and validity of the  
58  
59 683 “need for recovery scale”. *Occup Environ Med* Published Online First:  
60  
684 2003. doi:10.1136/oem.60.suppl\_1.i3  
685 26 Graham B, Cottey L, Smith J, *et al.* Measuring ‘Need for Recovery’ as  
686  
687 an indicator of staff wellbeing in the Emergency Department—a survey  
688 27 Harris PA, Taylor R, Minor BL, *et al.* The REDCap consortium: Building

- 1  
2  
3 689 an international community of software platform partners. *J Biomed*  
4 690 *Inform* 2019;95:103208. doi:10.1016/J.JBI.2019.103208
- 5  
6 691 28 Harris PA, Taylor R, Thielke R, *et al.* Research electronic data capture  
7 692 (REDCap)—A metadata-driven methodology and workflow process for  
8 693 providing translational research informatics support. *J Biomed Inform*  
9 694 2009;42:377–81. doi:10.1016/J.JBI.2008.08.010
- 10  
11 695 29 StataCorp. Stata Statistical Software: Release 14. College Station, TX:  
12 696 StataCorp LP. 2015. 2015. doi:10.2307/2234838
- 13  
14 697 30 Van Der Starre RE, Coffeng JK, Hendriksen IJ, *et al.* Associations  
15 698 between overweight, obesity, health measures and need for recovery in  
16 699 office employees: A cross-sectional analysis. *BMC Public Health*  
17 700 Published Online First: 2013. doi:10.1186/1471-2458-13-1207
- 18  
19 701 31 Moriguchi CS, Trevizani T, De Fátima Carreira Moreira R, *et al.* Need  
20 702 for recovery assessment among nursing professionals and call center  
21 703 operators. In: *Work*. 2012. 4838–42. doi:10.3233/WOR-2012-0773-4838
- 22  
23 704 32 Nieuwenhuijsen K, Sluiter JK, Dewa CS. Need for recovery as an early  
24 705 sign of depression risk in a working population. *J Occup Environ Med*  
25 706 Published Online First: 2016. doi:10.1097/JOM.0000000000000866
- 26  
27 707 33 Samadi H, Kalantari R, Mostafavi F, *et al.* Using the Need for Recovery  
28 708 Scale to Assess Workload in Mine Workers and Its Relationship With  
29 709 Demographics. *J Ergon* 2017;4:1–7. doi:10.21859/joe-04041
- 30  
31 710 34 Bridger RS, Brasher K, Dew A. Work demands and need for recovery  
32 711 from work in ageing seafarers. *Ergonomics* 2010;53:1006–15.  
33 712 doi:10.1080/00140139.2010.493958
- 34  
35 713 35 De Croon EM, Sluiter JK, Frings-Dresen MHW. Need for recovery after  
36 714 work predicts sickness absence: A 2-year prospective cohort study in  
37 715 truck drivers. *J Psychosom Res* 2003;55:331–9. doi:10.1016/S0022-  
38 716 3999(02)00630-X
- 39  
40 717 36 Hall LH, Johnson J, Heyhoe J, *et al.* Strategies to improve general  
41 718 practitioner well-being: Findings from a focus group study. *Fam Pract*  
42 719 Published Online First: 2018. doi:10.1093/fampra/cmz130
- 43  
44 720 37 Galletta M, Portoghese I, Fabbri D, *et al.* Empowering workplace and  
45 721 wellbeing among healthcare professionals: The buffering role of job  
46 722 control. *Acta Biomed* 2016;87:61–9.



- 1  
2  
3 723 38 NHS Improvement. Annualised hours rotas for emergency department  
4 724 doctors. 2019.  
5  
6 725 [https://improvement.nhs.uk/documents/5919/Brighton\\_\\_Sussex\\_-](https://improvement.nhs.uk/documents/5919/Brighton__Sussex_-_annualised_hours_rotas.pdf)  
7  
8 726 [\\_annualised\\_hours\\_rotas.pdf](https://improvement.nhs.uk/documents/5919/Brighton__Sussex_-_annualised_hours_rotas.pdf) (accessed 27 May 2020).  
9  
10 727 39 Rimmer A. Government commits £10m to doctors' rest facilities. *BMJ*  
11 728 2233 doi: <http://doi.org/10.1136/bmj.l2233>  
12  
13 729 40 Smith E, Dasan S. A system under pressure. *Br J Hosp Med*  
14 730 2018;79:495–9. doi:10.12968/hmed.2018.79.9.495  
15  
16  
17 731 41 Winwood PC, Winefield AH, Lushington K. Work-related fatigue and  
18 732 recovery: The contribution of age, domestic responsibilities and  
19 733 shiftwork. *J Adv Nurs* 2006;56:438–49. doi:10.1111/j.1365-  
20 734 2648.2006.04011.x  
21  
22  
23 735 42 Hassan T, Walker B, Harrison M, *et al*.  
24 736 [www.rcem.ac.uk/docs/Policy/CEM7461-Stretched-to-the-limit-](http://www.rcem.ac.uk/docs/Policy/CEM7461-Stretched-to-the-limit-October_2013.pdf)  
25 737 [October\\_2013.pdf](http://www.rcem.ac.uk/docs/Policy/CEM7461-Stretched-to-the-limit-October_2013.pdf). 2013.[www.rcem.ac.uk/docs/Policy/CEM7461-](http://www.rcem.ac.uk/docs/Policy/CEM7461-Stretched-to-the-limit-October_2013.pdf)  
26 738 [Stretched-to-the-limit-October\\_2013.pdf](http://www.rcem.ac.uk/docs/Policy/CEM7461-Stretched-to-the-limit-October_2013.pdf) (accessed 27 Ma7 2020).  
27  
28  
29 739 43 Dykema J, Jones NR, Piché T, *et al*. Surveying Clinicians by Web:  
30 740 Current Issues in Design and Administration. *Eval Heal Prof* Published  
31 741 Online First: 2013;36:352-81. doi:10.1177/0163278713496630  
32  
33  
34 742 44 Klabunde CN, Willis GB, McLeod CC, *et al*. Improving the Quality of  
35 743 Surveys of Physicians and Medical Groups: A Research Agenda. *Eval*  
36 744 *Heal Prof* 2012;35:477-506 doi:10.1177/0163278712458283  
37  
38  
39 745  
40 746  
41 747  
42 748  
43 749  
44 750  
45 751  
46 752  
47 753  
48 754  
49 755  
50 756  
51  
52  
53  
54  
55  
56  
57  
58  
59  
60

757

758 Research Checklist: The Checklist for Reporting Results of Internet E-Surveys  
759 (CHERRIES)

760

| <b>CHERRIES CHECKLIST ADAPTED FROM:</b>                                                                                                                                                                                            |                                  |                                                                                                                                                                                                                                                                                                     |                                                                      |
|------------------------------------------------------------------------------------------------------------------------------------------------------------------------------------------------------------------------------------|----------------------------------|-----------------------------------------------------------------------------------------------------------------------------------------------------------------------------------------------------------------------------------------------------------------------------------------------------|----------------------------------------------------------------------|
| Eysenbach, Gunther. "Improving the quality of Web surveys: the Checklist for Reporting Results of Internet E-Surveys (CHERRIES)." <i>Journal of medical Internet research</i> vol. 6,3 e34. 29 Sep. 2004, doi:10.2196/jmir.6.3.e34 |                                  |                                                                                                                                                                                                                                                                                                     |                                                                      |
| <b>Item Category</b>                                                                                                                                                                                                               | <b>Checklist Item</b>            | <b>Explanation</b>                                                                                                                                                                                                                                                                                  | <b>Checklist Response</b>                                            |
| <b>Design</b>                                                                                                                                                                                                                      | Describe survey design           | Describe target population, sample frame. Is the sample a convenience sample? (In "open" surveys this is most likely.)                                                                                                                                                                              | <b>Outlined in 'Methods'</b>                                         |
| <b>IRB (Institutional Review Board) approval and informed consent process</b>                                                                                                                                                      | IRB approval                     | Mention whether the study has been approved by an IRB.                                                                                                                                                                                                                                              | <b>Outlined in 'Ethics Approval'</b>                                 |
|                                                                                                                                                                                                                                    | Informed consent                 | Describe the informed consent process. Where were the participants told the length of time of the survey, which data were stored and where and for how long, who the investigator was, and the purpose of the study?                                                                                | <b>Outlined in Survey Distribution, monitoring and recruitment</b>   |
|                                                                                                                                                                                                                                    | Data protection                  | If any personal information was collected or stored, describe what mechanisms were used to protect unauthorized access.                                                                                                                                                                             | <b>Outlined in Survey Distribution, monitoring and recruitment</b>   |
| <b>Development and pre-testing</b>                                                                                                                                                                                                 | Development and testing          | State how the survey was developed, including whether the usability and technical functionality of the electronic questionnaire had been tested before fielding the questionnaire.                                                                                                                  | <b>Outlined in 'Survey Development'</b>                              |
| <b>Recruitment process and description of the sample having access to the questionnaire</b>                                                                                                                                        | Open survey versus closed survey | An "open survey" is a survey open for each visitor of a site, while a closed survey is only open to a sample which the investigator knows (password-protected survey).                                                                                                                              | <b>Outlined in Survey Distribution, monitoring and recruitment</b>   |
|                                                                                                                                                                                                                                    | Contact mode                     | Indicate whether or not the initial contact with the potential participants was made on the Internet. (Investigators may also send out questionnaires by mail and allow for Web-based data entry.)                                                                                                  | <b>Outlined in 'Survey Distribution, monitoring and recruitment'</b> |
|                                                                                                                                                                                                                                    | Advertising the survey           | How/where was the survey announced or advertised? Some examples are offline media (newspapers), or online (mailing lists – If yes, which ones?) or banner ads (Where were these banner ads posted and what did they look like?). It is important to know the wording of the announcement as it will | <b>Outlined in 'Survey Distribution, monitoring and recruitment'</b> |

|                              |                                          |                                                                                                                                                                                                                                                                                                                                                                                                                                              |                                                                             |
|------------------------------|------------------------------------------|----------------------------------------------------------------------------------------------------------------------------------------------------------------------------------------------------------------------------------------------------------------------------------------------------------------------------------------------------------------------------------------------------------------------------------------------|-----------------------------------------------------------------------------|
|                              |                                          | heavily influence who chooses to participate. Ideally the survey announcement should be published as an appendix.                                                                                                                                                                                                                                                                                                                            |                                                                             |
| <b>Survey administration</b> | Web/E-mail                               | State the type of e-survey (eg, one posted on a Web site, or one sent out through e-mail). If it is an e-mail survey, were the responses entered manually into a database, or was there an automatic method for capturing responses?                                                                                                                                                                                                         | <b><i>Outlined in 'Survey Distribution, monitoring and recruitment'</i></b> |
|                              | Context                                  | Describe the Web site (for mailing list/newsgroup) in which the survey was posted. What is the Web site about, who is visiting it, what are visitors normally looking for? Discuss to what degree the content of the Web site could pre-select the sample or influence the results. For example, a survey about vaccination on a anti-immunization Web site will have different results from a Web survey conducted on a government Web site | <b><i>Outlined in 'Design'</i></b>                                          |
|                              | Mandatory/voluntary                      | Was it a mandatory survey to be filled in by every visitor who wanted to enter the Web site, or was it a voluntary survey?                                                                                                                                                                                                                                                                                                                   | <b><i>Outlined in 'Survey Distribution, monitoring and recruitment'</i></b> |
|                              | Incentives                               | Were any incentives offered (eg, monetary, prizes, or non-monetary incentives such as an offer to provide the survey results)?                                                                                                                                                                                                                                                                                                               | <b>No</b>                                                                   |
|                              | Time/Date                                | In what timeframe were the data collected?                                                                                                                                                                                                                                                                                                                                                                                                   | <b><i>Outlined in 'Sites and settings'</i></b>                              |
|                              | Randomization of items or questionnaires | To prevent biases items can be randomized or alternated.                                                                                                                                                                                                                                                                                                                                                                                     | <b><i>Not done</i></b>                                                      |
|                              | Adaptive questioning                     | Use adaptive questioning (certain items, or only conditionally displayed based on responses to other items) to reduce number and complexity of the questions                                                                                                                                                                                                                                                                                 | <b><i>Outlined in Survey Distribution, monitoring and recruitment</i></b>   |
|                              | Number of Items                          | What was the number of questionnaire items per page? The number of items is an important factor for the completion rate.                                                                                                                                                                                                                                                                                                                     | <b><i>Outlined in 'Design'</i></b>                                          |
|                              | Number of screens (pages)                | Over how many pages was the questionnaire distributed? The number of items is an important factor for the completion rate.                                                                                                                                                                                                                                                                                                                   | <b><i>Outlined in 'Design'</i></b>                                          |
|                              | Completeness check                       | It is technically possible to do consistency or completeness checks before the questionnaire is submitted. Was this done, and if "yes", how (usually JavaScript)? An alternative is to check for completeness after the questionnaire has been submitted (and                                                                                                                                                                                | <b><i>Not done</i></b>                                                      |

|                                                             |                                                                                                           |                                                                                                                                                                                                                                                                                                                                                                                                                                                                                                                                |                                                                    |
|-------------------------------------------------------------|-----------------------------------------------------------------------------------------------------------|--------------------------------------------------------------------------------------------------------------------------------------------------------------------------------------------------------------------------------------------------------------------------------------------------------------------------------------------------------------------------------------------------------------------------------------------------------------------------------------------------------------------------------|--------------------------------------------------------------------|
|                                                             |                                                                                                           | highlight mandatory items). If this has been done, it should be reported. All items should provide a non-response option such as “not applicable” or “rather not say”, and selection of one response option should be enforced.                                                                                                                                                                                                                                                                                                |                                                                    |
|                                                             | Review step                                                                                               | State whether respondents were able to review and change their answers (eg, through a Back button or a Review step which displays a summary of the responses and asks the respondents if they are correct).                                                                                                                                                                                                                                                                                                                    | <b>Outlined in Survey Distribution, monitoring and recruitment</b> |
| <b>Response rates</b>                                       |                                                                                                           |                                                                                                                                                                                                                                                                                                                                                                                                                                                                                                                                |                                                                    |
|                                                             | Unique site visitor                                                                                       | If you provide view rates or participation rates, you need to define how you determined a unique visitor. There are different techniques available, based on IP addresses or cookies or both.                                                                                                                                                                                                                                                                                                                                  | <b>Outlined in ‘Results’</b>                                       |
|                                                             | View rate (Ratio of unique survey visitors/unique site visitors)                                          | Requires counting unique visitors to the first page of the survey, divided by the number of unique site visitors (not page views!). It is not unusual to have view rates of less than 0.1 % if the survey is voluntary                                                                                                                                                                                                                                                                                                         | <b>Survey site contains first page of survey therefore N/A</b>     |
|                                                             | Participation rate (Ratio of unique visitors who agreed to participate/unique first survey page visitors) | Count the unique number of people who filled in the first survey page (or agreed to participate, for example by checking a checkbox), divided by visitors who visit the first page of the survey (or the informed consents page, if present). This can also be called “recruitment” rate.                                                                                                                                                                                                                                      | <b>Outlined in ‘Results’</b>                                       |
|                                                             | Completion rate (Ratio of users who finished the survey/users who agreed to participate)                  | The number of people submitting the last questionnaire page, divided by the number of people who agreed to participate (or submitted the first survey page). This is only relevant if there is a separate “informed consent” page or if the survey goes over several pages. This is a measure for attrition. Note that “completion” can involve leaving questionnaire items blank. This is not a measure for how completely questionnaires were filled in. (If you need a measure for this, use the word “completeness rate”.) | <b>Outlined in ‘Results’</b>                                       |
| <b>Preventing multiple entries from the same individual</b> | Cookies used                                                                                              | Indicate whether cookies were used to assign a unique user identifier to each client computer. If so, mention the page on which the cookie was set and read, and how long the cookie was valid. Were duplicate entries avoided by preventing users access to the survey twice; or were duplicate database entries having the same user ID eliminated before analysis? In the latter case, which entries were kept for analysis (eg, the first entry or the most recent)?                                                       | <b>Not used</b>                                                    |

|                 |                                                     |                                                                                                                                                                                                                                                                                                                                                                                                                                                                                                                                                                            |                                                                                     |
|-----------------|-----------------------------------------------------|----------------------------------------------------------------------------------------------------------------------------------------------------------------------------------------------------------------------------------------------------------------------------------------------------------------------------------------------------------------------------------------------------------------------------------------------------------------------------------------------------------------------------------------------------------------------------|-------------------------------------------------------------------------------------|
|                 | IP check                                            | Indicate whether the IP address of the client computer was used to identify potential duplicate entries from the same user. If so, mention the period of time for which no two entries from the same IP address were allowed (eg, 24 hours). Were duplicate entries avoided by preventing users with the same IP address access to the survey twice; or were duplicate database entries having the same IP address within a given period of time eliminated before analysis? If the latter, which entries were kept for analysis (eg, the first entry or the most recent)? | <b>Not used due to survey being completed on multi-user/single log-in computers</b> |
|                 | Log file analysis                                   | Indicate whether other techniques to analyze the log file for identification of multiple entries were used. If so, please describe.                                                                                                                                                                                                                                                                                                                                                                                                                                        | <b>Not done</b>                                                                     |
|                 | Registration                                        | In “closed” (non-open) surveys, users need to login first and it is easier to prevent duplicate entries from the same user. Describe how this was done. For example, was the survey never displayed a second time once the user had filled it in, or was the username stored together with the survey results and later eliminated? If the latter, which entries were kept for analysis (eg, the first entry or the most recent)?                                                                                                                                          | <b>N/A</b>                                                                          |
| <b>Analysis</b> | Handling of incomplete questionnaires               | Were only completed questionnaires analyzed? Were questionnaires which terminated early (where, for example, users did not go through all questionnaire pages) also analyzed?                                                                                                                                                                                                                                                                                                                                                                                              | <b>Outlined in ‘Data Analysis’</b>                                                  |
|                 | Questionnaires submitted with an atypical timestamp | Some investigators may measure the time people needed to fill in a questionnaire and exclude questionnaires that were submitted too soon. Specify the timeframe that was used as a cut-off point, and describe how this point was determined                                                                                                                                                                                                                                                                                                                               | <b>N/A</b>                                                                          |
|                 | Statistical correction                              | Indicate whether any methods such as weighting of items or propensity scores have been used to adjust for the non-representative sample; if so, please describe the methods.                                                                                                                                                                                                                                                                                                                                                                                               | <b>Outlined in ‘Data Analysis’</b>                                                  |

761  
762  
763  
764  
765  
766  
767  
768

1  
2  
3 769

4  
5 770 **Figure Legend**

6 771

7  
8 772 **Figure 1**

9 773 Box plots of Need for Recovery (NFR) score by participant demographic  
10 774 characteristics, excluding any participants who does not respond to the  
11 775 question (i.e. missing).

12  
13  
14 776 Plot a) age group in years; b) gender; c) clinical grade; d) any long-term  
15 777 health condition or disability.

16  
17 778

18  
19  
20 779 ST1-ST2=Specialist Training year 1-2 (this included physicians training in  
21 780 Anaesthetics, Emergency Medicine, Acute Medicine and General Practice)

22  
23 781 SASG=Staff grade, associate specialist and speciality grade

24  
25 782 GP=General Practitioner working within the emergency department (ED)

26  
27 783

28  
29 784 **Figure 2**

30 785 Box plot of Need for Recovery (NFR) score by participant's occupational  
31 786 characteristics, excluding any participants who does not respond to the  
32 787 question (i.e. missing).

33  
34  
35 788 Plot a) ability to obtain study leave when requested; b) ability to obtain annual  
36 789 leave when requested; c) proportion of time working out of hours; d) working  
37 790 in paediatrics emergency departments (ED) only.

38  
39  
40  
41 791

1  
2  
3  
4  
5  
6  
7  
8  
9  
10  
11  
12  
13  
14  
15  
16  
17  
18  
19  
20  
21  
22  
23  
24  
25  
26  
27  
28  
29  
30  
31  
32  
33  
34  
35  
36  
37  
38  
39  
40  
41  
42  
43  
44  
45  
46  
47  
48  
49  
50  
51  
52  
53  
54  
55  
56  
57  
58  
59  
60

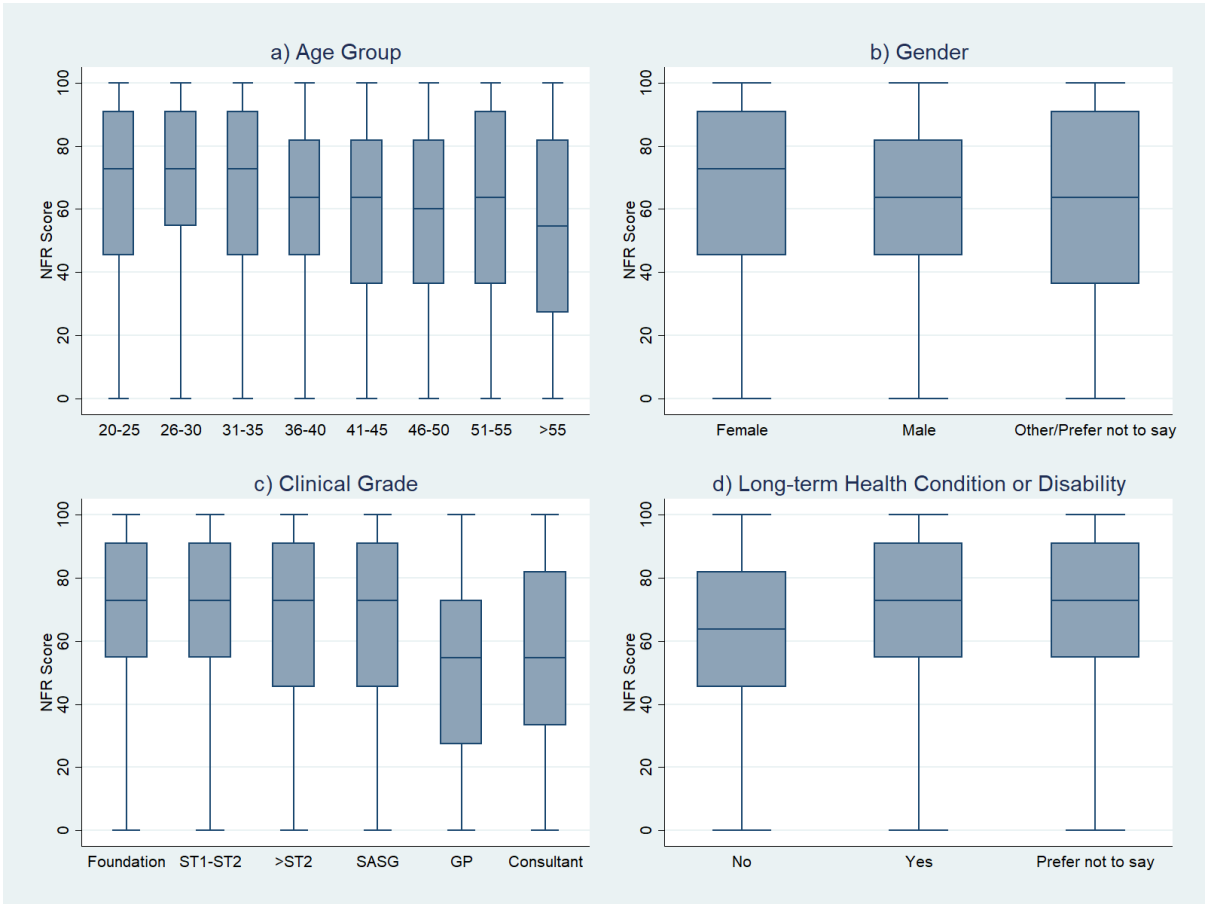

Review only

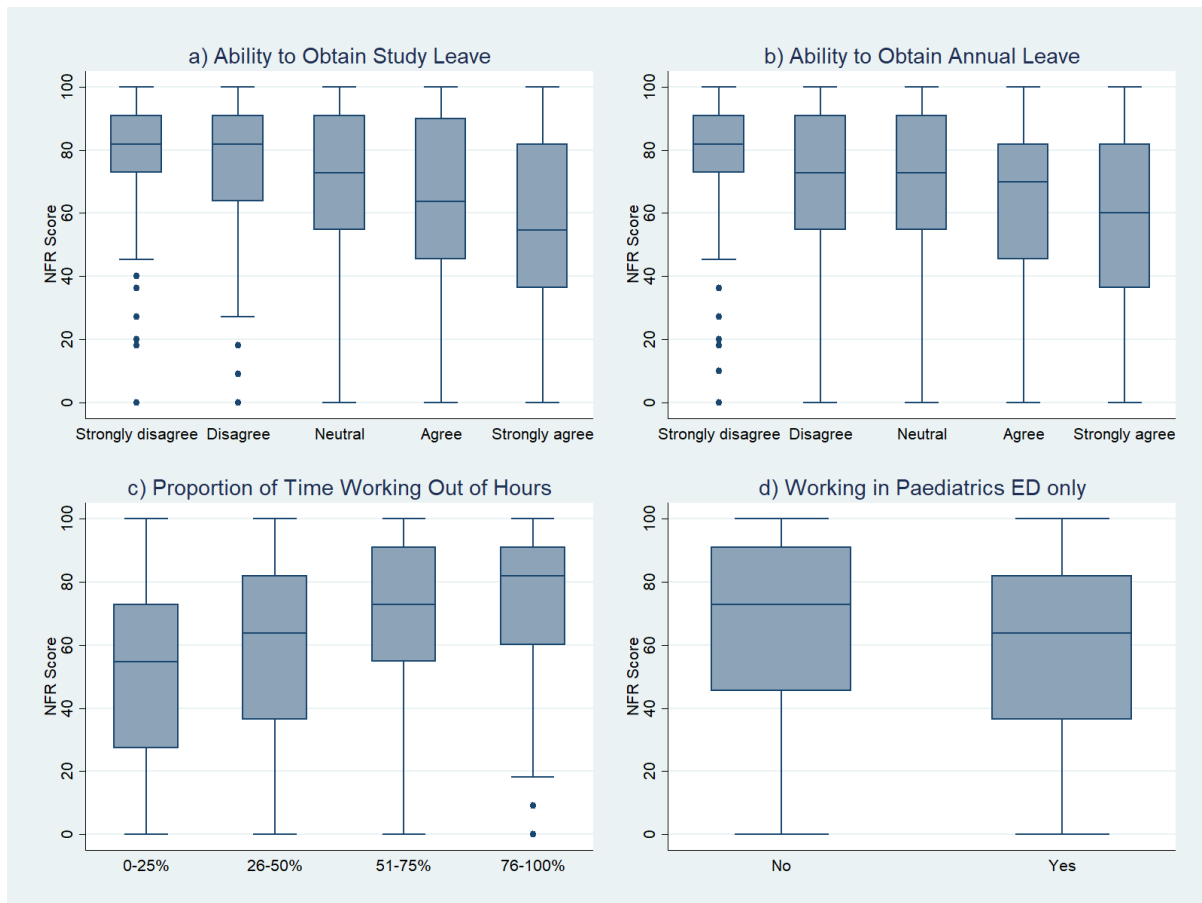

Review only



# Emergency Department Need For Recovery Survey

1  
2  
3  
4  
5  
6  
7  
8  
9  
10  
11  
12  
13  
14  
15  
16  
17  
18  
19  
20  
21  
22  
23  
24  
25  
26  
27  
28  
29  
30  
31  
32  
33  
34  
35  
36  
37  
38  
39  
40  
41  
42  
43  
44  
45  
46  
47  
48  
49  
50  
51  
52  
53  
54  
55  
56  
57  
58  
59  
60

---

Do you want to read the patient participation leaflet, GDPR and consent information now?

- Yes
- No

For peer review only

---

1 Participant Information Sheet

2  
3 Welcome to the 2019 TERN Need for Recovery Survey.

---

4  
5 This is an electronic participant information sheet.  
6 Please take a minute or two to read this information  
7 before proceeding with the survey.

8  
9 What is need for recovery?

10 Need for recovery is the time taken to physically and  
11 psychologically recover from work. Increased need  
12 for recovery is linked to fatigue and a range of  
13 physical and psychological health outcomes including  
14 burnout.

15 Why have I been asked to take part?

16 You are either:

- 17 • A doctor working in an emergency department which  
18 has been nominated to participate in this survey.

19 What is the purpose of the study?

20 This survey is being conducted as part of a national  
21 survey by the Trainee Emergency Research Network  
22 (TERN). The project is being led by Dr Laura Cottey  
23 (Chief Investigator) and Dr Blair Graham, with  
24 oversight from the TERN executive committee. We hope  
25 that the results from this survey will provide a  
26 baseline assessment of trainee need for recovery,  
27 and demonstrate risk factors that may indicate an  
28 increased need for recovery. It is hoped that this  
29 survey will provide insight into the phenomenon of  
30 need for recovery amongst Emergency Department  
31 doctors, show where differences exist, and how need  
32 for recovery may be reduced in the future.  
33 Ultimately it is hoped that this survey may lead to  
34 initiatives to improve the working lives of doctors  
35 in the emergency department.

36 What will happen if I take part?

37 You will be asked to take part in this electronic  
38 questionnaire. You should allocate about 5 minutes  
39 to complete the questionnaire, although you can save  
40 and return to completing the questionnaire at a  
41 later time.

42  
43 Do I have to take part?

44 In order that these results can inform future  
45 initiatives to improve working lives of emergency  
46 doctors, we do require a robust response rate.  
47 However, you are under no obligation to take part  
48 and may withdraw at any point without the need to  
49 give a reason.

50 Should you have uncertainties or queries about this  
51 survey, please do not hesitate to contact the study  
52 team.

53  
54 What will happen to my data if I withdraw my  
55 involvement?

56 If you choose to withdraw your involvement in the  
57 study, any results that you have submitted will be  
58 kept for analysis. However, you will not be required  
59 to input further into the study.

60 If you would like to be formally withdrawn from the  
study at any point, please contact the study team  
(TERN@rcem.ac.uk). You do not have to give a reason.

For peer review only - <http://bmjopen.bmj.com/site/about/guidelines.xhtml>

Are there any potential risks or benefits of taking

This survey will provide valuable insight into the wellbeing of emergency department doctors nationally. We appreciate issues such as wellbeing and burnout are sensitive. We have included some information about sources that you might wish to contact for support both as part of this introduction, and at the end of the survey.

Who is involved in this project?

The project is being led by Dr Laura Cottey (Chief Investigator) and Dr Blair Graham, with oversight from the TERN executive committee which is led by Dr Tom Roberts. The study is indirectly supported by the Royal College of Emergency Medicine, but TERN is independent from the college.

What if something goes wrong?

It is very unlikely that anything will go wrong. If you feel it does, please contact the study team directly.

How will you protect my data and confidentiality?

The University Hospitals Plymouth NHS Trust is the sponsor for this study. The sponsor will be using information in order to undertake the study and will be responsible for looking after your information and using it properly. The data collected will be kept for 10 years after the study has finished.

Your rights to access, change or move your information are limited, as we need to manage your information in specific ways in order for the research to be reliable and accurate. If you withdraw from the study, we will keep the information about you that we have already obtained. To safeguard your rights, we will use the minimum personally identifiable information possible.

This study is also compliant with the General Data Protection Regulations (GDPR). For more information about GDPR click here.

How may I contact the study team in the future?

You can contact the study team by emailing Dr Laura Cottey at [laura.cottey@nhs.net](mailto:laura.cottey@nhs.net)

What to do if you need support about wellbeing

The following organisations can help provide advice and support with regards to your wellbeing.

-Your occupational health department (contact details available via your employer)

-Your general practitioner

-BMA Counselling Service (24 Hours). Telephone 0330 123 1245. (Note that you do not have to be a member of the BMA to access this service)

-The Samaritans (24 Hours). Telephone 116 123.

You can also access further information and signposting online via the Doctors Support Network <https://www.dsn.org.uk/>

Feel free to leave any comments.

1  
2  
3  
4  
5  
6  
7  
8  
9  
10  
11  
12  
13  
14  
15  
16  
17  
18  
19  
20  
21  
22  
23  
24  
25  
26  
27  
28  
29  
30  
31  
32  
33  
34  
35  
36  
37  
38  
39  
40  
41  
42  
43  
44  
45  
46  
47  
48  
49  
50  
51  
52  
53  
54  
55  
56  
57  
58  
59  
60

---

Consent Question 1:  Yes  
I have read and understood the participant  No  
information

---

Consent Question 2:  Yes  
I understand the information about confidentiality  No  
and GDPR

For peer review only

**Demographic Characteristics**

What is your current job role?

- ST1  
 ST2  
 ST3  
 ST4  
 ST5  
 ST6  
 ST7  
 ST8  
 F1  
 F2  
 Clinical Fellow (F2-ST3 Level)  
 Clinical Fellow (>=ST4 Level)  
 Consultant  
 Associate Specialist  
 Staff Grade  
 CESR Doctor  
 GP Trainee  
 GP  
 Other (please specify)

What is your job role?

\_\_\_\_\_

Which country do you work in?

- Scotland  
 Northern Ireland  
 Wales  
 England  
 Republic of Ireland

Which hospital do you currently work in?

- Aberdeen  
 Victoria Hospital, Kirkcaldy  
 Forth Valley Royal Hospital  
 Monklands Hospital  
 Royal Hospital for Children, Glasgow  
 Royal Infirmary of Edinburgh  
 St John's, Livingston  
 NHS Greater Glasgow and Clyde - Queen Elizabeth  
 NHS Greater Glasgow and Clyde - Glasgow Royal Infirmary  
 Crosshouse, Ayrshire  
 Royal Alexandria, Paisley  
 Ayr  
 Royal Hospital for Sick Children, Edinburgh  
 Other

Which hospital do you currently work in?

- Craigavon Area Hospital, Northern Ireland  
 Royal Victoria Hospital, Belfast  
 Ulster Hospital, Belfast  
 Other

1  
2  
3  
4  
5  
6  
7  
8  
9  
10  
11  
12  
13  
14  
15  
16  
17  
18  
19  
20  
21  
22  
23  
24  
25  
26  
27  
28  
29  
30  
31  
32  
33  
34  
35  
36  
37  
38  
39  
40  
41  
42  
43  
44  
45  
46  
47  
48  
49  
50  
51  
52  
53  
54  
55  
56  
57  
58  
59  
60

---

Which hospital do you currently work in?

- Cardiff, University Hospital of Wales
- Ysbyty Gwynedd, Bangor
- Morriston Hospital, Swansea
- Wrexham, North Wales
- Other

For peer review only

1 Which hospital do you currently work in (the list is mostly alphabetically but if you cannot find your hospital please  
2 check the bottom)?  
3

- 4  Addenbrooke's Hospital  
5  Aintree  
6  Airedale General Hospital  
7  Basingstoke Emergency Department  
8  Bedford hospital emergency department  
9  Birmingham  
10  Bolton  
11  Bradford Royal Infirmary  
12  Brighton (Royal Sussex County Hospital)  
13  Bristol Childrens Hospital  
14  Bristol Royal Infirmary (Adults)  
15  Cambridge University Hospitals  
16  Chelsea & Westminster Hospital  
17  Croydon University Hospital  
18  Doncaster Royal Infirmary  
19  William Harvey ED  
20  East Surrey Hospital ED  
21  Epsom and St Helier NHS Trust  
22  Gloucestershire Hospitals NHS Foundation Trust  
23  Great Western Hospital Swindon  
24  Hampshire Hospitals NHS Trust (Basingstoke and Winchester)  
25  Harrogate Emergency Department  
26  Homerton Emergency Department  
27  Ipswich Hospital  
28  James Cook University Hospital Middlesbrough  
29  James Paget University Hospital  
30  Leeds teaching hospitals  
31  Leicester Royal Infirmary  
32  Leighton (Crewe)  
33  Lewisham university hospital  
34  Lister Hospital  
35  QEH, London  
36  Manchester Royal Infirmary  
37  Milton Keynes University  
38  Musgrove Park Hospital, Taunton  
39  Northern general hospital  
40  Northumbria Specialist Emergency Care Hospital  
41  Northwick Park Hospital  
42  Oxford University Hospital NHS Foundation Trust/  
43  Portsmouth - Queen Alexandra Hospital,  
44  Plymouth- Derriford  
45  Reading  
46  Royal Berkshire Hospital  
47  Royal Blackburn Hospital  
48  Royal Cornwall Hospital, Truro  
49  Royal Devon & Exeter Hospital  
50  Royal Liverpool University Hospital  
51  The Royal London Hospital (Paeds)  
52  The Royal London Hospital (Adults)  
53  Royal Manchester Children's Hospital  
54  Royal Oldham Hospital  
55  Royal Preston hospital  
56  Royal Shrewsbury Hospital  
57  Royal Stoke  
58  Royal Surrey County Hospital  
59  Royal United Hospital Bath  
60  Royal Victoria, Newcastle  
 Salford Royal Hospital, Manchester  
 Sheffield Childrens Hospital ED  
 Medway Foundation NHS Trust  
 Mid Cheshire Hospitals NHS Foundation Trust  
 University Hospital Southampton  
 St Helens and Knowsley  
 Southmead Hospital  
 Surrey and Sussex Healthcare NHS Trust  
 St George's Hospital Tooting

For peer review only

- 1  St Marys Hospital, London  
2  St Richards hospital  
3  St Thomas' Hospital  
4  Torbay  
5  Tunbridge Wells Hospital  
6  Southport District General Hospital  
7  University College Hospital, London  
8  University Hospital Coventry and Warwickshire  
9  Warrington  
10  University Hospitals of Derby and Burton NHS Foundation Trust  
11  Watford General hospital  
12  West Middlesex University Hospital  
13  West Suffolk Hospital  
14  Frimley Park Hospital  
15  Wexham Park Hospital, Frimley Health NHS  
16  Whiston Hospital  
17  Wythenshawe Hospital  
18  Yeovil District Hospital  
19  York District hospital  
20  York Hospital Emergency Departments  
21  Whiston Hospital  
22  William Harvey Hospital  
23  Worthing Hospital  
24  University hospital of Hull  
25  North Middlesex  
26  Sandwell and West Birmingham  
27  Stoke Mandeville  
28  Colchester  
29  Alder Hey Children's Hospital  
30  Queen's Hospital, Romford  
31  Birmingham Children's Hospital  
32  Sunderland Royal Hospital  
33  Countess of Chester NHS foundation trust  
34  University hospital of North Durham  
35  Evelina Children's Hospital  
36  King's College, London  
37  Barnstaple  
38  Nottingham University Hospital  
39  Royal Alexandra Children's Hospital  
40  Royal Wolverhampton  
41  Salisbury NHS Trust  
42  Western Sussex NHS Trust  
43  Other  
44  Alder Hey Childrens Hospital  
45  Birmingham Women's and Childrens Hospital  
46  Countess of Chester  
47  Evelina, Guys and St Thomas's  
48  Kings College Hospital  
49  Royal Alexandra Children's Hospital, Brighton and Sussex  
50  New Cross Hospital  
51  Salisbury  
52  Barking, Havering & Redbridge - Queen's  
53  Barking, Havering & Redbridge - King George  
54  South Tyneside and Sunderland NHS Trust  
55  County Durham and Darlington  
56  North Manchester General Hospital



1 Which hospital do you currently work in?  
2

- 3  University Hospital Galway
- 4  Mater Misericordiae University Hospital, Dublin,
- 5  Sligo University Hospital
- 6  Limerick regional Hospital
- 7  Other
- 8  Children's Health Ireland at Crumlin
- 9  Children's Health Ireland at Temple Street
- 10  Children's Health Ireland at Tallaght
- 11  Bon Secours Hospital
- 12  Cork University Hospital

13  
14 Please state the name of your hospital.  
15  
16  
17 \_\_\_\_\_  
18 \_\_\_\_\_

19 What type of patients do you see in your Emergency Department?  
20

- 21  Adults only
- 22  Paediatrics only
- 23  Mixture of Adults and Paediatrics

24  
25 How old are you?  
26

- 27  20-25
- 28  26-30
- 29  31-35
- 30  36-40
- 31  41-45
- 32  46-50
- 33  51-55
- 34  56-60
- 35  61- 65
- 36  66-70
- 37  >70

38  
39 What is your gender?  
40

- 41  Female
- 42  Male
- 43  Other
- 44  Prefer not to say

**Please fill out the following "Need for Recovery Score". Please base this on the LAST MONTH of work (excluding leave).**

|                                                                                                                           | yes                   | no                    |
|---------------------------------------------------------------------------------------------------------------------------|-----------------------|-----------------------|
| I find it difficult to relax at the end of the working day?                                                               | <input type="radio"/> | <input type="radio"/> |
| By the end of the working day I feel really worn-out                                                                      | <input type="radio"/> | <input type="radio"/> |
| Because of my job, at the end of the working day I feel rather exhausted                                                  | <input type="radio"/> | <input type="radio"/> |
| After my breaks, I feel fresh to continue my work                                                                         | <input type="radio"/> | <input type="radio"/> |
| Generally speaking, I only start to feel relaxed on my second non-working day off                                         | <input type="radio"/> | <input type="radio"/> |
| I find it difficult to concentrate in my free time after work                                                             | <input type="radio"/> | <input type="radio"/> |
| I find it hard to show interest in other people when I have just come home from work                                      | <input type="radio"/> | <input type="radio"/> |
| In general, it takes me over an hour to feel fully recuperated after work                                                 | <input type="radio"/> | <input type="radio"/> |
| When I get home, I need to be left in peace for a while                                                                   | <input type="radio"/> | <input type="radio"/> |
| Often, after a day's work I feel so tired that I cannot get involved in other activities                                  | <input type="radio"/> | <input type="radio"/> |
| A feeling of tiredness prevents me from doing my work as well as I normally would during the last part of the working day | <input type="radio"/> | <input type="radio"/> |

How long have you worked in your current Emergency Department?

- 1 month or less
- 1-2 months
- 2-3 months
- 3-4 months
- 4-5 months
- 5-6 months
- 6 months - 1 year
- 1-2 years
- 2-3 years
- 3-5 years
- 5 -10 years
- 10 -15 years
- 15-20 years
- > 20 years

---

1 How long have you worked in Emergency Medicine in total in your career?  
2

- 3  1 year or less  
4  1 year or more  
5

---

6 How many months have you worked in Emergency Medicine in total?  
7

8 \_\_\_\_\_  
9  
10

---

11 How many years have you worked in Emergency Medicine in total?  
12

13 \_\_\_\_\_  
14  
15

---

16 What is your most frequent method of transport for your commute to work?  
17

- 18  Car  
19  Motorbike  
20  Bus  
21  Train  
22  Underground  
23  Walk  
24  Run  
25  Cycle  
26  I live on-site  
27  Other  
28

---

29 You have selected other, how do you commute?  
30

31 \_\_\_\_\_  
32  
33  
34  
35  
36  
37  
38  
39  
40  
41  
42  
43  
44  
45  
46  
47  
48  
49  
50  
51  
52  
53  
54  
55  
56  
57  
58  
59  
60

**How long does your commute take in minutes (one way)?**

|                   | 1-10<br>mins          | 11-20<br>mins         | 21-30<br>mins         | 31-40<br>mins         | 41-50<br>mins         | 51-60<br>mins         | 61-70<br>mins         | 71-80<br>mins         | 81-90<br>mins         | >90<br>mins           |
|-------------------|-----------------------|-----------------------|-----------------------|-----------------------|-----------------------|-----------------------|-----------------------|-----------------------|-----------------------|-----------------------|
| On an average day | <input type="radio"/> |
| On a good day     | <input type="radio"/> |
| On a bad day      | <input type="radio"/> |

What type of contract do you work?

- Full time  
 90%, less than full time  
 80%, less than full time  
 70%, less than full time  
 60%, less than full time  
 50%, less than full time  
 less than 50%, less than full time

Do you have dedicated contracted time away from Adult Emergency Medicine (e.g. subspecialty or GP) or work in Paediatric Emergency Medicine?

- Yes  
 No

Please select all that are applicable to your current contracted time.

- ICM  
 PEM  
 PHEM  
 Academic  
 Teaching  
 Leadership/Management  
 Paediatrics  
 GP  
 Other

What is your "other" contracted time?

\_\_\_\_\_

What percentage of your contract is spent in ICM rather than EM?

- 10%  
 20%  
 25%  
 30%  
 40%  
 50%  
 60%  
 70%  
 75%  
 80%  
 90%  
 100%

---

1 What percentage of your contract is spent in PEM rather than Adult EM?  
2

- 3  10%
- 4  20%
- 5  25%
- 6  30%
- 7  40%
- 8  50%
- 9  60%
- 10  70%
- 11  75%
- 12  80%
- 13  90%
- 14  100%

---

16 What percentage of your contract is spent in PHEM rather than Adult EM?  
17

- 18  10%
- 19  20%
- 20  25%
- 21  30%
- 22  40%
- 23  50%
- 24  60%
- 25  70%
- 26  75%
- 27  80%
- 28  90%
- 29  100%

---

31 What percentage of your contract is spent Academic rather than Adult EM?  
32

- 33  10%
- 34  20%
- 35  25%
- 36  30%
- 37  40%
- 38  50%
- 39  60%
- 40  70%
- 41  75%
- 42  80%
- 43  90%
- 44  100%

---

45 What percentage of your contract is spent Teaching rather than Adult EM?  
46

- 47  10%
- 48  20%
- 49  25%
- 50  30%
- 51  40%
- 52  50%
- 53  60%
- 54  70%
- 55  75%
- 56  80%
- 57  90%
- 58  100%
- 59
- 60

---

1 What percentage of your contract is spent management/leadership rather than Adult EM?  
2

- 3  10%  
4  20%  
5  25%  
6  30%  
7  40%  
8  50%  
9  60%  
10  70%  
11  75%  
12  80%  
13  90%  
14  100%

---

16 What percentage of your contract is spent doing paediatrics rather than EM?  
17

- 18  10%  
19  20%  
20  25%  
21  30%  
22  40%  
23  50%  
24  60%  
25  70%  
26  75%  
27  80%  
28  90%  
29  100%

---

31 What percentage of your contract is spent doing GP rather than Adult EM?  
32

- 33  10%  
34  20%  
35  25%  
36  30%  
37  40%  
38  50%  
39  60%  
40  70%  
41  75%  
42  80%  
43  90%  
44  100%

---

45 What percentage of your contract is spent doing "other" activities rather than Adult EM?  
46

- 47  10%  
48  20%  
49  25%  
50  30%  
51  40%  
52  50%  
53  60%  
54  70%  
55  75%  
56  80%  
57  90%  
58  100%  
59  
60

---

1 What is the maximum number of TOTAL clinical shifts you work in a week?  
2

- 3  1 shift
- 4  2 shifts
- 5  3 shifts
- 6  4 shifts
- 7  5 shifts
- 8  6 shifts
- 9  7 shifts

---

11 What is the maximum number of CONSECUTIVE clinical shifts you would be scheduled to work?  
12

- 13  1 shift
- 14  2 shifts
- 15  3 shifts
- 16  4 shifts
- 17  5 shifts
- 18  6 shifts
- 19  7 shifts
- 20  > 7 shifts

---

22 What is the maximum number of consecutive NIGHT shifts you would be scheduled to work in a row?  
23

- 24  0 shifts
- 25  1 shift
- 26  2 shifts
- 27  3 shifts
- 28  4 shifts
- 29  5 shifts
- 30  6 shifts
- 31  7 shifts

---

33 What is the maximum number of consecutive DAY shifts you would be scheduled to work in a row?  
34

- 35  0 shifts
- 36  1 shift
- 37  2 shifts
- 38  3 shifts
- 39  4 shifts
- 40  5 shifts
- 41  6 shifts
- 42  7 shifts

---

44 What is the maximum number of consecutive TWILIGHT shifts you would be scheduled to work in a row?  
45

- 46  0 shifts
- 47  1 shift
- 48  2 shifts
- 49  3 shifts
- 50  4 shifts
- 51  5 shifts
- 52  6 shifts
- 53  7 shifts

For peer review only

1 What is your scheduled weekend work frequency?  
2

- 3  1 in 2  
4  1 in 3  
5  1 in 4  
6  1 in 5  
7  1 in 6  
8  Less frequent than 1 in 6  
9  I don't work weekends

10  
11 Over the past month how many contracted non-clinical shifts have you had? E.g. SPA, teaching, clinical governance.  
12

- 13  0 shifts  
14  Between 0-1 shifts  
15  1 shift  
16  2 shifts  
17  3 shifts  
18  4 shifts  
19  5 shifts  
20  6 shifts  
21  7 shifts  
22  8 shifts  
23  9 shifts  
24  10 shifts  
25  11-15 shifts  
26  >15 shifts

27  
28 In the past month how many locum shifts have you  
29 worked? \_\_\_\_\_

30  
31 Over the past month, roughly how often have you left more than 15 minutes late following a clinical shift?  
32

- 33  Rarely  
34  A few times a month  
35  Once a week  
36  A few times a week  
37  Everyday

38  
39 Over the past month, how often have you taken your full entitlement of breaks during a clinical shift?  
40

- 41  Rarely  
42  A few times a month  
43  Once a week  
44  A few times a week  
45  Everyday

46  
47 What proportion would you say you spend working 'out of hours' (evenings, nights or weekends)?  
48

- 49  < 25%  
50  26-50%  
51  51-75%  
52  76-100%

53  
54 What proportion of your locum shifts would you say you spend working 'out of hours' (evenings, nights or weekends)?  
55

- 56  < 25%  
57  26-50%  
58  51-75%  
59  76-100%



---

1 I have been able to request and take the annual leave I wanted?  
2

- 3  Strongly disagree
- 4  Disagree
- 5  Neutral
- 6  Agree
- 7  Strongly agree

---

9 I have been able to request and take the study leave I wanted?  
10

- 11  Strongly disagree
- 12  Disagree
- 13  Neutral
- 14  Agree
- 15  Strongly agree

---

17 Over the past month, roughly how often have you found yourself feeling overwhelmed with work during a clinical  
18 shift?  
19

- 20  Rarely
- 21  A few times a month
- 22  Once a week
- 23  A few times a week
- 24  Everyday

---

26 Do you consider yourself to have any long-term health conditions or disability?  
27

- 28  Yes
- 29  No
- 30  Prefer not to say

---

32 Do you have significant caring responsibilities outside of work?  
33 (e.g. parent or main carer for a relative)  
34

- 35  Yes
- 36  No
- 37  Prefer not to say

---

39 I feel at high risk of burnout from my job in the near future?  
40

- 41  Yes
- 42  No
- 43  Prefer not to say

---

46 I feel I am currently suffering burnout from work?  
47

- 48  Yes
  - 49  No
  - 50  Prefer not to say
- 51  
52  
53  
54  
55  
56  
57  
58  
59  
60

# TIRED Site Survey

## Department Demographics

Name of emergency department and NHS trust?

---

Number of attendances per year?

---

Any specialist designation?

- Trauma unit  
 Adult major trauma centre  
 Stroke centre  
 PCI centre  
 Paediatric major trauma centre

Number of EM Consultants?

---

Number of EM Middle Grades (ST4 and above)?

---

Number of EM Middle grade career clinicians equivalent to > ST4 (eg associate specialist, specialty doctors, CESR or other non-training doctors)?

---

Number of EM trainees ST3?

---

Number of ACCS trainees ST1-2?

---

Number of GP trainees ST1-3?

---

Number of ED GPs?

---

Number of Clinical Fellows (Fy1-ST3)?

---

Number of Clinical Fellows (>=ST4)?

---

Number of FY2s?

---

Number of FY1s?

---

Total number of ED Doctors calculated from the answers above:

---

1 Out of the total number of doctors above, how many  
2 will be ineligible for the study due to absence  
3 during the study period? (eg maternity, sick or  
4 annual leave) \_\_\_\_\_  
5

6 What percentage of eligible EM doctors do you  
7 estimate you will enrol in the survey? (ie if you  
8 have 50 doctors and think you will enrol 25 at your  
9 site, that would be 50%).

\_\_\_\_\_ (We are aiming for a response rate of 80% of  
eligible doctors as a minimum at each site but  
understand this not might be achievable.  
Therefore, this is an opportunity to document how  
many you think will be achievable at your site.)

14 Number of advanced nurse practitioners? \_\_\_\_\_  
15  
16

18 Number of advanced clinical practitioners? \_\_\_\_\_  
19  
20

21 Number of adult qualified EM nurses? \_\_\_\_\_  
22  
23

24 Number of paediatric qualified EM nurses? \_\_\_\_\_  
25  
26

28 Number of health care assistants (or equivalent)? \_\_\_\_\_  
29  
30

31 Number of EM physician associates? \_\_\_\_\_  
32  
33

34 Does your Consultant rota use self-rostering?

- Yes
- No

38 Does your Registrar rota use self-rostering?

- Yes
- No

41 Does your SHO rota use self-rostering?

- Yes
- No

**What are the current vacancy rates for permanent staff in the following roles?**

|                                          | 0-10%                 | 11-20%                | 21-30%                | 31-40%                | 41-50%                | 51-60%                | 61-70%                | 71-80%                | 81-90%                | 91-100%               |
|------------------------------------------|-----------------------|-----------------------|-----------------------|-----------------------|-----------------------|-----------------------|-----------------------|-----------------------|-----------------------|-----------------------|
| EM consultants                           | <input type="radio"/> |
| EM medical staff (excluding Consultants) | <input type="radio"/> |
| EM nursing staff                         | <input type="radio"/> |
| Non-medical staff                        | <input type="radio"/> |
| All staff                                | <input type="radio"/> |

What percentage of patients were seen within 4 hours in April 2019?

\_\_\_\_\_

What percentage of patients were seen within 4 hours in March 2019?

\_\_\_\_\_

What percentage of patients were seen within 4 hours in February 2019?

\_\_\_\_\_

What percentage of patients were seen within 4 hours in January 2019?

\_\_\_\_\_

What percentage of patients were seen within 4 hours in December 2018?

\_\_\_\_\_

What percentage of patients were seen within 4 hours in November 2018?

\_\_\_\_\_

1  
2  
3  
4  
5  
6  
7  
8  
9  
10  
11  
12  
13  
14  
15  
16  
17  
18  
19  
20  
21  
22  
23  
24  
25  
26  
27  
28  
29  
30  
31  
32  
33  
34  
35  
36  
37  
38  
39  
40  
41  
42  
43  
44  
45  
46  
47  
48  
49  
50  
51  
52  
53  
54  
55  
56  
57  
58  
59  
60

**What are the current sickness rates for the following staff groups?**

|                                          | 0-1%                  | 1-2%                  | 2-3%                  | 3-4%                  | 4-5%                  | 5-6%                  | 6-7%                  | 7-8%                  | 8-9%                  | 9-10%                 | >10%                  |
|------------------------------------------|-----------------------|-----------------------|-----------------------|-----------------------|-----------------------|-----------------------|-----------------------|-----------------------|-----------------------|-----------------------|-----------------------|
| EM Consultants                           | <input type="radio"/> |
| EM Medical Staff (excluding Consultants) | <input type="radio"/> |
| EM Nursing staff                         | <input type="radio"/> |
| Non-Medical Staff                        | <input type="radio"/> |
| All Staff                                | <input type="radio"/> |

For peer review only

**What is the Minimum Shift Length for the below groups of staff?**

|                                | 6 hours               | 7 hours               | 8 hours               | 9 hours               | 10 hours              | 11 hours              | 12 hours              | 13 hours              | N/A                   |
|--------------------------------|-----------------------|-----------------------|-----------------------|-----------------------|-----------------------|-----------------------|-----------------------|-----------------------|-----------------------|
| EM Consultants                 | <input type="radio"/> |
| EM Trainees, ST4 and above     | <input type="radio"/> |
| EM Non-training, ST4 and above | <input type="radio"/> |
| EM Trainees ST3                | <input type="radio"/> |
| ACCS Trainees ST1-2            | <input type="radio"/> |
| GP Trainees ST1-3              | <input type="radio"/> |
| Clinical Fellows (FY1- ST3)    | <input type="radio"/> |
| Clinical Fellows (>= ST4)      | <input type="radio"/> |
| Fy2 Doctors                    | <input type="radio"/> |
| Fy1 Doctors                    | <input type="radio"/> |

For peer review only

**What is the maximum shift length for the following groups of staff**

|                                | 6 hours               | 7 hours               | 8 hours               | 9 hours               | 10 hours              | 11 hours              | 12 hours              | 13 hours              | >13 hours             | N/A                   |
|--------------------------------|-----------------------|-----------------------|-----------------------|-----------------------|-----------------------|-----------------------|-----------------------|-----------------------|-----------------------|-----------------------|
| EM Consultants                 | <input type="radio"/> |
| EM Trainees, ST4 and above     | <input type="radio"/> |
| EM Non-trainees, ST4 and above | <input type="radio"/> |
| EM Trainees, ST3               | <input type="radio"/> |
| ACCS Trainees ST1-2            | <input type="radio"/> |
| GP Trainees, ST1-3             | <input type="radio"/> |
| Clinical Fellows (FY1 - ST3)   | <input type="radio"/> |
| Clinical Fellows (=>ST4)       | <input type="radio"/> |
| Fy2 Doctors                    | <input type="radio"/> |
| Fy1 Doctors                    | <input type="radio"/> |

For peer review only

**How many hours are each of the shifts on your SHO rota?****(Select multiple if this changes depending on the shift)**

|                          | < 8 hours                | 8 hours                  | 9 hours                  | 10 hours                 | 11 hours                 | 12 hours                 | >12 hour                 |
|--------------------------|--------------------------|--------------------------|--------------------------|--------------------------|--------------------------|--------------------------|--------------------------|
| Day shift (week)         | <input type="checkbox"/> |
| Night shift (week)       | <input type="checkbox"/> |
| Twilight shift (week)    | <input type="checkbox"/> |
| Day shift (weekend)      | <input type="checkbox"/> |
| Night shift (weekend)    | <input type="checkbox"/> |
| Twilight shift (weekend) | <input type="checkbox"/> |

For peer review only



**How many hours are each of the shifts on your registrar rota?**  
**(Select multiple if this changes depending on the shift)**

|                          | < 8 hours                | 8 hours                  | 9 hours                  | 10 hours                 | 11 hours                 | 12 hours                 | >12 hour                 |
|--------------------------|--------------------------|--------------------------|--------------------------|--------------------------|--------------------------|--------------------------|--------------------------|
| Day shift (week)         | <input type="checkbox"/> |
| Night shift (week)       | <input type="checkbox"/> |
| Twilight shift (week)    | <input type="checkbox"/> |
| Day shift (weekend)      | <input type="checkbox"/> |
| Night shift (weekend)    | <input type="checkbox"/> |
| Twilight shift (weekend) | <input type="checkbox"/> |

For peer review only

**How many hours are each of the shifts on your Consultant rota?**

|                          | < 8 hours             | 8 hours               | 9 hours               | 10 hours              | 11 hours              | 12 hours              | >12 hour              |
|--------------------------|-----------------------|-----------------------|-----------------------|-----------------------|-----------------------|-----------------------|-----------------------|
| Day shift (week)         | <input type="radio"/> |
| Night shift (week)       | <input type="radio"/> |
| Twilight shift (week)    | <input type="radio"/> |
| Day shift (weekend)      | <input type="radio"/> |
| Night shift (weekend)    | <input type="radio"/> |
| Twilight shift (weekend) | <input type="radio"/> |

Is there readily available rest facilities available for post night shifts?  Yes  
 No

Do people know how to access them?  Yes  
 No

Is there a break room available?  Yes  
 No

**Online Supplementary Material 3**  
**Table of Additional Participant Characteristics**

| Characteristic                                                                      | N (%)       | NFR Score                    |               |
|-------------------------------------------------------------------------------------|-------------|------------------------------|---------------|
|                                                                                     |             | Median (95% CI) <sup>1</sup> | [LQ - UQ]     |
| <b>Maximum number of consecutive day shifts you would be scheduled to work</b>      |             |                              |               |
| 0                                                                                   | 30 (0.7)    | 63.6 (50.1 to 77.2)          | [36.4 - 90.9] |
| 1                                                                                   | 42 (1.0)    | 59.1 (40.9 to 77.3)          | [27.3 - 90.9] |
| 2                                                                                   | 217 (5.3)   | 63.6 (55.1 to 72.2)          | [36.4 - 81.8] |
| 3                                                                                   | 522 (12.7)  | 63.6 (60.9 to 66.4)          | [36.4 - 81.8] |
| 4                                                                                   | 788 (19.2)  | 63.6 (63.6 to 63.6)          | [45.5 - 81.8] |
| 5                                                                                   | 1108 (27)   | 72.7 (70.0 to 75.5)          | [45.5 - 81.8] |
| 6                                                                                   | 309 (7.5)   | 72.7 (66.9 to 78.6)          | [54.5 - 90.9] |
| 7                                                                                   | 1094 (26.6) | 72.7 (72.7 to 72.7)          | [45.5 - 90.9] |
| Missing                                                                             | 137 (3.3)   | 72.7 (65.7 to 79.7)          | [50.0 - 90.9] |
| <b>Maximum number of consecutive Twilight shifts you would be scheduled to work</b> |             |                              |               |
| 0                                                                                   | 339 (8.2)   | 54.5 (48.3 to 60.8)          | [36.4 - 81.8] |
| 1                                                                                   | 341 (8.3)   | 60.0 (51.2 to 68.8)          | [36.4 - 81.8] |
| 2                                                                                   | 496 (12.1)  | 54.5 (49.9 to 59.2)          | [36.4 - 81.8] |
| 3                                                                                   | 796 (19.4)  | 63.6 (55.8 to 71.5)          | [45.5 - 81.8] |
| 4                                                                                   | 1100 (26.7) | 72.7 (69.9 to 75.5)          | [45.5 - 90.9] |
| 5                                                                                   | 600 (14.6)  | 72.7 (72.1 to 73.4)          | [54.5 - 90.9] |
| 6                                                                                   | 107 (2.6)   | 72.7 (67.6 to 77.8)          | [54.5 - 90.9] |
| 7                                                                                   | 334 (8.1)   | 81.8 (74.4 to 89.3)          | [54.5 - 90.9] |
| Missing                                                                             | 134 (3.3)   | 72.7 (67.3 to 78.1)          | [54.5 - 90.9] |
| <b>Maximum number of consecutive night shifts you would be scheduled to work</b>    |             |                              |               |
| 0                                                                                   | 1057 (25.6) | 54.5 (52.0 to 57.1)          | [27.3 - 80.0] |
| 1                                                                                   | 123 (3.0)   | 63.6 (53.2 to 74.0)          | [36.4 - 90.9] |
| 2                                                                                   | 153 (3.7)   | 54.5 (44.7 to 64.4)          | [45.5 - 81.8] |
| 3                                                                                   | 467 (11.3)  | 72.7 (65.6 to 79.9)          | [45.5 - 90.9] |
| 4                                                                                   | 2188 (53.1) | 72.7 (72.7 to 72.7)          | [54.5 - 90.9] |
| 5                                                                                   | 64 (1.6)    | 72.7 (64.4 to 81.1)          | [54.5 - 90.9] |
| 6                                                                                   | 6 (0.1)     | 54.5 (NA)                    | [45.5 - 81.8] |
| 7                                                                                   | 63 (1.5)    | 72.7 (64.4 to 81.1)          | [54.5 - 90.9] |
| Missing                                                                             | 126 (3.1)   | 72.7 (67.4 to 78.0)          | [54.5 - 90.9] |
| <b>Maximum number of clinical shifts you work in a typical week?</b>                |             |                              |               |
| 1                                                                                   | 27 (0.7)    | 63.6 (45.2 to 82.0)          | [45.5 - 90.9] |
| 2                                                                                   | 63 (1.5)    | 63.6 (49.2 to 78.1)          | [36.4 - 81.8] |

|                                                                         |             |                     |               |
|-------------------------------------------------------------------------|-------------|---------------------|---------------|
| 3                                                                       | 240 (5.9)   | 63.6 (58.1 to 69.2) | [36.4 - 81.8] |
| 4                                                                       | 553 (13.5)  | 63.6 (54.9 to 72.3) | [36.4 - 81.8] |
| 5                                                                       | 1074 (26.2) | 63.6 (62.1 to 65.2) | [45.5 - 81.8] |
| 6                                                                       | 858 (20.9)  | 72.7 (72.0 to 73.4) | [45.5 - 90.9] |
| 7                                                                       | 1285 (31.3) | 72.7 (72.7 to 72.7) | [45.5 - 90.9] |
| Missing                                                                 | 147 (3.6)   | 72.7 (67.1 to 78.3) | [45.5 - 90.9] |
| <b>Non-clinical shifts past month</b>                                   |             |                     |               |
| 0                                                                       | 1164 (28.3) | 72.7 (72.7 to 72.7) | [54.5 - 90.9] |
| <1                                                                      | 394 (9.6)   | 72.7 (72.1 to 73.4) | [54.5 - 90.9] |
| 1                                                                       | 525 (12.8)  | 72.7 (72.7 to 72.7) | [50.0 - 90.9] |
| 2                                                                       | 527 (12.8)  | 63.6 (57.3 to 70.0) | [45.5 - 81.8] |
| 3                                                                       | 242 (5.9)   | 63.6 (55.1 to 72.2) | [40.0 - 81.8] |
| 4                                                                       | 525 (12.8)  | 60.0 (51.5 to 68.5) | [36.4 - 81.8] |
| 5                                                                       | 115 (2.8)   | 54.5 (47.3 to 61.8) | [36.4 - 72.7] |
| 6                                                                       | 124 (3.0)   | 54.5 (45.6 to 63.5) | [31.7 - 80.9] |
| 7                                                                       | 39 (0.9)    | 63.6 (43.5 to 83.8) | [36.4 - 81.8] |
| 8                                                                       | 157 (3.8)   | 54.5 (45.2 to 63.9) | [36.4 - 81.8] |
| 9                                                                       | 19 (0.5)    | 60.0 (34.6 to 85.4) | [27.3 - 72.7] |
| 10                                                                      | 102 (2.5)   | 54.5 (45.2 to 63.9) | [36.4 - 80.0] |
| 11-15                                                                   | 86 (2.1)    | 54.5 (44.7 to 64.4) | [27.3 - 72.7] |
| >15                                                                     | 91 (2.2)    | 63.6 (47.6 to 79.7) | [27.3 - 81.8] |
| Missing                                                                 | 137 (3.3)   | 72.7 (66.6 to 78.9) | [54.5 - 90.9] |
| <b>Average commute in minutes</b>                                       |             |                     |               |
| 1-10                                                                    | 396 (9.6)   | 72.7 (64.2 to 81.3) | [45.5 - 81.8] |
| 11-20                                                                   | 814 (19.8)  | 72.7 (64.6 to 80.9) | [45.5 - 90.0] |
| 21-30                                                                   | 967 (23.5)  | 72.7 (64.6 to 80.8) | [45.5 - 90.9] |
| 31-40                                                                   | 703 (17.1)  | 63.6 (63.6 to 63.6) | [36.4 - 81.8] |
| 41-50                                                                   | 546 (13.3)  | 72.7 (64.5 to 81.0) | [45.5 - 90.9] |
| 51-60                                                                   | 365 (8.9)   | 72.7 (67.6 to 77.8) | [45.5 - 90.0] |
| >60                                                                     | 325 (7.9)   | 72.7 (66.9 to 78.5) | [45.5 - 90.9] |
| Missing                                                                 | 131 (3.2)   | 72.7 (68.4 to 77.1) | [54.5 - 90.9] |
| <b>Do you have a dedicated time away from adult emergency medicine?</b> |             |                     |               |
| No                                                                      | 3091 (75.2) | 72.7 (67.2 to 78.3) | [45.5 - 90.9] |
| Yes                                                                     | 1020 (24.8) | 63.6 (62.2 to 65.1) | [36.4 - 81.8] |
| Missing                                                                 | 136 (3.3)   | 72.7 (67.7 to 77.8) | [45.5 - 90.9] |

Frequency and percentage, median NFR score with 95% bootstrapped confidence intervals and the inter-quartile range of participants within each category.

<sup>1</sup> Bootstrapped 95% confidence intervals based on 1000 replications on a minimum of 8 observations.

**Online Supplementary Material 4**

**Summary of median quantile regression model fitted to the Need for Recovery (NFR) score with fixed effects for site, including the adjusted coefficient estimate (Adj. Coef. Est.) with corresponding 95% confidence interval (CI) and p-value.**

|                                                                                       | <b>Adj. Coeff. Est. (95% CI)</b> | <b>P-value<sup>1</sup></b> |
|---------------------------------------------------------------------------------------|----------------------------------|----------------------------|
| Constant<br>(baseline NFR score)                                                      | 59.51 (55.53 to 63.49)           | < 0.001                    |
| <b>Gender (baseline = Male)</b>                                                       |                                  |                            |
| • Female                                                                              | 3.38 (1.80 to 4.95)              | < 0.001                    |
| • Other/Prefer not to say                                                             | -0.10 (-7.84 to 7.64)            | 0.979                      |
| <b>Any long-term health conditions or disabilities (baseline = No)</b>                |                                  |                            |
| • Yes                                                                                 | 8.33 (5.73 to 10.93)             | < 0.001                    |
| • Prefer not to say                                                                   | 6.10 (1.78 to 10.43)             | 0.006                      |
| <b>ED paediatrics only? (baseline = No)</b>                                           |                                  |                            |
| • Yes                                                                                 | -8.47 (-12.97 to -3.98)          | < 0.001                    |
| <b>Clinical grade (baseline = Foundation)</b>                                         |                                  |                            |
| • ST1-ST2                                                                             | -0.20 (-2.55 to 2.16)            | 0.869                      |
| • > ST2                                                                               | 1.04 (-1.49 to 3.57)             | 0.421                      |
| • SASG                                                                                | -1.20 (-4.32 to 1.92)            | 0.450                      |
| • GP                                                                                  | -7.33 (-15.49 to 0.83)           | 0.078                      |
| • Consultant                                                                          | -4.94 (-7.72 to -2.17)           | < 0.001                    |
| <b>I have been able to request and take study when I wanted (baseline = Neutral)</b>  |                                  |                            |
| • Strongly disagree                                                                   | 3.45 (-0.19 to 7.10)             | 0.063                      |
| • Disagree                                                                            | 3.57 (0.53 to 6.61)              | 0.022                      |
| • Agree                                                                               | -1.18 (-3.36 to 1.00)            | 0.290                      |
| • Strongly agree                                                                      | -6.32 (-9.23 to -3.41)           | < 0.001                    |
| <b>I have been able to request and take annual when I wanted (baseline = Neutral)</b> |                                  |                            |
| • Strongly disagree                                                                   | 6.42 (2.69 to 10.15)             | 0.001                      |
| • Disagree                                                                            | 1.37 (-1.73 to 4.47)             | 0.385                      |
| • Agree                                                                               | -2.60 (-5.07 to -0.13)           | 0.039                      |
| • Strongly agree                                                                      | -4.31 (-7.33 to -1.28)           | 0.005                      |
| <b>Proportion of time spent working out of hours (baseline = 0-25%)</b>               |                                  |                            |
| • 26-50%                                                                              | 5.96 (3.16 to 8.76)              | < 0.001                    |
| • 51-75%                                                                              | 10.39 (7.54 to 13.25)            | < 0.001                    |
| • 76-100%                                                                             | 14.34 (10.92 to 17.75)           | < 0.001                    |

## Need for recovery amongst Emergency Physicians in the United Kingdom and Ireland: Findings from a Trainee Emergency Research Network (TERN) survey study

### Research Checklist: The Checklist for Reporting Results of Internet E-Surveys (CHERRIES)

| <b>CHERRIES CHECKLIST ADAPTED FROM:</b>                                                                                                                                                                                            |                                  |                                                                                                                                                                                                                                                                                                                                                                      |                                                                      |
|------------------------------------------------------------------------------------------------------------------------------------------------------------------------------------------------------------------------------------|----------------------------------|----------------------------------------------------------------------------------------------------------------------------------------------------------------------------------------------------------------------------------------------------------------------------------------------------------------------------------------------------------------------|----------------------------------------------------------------------|
| Eysenbach, Gunther. "Improving the quality of Web surveys: the Checklist for Reporting Results of Internet E-Surveys (CHERRIES)." <i>Journal of medical Internet research</i> vol. 6,3 e34. 29 Sep. 2004, doi:10.2196/jmir.6.3.e34 |                                  |                                                                                                                                                                                                                                                                                                                                                                      |                                                                      |
| <b>Item Category</b>                                                                                                                                                                                                               | <b>Checklist Item</b>            | <b>Explanation</b>                                                                                                                                                                                                                                                                                                                                                   | <b>Checklist Response</b>                                            |
| <b>IRB (Institutional Review Board) approval and informed consent process</b>                                                                                                                                                      | Describe survey design           | Describe target population, sample frame. Is the sample a convenience sample? (In "open" surveys this is most likely.)                                                                                                                                                                                                                                               | <b>Outlined in 'Methods'</b>                                         |
|                                                                                                                                                                                                                                    | IRB approval                     | Mention whether the study has been approved by an IRB.                                                                                                                                                                                                                                                                                                               | <b>Outlined in 'Ethics Approval'</b>                                 |
|                                                                                                                                                                                                                                    | Informed consent                 | Describe the informed consent process. Where were the participants told the length of time of the survey, which data were stored and where and for how long, who the investigator was, and the purpose of the study?                                                                                                                                                 | <b>Outlined in Survey Distribution, monitoring and recruitment</b>   |
|                                                                                                                                                                                                                                    | Data protection                  | If any personal information was collected or stored, describe what mechanisms were used to protect unauthorized access.                                                                                                                                                                                                                                              | <b>Outlined in Survey Distribution, monitoring and recruitment</b>   |
| <b>Development and pre-testing</b>                                                                                                                                                                                                 | Development and testing          | State how the survey was developed, including whether the usability and technical functionality of the electronic questionnaire had been tested before fielding the questionnaire.                                                                                                                                                                                   | <b>Outlined in 'Survey Development'</b>                              |
| <b>Recruitment process and description of the sample having access to the questionnaire</b>                                                                                                                                        | Open survey versus closed survey | An "open survey" is a survey open for each visitor of a site, while a closed survey is only open to a sample which the investigator knows (password-protected survey).                                                                                                                                                                                               | <b>Outlined in Survey Distribution, monitoring and recruitment</b>   |
|                                                                                                                                                                                                                                    | Contact mode                     | Indicate whether or not the initial contact with the potential participants was made on the Internet. (Investigators may also send out questionnaires by mail and allow for Web-based data entry.)                                                                                                                                                                   | <b>Outlined in 'Survey Distribution, monitoring and recruitment'</b> |
|                                                                                                                                                                                                                                    | Advertising the survey           | How/where was the survey announced or advertised? Some examples are offline media (newspapers), or online (mailing lists – If yes, which ones?) or banner ads (Where were these banner ads posted and what did they look like?). It is important to know the wording of the announcement as it will heavily influence who chooses to participate. Ideally the survey | <b>Outlined in 'Survey Distribution, monitoring and recruitment'</b> |

|                              |                                          |                                                                                                                                                                                                                                                                                                                                                                                                                                              |                                                                             |
|------------------------------|------------------------------------------|----------------------------------------------------------------------------------------------------------------------------------------------------------------------------------------------------------------------------------------------------------------------------------------------------------------------------------------------------------------------------------------------------------------------------------------------|-----------------------------------------------------------------------------|
|                              |                                          | announcement should be published as an appendix.                                                                                                                                                                                                                                                                                                                                                                                             |                                                                             |
| <b>Survey administration</b> | Web/E-mail                               | State the type of e-survey (eg, one posted on a Web site, or one sent out through e-mail). If it is an e-mail survey, were the responses entered manually into a database, or was there an automatic method for capturing responses?                                                                                                                                                                                                         | <b><i>Outlined in 'Survey Distribution, monitoring and recruitment'</i></b> |
|                              | Context                                  | Describe the Web site (for mailing list/newsgroup) in which the survey was posted. What is the Web site about, who is visiting it, what are visitors normally looking for? Discuss to what degree the content of the Web site could pre-select the sample or influence the results. For example, a survey about vaccination on a anti-immunization Web site will have different results from a Web survey conducted on a government Web site | <b><i>Outlined in 'Design'</i></b>                                          |
|                              | Mandatory/voluntary                      | Was it a mandatory survey to be filled in by every visitor who wanted to enter the Web site, or was it a voluntary survey?                                                                                                                                                                                                                                                                                                                   | <b><i>Outlined in 'Survey Distribution, monitoring and recruitment'</i></b> |
|                              | Incentives                               | Were any incentives offered (eg, monetary, prizes, or non-monetary incentives such as an offer to provide the survey results)?                                                                                                                                                                                                                                                                                                               | <b>No</b>                                                                   |
|                              | Time/Date                                | In what timeframe were the data collected?                                                                                                                                                                                                                                                                                                                                                                                                   | <b><i>Outlined in 'Sites and settings'</i></b>                              |
|                              | Randomization of items or questionnaires | To prevent biases items can be randomized or alternated.                                                                                                                                                                                                                                                                                                                                                                                     | <b><i>Not done</i></b>                                                      |
|                              | Adaptive questioning                     | Use adaptive questioning (certain items, or only conditionally displayed based on responses to other items) to reduce number and complexity of the questions                                                                                                                                                                                                                                                                                 | <b><i>Outlined in Survey Distribution, monitoring and recruitment</i></b>   |
|                              | Number of Items                          | What was the number of questionnaire items per page? The number of items is an important factor for the completion rate.                                                                                                                                                                                                                                                                                                                     | <b><i>Outlined in 'Design'</i></b>                                          |
|                              | Number of screens (pages)                | Over how many pages was the questionnaire distributed? The number of items is an important factor for the completion rate.                                                                                                                                                                                                                                                                                                                   | <b><i>Outlined in 'Design'</i></b>                                          |
|                              | Completeness check                       | It is technically possible to do consistency or completeness checks before the questionnaire is submitted. Was this done, and if "yes", how (usually JavaScript)? An alternative is to check for completeness after the questionnaire has been submitted (and highlight mandatory items). If this has been done, it should be reported. All items should provide a non-response option such as "not applicable" or                           | <b><i>Not done</i></b>                                                      |

|                                                             |                                                                                                           |                                                                                                                                                                                                                                                                                                                                                                                                                                                                                                                                |                                                                                            |
|-------------------------------------------------------------|-----------------------------------------------------------------------------------------------------------|--------------------------------------------------------------------------------------------------------------------------------------------------------------------------------------------------------------------------------------------------------------------------------------------------------------------------------------------------------------------------------------------------------------------------------------------------------------------------------------------------------------------------------|--------------------------------------------------------------------------------------------|
|                                                             |                                                                                                           | "rather not say", and selection of one response option should be enforced.                                                                                                                                                                                                                                                                                                                                                                                                                                                     |                                                                                            |
|                                                             | Review step                                                                                               | State whether respondents were able to review and change their answers (eg, through a Back button or a Review step which displays a summary of the responses and asks the respondents if they are correct).                                                                                                                                                                                                                                                                                                                    | <b><i>Outlined in Survey Distribution, monitoring and recruitment</i></b>                  |
| <b>Response rates</b>                                       | Unique site visitor                                                                                       | If you provide view rates or participation rates, you need to define how you determined a unique visitor. There are different techniques available, based on IP addresses or cookies or both.                                                                                                                                                                                                                                                                                                                                  | <b><i>Outlined in 'Results'</i></b>                                                        |
|                                                             | View rate (Ratio of unique survey visitors/unique site visitors)                                          | Requires counting unique visitors to the first page of the survey, divided by the number of unique site visitors (not page views!). It is not unusual to have view rates of less than 0.1 % if the survey is voluntary                                                                                                                                                                                                                                                                                                         | <b><i>Survey site contains first page of survey therefore N/A</i></b>                      |
|                                                             | Participation rate (Ratio of unique visitors who agreed to participate/unique first survey page visitors) | Count the unique number of people who filled in the first survey page (or agreed to participate, for example by checking a checkbox), divided by visitors who visit the first page of the survey (or the informed consents page, if present). This can also be called "recruitment" rate.                                                                                                                                                                                                                                      | <b><i>Outlined in 'Results'</i></b>                                                        |
|                                                             | Completion rate (Ratio of users who finished the survey/users who agreed to participate)                  | The number of people submitting the last questionnaire page, divided by the number of people who agreed to participate (or submitted the first survey page). This is only relevant if there is a separate "informed consent" page or if the survey goes over several pages. This is a measure for attrition. Note that "completion" can involve leaving questionnaire items blank. This is not a measure for how completely questionnaires were filled in. (If you need a measure for this, use the word "completeness rate".) | <b><i>Outlined in 'Results'</i></b>                                                        |
| <b>Preventing multiple entries from the same individual</b> | Cookies used                                                                                              | Indicate whether cookies were used to assign a unique user identifier to each client computer. If so, mention the page on which the cookie was set and read, and how long the cookie was valid. Were duplicate entries avoided by preventing users access to the survey twice; or were duplicate database entries having the same user ID eliminated before analysis? In the latter case, which entries were kept for analysis (eg, the first entry or the most recent)?                                                       | <b><i>Not used</i></b>                                                                     |
|                                                             | IP check                                                                                                  | Indicate whether the IP address of the client computer was used to identify potential duplicate entries from the same user. If so, mention the period of                                                                                                                                                                                                                                                                                                                                                                       | <b><i>Not used due to survey being completed on multi-user/single log-in computers</i></b> |



|                 |                                                     |                                                                                                                                                                                                                                                                                                                                                                                                                                   |                                    |
|-----------------|-----------------------------------------------------|-----------------------------------------------------------------------------------------------------------------------------------------------------------------------------------------------------------------------------------------------------------------------------------------------------------------------------------------------------------------------------------------------------------------------------------|------------------------------------|
|                 |                                                     | time for which no two entries from the same IP address were allowed (eg, 24 hours). Were duplicate entries avoided by preventing users with the same IP address access to the survey twice; or were duplicate database entries having the same IP address within a given period of time eliminated before analysis? If the latter, which entries were kept for analysis (eg, the first entry or the most recent)?                 |                                    |
|                 | Log file analysis                                   | Indicate whether other techniques to analyze the log file for identification of multiple entries were used. If so, please describe.                                                                                                                                                                                                                                                                                               | <b>Not done</b>                    |
|                 | Registration                                        | In "closed" (non-open) surveys, users need to login first and it is easier to prevent duplicate entries from the same user. Describe how this was done. For example, was the survey never displayed a second time once the user had filled it in, or was the username stored together with the survey results and later eliminated? If the latter, which entries were kept for analysis (eg, the first entry or the most recent)? | <b>N/A</b>                         |
| <b>Analysis</b> | Handling of incomplete questionnaires               | Were only completed questionnaires analyzed? Were questionnaires which terminated early (where, for example, users did not go through all questionnaire pages) also analyzed?                                                                                                                                                                                                                                                     | <b>Outlined in 'Data Analysis'</b> |
|                 | Questionnaires submitted with an atypical timestamp | Some investigators may measure the time people needed to fill in a questionnaire and exclude questionnaires that were submitted too soon. Specify the timeframe that was used as a cut-off point, and describe how this point was determined                                                                                                                                                                                      | <b>N/A</b>                         |
|                 | Statistical correction                              | Indicate whether any methods such as weighting of items or propensity scores have been used to adjust for the non-representative sample; if so, please describe the methods.                                                                                                                                                                                                                                                      | <b>Outlined in 'Data Analysis'</b> |

# BMJ Open

## Need for recovery amongst Emergency Physicians in the United Kingdom and Ireland: a cross-sectional survey

|                                 |                                                                                                                                                                                                                                                                                                                                                                                                                                                                                                                                                                                                                                                                                                                                                                                                                       |
|---------------------------------|-----------------------------------------------------------------------------------------------------------------------------------------------------------------------------------------------------------------------------------------------------------------------------------------------------------------------------------------------------------------------------------------------------------------------------------------------------------------------------------------------------------------------------------------------------------------------------------------------------------------------------------------------------------------------------------------------------------------------------------------------------------------------------------------------------------------------|
| Journal:                        | <i>BMJ Open</i>                                                                                                                                                                                                                                                                                                                                                                                                                                                                                                                                                                                                                                                                                                                                                                                                       |
| Manuscript ID                   | bmjopen-2020-041485.R1                                                                                                                                                                                                                                                                                                                                                                                                                                                                                                                                                                                                                                                                                                                                                                                                |
| Article Type:                   | Original research                                                                                                                                                                                                                                                                                                                                                                                                                                                                                                                                                                                                                                                                                                                                                                                                     |
| Date Submitted by the Author:   | 03-Aug-2020                                                                                                                                                                                                                                                                                                                                                                                                                                                                                                                                                                                                                                                                                                                                                                                                           |
| Complete List of Authors:       | Cottey, Laura; University Hospitals Plymouth NHS Trust, Emergency Department; Royal Centre for Defence Medicine, Academic Department of Military Emergency Medicine<br>Roberts, Tom; The Royal College of Emergency Medicine, Graham, Blair; University of Plymouth; Plymouth Hospitals NHS Foundation Trust, Emergency Department<br>Horner , Daniel; The Royal College of Emergency Medicine; Salford Royal Hospitals NHS Trust, Department of Intensive Care<br>Stevens, Kara; University of Plymouth, Medical Statistics<br>Enki, Doyo; University of Nottingham, Medical Statistics<br>Lyttle, Mark; Bristol Royal Hospital for Children, Emergency Department; University of the West of England, Faculty of Health and Applied Science<br>Latour, Jos; University of Plymouth School of Nursing and Midwifery, |
| <b>Primary Subject Heading</b>: | Emergency medicine                                                                                                                                                                                                                                                                                                                                                                                                                                                                                                                                                                                                                                                                                                                                                                                                    |
| Secondary Subject Heading:      | Medical management, Occupational and environmental medicine, Health services research                                                                                                                                                                                                                                                                                                                                                                                                                                                                                                                                                                                                                                                                                                                                 |
| Keywords:                       | ACCIDENT & EMERGENCY MEDICINE, HEALTH SERVICES ADMINISTRATION & MANAGEMENT, Human resource management < HEALTH SERVICES ADMINISTRATION & MANAGEMENT, Organisation of health services < HEALTH SERVICES ADMINISTRATION & MANAGEMENT, OCCUPATIONAL & INDUSTRIAL MEDICINE                                                                                                                                                                                                                                                                                                                                                                                                                                                                                                                                                |
|                                 |                                                                                                                                                                                                                                                                                                                                                                                                                                                                                                                                                                                                                                                                                                                                                                                                                       |

SCHOLARONE™  
Manuscripts



I, the Submitting Author has the right to grant and does grant on behalf of all authors of the Work (as defined in the below author licence), an exclusive licence and/or a non-exclusive licence for contributions from authors who are: i) UK Crown employees; ii) where BMJ has agreed a CC-BY licence shall apply, and/or iii) in accordance with the terms applicable for US Federal Government officers or employees acting as part of their official duties; on a worldwide, perpetual, irrevocable, royalty-free basis to BMJ Publishing Group Ltd ("BMJ") its licensees and where the relevant Journal is co-owned by BMJ to the co-owners of the Journal, to publish the Work in this journal and any other BMJ products and to exploit all rights, as set out in our [licence](#).

The Submitting Author accepts and understands that any supply made under these terms is made by BMJ to the Submitting Author unless you are acting as an employee on behalf of your employer or a postgraduate student of an affiliated institution which is paying any applicable article publishing charge ("APC") for Open Access articles. Where the Submitting Author wishes to make the Work available on an Open Access basis (and intends to pay the relevant APC), the terms of reuse of such Open Access shall be governed by a Creative Commons licence – details of these licences and which [Creative Commons](#) licence will apply to this Work are set out in our licence referred to above.

Other than as permitted in any relevant BMJ Author's Self Archiving Policies, I confirm this Work has not been accepted for publication elsewhere, is not being considered for publication elsewhere and does not duplicate material already published. I confirm all authors consent to publication of this Work and authorise the granting of this licence.

1  
2  
3  
4  
5  
6  
7  
8  
9  
10  
11  
12  
13  
14  
15  
16  
17  
18  
19  
20  
21  
22  
23  
24  
25  
26  
27  
28  
29  
30  
31  
32  
33  
34  
35  
36  
37  
38  
39  
40  
41  
42  
43  
44  
45  
46  
47  
48  
49  
50  
51  
52  
53  
54  
55  
56  
57  
58  
59  
60

1 **Need for recovery amongst Emergency Physicians in the United**  
2 **Kingdom and Ireland: a cross-sectional survey**

3  
4 Laura COTTEY, BM, BSc (Hons), MSc; Tom ROBERTS, MBChB; Blair  
5 GRAHAM, BMBS, BSc (Hons); Daniel HORNER, BA, MBBS, MD; Kara  
6 STEVENS, PhD; Doyo ENKI, PhD; Mark D LYTTLE, MBChB; Jos M.  
7 LATOUR, RN, PhD; On behalf of the Trainee Emergency Research Network  
8 (TERN) and Paediatric Emergency Research in the UK and Ireland (PERUKI).

9  
10 Dr Laura COTTEY

11 Academic Clinical Fellow Emergency Medicine, University Hospitals Plymouth  
12 NHS Trust, UK

13 Academic Department of Military Emergency Medicine, Royal Centre for  
14 Defence Medicine, Birmingham, UK

15 Dr Tom ROBERTS

16 Research Fellow Trainee Emergency Research Network (TERN), Royal  
17 College of Emergency Medicine, London, UK.

18 Dr Blair GRAHAM

19 Lecturer in Urgent & Emergency Care, Faculty of Health, Plymouth University,  
20 UK

21 Speciality Registrar in Emergency Medicine, University Hospitals Plymouth  
22 NHS Trust, UK

23 Professor Daniel HORNER

24 Professor of the Royal College of Emergency Medicine

25 Consultant in Emergency and Critical Care Medicine, Salford Royal NHS  
26 Foundation Trust, UK

27 Dr Kara STEVENS

28 Research Fellow in Medical Statistics, Faculty of Health, University of  
29 Plymouth, UK

30 Dr Doyo ENKI

31 Senior Medical Statistician, Faculty of Medicine & Health Sciences, University  
32 of Nottingham, UK

33 Dr Mark D. LYTTLE

34 Emergency Department, Bristol Royal Hospital for Children, Bristol, UK

35 Faculty of Health and Applied Sciences, University of the West of England,  
36 Bristol, UK

37 Professor Jos M. LATOUR

38 Professor of Clinical Nursing, Faculty of Health, University of Plymouth, UK

39

40 The list of Trainee Emergency Research Network and Paediatric Emergency  
41 Research in the UK and Ireland collaborators is included at the end of the  
42 statements section.

43

#### 44 **Corresponding Author**

45 Dr Laura Cottey

46 Academic Department of Military Emergency Medicine

47 Royal Centre for Defence Medicine

48 ICT Centre

49 Birmingham Research Park

50 Vincent Drive

51 Edgbaston

52 Birmingham

53 B15 2SQ

54 Email: laurajcottey@gmail.com

55 Phone 07470 277184

56

#### 57 **Manuscript data:**

58 Abstract: 299

59 Word Count (Main Body): 3378

60 References: 47

61 Electronic Supplementary Material: 5

62 Figures: 2

63 Tables: 4

64

65 **Keywords:** Emergency Medicine; Human resource management;

66 Organisation of health services; Occupational and Industrial medicine.

67

1  
2  
3 68 **ABSTRACT**  
4

5 69 **Objectives:** To determine the need for recovery (NFR) among Emergency  
6  
7  
8 70 Physicians and to identify demographic and occupational characteristics  
9  
10 71 associated with higher NFR scores.

11  
12 72 **Design:** Cross-sectional electronic survey.

13  
14 73 **Setting:** Emergency Departments (ED) (n=112) in the United Kingdom and  
15  
16  
17 74 Ireland.

18  
19 75 **Participants:** Emergency Physicians, defined as any registered physician  
20  
21 76 working principally within the ED, responding between June-July 2019.

22  
23 77 **Main outcome measure:** NFR scale, an 11-item self-administered  
24  
25 78 questionnaire that assesses how work demands affect inter-shift recovery.

26  
27 79 **Results:** The median NFR score for all 4247 eligible, consented participants  
28  
29 80 with a valid NFR score was 70.0 (95% CI: 65.5 to 74.5), with an IQR of 45.5–  
30  
31 81 90.0. A linear regression model indicated statistically significant associations  
32  
33 82 between gender, health conditions, type of ED, clinical grade, access to  
34  
35 83 annual and study leave, and time spent working out-of-hours. Groups  
36  
37 84 including male physicians, consultants, General Practitioners within the ED,  
38  
39 85 those working in paediatric EDs and those with no long-term health condition  
40  
41 86 or disability had a lower NFR score. After adjusting for these characteristics,  
42  
43 87 the NFR score increased by 3.7 (95% CI: 0.3 to 7.1) and 6.43 (95% CI: 2.0 to  
44  
45 88 10.8) for those with difficulty accessing annual and study leave, respectively.  
46  
47 89 Increased percentage of out-of-hours work increased NFR score almost  
48  
49 90 linearly: 26-50% out-of-hours work = 5.7 (95% CI: 3.1 to 8.4); 51-75% out-of-  
50  
51 91 hours work = 10.3 (95% CI: 7.6 to 13.0); 76-100% out-of-hours work = 14.5  
52  
53  
54  
55  
56  
57 92 (95% CI: 11.0 to 17.9).  
58  
59  
60

1  
2  
3 93 **Conclusion:** Higher NFR scores were observed among Emergency  
4  
5 94 Physicians than reported in any other profession or population to date. Whilst  
6  
7 95 out-of-hours working is unavoidable, the linear relationship observed suggests  
8  
9 96 that any reduction may result in NFR improvement. Evidence-based  
10  
11 97 strategies to improve well-being such as proportional out-of-hours working  
12  
13 98 and improved access to annual and study leave should be carefully  
14  
15 99 considered and implemented where feasible.  
16  
17  
18  
19  
20  
21  
22  
23  
24  
25  
26  
27  
28  
29  
30  
31  
32  
33  
34  
35  
36  
37  
38  
39  
40  
41  
42  
43  
44  
45  
46  
47  
48  
49  
50  
51  
52  
53  
54  
55  
56  
57  
58  
59  
60

1  
2  
3 118 **ARTICLE SUMMARY**

4  
5 119  
6 120 **Strengths and limitations of this study**

- 7 121  
8 122  
9 123 • This is the first study evaluating the need for recovery (NFR) scale within a  
10  
11 large healthcare population.  
12 124  
13  
14 125  
15  
16 126 • The inclusion of responses from over half of all UK Emergency  
17  
18 Departments indicates the results are likely to be generalisable.  
19 127  
20  
21 128  
22  
23 129 • The high volume of responses, with over half of study sites exceeding 70%  
24  
25 participant response rates, indicates that the NFR scale is an acceptable  
26 130  
27 measurement tool for physicians.  
28 131  
29  
30 132  
31  
32 133 • The study is limited by the single-point of time measurement therefore  
33  
34 seasonal bias cannot be excluded and further assessment of test-retest  
35 134  
36 reliability is desirable.  
37 135  
38  
39 136  
40  
41 137 • The use of self-administered dichotomous questionnaires is acknowledged  
42  
43 to limit wider insights into physician recovery and well-being.  
44 138  
45  
46  
47  
48  
49  
50  
51  
52  
53  
54  
55  
56  
57  
58  
59  
60



## 139 INTRODUCTION

140 Recruitment and retention challenges in acute care pose a significant and  
141 ongoing threat to effective healthcare provision. The need to maintain a healthy  
142 and sustainable workforce is vital to safeguard future services.[1] Physician  
143 well-being is a key influence on retention, with low job satisfaction and high  
144 levels of stress directly leading to concern over job sustainability.[2–4] Globally,  
145 high rates of physician burnout are increasingly recognised, along with the  
146 consequent negative impact on delivery of high quality patient care.[5–10]

147 The Need for Recovery (NFR) scale measures the subjective perception  
148 of the need to recuperate from physical and mental demands of a working day,  
149 and is a suitable tool with which to assess the early symptoms of fatigue in shift  
150 workers.[11,12] Within unscheduled care settings such as emergency  
151 medicine, shift work is often of high intensity, and additional factors such as  
152 department crowding, pressured resources and inability to control patient  
153 volume may also influence NFR. Where fatigue does occur and cannot be  
154 sufficiently recovered between shifts, the effect is cumulative and may lead to  
155 increased occupational stress and impaired long-term health.[13,14]

156  
157 Burnout inventories are increasingly utilised as an attempt to measure  
158 physician well-being.[15] Although they provide valuable insight into well-  
159 being, they are not without issue. Limitations include variability in burnout  
160 definitions, time required for completion, ease of completion, respondent  
161 survey fatigue, and difficulty translating results into intervention.[16,17,18]  
162 Additionally, these methods quantify established burnout; once this has  
163 occurred the human and financial resource impact is already immense, with

1  
2  
3 164 associated workforce depletion and negligible mitigation strategies.[19,20]  
4

5 165 The identification of those clinicians *at risk* of burnout, at an early timepoint  
6

7 166 when interventions may be effective, presents a critical challenge.  
8  
9

10 167

11  
12 168 Increasing NFR is associated with the likelihood of progression to  
13

14 169 occupational burnout and health complaints, with negative effects cumulative  
15

16 170 over time in several validation studies [11,13]. Increased NFR may therefore  
17

18 171 precede the onset of sustained occupational burnout, and offer advantages  
19

20 172 over other burnout inventories as a simple quantifiable metric obtained through  
21

22 173 a rapid, standalone, and repeatable 11-item questionnaire. A single centre  
23

24 174 study assessing the utility of the NFR in an ED population reported a high  
25

26 175 response rate (80%) and completion time of less than 10 minutes whilst gaining  
27

28 176 insight into shift patterns, work-life balance and well-being (21). This might  
29

30 177 suggest that the method of questioning used in the NFR scale and emphasis  
31

32 178 on recovery as opposed to more emotive questioning could be beneficial in  
33

34 179 improving response rates and reducing respondent fatigue in repeat usage. As  
35

36 180 such, NFR may provide a valuable option for regular evaluating of staff well-  
37

38 181 being and identifying opportunity for early intervention in busy EDs. Staff well-  
39

40 182 being is the fourth highest Emergency Medicine (EM) Research Priority  
41

42 183 identified by the James Lind Alliance Priority Setting Partnership, involving  
43

44 184 patients, carers and physicians.[22].  
45  
46

47 185  
48

49 186 We therefore aimed to determine the NFR among Emergency  
50

51 187 Physicians in EDs in the UK and Ireland, and identify demographic and  
52

53 188 occupational characteristics associated with higher NFR scores that might  
54  
55  
56  
57  
58  
59  
60

1  
2  
3 189 allow for early targeted intervention to improve physicians' well-being and  
4  
5 190 reduce burnout.  
6  
7

8 191

9  
10 192 **METHODS**

11  
12 193 This cross-sectional electronic survey study targeted a representative sample  
13  
14 194 of Emergency Physicians working across the UK and Ireland, and was  
15  
16 195 performed and reported in line with the Checklist for Reporting Results of  
17  
18 196 Internet E-surveys.[23] The study was registered at ISRCTN  
19  
20 197 (<https://doi.org/10.1186/ISRCTN21869845>). Ethical approval was obtained  
21  
22 198 from the UK Health Research Authority (Reference: 19/HRA/2404) alongside  
23  
24 199 equivalent approvals in Scotland, Northern Ireland and Ireland.  
25  
26  
27  
28  
29

30  
31 201 **Settings and Participants**

32  
33 202 An initial sample of 100 EDs was deemed necessary to ensure inclusion of  
34  
35 203 greater than 50% of Type 1 EDs, defined as 'an EM consultant-led 24-hour  
36  
37 204 service with full resuscitation facilities', in England. [24] The study was  
38  
39 205 coordinated via the UK Trainee Emergency Research Network (TERN) and  
40  
41 206 delivered in collaboration with Paediatric Emergency Research in the UK and  
42  
43 207 Ireland (PERUKI) and Ireland TERN. [25, 26] Signposting to the survey and  
44  
45 208 enrolment of participants was led by site principal investigators (PI), who were  
46  
47 209 provided with standardised study documentation. Local and national promotion  
48  
49 210 of the study was conducted at professional meetings, through social media,  
50  
51 211 national newsletters, and using the Clinical Research Network infrastructure.  
52  
53

54  
55  
56 212 Physicians of any grade who were registered with either the UK General  
57  
58 213 Medical Council or Irish Medical Council, and who were employed within a  
59  
60

1  
2  
3 214 participating ED, were invited to participate. For the purposes of this study, the  
4  
5 215 term Emergency Physician is defined as all doctors working within the ED. This  
6  
7 216 included; doctors specialising in EM, comprising six years of postgraduate  
8  
9 217 training for full qualification to achieve the grade of Emergency Medicine  
10  
11 218 consultant, or non-EM specialists undertaking rotations in the ED as part of their  
12  
13 219 professional training, including those in the first and second year of  
14  
15 220 postgraduate training and physicians undertaking training in General Practice,  
16  
17 221 Anaesthesia and Acute Medicine who commonly undertake a four to six month  
18  
19 222 ED rotation (Online Supplementary Material 1). Physicians who did not hold a  
20  
21 223 permanent contract with a participating hospital (such as those working ad-hoc  
22  
23 224 locum shifts), those on leave during the study period, and those in a non-clinical  
24  
25 225 role were excluded.

### 226 **Survey Development**

227 The NFR scale consists of 11 items each requiring a dichotomous 'yes' or 'no'  
228 response, originally developed as a subscale of the Dutch Questionnaire on the  
229 Experience and Evaluation of Work (QEEW) (Online Supplementary material  
230 2, page 10).[27] Indicators of fatigue such as reduced motivation for activities  
231 and concentration at the end of a working day are assessed to measure the  
232 effect of work demands experienced. A 'yes' response to an item, with the  
233 exception of question four which is reversed, signals an unfavourable situation.  
234 The 11 items are then summated to give an overall score between 0 and 100,  
235 with a higher score denoting a greater NFR and increased short-term work-  
236 related fatigue. The NFR has previously been demonstrated to have an overall  
237 Cronbach's alpha of 0.88, a measure of internal consistency and questionnaire  
238 reliability, with a range of 0.81 to 0.92 in subgroup analyses of the same

1  
2  
3 239 validation study.[28] Following a minor amendment to one question to increase  
4  
5 240 applicability to the study population (from 'After the evening meal, I generally  
6  
7 241 feel in good shape' to 'After my breaks I feel fresh to continue my work'),  
8  
9  
10 242 feasibility work in a single UK centre demonstrated a Cronbach's alpha of 0.79,  
11  
12 243 and found that the NFR scale was acceptable and user-friendly. [21]  
13

14 244 A patient and public involvement (PPI) consultation was conducted at  
15  
16  
17 245 the UK Emergency Medicine Trainee Association Conference (Cardiff,  
18  
19 246 December 2018), using a semi-structured question guide for mixed focus  
20  
21 247 groups to review a proposed participant survey. A key element of this  
22  
23 248 consultation explored the use of a burnout inventory within the proposed study;  
24  
25 249 concerns relating to respondent fatigue, length of survey and assessment of  
26  
27 250 questions using a Likert scale indicated that such an inventory was not  
28  
29 251 universally acceptable to Emergency Physicians. Based on this consultation,  
30  
31 252 the final participant survey included the 11-item NFR scale used in the feasibility  
32  
33 253 work and 44-items collecting the participants' demographic, occupational and  
34  
35 254 perceived well-being characteristics (Online Supplementary Material 2).  
36  
37 255 Questions relating to 'out-of-hours' work were defined as work outside of  
38  
39 256 normal working office hours (9am until 5pm, Monday to Friday).  
40  
41  
42  
43

44 257 A separate site-specific survey was developed de novo with expert input  
45  
46 258 from experienced EM physicians, consisting of 39-items identified from the  
47  
48 259 literature and/or consensus of the study team, which explored departmental,  
49  
50 260 rota pattern and staffing characteristics likely to provide context for analysis and  
51  
52 261 interpretation of individual survey results (Online Supplementary Material 3).  
53  
54 262 Only one site-specific survey was required per participating centre and was  
55  
56 263 completed by the site PI.  
57  
58  
59  
60

## 264 **Survey Distribution, monitoring and recruitment**

265 All participants were provided with an information sheet, and consented to  
266 participation prior to completing the survey; this was voluntary, anonymous, and  
267 no incentives were given. Respondents were able to review and change their  
268 answers prior to final submission of the survey. Branching logic was used for  
269 responses to certain questions. Data were collected during a six-week period  
270 from 3rd June 2019. During this period, advertisement of the survey and weekly  
271 reminders were sent out via site PIs. The participant and site-specific surveys  
272 were open surveys accessed through a link and hosted on a research specific  
273 electronic survey platform, Research Electronic Data Capture platform  
274 ('REDCap'; University of Bristol), which complies with European General Data  
275 Protection Regulations.[29,30]

276 Prior to study commencement, site PIs provided a best estimate of  
277 eligible participants which accounted for local physician absence due to  
278 sickness, leave, and factors such as sabbaticals and professional  
279 secondments. This denominator was used to give a best-estimate of the per-  
280 site survey response rate, with a stated aim of achieving a 70% response rate.

## 281 **Statistical Analysis**

282 Statistical analysis was undertaken using STATA 14. [31] Participants were  
283 only included in any of the reported analyses if they were from one of the 112  
284 registered sites and provided a response for at least eight of the 11 items of the  
285 NFR scale as per imputation guidelines. Imputation was performed by replacing  
286 missing items with the mean of all completed item responses. [32]

1  
2  
3 287 As one item in the NFR scale was amended due to applicability to the  
4  
5 288 study population, the internal consistency of the NFR scale for all participants  
6  
7  
8 289 with a valid NFR score was calculated by Cronbach's alpha.  
9

10 290 To describe the study sample, the frequency and percentage of  
11  
12 291 participants by site, demographic and occupational characteristics are reported.  
13  
14 292 As the distribution of the NFR score in this study was negatively skewed,  
15  
16  
17 293 summary statistics of the median NFR score are reported with corresponding  
18  
19 294 bootstrapped 95% confidence intervals from 1000 replications (providing there  
20  
21 295 are at least 8 observations to allow for sufficient number of sample  
22  
23 296 combinations), and inter-quartile ranges (IQR) of all eligible participants. Box  
24  
25  
26 297 plots were used as visual aids to identify covariates that may have a statistically  
27  
28 298 significant association with the NFR score and the nature of the relationship.  
29

30 299 To facilitate comparisons with previous published literature and given  
31  
32 300 the large number of participants, we fitted Gaussian, mixed effects, linear  
33  
34 301 regression models to NFR score, where site was included as a random effect  
35  
36 302 to account for potentially unknown differences between EDs. To identify  
37  
38 303 statistically significant associations between the NFR score and observed  
39  
40 304 covariates, the forward model selection procedure was implemented; inclusion  
41  
42 305 in the model was based upon the goodness of fit test at the 5% level of  
43  
44 306 significance, using only participants with complete NFR score and covariate  
45  
46 307 data. The final model was estimated using participants with complete data for  
47  
48 308 the included covariates and NFR score, with the coefficient estimate calculated  
49  
50 309 by adjusting for all covariates reported in the model. Quantile regression was  
51  
52 310 used to confirm the direction and significance of the identified associations  
53  
54 311 under non-parametric assumptions.  
55  
56  
57  
58  
59  
60

312

313 **RESULTS**

314 Characteristics of the 112 participating sites are presented in table 1.

315 **Table 1: Characteristics of sites registered to take part in the survey study**

| Site Characteristics      | N (%)<br>Total = 112 |
|---------------------------|----------------------|
| Country                   |                      |
| England                   | 89 (79.5)            |
| Wales                     | 3 (2.7)              |
| Northern Ireland          | 3 (2.7)              |
| Scotland                  | 12 (10.7)            |
| Republic of Ireland       | 5 (4.4)              |
| ED Annual Attendance      |                      |
| ≤ 50,000                  | 11 (9.8)             |
| 50,001 to 100,000         | 46 (41.1)            |
| >100,000                  | 42 (37.5)            |
| <i>Missing</i>            | 13 (11.6)            |
| Specialist Designation    |                      |
| Trauma Unit (TU)          | 55 (49.1)            |
| Major Trauma Centre (MTC) | 25 (22.3)            |
| Stroke Centre             | 42 (37.5)            |
| PCI Centre                | 30 (26.8)            |

316

317 *ED Emergency department*318 *TU In the UK National Health Service, a hospital that provides care for all except the most*  
319 *severe major trauma patients. May provide initial stabilisation of severely injured patients prior*  
320 *to transfer to an MTC.*321 *MTC A specialist (tertiary) centre responsible for care of the most severely injured patients.*322 *PCI Percutaneous Coronary Intervention*

323

324

325

326 Of 5107 unique visits to the online survey, 4365 of these were registered at one

327 of the 112 sites and provided consent, with 4247 completing at least eight items

328 of the NFR scale. Cronbach's alpha for all participants with a valid NFR score



329 was 0.80. The median NFR score across all eligible participants was 70.0 (95%  
 330 CI: 65.5 to 74.5), with an IQR of 45.5 – 90.0. Figure 1 and Figure 2, and tables  
 331 2 and 3 present a selection of participant's NFR score by demographic and  
 332 occupational characteristics, with additional characteristics presented in the  
 333 Online Supplementary Material 4.

334 **Table 2: Summary statistics of NFR score by participant's characteristics.** Frequency  
 335 and percentage, median Need for Recovery (NFR) score with 95% bootstrapped confidence  
 336 intervals and the inter-quartile range of participants within each category.

| Participant Characteristics                         | N (%)       | NFR Score              |               |
|-----------------------------------------------------|-------------|------------------------|---------------|
|                                                     |             | Median (95% CI)        | [LQ - UQ]     |
| All participants                                    | 4247 (100)  | 70.0 (62.0 to 78.0)    | [45.5 - 90.0] |
| Length of time worked in current ED (months)        |             |                        |               |
| 0 to 3                                              | 740 (17.5)  | 72.7 (71.7 to 73.8)    | [45.5 - 90.9] |
| > 3 to 6                                            | 848 (20.0)  | 72.7 (72.7 to 72.7)    | [54.5 - 90.9] |
| > 6 to 12                                           | 729 (17.2)  | 72.7 (64.7 to 80.7)    | [45.5 - 90.9] |
| > 12 to 24                                          | 370 (8.7)   | 63.6 (58.8 to 68.4)    | [45.5 - 90.9] |
| > 24 to 60                                          | 583 (13.8)  | 63.6 (62.2 to 65.1)    | [36.4 - 81.8] |
| > 60 to 120                                         | 497 (11.7)  | 63.6 (56.7 to 70.5)    | [36.4 - 81.8] |
| > 120                                               | 473 (11.2)  | 54.5 (46.6 to 62.5)    | [36.4 - 81.8] |
| Missing                                             | 7 (0.2)     | 18.2 (NA) <sup>1</sup> | [9.1 - 54.5]  |
| Type of contract                                    |             |                        |               |
| 100%                                                | 3445 (83.5) | 72.7 (67.1 to 78.4)    | [45.5 - 90.9] |
| 90%                                                 | 72 (1.7)    | 63.6 (54.0 to 73.3)    | [36.4 - 81.8] |
| 80%                                                 | 200 (4.8)   | 63.6 (61.4 to 65.8)    | [45.5 - 81.8] |
| 70%                                                 | 116 (2.8)   | 72.7 (63.6 to 81.9)    | [50.0 - 81.8] |
| 60%                                                 | 142 (3.4)   | 63.6 (54.4 to 72.9)    | [45.5 - 90.9] |
| 50%                                                 | 85 (2.1)    | 63.6 (53.5 to 73.7)    | [36.4 - 81.8] |
| < 50%                                               | 66 (1.6)    | 50.0 (35.7 to 64.3)    | [27.3 - 81.8] |
| Missing                                             | 121 (2.9)   | 72.7 (67.8 to 77.7)    | [54.5 - 90.9] |
| Significant caring responsibilities outside of work |             |                        |               |
| No                                                  | 2616 (63.6) | 72.7 (68.5 to 77.0)    | [45.5 - 90.9] |
| Yes                                                 | 1427 (34.7) | 63.6 (62.8 to 64.5)    | [36.4 - 81.8] |
| Prefer not to say                                   | 73 (1.8)    | 81.8 (71.0 to 92.7)    | [54.5 - 90.9] |
| Missing                                             | 131 (3.2)   | 72.7 (68.2 to 77.3)    | [54.5 - 90.9] |

337 <sup>1</sup> Insufficient observations for Bootstrapped 95% confidence intervals based

338  
 339 **Table 3: Summary statistics of NFR score by occupational characteristics.** Frequency  
 340 and percentage, median Need for Recovery (NFR) score with 95% bootstrapped confidence  
 341 intervals and the inter-quartile range of participants within each category.

| Occupational | N (%) | NFR Score |
|--------------|-------|-----------|
|--------------|-------|-----------|

| Characteristics                                                 |             | Median (95% CI) <sup>1</sup> | [LQ - UQ]     |
|-----------------------------------------------------------------|-------------|------------------------------|---------------|
| All participants                                                | 4247 (100)  | 70.0 (62.0 to 78.0)          | [45.5 - 90.0] |
| scheduled weekend work frequency                                |             |                              |               |
| 1 in 2                                                          | 1479 (36.0) | 72.7 (72.3 to 73.2)          | [54.5 - 90.9] |
| 1 in 3                                                          | 865 (21.1)  | 72.7 (68.1 to 77.4)          | [45.5 - 90.9] |
| 1 in 4                                                          | 542 (13.2)  | 63.6 (57.1 to 70.2)          | [45.5 - 81.8] |
| 1 in 5                                                          | 310 (7.5)   | 54.5 (48.4 to 60.7)          | [36.4 - 81.8] |
| 1 in 6                                                          | 485 (11.8)  | 54.5 (49.8 to 59.3)          | [27.3 - 81.8] |
| < 1 in 6                                                        | 307 (7.5)   | 63.6 (55.2 to 72.1)          | [36.4 - 81.8] |
| None                                                            | 121 (2.9)   | 54.5 (45.7 to 63.4)          | [27.3 - 81.8] |
| Missing                                                         | 138 (3.4)   | 72.7 (65.9 to 79.6)          | [45.5 - 90.9] |
| Maximum number of consecutive clinical shifts scheduled to work |             |                              |               |
| 1                                                               | 52 (1.3)    | 63.6 (45.1 to 82.2)          | [27.3 - 90.9] |
| 2                                                               | 190 (4.6)   | 54.5 (47.6 to 61.5)          | [27.3 - 72.7] |
| 3                                                               | 465 (11.3)  | 63.6 (60.3 to 67.0)          | [36.4 - 81.8] |
| 4                                                               | 783 (19)    | 63.6 (63.0 to 64.3)          | [45.5 - 81.8] |
| 5                                                               | 827 (20.1)  | 72.7 (66.2 to 79.3)          | [45.5 - 81.8] |
| 6                                                               | 389 (9.5)   | 72.7 (67.3 to 78.2)          | [45.5 - 90.0] |
| 7                                                               | 855 (20.8)  | 72.7 (70.8 to 74.6)          | [45.5 - 90.9] |
| 8                                                               | 554 (13.5)  | 72.7 (66.5 to 78.9)          | [54.5 - 90.9] |
| Missing                                                         | 132 (3.2)   | 72.7 (67.9 to 77.6)          | [54.5 - 90.9] |

<sup>1</sup> Bootstrapped 95% confidence intervals based on 1000 replications on a minimum of 8 observations.

Only 7.5% of the participants were aged over 50 years, and the majority were aged between 26 and 30 years (28.6%). NFR score appeared to decrease with age, such that those in age groups 20 to 35 years all had a median score of 72.7, age groups 36 to 55 had a median score of 63.6, and those over 55 years had a median score of 54.5 (figure 1a). There was a reasonable balance between males and females, with just over 1% who did not submit a response (missing), preferred not to say or other. Females had a higher median NFR score of 72.7 (95% CI: 70.5 to 75.0) compared with males 63.6 (95% CI: 60.8 to 66.5) (figure 1b). Within clinical grade, consultants accounted for over a quarter of the participants who (with GPs) had the lowest median NFR score of 54.5 (consultants 95% CI: 53.6 to 55.5) compared with 72.7 in all other grades (figure 1c). The majority of participants had no long-term health conditions or

1  
2  
3 357 disability (88.6%), with a lower NFR score of 63.6 (95% CI 60.2 to 67.1)  
4  
5 358 compared with those who did report a long-term health condition or disability  
6  
7 359 72.7 (95% CI: 66.2 to 79.2) (figure 1d). Most participants worked full time  
8  
9 360 (83.5%), but overall, the NFR score did not decrease as contract proportion  
10  
11 361 decreased (table 2). Over half (54.6%) had been working in their current ED for  
12  
13 362 1 year or less and generally had higher NFR scores compared to those present  
14  
15 363 for over 1 year. Less than 35% of participants declared significant caring  
16  
17 364 responsibilities outside of work, but those who do had a lower median NFR  
18  
19 365 score (63.6, 95% CI: 62.8 to 64.5) than those who did not (72.7, 95% CI: 68.5  
20  
21 366 to 77.0).  
22  
23  
24  
25  
26

27 367 Most of the participants agreed or strongly agreed they were able to  
28  
29 368 obtain study or annual leave when requested (68% and >73%, respectively).  
30  
31 369 As the ability to obtain study and annual leave on request increased, the NFR  
32  
33 370 score decreased from 81.8 (95% CI: 81.4 to 82.2) to 54.5 (95% CI: 49.4 to 59.7)  
34  
35 371 for study leave and 81.8 (95% CI: 76.4 to 87.2) to 60.0 (95% CI: 51.8 to 68.2)  
36  
37 372 for annual leave (figures 2a and 2b). There was evidence the NFR score  
38  
39 373 increased as the proportion of time working out-of-hours increased, from 54.5  
40  
41 374 (95% CI: 47.8 to 61.3) to 81.8 (95% CI: 75.4 to 88.3) (figure 2c). Over 75% of  
42  
43 375 participants spent the majority of their time in adult EM with a median NFR  
44  
45 376 score of 72.7 for mixed or adult only, which was higher when compared with  
46  
47 377 paediatrics only 63.6 (95% CI: 55.2 to 72.1) (figure 2d). Most participants  
48  
49 378 worked 1 in 2 weekends (36%) with a median NFR score of 72.7, which  
50  
51 379 decreased to 54.5 for those who did not work any weekend shifts (see table 3).  
52  
53 380 Over 50% reported working 5 to 8 consecutive clinical shifts and had a median  
54  
55  
56  
57  
58  
59  
60

381 NFR score of 72.7, compared with those who worked less than five who had a  
382 median NFR  $\leq$  63.6.

383 The summary statistics of the final regression model are presented in  
384 table 4.

385 **Table 4: Summary of final Gaussian, mixed effects, linear regression model fitted to the**  
386 **Need for Recovery (NFR) score, including the adjusted coefficient estimate (Adj. Coef.**  
387 **Est.) with corresponding 95% confidence interval (CI) and p-value.**

|                                                                                | Adj. Coeff. Est. (95% CI) <sup>1</sup> | P-value <sup>2</sup> |
|--------------------------------------------------------------------------------|----------------------------------------|----------------------|
| Constant<br>(baseline NFR score)                                               | 59.51(55.53 to 63.49)                  | < 0.001              |
| Gender (baseline = Male)                                                       |                                        |                      |
| • Female                                                                       | 3.40(1.80 to 4.99)                     | < 0.001              |
| • Other/Prefer not to say                                                      | -0.46(-9.07 to 8.15)                   | 0.916                |
| Any long-term health conditions or disabilities (baseline = No)                |                                        |                      |
| • Yes                                                                          | 8.52(5.67 to 11.36)                    | < 0.001              |
| • Prefer not to say                                                            | 6.24(1.52 to 10.95)                    | 0.01                 |
| ED paediatrics only? (baseline = No)                                           |                                        |                      |
| • Yes                                                                          | -7.08(-10.4 to -3.77)                  | < 0.001              |
| Clinical grade (baseline = Foundation)                                         |                                        |                      |
| • ST1-ST2                                                                      | -0.08(-2.67 to 2.51)                   | 0.953                |
| • > ST2                                                                        | 1.32(-1.37 to 4.01)                    | 0.336                |
| • SASG                                                                         | -1.13(-4.27 to 2.02)                   | 0.482                |
| • GP                                                                           | -8.26(-15.09 to -1.44)                 | 0.018                |
| • Consultant                                                                   | -5.30(-8.07 to -2.53)                  | < 0.001              |
| I have been able to request and take study when I wanted (baseline = Neutral)  |                                        |                      |
| • Strongly disagree                                                            | 4.23(-0.26 to 8.71)                    | 0.065                |
| • Disagree                                                                     | 3.72(0.29 to 7.15)                     | 0.034                |
| • Agree                                                                        | -1.32(-3.60 to 0.96)                   | 0.257                |
| • Strongly agree                                                               | -6.50(-9.43 to -3.56)                  | < 0.001              |
| I have been able to request and take annual when I wanted (baseline = Neutral) |                                        |                      |
| • Strongly disagree                                                            | 6.43(2.03 to 10.83)                    | 0.004                |
| • Disagree                                                                     | 1.13(-2.34 to 4.61)                    | 0.523                |
| • Agree                                                                        | -2.84(-5.54 to -0.14)                  | 0.039                |
| • Strongly agree                                                               | -4.89(-8.06 to -1.72)                  | 0.002                |
| Proportion of time spent working out-of-hours (baseline = 0-25%)               |                                        |                      |
| • 26-50%                                                                       | 5.74(3.13 to 8.35)                     | < 0.001              |

|           |                       |         |
|-----------|-----------------------|---------|
| • 51-75%  | 10.32(7.60 to 13.03)  | < 0.001 |
| • 76-100% | 14.45(10.97 to 17.92) | < 0.001 |

388 <sup>1</sup> Each coefficient estimate is adjusted for all other covariates in the model

389 <sup>2</sup> Null hypothesis: Adjusted Coefficient Estimate = 0 (i.e. is there statistically significant  
390 evidence this category differs from the baseline category)

391 <sup>ST1-ST2</sup> *Specialist training year 1-2 (this included physicians training in Anaesthetics, Emergency  
392 Medicine, Acute Medicine and General Practice)*

393 <sup>SASG</sup> *Staff grade, associate specialist and speciality grade*

394 <sup>GP</sup> *General Practitioner working within the ED*

395

396 This model was based on 3979 participants with complete data for all the  
397 included covariates. Quantile regression confirmed the direction and  
398 significance of the associations remained the same (Online Supplementary  
399 Material 5). Each covariate was adjusted for all other statistically significant  
400 associations. The results from this model indicated there were statistically  
401 significant associations between gender, health conditions, type of ED (adult  
402 or paediatric), clinical grade, access to annual and study leave, and time  
403 spent working out-of-hours. The model suggested that males, GPs or  
404 consultants, those working in paediatrics and those with no long-term health  
405 condition or disability had the lowest NFR score. The greatest increase in  
406 NFR score was associated with those who reported more than a 75%  
407 proportion of out-of-hours work (14.45: 95% CI 10.97 to 17.92). If participants  
408 strongly agreed they were able to obtain study leave upon request this  
409 reduced their NFR score by 6.5 (95% CI: 3.56 to 9.43) and annual leave could  
410 reduce their NFR score 4.89 (95% CI 1.72 to 8.06).

411

## 412 **DISCUSSION**

413 Emergency Physicians in the UK and Ireland have a higher NFR score than  
414 has been reported in any previously studied population.[11,33–37] Three

1  
2  
3 415 modifiable occupational factors were significantly associated with higher NFR  
4  
5 416 scores (poor access to annual leave, and study leave, and proportion of out-of-  
6  
7 417 hours work), and four further non-modifiable demographic factors were  
8  
9 418 associated with a decreased NFR score. These were the senior grade of EM  
10  
11 419 consultant, male gender, absence of long-term health condition or disability,  
12  
13 420 and working in a paediatric only ED.  
14  
15  
16  
17 421

18  
19 422 The NFR median score of 70 found in this study compares unfavourably with  
20  
21 423 multiple occupational groups and baseline population data from a large Dutch  
22  
23 424 validation study, [37] where the highest frequency of responses were observed  
24  
25 425 at the lower end of the scale. Previous measurement in shift workers (including  
26  
27 426 hospital nurses) showed significantly lower NFR scores, [13,33] as did studies  
28  
29 427 of heavy goods vehicle drivers and merchant seafarers, all with average NFR  
30  
31 428 scores in the range 36-44.[35,36]. Our findings are however congruent with our  
32  
33 429 own feasibility work completed in a single centre UK ED, reporting a median  
34  
35 430 NFR of 81.8 in all staff groups. [21] The impact of rising patient numbers and  
36  
37 431 overcrowding in UK and Ireland EDs is commonly reported, [39] but our findings  
38  
39 432 are the first to illustrate the impact of high work demand on physician's need to  
40  
41 433 recuperate from work and the modifiable factors which can mitigate this fatigue.  
42  
43  
44  
45  
46  
47 434

48  
49 435 The three modifiable occupational factors represent areas of autonomy  
50  
51 436 and control, correlating well with previous work establishing these as core  
52  
53 437 drivers to minimise physician workplace stress and ensure well-being. [2,40,41]  
54  
55 438 Prioritising change in these domains may result in NFR score reduction and  
56  
57 439 reduce negative effects on health and well-being, including occupational  
58  
59  
60

1  
2  
3 440 burnout. Whilst out-of-hours working is inherent and unavoidable in EM, the  
4  
5 441 linear relationship we observed suggests that any reduction may result in direct  
6  
7 442 improvements in NFR, and evidence-based strategies such as proportional  
8  
9 443 control of out-of-hours working, annualised rota patterns and/or provision of rest  
10  
11 444 facilities should therefore be considered urgently.[42–44]  
12  
13  
14  
15 445

16  
17 446 As NFR does not change with seniority prior to consultant level, this  
18  
19 447 indicates that factors that could be postulated to influence work stress in  
20  
21 448 postgraduate training such as increased responsibility, management roles and  
22  
23 449 experience, appear to have a limited influence on NFR. It is therefore possible  
24  
25 450 that the reduction in NFR seen in those at consultant level supports the  
26  
27 451 hypothesis that broader perceptions of job autonomy and control, may be  
28  
29 452 explicitly linked to well-being in healthcare.[2,44] This correlates with our finding  
30  
31 453 that poor access to study and annual leave increases NFR, likely to be more  
32  
33 454 accessible at a senior level. Further areas merit exploration including the link to  
34  
35 455 out-of-hours working, influence of night and day shift proportions and possible  
36  
37 456 qualitative enquiry of personal experience and clinical performance.  
38  
39  
40  
41  
42  
43  
44

45 458 The relationship observed between gender and NFR is likely to be overly  
46  
47 459 simplistic requiring further evaluation. Presumed confounding variables  
48  
49 460 affecting this issue (such as a primary carer role and domestic responsibilities)  
50  
51 461 have been previously reported to be unrelated or protective against  
52  
53 462 maladaptive fatigue and are supported with findings from this study. [45]  
54  
55  
56  
57  
58  
59  
60

1  
2  
3 463 Awareness of the four demographic factors identified could be important at a  
4  
5 464 departmental planning level and increase advocacy for colleagues at greatest  
6  
7 465 risk of impaired well-being.  
8  
9

10 466

11  
12 467 The main strength of our study is inclusion of responses from over half  
13  
14 468 of all UK EDs, enhancing generalisability of our findings.[38] The high volume  
15  
16 469 of responses indicate the NFR scale as an 11-item survey, is an acceptable  
17  
18 470 measure for physicians, with over half of sites exceeding 70% response rates.  
19  
20 471 A key weakness is the single-point-of-time measurement, as seasonal bias may  
21  
22 472 have affected NFR scores. Furthermore, we acknowledge the disadvantages  
23  
24 473 of self-administered dichotomous questionnaires which may limit the richness  
25  
26 474 of insights.[46,47] Open-ended questions may be desirable in future survey  
27  
28 475 iterations.  
29  
30  
31  
32

33 476

34  
35 477 We have identified simple interventions that may reduce NFR. The  
36  
37 478 straightforward construction and interpretation, ease of administration and  
38  
39 479 completion confers advantages of the NFR scale over more complex well-being  
40  
41 480 inventories allowing for quick assessment of a workforce NFR, especially in a  
42  
43 481 busy clinical environment. Where identified to be high and interventions initiated  
44  
45 482 such as a rota change, the NFR scale can be easily repeated to confirm or  
46  
47 483 refute the impact, and may identify further areas resulting in continual  
48  
49 484 improvement whilst minimising survey respondent fatigue.  
50  
51  
52

53 485

54  
55 486 Future areas of work will include analysis of the NFR findings in  
56  
57 487 relationship to well-being and burnout. Any future work should also include  
58  
59  
60



1  
2  
3 488 other ED staff groups and physician groups to gain a broader picture across  
4  
5 489 the multi-professional team.  
6  
7

8 490

9  
10 491 In conclusion, this study provides a robust estimate of the NFR for  
11  
12 492 Emergency Physicians in the UK and Ireland, which is higher than any  
13  
14 493 occupation reported to date. Several potentially modifiable occupational  
15  
16 494 characteristics were associated with higher NFR, and future work to assess the  
17  
18 495 impact of modifying these factors will inform strategies to reduce NFR. In time  
19  
20 496 this may lead to improved long-term physician well-being and enhanced staff  
21  
22  
23 497 retention.  
24  
25  
26  
27  
28  
29  
30  
31  
32  
33  
34  
35  
36  
37  
38  
39  
40  
41  
42  
43  
44  
45  
46  
47  
48  
49  
50  
51  
52  
53  
54  
55  
56  
57  
58  
59  
60

1  
2  
3 498 **Funding statement:**  
4

5 499 This project was funded through a grant from the Royal College of Emergency  
6  
7 500 Medicine (RCEM) (Reference number: G/2018/1). This study was independent  
8  
9 501 of RCEM, and the sponsor had no role in the design of this study and no role  
10  
11 502 during its execution, analyses, interpretation of the data, or decision to submit  
12  
13 503 results.  
14  
15  
16

17 504

18  
19 505 **Competing interests:**  
20

21 506 All authors have completed the ICMJE uniform disclosure form and declare: no  
22  
23 507 support from any organisation for the submitted work; TR has received 50%  
24  
25 508 salary funding for two years as the Trainee Emergency Research Network  
26  
27 509 fellow from the Royal College of Emergency Medicine; DH reports an honorary  
28  
29 510 role as the Professor of the Royal College of Emergency Medicine during the  
30  
31 511 conduct of this study; no other relationships or activities that could appear to  
32  
33 512 have influenced the submitted work.  
34  
35  
36

37 513

38  
39  
40 514 **Patient and Public Involvement statement:**  
41

42 515 The concept of the research was presented to over 100 members of the  
43  
44 516 public at a Research & Development PPI Conference on 20<sup>th</sup> September  
45  
46 517 2018. Participants were supportive of the concept of the study, and no  
47  
48 518 concerns were raised. Further public and stakeholder engagement took place  
49  
50 519 through a workshop held at the UK Emergency Medicine Trainees Association  
51  
52 520 Annual Conference in December 2018, this influenced the outcome measures  
53  
54 521 and survey design including the removal of a formal burnout inventory due to  
55  
56  
57  
58  
59  
60

1  
2  
3 522 perceptions and experience of respondent fatigue in the target participant  
4  
5 523 group.

6  
7  
8 524

9  
10 525 **Ethics Approval:**

11  
12 526 This study protocol was submitted through the Integrated Research Application  
13  
14 527 System (IRAS), IRAS number 262048 and received proportionate ethical  
15  
16 528 approval by the Health Research Authority and Health and Care Research  
17  
18 529 Wales, Research Ethics Committee reference 19/HRA/2404 and equivalent  
19  
20 530 approvals in Scotland, Northern Ireland and Ireland. All participants provided  
21  
22 531 informed consent prior to beginning the survey  
23  
24  
25

26 532

27  
28 533 **Data sharing:**

29  
30 534 De-identified participant level data by site will be made available on  
31  
32 535 reasonable request through the study team ([tern@rcem.ac.uk](mailto:tern@rcem.ac.uk)). Data will be  
33  
34 536 available for researchers whose proposed use of the data has been approved  
35  
36 537 by the study team.  
37  
38  
39

40 538

41  
42 539 **Transparency statement:**

43  
44 540 The lead author, Dr Laura Cottey, and the co-authors affirm that this manuscript  
45  
46 541 is an honest, accurate, and transparent account of the study being reported;  
47  
48 542 that no important aspects of the study have been omitted; and that any  
49  
50 543 discrepancies from the study as planned have been explained.  
51  
52

53 544

54  
55  
56 545  
57  
58  
59  
60

1  
2  
3 546 **Dissemination to participants and related patient and public**

4  
5 547 **communities:**

6  
7 548 The authors are unable to disseminate the result of the research to study  
8  
9 549 participants directly, but the results will be made publicly available through  
10  
11 550 open access publication and dissemination of the results through site principal  
12  
13 551 investigators and social media.  
14  
15  
16

17 552

18  
19 553 **Acknowledgments:**

20  
21 554 The authors would like to thank the Royal College of Emergency Medicine  
22  
23 555 and University Hospitals Plymouth NHS Trust Research and Development  
24  
25 556 Department for their support with the study. In addition, we like to thank the  
26  
27 557 following individuals for study input: Professor Jason E Smith for providing  
28  
29 558 feedback on study design; Victoria Yates and Dr Chris Rollinson for their  
30  
31 559 support as study sponsorship team; Mark Mills for conducting data analysis  
32  
33 560 for the feasibility work; Dr Ffion Barham for providing assistance with initial  
34  
35 561 data analysis; Professor Marc van Veldhoven for kind permission to use the  
36  
37 562 Need for Recovery scale. Finally, we would like to acknowledge I-TERN, for  
38  
39 563 their invaluable support recruiting patients to the study within Ireland.  
40  
41  
42  
43  
44

45 564

46  
47 565 **Contributors:**

48  
49 566 LC, TR and BG contributed to the development of the study design, data  
50  
51 567 collection and analysis, the first draft of the manuscript and subsequent revised  
52  
53 568 versions. DH and JML contributed to the development of the study design, data  
54  
55 569 analysis, the first draft of the manuscript and subsequent revised versions. MDL  
56  
57 570 contributed to survey development, data collection and final version of  
58  
59  
60

1  
2  
3 571 manuscript; KS and DE provided the statistical analysis plan and contributed to  
4  
5 572 data analysis, the first draft of the manuscript and subsequent revised versions.  
6  
7  
8 573 All authors approved the final version of the manuscript for submission. LC is  
9  
10 574 the guarantor. TERN and PERUKI collaborators contributed to local study  
11  
12 575 promotion and participant recruitment.  
13  
14  
15 576

16  
17 577 **List of Trainee Emergency Research Network and Paediatric Emergency**  
18  
19 578 **Research in the UK and Ireland collaborators**

20 579  
21  
22 580 **Site study leads**

23  
24 581 L Kane (Aberdeen Royal Infirmary); S Richter, J Selway (Addenbrooke's  
25  
26 582 Hospital, Cambridge); C Rimmer (Aintree Hospital, Liverpool); M Ayres  
27  
28 583 (Airedale General Hospital, West Yorkshire); C Ponami (Barking, Havering  
29  
30 584 and Redbridge University Hospitals NHS Trust); A Quartermain (Basingstoke  
31  
32 585 and North Hampshire Hospital); K Kaur (Bedford Hospital); S Hartshorn  
33  
34 586 (Birmingham Children's Hospital); K McGregor (Bradford Royal Infirmary); G  
35  
36 587 Gardner (Bristol Royal Hospital for Children), T Clingo (Bristol Royal  
37  
38 588 Infirmary); R Stewart (Chelsea & Westminster Hospital); N Mullen (South  
39  
40 589 Tyneside and Sunderland NHS Foundation Trust); K Mirza (Colchester  
41  
42 590 Hospital); T Hussan (County Durham and Darlington NHS Foundation Trust);  
43  
44 591 P Cuthbert (Craigavon Area Hospital, County Armagh); M Alex (Croydon  
45  
46 592 University Hospital); F Barham (Derriford Hospital, Plymouth), A Bayston  
47  
48 593 (Doncaster and Bassetlaw Hospital NHS Trust); K Veeramuthu (East Surrey  
49  
50 594 Hospital); R Macfarlane (Epsom and St Helier NHS Trust); J Criddle (Evelina  
51  
52 595 London Children's Hospital); G Lipton (Forth Valley Royal Hospital); K New  
53  
54 596 (Frimley Park Hospital); M Jee Poh Hock, Etimbuk Umana (Galway University  
55  
56 597 Hospital, Republic of Ireland); C Ward (Glasgow Royal Infirmary); V Agosti, M  
57  
58 598 Connelly (Gloucestershire Hospitals Foundation Trust); C Weegenaar (Great  
59  
60 599 Western Hospital, Swindon); J Kerr (Hampshire Hospitals NHS Trust); SJ  
600  
601 600 Dhutia, T Owens (Homerton University Hospital); B Cherian (Hull University  
602  
603 601 Teaching Hospital); U Basit, D Hartin (Ipswich Hospital); O Williams (James  
604  
605 602 Cook University Hospital, Middlesbrough); C Lindsay (James Paget University

1  
2  
3 603 Hospital); F Cante (King's College Hospital, London); S Manou (Leeds  
4  
5 604 Teaching Hospitals NHS Trust); MH Elwan, C Nunn (Leicester Royal  
6  
7 605 Infirmary); R Fuller (Leighton Hospital, Crewe); S Stevenson (Limerick  
8  
9 606 Regional Hospital, Republic of Ireland); C Reynard (Manchester University  
10  
11 607 NHS Foundation Trust); J Daly (Mater Misericordiae University Hospital,  
12  
13 608 Republic of Ireland); A Da'Costa (Medway Foundation NHS Trust); L How  
14  
15 609 (Milton Keynes Hospital); G Boggaram, D McConnell (Musgrove Park  
16  
17 610 Hospital, Taunton); R Hirst, K Thomas (North Bristol NHS Trust); R Campbell,  
18  
19 611 J Muller, S Taylor (North Middlesex University Hospital); H Chatha (Northern  
20  
21 612 General Hospital, Sheffield); R Grimwood (Northumbria Specialist Emergency  
22  
23 613 Care Hospital); F Fadhilillah (Northwick Park Hospital); S Ojo (Nottingham  
24  
25 614 University Hospitals Trust); A Paul, S Ramsundar (Oxford University  
26  
27 615 Hospital); A Blackwell, DSD Ranasinghe (Queen Alexandra Hospital,  
28  
29 616 Portsmouth); S Hall (Queen Elizabeth Hospital, Woolwich); I Traiforos (Queen  
30  
31 617 Elizabeth University Hospital, Glasgow); E Walton (Royal Alexandra  
32  
33 618 Children's Hospital, Brighton); T Sparkes (Royal Berkshire Hospital); L Barrett  
34  
35 619 (Royal Blackburn Hospital); M Sheikh (Royal Bolton Hospital); J Driessen  
36  
37 620 (Royal Cornwall Hospital); S Meredith, C Newbury (University of Derby and  
38  
39 621 Burton Hospitals Trust); H Grimsmo-Powney, H Malik (Royal Devon and  
40  
41 622 Exeter Hospital); L Gwatkin (Royal Gwent Hospital); R Blackburn, L  
42  
43 623 McKechnie (Royal Hospital for Children, Glasgow); J Browning (Royal  
44  
45 624 Hospital for Sick Children, Edinburgh); F Gillies (Royal Infirmary of  
46  
47 625 Edinburgh); TF McLoughlin (Royal Liverpool University Hospital); SM Rahman  
48  
49 626 (Royal London Hospital); K Hopping (Royal Manchester Children's Hospital);  
50  
51 627 M Broyde (Royal Oldham Hospital); K Challen, M Macdonald (Royal Preston  
52  
53 628 Hospital); A Randle (Royal Shrewsbury Hospital); E Timony-Nolan (Royal  
54  
55 629 Sussex County Hospital, Brighton); H Fairbairn (Royal United Hospital, Bath);  
56  
57 630 G Gracey (Royal Victoria Hospital, Belfast); K Clayton, J Thompson (Royal  
58  
59 631 Victoria Infirmary Hospital, Newcastle); C Kennedy (Salford Royal Hospital); S  
60  
632 Gray (Salisbury NHS Foundation Trust); C Magee (Sandwell General  
633  
634 Hospital, Birmingham); G Hartshorne (Sheffield Children's Hospital); J Foley  
635  
636 (Sligo University Hospital, Republic of Ireland); S Gardner, S Pintus, K Scott  
(Southport & Ormskirk Hospital); K Brammer, A Raghunathan (St Georges  
Hospital, Tooting); S Langston (St Helen's and Knowsley NHS Trust); F Gillies

1  
2  
3 637 (St John's Hospital, Livingston); J Patel (St Marys Hospital, London); A Knight  
4  
5 638 (St Richards Hospital, Chichester); S Saunder, C Thomas (St Thomas'  
6  
7 639 Hospital, London); C Szekeres (Surrey and Sussex NHS Trust); P Fitzpatrick  
8  
9 640 (Temple Street Children's Hospital); L Kehler (The Royal Wolverhampton  
10  
11 641 NHS Trust); H Cooper (Tunbridge Wells Hospital); B O'Hare (Ulster Hospital);  
12  
13 642 A Arumugam, C Leech (University Hospitals Coventry and Warwickshire NHS  
14  
15 643 Trust); Y Moulds, DL Thom (University Hospital Crosshouse); N Ali (University  
16  
17 644 Hospital Lewisham, London); A Mackay (University Hospital Monklands); J  
18  
19 645 Norton (University Hospital of North Midlands); E Frost, R Wright (University  
20  
21 646 Hospital Southampton); CE Davies, A Hanks, E Murray (University Hospital of  
22  
23 647 Wales); A Saunders (Victoria Hospital, Kirkcaldy); KI Malik (West Suffolk  
24  
25 648 Hospital); IMV Asif (West Middlesex Hospital); S Manouchehri (Wexham Park  
26  
27 649 Hospital); A Fatkin, S Lewis (Whiston Hospital); S Naeem (William Harvey  
28  
29 650 Hospital, Ashford); A Basu (Wrexham Maelor Hospital); N Cherian, O Hill  
30  
31 651 (Wythenshawe Hospital, Manchester); C Boulind (Yeovil District Hospital); P  
32  
33 652 Williams (Ysbyty Gwynedd Hospital)

653

**Data collectors**

654

655  
36 656 S Hardwick, C Gandolfi (Addenbrooke's Hospital, Cambridge); E  
37  
38 657 Everitt (Aintree Hospital, Liverpool); R Hughes (Betsi Cadwaladr University  
39  
40 658 Hospital); E Williams (Bristol Royal Hospital for Children), A Ghosh  
41  
42 659 (Colchester Hospital); G Hampton, D McKeever, D Purdy, L Savage  
43  
44 660 (Craigavon Area Hospital); S Bailey (Derriford Hospital, Plymouth); J Leung  
45  
46 661 (East Kent Hospitals); L Brown, P Harris, R Sharr (East Surrey Hospital); R  
47  
48 662 Loffhagen (Gloucestershire Hospitals Foundation Trust); V Rivers (Ipswich  
49  
50 663 Hospital); HD Khan, K Vincent (Leicester Royal Infirmary), H  
51  
52 664 Baird (Manchester University NHS Foundation Trust); J Foot (Musgrove Park  
53  
54 665 Hospital, Taunton); S Bury, E Grocholski, G Kamalatharan (Northwick Park  
55  
56 666 Hospital); MU Khan (Nottingham University Hospitals Trust); J Gaiawyn  
57  
58 667 (Royal Cornwall Hospital); G Johnson, A Tabner (University of Derby and  
59  
60 668 Burton Hospitals Trust); L Abraham (Royal Devon and Exeter Hospital); N  
669  
670 669 Sexton (Royal Liverpool University Hospital); A Akhtar (Royal Victoria  
Hospital, Belfast); C de Buitleur (Sligo University Hospital, Republic of Ireland);

1  
2  
3 671 B Clarke, M Colmar (St John's Hospital, Livingston); Z Haslam, M Morrison  
4 (Southport & Ormskirk NHS Trust); K Veermuthu (Surrey and Sussex  
5 672 (Southport & Ormskirk NHS Trust); K Veermuthu (Surrey and Sussex  
6 673 Healthcare Trust); D Raffo, J Stafford (Ulster Hospital, Belfast); S McIntock  
7 (University Hospitals Coventry and Warwickshire NHS Trust); R Bond, OR  
8 674 (University Hospitals Coventry and Warwickshire NHS Trust); R Bond, OR  
9 Griffiths, B McIlwham (University Hospital Wales); K Cunningham (Victoria  
10 675 Griffiths, B McIlwham (University Hospital Wales); K Cunningham (Victoria  
11 Hospital, Kirkcaldy); E Clegg (Wythenshawe Hospital)  
12 676 Hospital, Kirkcaldy); E Clegg (Wythenshawe Hospital)  
13 677  
14  
15  
16 678

## 679 REFERENCES

- 680  
681 1 The King's Fund. The health care workforce in England: Make or  
682 Break? 2018. [https://www.kingsfund.org.uk/publications/health-care-](https://www.kingsfund.org.uk/publications/health-care-workforce-england)  
683 workforce-england (accessed 27 May 2020).  
684 2 UK-wide review of doctors and medical students wellbeing - GMC.  
685 2019. [https://www.gmc-uk.org/about/how-we-work/corporate-strategy-](https://www.gmc-uk.org/about/how-we-work/corporate-strategy-plans-and-impact/supporting-a-profession-under-pressure/uk-wide-review-of-doctors-and-medical-students-wellbeing)  
686 plans-and-impact/supporting-a-profession-under-pressure/uk-wide-  
687 review-of-doctors-and-medical-students-wellbeing (accessed 27 May  
688 2020).  
689 3 Ramirez AJ, Graham J, Richards MA, *et al*. Mental health of hospital  
690 consultants: The effects of stress and satisfaction at work. *Lancet*  
691 1996;347:724–8. doi:10.1016/S0140-6736(96)90077-X  
692 4 Salen P, Norman K. The Impact of Fatigue on Medical Error and  
693 Clinician Wellness: A Vignette-Based Discussion. In: *Vignettes in*  
694 *Patient Safety - Volume 2*. 2018. doi:10.5772/intechopen.70712  
695 5 Arora M, Asha S, Chinnappa J, *et al*. Review article: Burnout in  
696 emergency medicine physicians. *Emerg Med Australas* 2013;25:491–5.  
697 doi:10.1111/1742-6723.12135  
698 6 Han S, Shanafelt TD, Sinsky CA, *et al*. Estimating the attributable cost  
699 of physician burnout in the United States. *Ann Intern Med* Published  
700 Online First: 2019. doi:10.7326/M18-1422  
701 7 Rotenstein LS, Torre M, Ramos MA, *et al*. Prevalence of burnout  
702 among physicians a systematic review. *JAMA* 2018;320:1131–50.  
703 doi:10.1001/jama.2018.12777



- 1  
2  
3 704 8 Shanafelt TD, Hasan O, Dyrbye LN, *et al.* Changes in Burnout and  
4 Satisfaction with Work-Life Balance in Physicians and the General US  
5 705 Working Population between 2011 and 2014. *Mayo Clin Proc*  
6 706 2015;**90**:1600–13. doi:10.1016/j.mayocp.2015.08.023  
7 707  
8 708 9 The Lancet T. Physician burnout: a global crisis. *Lancet* 2019;394:93.  
9 709 doi:10.1016/S0140-6736(19)31573-9  
10 710 10 West CP, Dyrbye LN, Erwin PJ, *et al.* Interventions to prevent and  
11 711 reduce physician burnout: a systematic review and meta-analysis.  
12 712 *Lancet* 2016;388:2272–81. doi:10.1016/S0140-6736(16)31279-X  
13 713 11 Sluiter JK, Van Der Beek AJ, Frings-Dresen MHW. The influence of work  
14 714 characteristics on the need for recovery and experienced health: A  
15 715 study on coach drivers. *Ergonomics* 1999;42:573–83.  
16 716 doi:10.1080/001401399185487  
17 717 12 Jansen NWH, Kant I, Van Amelsvoort LGPM, *et al.* Need for recovery  
18 718 from work: Evaluating short-term effects of working hours, patterns and  
19 719 schedules. *Ergonomics* 2003;46:664–80  
20 720 doi:10.1080/0014013031000085662  
21 721 13 Sluiter JK, De Croon EM, Meijman TF, *et al.* Need for recovery from  
22 722 work related fatigue and its role in the development and prediction of  
23 723 subjective health complaints. *Occup Environ Med* 2003; 60(Suppl 1):  
24 724 i62–i70 doi:10.1136/oem.60.suppl\_1.i62  
25 725 14 Sluiter JK, Frings-Dresen MH, van der Beek AJ, *et al.* The relation  
26 726 between work-induced neuroendocrine reactivity and recovery,  
27 727 subjective need for recovery, and health status. *J Psychosom Res*  
28 728 2001;50:29–37. doi:10.1016/s0022-3999(00)00213-0  
29 729 15 GMC. General Medical Council. National training surveys 2019: Initial  
30 730 findings report. 2019. [https://www.gmc-uk.org/-/media/gmc-site-](https://www.gmc-uk.org/-/media/gmc-site-images/about/national-training-surveys-initial-findings-report-20190705_2.pdf?la=en&hash=8455783A3C4DE2CC55A38ACB9ACF5D0B391744B0)  
31 731 [images/about/national-training-surveys-initial-findings-report-](https://www.gmc-uk.org/-/media/gmc-site-images/about/national-training-surveys-initial-findings-report-20190705_2.pdf?la=en&hash=8455783A3C4DE2CC55A38ACB9ACF5D0B391744B0)  
32 732 [20190705\\_2.pdf?la=en&hash=8455783A3C4DE2CC55A38ACB9ACF5](https://www.gmc-uk.org/-/media/gmc-site-images/about/national-training-surveys-initial-findings-report-20190705_2.pdf?la=en&hash=8455783A3C4DE2CC55A38ACB9ACF5D0B391744B0)  
33 733 [D0B391744B0](https://www.gmc-uk.org/-/media/gmc-site-images/about/national-training-surveys-initial-findings-report-20190705_2.pdf?la=en&hash=8455783A3C4DE2CC55A38ACB9ACF5D0B391744B0) (accessed 27 May 2020).  
34 734 16 Williamson K, Lank PM, Cheema N, *et al.* Comparing the Maslach  
35 735 Burnout Inventory to other well-being instruments in emergency  
36 736 medicine residents. *J Grad Med Educ*  
37 737 2018;10:532–6.

- 1  
2  
3 738 17 Boutou A, Pitsiou G, Sourla E, Kioumis I. Burnout syndrome among  
4 739 emergency medicine physicians: an update on its prevalence and risk  
5 740 factors. *Eur Rev Med Pharmacol Sci* 2019 Oct;23:9058-65.
- 6  
7  
8 741 18 Panagioti M, Panagopoulou E, Bower P, *et al*. Controlled interventions  
9 742 to reduce burnout in physicians a systematic review and meta-analysis.  
10 743 *JAMA Intern Med* 2017;177:195–205.  
11 744 doi:10.1001/jamainternmed.2016.7674
- 12  
13  
14  
15 745 19 Dewa CS, Jacobs P, Thanh NX, *et al*. An estimate of the cost of burnout  
16 746 on early retirement and reduction in clinical hours of practicing  
17 747 physicians in Canada. *BMC Health Serv Res* 2014;14.  
18 748 doi:10.1186/1472-6963-14-254
- 19  
20  
21  
22 749 20 National Academies of Sciences E and M. *Taking Action Against*  
23 750 *Clinician Burnout*. Washington, D.C. National Academies Press 2019.  
24 751 doi:10.17226/25521
- 25  
26  
27 752 21 Graham B, Cottey L, Smith JE, *et al* Measuring ‘Need for Recovery’ as  
28 753 an indicator of staff well-being in the emergency department: a survey  
29 754 study. *Emerg Med J* Published Online First:  
30 755 2020. doi: 10.1136/emered-2019-208797
- 31  
32  
33  
34 756 22 Smith J, Keating L, Flowerdew L on behalf of the JLA EM PSP Steering  
35 757 Group, *et al* An Emergency Medicine Research Priority Setting  
36 758 Partnership to establish the top 10 research priorities in emergency  
37 759 medicine. *Emerg Med J* 2017;34:454-456.
- 38  
39  
40  
41 760 23 Eysenbach G. Improving the Quality of Web Surveys: The Checklist for  
42 761 Reporting Results of Internet E-Surveys (CHERRIES). *J Med Internet*  
43 762 *Res* 2004;6:e34. doi:10.2196/jmir.6.3.e34
- 44  
45  
46 763 24 Medicine RC of E. Essential Facts Regarding A&E Services.  
47 764 2018. <https://www.rcem.ac.uk/docs/Policy/England Factsheet 2018.pdf>  
48 765 (accessed 27 May 2020).
- 49  
50  
51 766 25 Cottey L, Vassallo J, Roberts T, Horner D, Tabner A. About TERN? -  
52 767 RCEMLearning. <https://www.rcemlearning.co.uk/foamed/about-tern/>  
53 768 (accessed 27 May 2020)
- 54  
55  
56 769 26 Lyttle MD, O’Sullivan R, Hartshorn S, *et al*. Pediatric Emergency  
57 770 Research in the UK and Ireland (PERUKI): Developing a collaborative  
58 771 for multicentre research. *Arch Dis Child* 2014;99:602–3.

- 1  
2  
3 772 doi:10.1136/archdischild-2013-304998  
4  
5 773 27 Van Veldhoven M, Meijman TF. *Het meten van psychosociale*  
6  
7 774 *arbeidsbelasting met een vragenlijst: De Vragenlijst Beleving en*  
8  
9 775 *Beoordeling van de Arbeid (VBBA). [Questionnaire on Perception and*  
10  
11 776 *Judgement of Work]*. 1994.  
12  
13 777 28 Van Veldhoven M, Broersen S. Measurement quality and validity of the  
14  
15 778 “need for recovery scale”. *Occup Environ Med* 2003;**60**:i3-i9.  
16  
17 779 doi:10.1136/oem.60.suppl\_1.i3  
18  
19 780 29 Harris PA, Taylor R, Minor BL, *et al*. The REDCap consortium: Building  
20  
21 781 an international community of software platform partners. *J Biomed*  
22  
23 782 *Inform* 2019;**95**:103208. doi:10.1016/J.JBI.2019.103208  
24  
25 783 30 Harris PA, Taylor R, Thielke R, *et al*. Research electronic data capture  
26  
27 784 (REDCap)—A metadata-driven methodology and workflow process for  
28  
29 785 providing translational research informatics support. *J Biomed Inform*  
30  
31 786 2009;**42**:377–81. doi:10.1016/J.JBI.2008.08.010  
32  
33 787 31 StataCorp. Stata Statistical Software: Release 14. College Station, TX:  
34  
35 788 StataCorp LP. 2015. 2015. doi:10.2307/2234838  
36  
37 789 32 Van Der Starre RE, Coffeng JK, Hendriksen IJ, *et al*. Associations  
38  
39 790 between overweight, obesity, health measures and need for recovery in  
40  
41 791 office employees: A cross-sectional analysis. *BMC Public Health*  
42  
43 792 Published Online First: 2013. doi:10.1186/1471-2458-13-1207  
44  
45 793 33 Moriguchi CS, Trevizani T, De Fátima Carreira Moreira R, *et al*. Need  
46  
47 794 for recovery assessment among nursing professionals and call center  
48  
49 795 operators. In: *Work*. 2012. 4838–42. doi:10.3233/WOR-2012-0773-4838  
50  
51 796 34 Samadi H, Kalantari R, Mostafavi F, *et al*. Using the Need for Recovery  
52  
53 797 Scale to Assess Workload in Mine Workers and Its Relationship With  
54  
55 798 Demographics. *J Ergon* 2017;**4**:1–7. doi:10.21859/joe-04041  
56  
57 799 35 Bridger RS, Brasher K, Dew A. Work demands and need for recovery  
58  
59 800 from work in ageing seafarers. *Ergonomics* 2010;**53**:1006–15.  
60  
801 doi:10.1080/00140139.2010.493958  
802 36 De Croon EM, Sluiter JK, Frings-Dresen MHW. Need for recovery after  
803  
804 work predicts sickness absence: A 2-year prospective cohort study in  
805  
3999(02)00630-X

- 1  
2  
3 806 37 Jansen NWH, Kant IJ, van den Brandt PA. Need for recovery in the  
4  
5 807 working population: description and associations with fatigue and  
6  
7 808 psychological distress. *Int J Behav Med* 2002;9:322–40.
- 8  
9 809 38 Hassan T, Walker B, Harrison M, *et al.*  
10  
11 810 [www.rcem.ac.uk/docs/Policy/CEM7461-Stretched-to-the-limit-](http://www.rcem.ac.uk/docs/Policy/CEM7461-Stretched-to-the-limit-October_2013.pdf)  
12  
13 811 [October\\_2013.pdf](http://www.rcem.ac.uk/docs/Policy/CEM7461-Stretched-to-the-limit-October_2013.pdf). 2013.[www.rcem.ac.uk/docs/Policy/CEM7461-](http://www.rcem.ac.uk/docs/Policy/CEM7461-Stretched-to-the-limit-October_2013.pdf)  
14  
15 812 [Stretched-to-the-limit-October\\_2013.pdf](http://www.rcem.ac.uk/docs/Policy/CEM7461-Stretched-to-the-limit-October_2013.pdf) (accessed 27 Ma7 2020).
- 16  
17 813 39 The Royal College of Emergency Medicine. Improving safety in the  
18  
19 814 Emergency Department this winter: a guide for health service leaders  
20  
21 815 and boards. 2018.  
22  
23 816 [https://www.rcem.ac.uk/RCEM/Quality\\_Policy/Policy/Winter\\_Planning/R](https://www.rcem.ac.uk/RCEM/Quality_Policy/Policy/Winter_Planning/RCEM/Quality-Policy/Policy/Winter_Planning.aspx?hkey=e37845aa-c9a5-4b01-aa72-48137cc59aa1)  
24  
25 817 [CEM/Quality-Policy/Policy/Winter\\_Planning.aspx?hkey=e37845aa-](https://www.rcem.ac.uk/RCEM/Quality_Policy/Policy/Winter_Planning/RCEM/Quality-Policy/Policy/Winter_Planning.aspx?hkey=e37845aa-c9a5-4b01-aa72-48137cc59aa1)  
26  
27 818 [c9a5-4b01-aa72-48137cc59aa1](https://www.rcem.ac.uk/RCEM/Quality_Policy/Policy/Winter_Planning/RCEM/Quality-Policy/Policy/Winter_Planning.aspx?hkey=e37845aa-c9a5-4b01-aa72-48137cc59aa1) (accessed 23 July 2020)
- 28  
29 819 40 Hall LH, Johnson J, Heyhoe J, *et al.* Strategies to improve general  
30  
31 820 practitioner well-being: Findings from a focus group study. *Fam Pract*  
32  
33 821 Published Online First: 2018. doi:10.1093/fampra/cmz130
- 34  
35 822 41 Galletta M, Portoghese I, Fabbri D, *et al.* Empowering workplace and  
36  
37 823 wellbeing among healthcare professionals: The buffering role of job  
38  
39 824 control. *Acta Biomed* 2016;87:61–9.
- 40  
41 825 42 NHS Improvement. Annualised hours rotas for emergency department  
42  
43 826 doctors. 2019.  
44  
45 827 [https://improvement.nhs.uk/documents/5919/Brighton\\_\\_Sussex\\_-](https://improvement.nhs.uk/documents/5919/Brighton__Sussex_-_annualised_hours_rotas.pdf)  
46  
47 828 [\\_annualised\\_hours\\_rotas.pdf](https://improvement.nhs.uk/documents/5919/Brighton__Sussex_-_annualised_hours_rotas.pdf) (accessed 27 May 2020).
- 48  
49 829 43 Rimmer A. Government commits £10m to doctors' rest facilities. *BMJ*  
50  
51 830 2233 doi: <http://doi.org/10.1136/bmj.l2233>
- 52  
53 831 44 Smith E, Dasan S. A system under pressure. *Br J Hosp Med*  
54  
55 832 2018;79:495–9. doi:10.12968/hmed.2018.79.9.495
- 56  
57 833 45 Winwood PC, Winefield AH, Lushington K. Work-related fatigue and  
58  
59 834 recovery: The contribution of age, domestic responsibilities and  
60  
835 shiftwork. *J Adv Nurs* 2006;56:438–49. doi:10.1111/j.1365-  
836  
2648.2006.04011.x
- 837 46 Dykema J, Jones NR, Piché T, *et al.* Surveying Clinicians by Web:  
838  
839 Current Issues in Design and Administration. *Eval Heal Prof* Published  
Online First: 2013;36:352-81. doi:10.1177/0163278713496630

840 47 Klabunde CN, Willis GB, McLeod CC, *et al.* Improving the Quality of  
 841 Surveys of Physicians and Medical Groups: A Research Agenda. *Eval*  
 842 *Heal Prof* 2012;35:477-506 doi:10.1177/0163278712458283

843

844

845

846 Research Checklist: The Checklist for Reporting Results of Internet E-Surveys  
 847 (CHERRIES)

848

| <b>CHERRIES CHECKLIST ADAPTED FROM:</b>                                                                                                                                                                                            |                                  |                                                                                                                                                                                                                      |                                                                      |
|------------------------------------------------------------------------------------------------------------------------------------------------------------------------------------------------------------------------------------|----------------------------------|----------------------------------------------------------------------------------------------------------------------------------------------------------------------------------------------------------------------|----------------------------------------------------------------------|
| Eysenbach, Gunther. "Improving the quality of Web surveys: the Checklist for Reporting Results of Internet E-Surveys (CHERRIES)." <i>Journal of medical Internet research</i> vol. 6,3 e34. 29 Sep. 2004, doi:10.2196/jmir.6.3.e34 |                                  |                                                                                                                                                                                                                      |                                                                      |
| <b>Item Category</b>                                                                                                                                                                                                               | <b>Checklist Item</b>            | <b>Explanation</b>                                                                                                                                                                                                   | <b>Checklist Response</b>                                            |
| <b>Design</b>                                                                                                                                                                                                                      | Describe survey design           | Describe target population, sample frame. Is the sample a convenience sample? (In "open" surveys this is most likely.)                                                                                               | <b>Outlined in 'Methods'</b>                                         |
| <b>IRB (Institutional Review Board) approval and informed consent process</b>                                                                                                                                                      | IRB approval                     | Mention whether the study has been approved by an IRB.                                                                                                                                                               | <b>Outlined in 'Ethics Approval'</b>                                 |
|                                                                                                                                                                                                                                    | Informed consent                 | Describe the informed consent process. Where were the participants told the length of time of the survey, which data were stored and where and for how long, who the investigator was, and the purpose of the study? | <b>Outlined in Survey Distribution, monitoring and recruitment</b>   |
|                                                                                                                                                                                                                                    | Data protection                  | If any personal information was collected or stored, describe what mechanisms were used to protect unauthorized access.                                                                                              | <b>Outlined in Survey Distribution, monitoring and recruitment</b>   |
| <b>Development and pre-testing</b>                                                                                                                                                                                                 | Development and testing          | State how the survey was developed, including whether the usability and technical functionality of the electronic questionnaire had been tested before fielding the questionnaire.                                   | <b>Outlined in 'Survey Development'</b>                              |
| <b>Recruitment process and description of the sample having access to the questionnaire</b>                                                                                                                                        | Open survey versus closed survey | An "open survey" is a survey open for each visitor of a site, while a closed survey is only open to a sample which the investigator knows (password-protected survey).                                               | <b>Outlined in Survey Distribution, monitoring and recruitment</b>   |
|                                                                                                                                                                                                                                    | Contact mode                     | Indicate whether or not the initial contact with the potential participants was made on the Internet. (Investigators may also send out                                                                               | <b>Outlined in 'Survey Distribution, monitoring and recruitment'</b> |

|                              |                                          |                                                                                                                                                                                                                                                                                                                                                                                                                                               |                                                                      |
|------------------------------|------------------------------------------|-----------------------------------------------------------------------------------------------------------------------------------------------------------------------------------------------------------------------------------------------------------------------------------------------------------------------------------------------------------------------------------------------------------------------------------------------|----------------------------------------------------------------------|
|                              |                                          | questionnaires by mail and allow for Web-based data entry.)                                                                                                                                                                                                                                                                                                                                                                                   |                                                                      |
|                              | Advertising the survey                   | How/where was the survey announced or advertised? Some examples are offline media (newspapers), or online (mailing lists – If yes, which ones?) or banner ads (Where were these banner ads posted and what did they look like?). It is important to know the wording of the announcement as it will heavily influence who chooses to participate. Ideally the survey announcement should be published as an appendix.                         | <b>Outlined in 'Survey Distribution, monitoring and recruitment'</b> |
| <b>Survey administration</b> | Web/E-mail                               | State the type of e-survey (eg, one posted on a Web site, or one sent out through e-mail). If it is an e-mail survey, were the responses entered manually into a database, or was there an automatic method for capturing responses?                                                                                                                                                                                                          | <b>Outlined in 'Survey Distribution, monitoring and recruitment'</b> |
|                              | Context                                  | Describe the Web site (for mailing list/newsgroup) in which the survey was posted. What is the Web site about, who is visiting it, what are visitors normally looking for? Discuss to what degree the content of the Web site could pre-select the sample or influence the results. For example, a survey about vaccination on an anti-immunization Web site will have different results from a Web survey conducted on a government Web site | <b>Outlined in 'Design'</b>                                          |
|                              | Mandatory/voluntary                      | Was it a mandatory survey to be filled in by every visitor who wanted to enter the Web site, or was it a voluntary survey?                                                                                                                                                                                                                                                                                                                    | <b>Outlined in 'Survey Distribution, monitoring and recruitment'</b> |
|                              | Incentives                               | Were any incentives offered (eg, monetary, prizes, or non-monetary incentives such as an offer to provide the survey results)?                                                                                                                                                                                                                                                                                                                | <b>No</b>                                                            |
|                              | Time/Date                                | In what timeframe were the data collected?                                                                                                                                                                                                                                                                                                                                                                                                    | <b>Outlined in 'Sites and settings'</b>                              |
|                              | Randomization of items or questionnaires | To prevent biases items can be randomized or alternated.                                                                                                                                                                                                                                                                                                                                                                                      | <b>Not done</b>                                                      |
|                              | Adaptive questioning                     | Use adaptive questioning (certain items, or only conditionally displayed based on responses to other items) to reduce number and complexity of the questions                                                                                                                                                                                                                                                                                  | <b>Outlined in Survey Distribution, monitoring and recruitment</b>   |
|                              | Number of Items                          | What was the number of questionnaire items per page? The number of items is an important factor for the completion rate.                                                                                                                                                                                                                                                                                                                      | <b>Outlined in 'Design'</b>                                          |

|                            |                                                                                                           |                                                                                                                                                                                                                                                                                                                                                                                                                                                                                                                                |                                                                    |
|----------------------------|-----------------------------------------------------------------------------------------------------------|--------------------------------------------------------------------------------------------------------------------------------------------------------------------------------------------------------------------------------------------------------------------------------------------------------------------------------------------------------------------------------------------------------------------------------------------------------------------------------------------------------------------------------|--------------------------------------------------------------------|
|                            | Number of screens (pages)                                                                                 | Over how many pages was the questionnaire distributed? The number of items is an important factor for the completion rate.                                                                                                                                                                                                                                                                                                                                                                                                     | <b>Outlined in 'Design'</b>                                        |
|                            | Completeness check                                                                                        | It is technically possible to do consistency or completeness checks before the questionnaire is submitted. Was this done, and if "yes", how (usually JavaScript)? An alternative is to check for completeness after the questionnaire has been submitted (and highlight mandatory items). If this has been done, it should be reported. All items should provide a non-response option such as "not applicable" or "rather not say", and selection of one response option should be enforced.                                  | <b>Not done</b>                                                    |
|                            | Review step                                                                                               | State whether respondents were able to review and change their answers (eg, through a Back button or a Review step which displays a summary of the responses and asks the respondents if they are correct).                                                                                                                                                                                                                                                                                                                    | <b>Outlined in Survey Distribution, monitoring and recruitment</b> |
| <b>Response rates</b>      |                                                                                                           |                                                                                                                                                                                                                                                                                                                                                                                                                                                                                                                                |                                                                    |
|                            | Unique site visitor                                                                                       | If you provide view rates or participation rates, you need to define how you determined a unique visitor. There are different techniques available, based on IP addresses or cookies or both.                                                                                                                                                                                                                                                                                                                                  | <b>Outlined in 'Results'</b>                                       |
|                            | View rate (Ratio of unique survey visitors/unique site visitors)                                          | Requires counting unique visitors to the first page of the survey, divided by the number of unique site visitors (not page views!). It is not unusual to have view rates of less than 0.1 % if the survey is voluntary                                                                                                                                                                                                                                                                                                         | <b>Survey site contains first page of survey therefore N/A</b>     |
|                            | Participation rate (Ratio of unique visitors who agreed to participate/unique first survey page visitors) | Count the unique number of people who filled in the first survey page (or agreed to participate, for example by checking a checkbox), divided by visitors who visit the first page of the survey (or the informed consents page, if present). This can also be called "recruitment" rate.                                                                                                                                                                                                                                      | <b>Outlined in 'Results'</b>                                       |
|                            | Completion rate (Ratio of users who finished the survey/users who agreed to participate)                  | The number of people submitting the last questionnaire page, divided by the number of people who agreed to participate (or submitted the first survey page). This is only relevant if there is a separate "informed consent" page or if the survey goes over several pages. This is a measure for attrition. Note that "completion" can involve leaving questionnaire items blank. This is not a measure for how completely questionnaires were filled in. (If you need a measure for this, use the word "completeness rate".) | <b>Outlined in 'Results'</b>                                       |
| <b>Preventing multiple</b> | Cookies used                                                                                              | Indicate whether cookies were used to assign a unique user identifier to each                                                                                                                                                                                                                                                                                                                                                                                                                                                  | <b>Not used</b>                                                    |

|                                                |                                                            |                                                                                                                                                                                                                                                                                                                                                                                                                                                                                                                                                                                   |                                                                                            |
|------------------------------------------------|------------------------------------------------------------|-----------------------------------------------------------------------------------------------------------------------------------------------------------------------------------------------------------------------------------------------------------------------------------------------------------------------------------------------------------------------------------------------------------------------------------------------------------------------------------------------------------------------------------------------------------------------------------|--------------------------------------------------------------------------------------------|
| <p><b>entries from the same individual</b></p> |                                                            | <p>client computer. If so, mention the page on which the cookie was set and read, and how long the cookie was valid. Were duplicate entries avoided by preventing users access to the survey twice; or were duplicate database entries having the same user ID eliminated before analysis? In the latter case, which entries were kept for analysis (eg, the first entry or the most recent)?</p>                                                                                                                                                                                 |                                                                                            |
|                                                | <p>IP check</p>                                            | <p>Indicate whether the IP address of the client computer was used to identify potential duplicate entries from the same user. If so, mention the period of time for which no two entries from the same IP address were allowed (eg, 24 hours). Were duplicate entries avoided by preventing users with the same IP address access to the survey twice; or were duplicate database entries having the same IP address within a given period of time eliminated before analysis? If the latter, which entries were kept for analysis (eg, the first entry or the most recent)?</p> | <p><b>Not used due to survey being completed on multi-user/single log-in computers</b></p> |
|                                                | <p>Log file analysis</p>                                   | <p>Indicate whether other techniques to analyze the log file for identification of multiple entries were used. If so, please describe.</p>                                                                                                                                                                                                                                                                                                                                                                                                                                        | <p><b>Not done</b></p>                                                                     |
|                                                | <p>Registration</p>                                        | <p>In “closed” (non-open) surveys, users need to login first and it is easier to prevent duplicate entries from the same user. Describe how this was done. For example, was the survey never displayed a second time once the user had filled it in, or was the username stored together with the survey results and later eliminated? If the latter, which entries were kept for analysis (eg, the first entry or the most recent)?</p>                                                                                                                                          | <p><b>N/A</b></p>                                                                          |
| <p><b>Analysis</b></p>                         | <p>Handling of incomplete questionnaires</p>               | <p>Were only completed questionnaires analyzed? Were questionnaires which terminated early (where, for example, users did not go through all questionnaire pages) also analyzed?</p>                                                                                                                                                                                                                                                                                                                                                                                              | <p><b>Outlined in ‘Data Analysis’</b></p>                                                  |
|                                                | <p>Questionnaires submitted with an atypical timestamp</p> | <p>Some investigators may measure the time people needed to fill in a questionnaire and exclude questionnaires that were submitted too soon. Specify the timeframe that was used as a cut-off point, and describe how this point was determined</p>                                                                                                                                                                                                                                                                                                                               | <p><b>N/A</b></p>                                                                          |
|                                                | <p>Statistical correction</p>                              | <p>Indicate whether any methods such as weighting of items or propensity scores have been used to adjust for the non-</p>                                                                                                                                                                                                                                                                                                                                                                                                                                                         | <p><b>Outlined in ‘Data Analysis’</b></p>                                                  |



|  |  |                                                            |  |
|--|--|------------------------------------------------------------|--|
|  |  | representative sample; if so, please describe the methods. |  |
|--|--|------------------------------------------------------------|--|

849

850

851

852

853

854

855

856

857

858

## Figure Legend

859

### Figure 1

861 Box plots of Need for Recovery (NFR) score by participant demographic  
862 characteristics, excluding any participants who does not respond to the  
863 question (i.e. missing).

864 Plot a) age group in years; b) gender; c) clinical grade; d) any long-term  
865 health condition or disability.

866

867 ST1-ST2=Specialist Training year 1-2 (this included physicians training in  
868 Anaesthetics, Emergency Medicine, Acute Medicine and General Practice)

869 SASG=Staff grade, associate specialist and speciality grade

870 GP=General Practitioner working within the emergency department (ED)

871

### Figure 2

873 Box plot of Need for Recovery (NFR) score by participant's occupational  
874 characteristics, excluding any participants who does not respond to the  
875 question (i.e. missing).

876 Plot a) ability to obtain study leave when requested; b) ability to obtain annual  
877 leave when requested; c) proportion of time working out-of-hours; d) working  
878 in paediatrics emergency departments (ED) only.

879

1  
2  
3  
4  
5  
6  
7  
8  
9  
10  
11  
12  
13  
14  
15  
16  
17  
18  
19  
20  
21  
22  
23  
24  
25  
26  
27  
28  
29  
30  
31  
32  
33  
34  
35  
36  
37  
38  
39  
40  
41  
42  
43  
44  
45  
46  
47  
48  
49  
50  
51  
52  
53  
54  
55  
56  
57  
58  
59  
60



Review only

1  
2  
3  
4  
5  
6  
7  
8  
9  
10  
11  
12  
13  
14  
15  
16  
17  
18  
19  
20  
21  
22  
23  
24  
25  
26  
27  
28  
29  
30  
31  
32  
33  
34  
35  
36  
37  
38  
39  
40  
41  
42  
43  
44  
45  
46  
47  
48  
49  
50  
51  
52  
53  
54  
55  
56  
57  
58  
59  
60

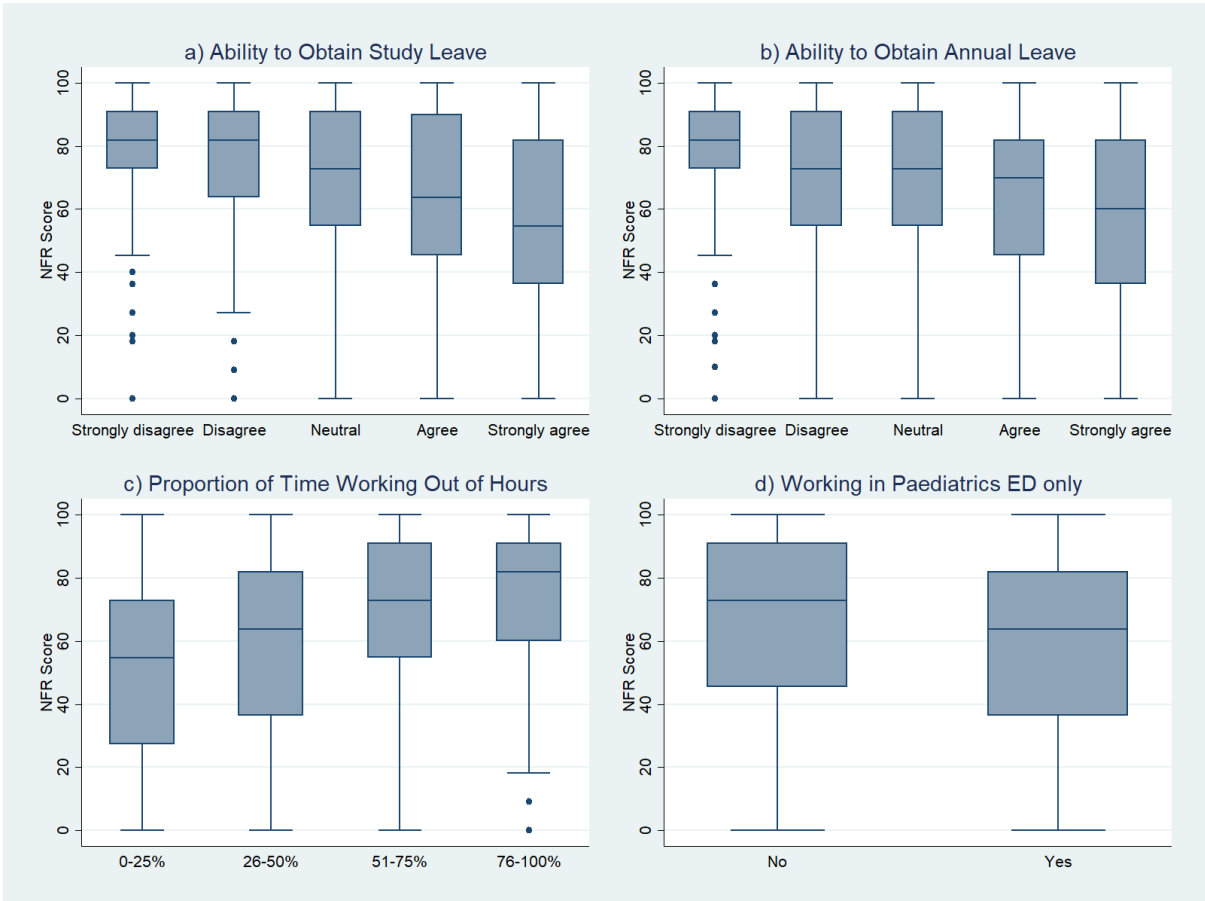

Review only

1  
2  
3  
4  
5  
6  
7  
8  
9  
10  
11  
12  
13  
14  
15  
16  
17  
18  
19  
20  
21  
22  
23  
24  
25  
26  
27  
28  
29  
30  
31  
32  
33  
34  
35  
36  
37  
38  
39  
40  
41  
42  
43  
44  
45  
46  
47  
48  
49  
50  
51  
52  
53  
54  
55  
56  
57  
58  
59  
60

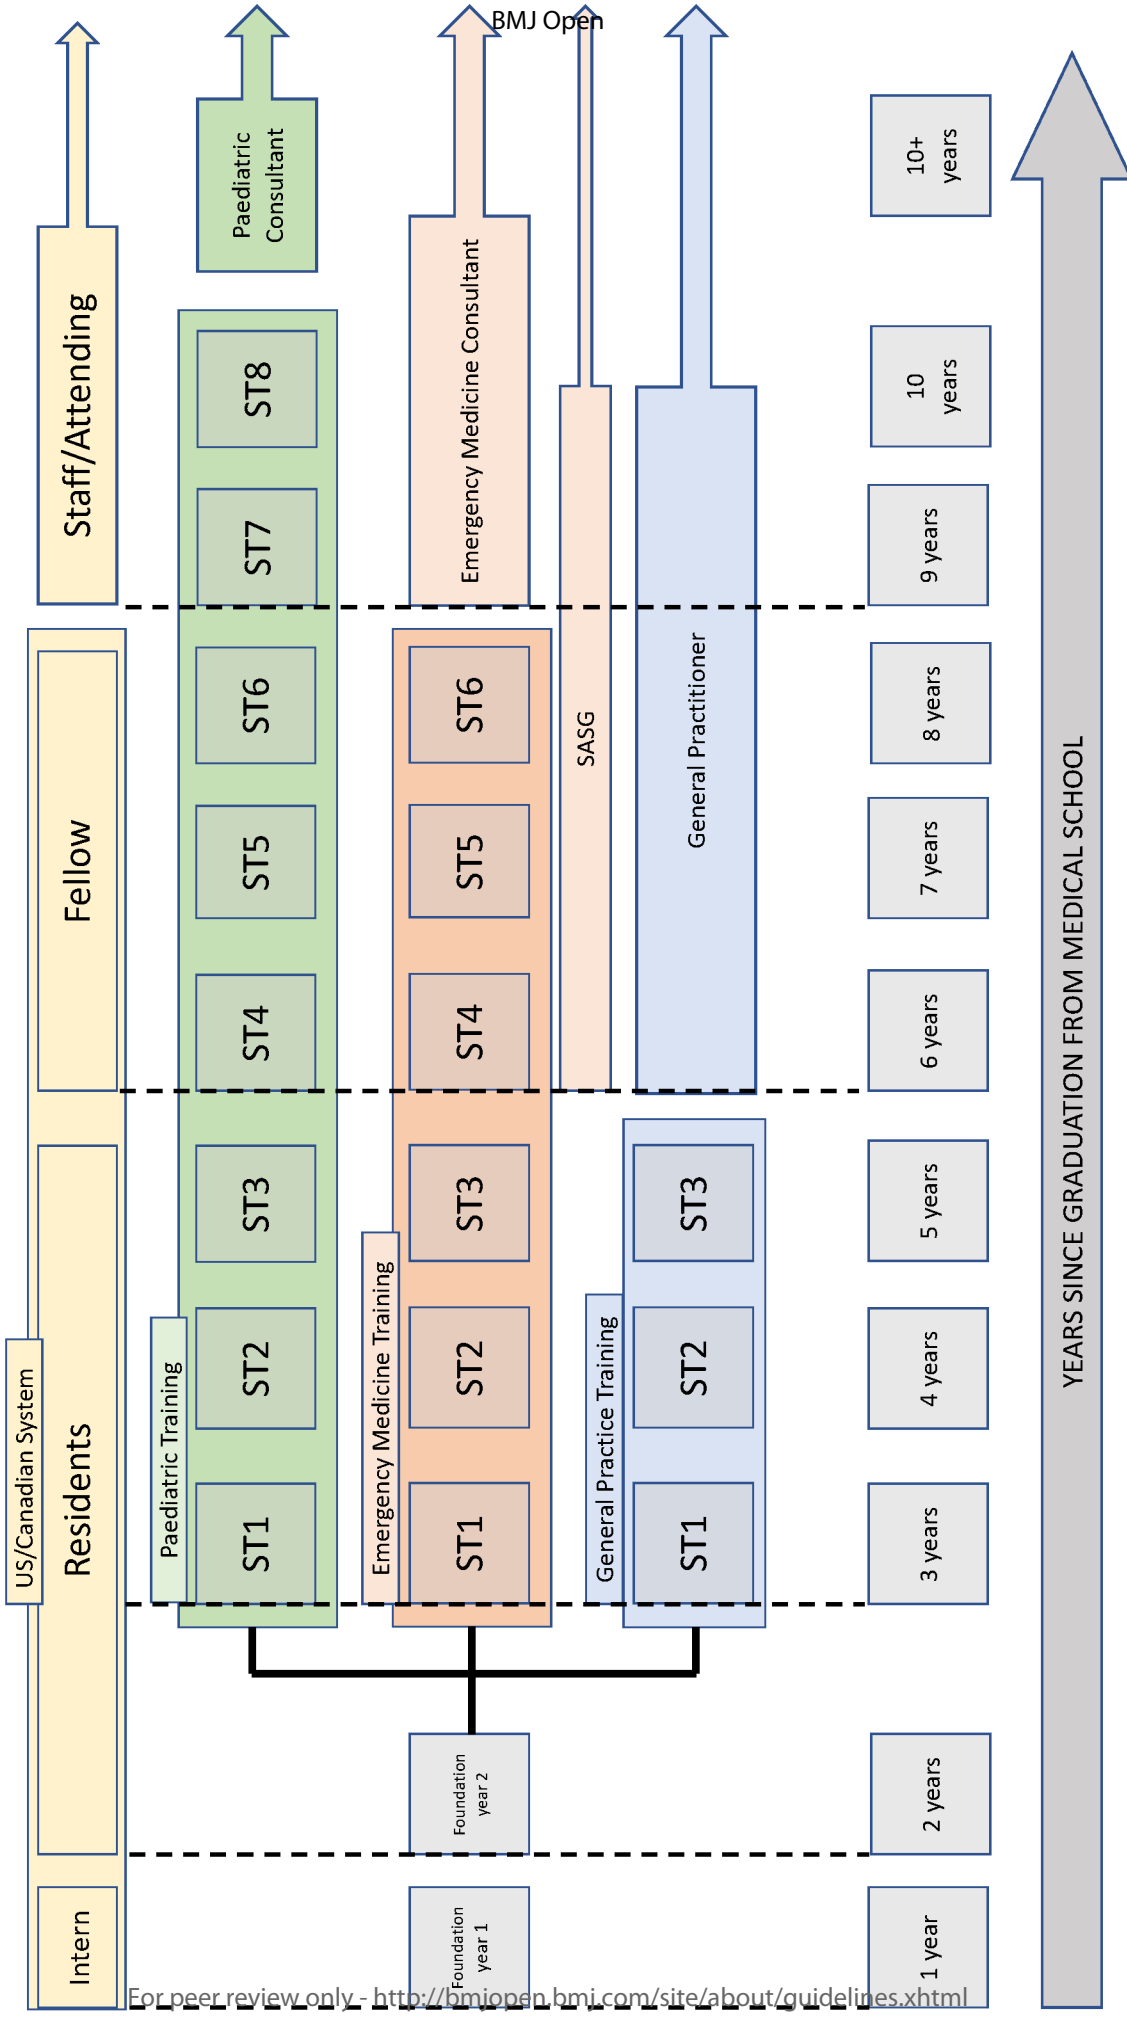

# Emergency Department Need For Recovery Survey

1  
2  
3  
4  
5  
6  
7  
8  
9  
10  
11  
12  
13  
14  
15  
16  
17  
18  
19  
20  
21  
22  
23  
24  
25  
26  
27  
28  
29  
30  
31  
32  
33  
34  
35  
36  
37  
38  
39  
40  
41  
42  
43  
44  
45  
46  
47  
48  
49  
50  
51  
52  
53  
54  
55  
56  
57  
58  
59  
60

---

Do you want to read the patient participation leaflet, GDPR and consent information now?

- Yes
- No

For peer review only

---

1 Participant Information Sheet

2  
3 Welcome to the 2019 TERN Need for Recovery Survey.

---

4  
5 This is an electronic participant information sheet.  
6 Please take a minute or two to read this information  
7 before proceeding with the survey.

8  
9 What is need for recovery?

10 Need for recovery is the time taken to physically and  
11 psychologically recover from work. Increased need  
12 for recovery is linked to fatigue and a range of  
13 physical and psychological health outcomes including  
14 burnout.

15 Why have I been asked to take part?

16 You are either:

- 17 • A doctor working in an emergency department which  
18 has been nominated to participate in this survey.

19 What is the purpose of the study?

20 This survey is being conducted as part of a national  
21 survey by the Trainee Emergency Research Network  
22 (TERN). The project is being led by Dr Laura Cottey  
23 (Chief Investigator) and Dr Blair Graham, with  
24 oversight from the TERN executive committee. We hope  
25 that the results from this survey will provide a  
26 baseline assessment of trainee need for recovery,  
27 and demonstrate risk factors that may indicate an  
28 increased need for recovery. It is hoped that this  
29 survey will provide insight into the phenomenon of  
30 need for recovery amongst Emergency Department  
31 doctors, show where differences exist, and how need  
32 for recovery may be reduced in the future.  
33 Ultimately it is hoped that this survey may lead to  
34 initiatives to improve the working lives of doctors  
35 in the emergency department.

36 What will happen if I take part?

37 You will asked to take part in this electronic  
38 questionnaire. You should allocate about 5 minutes  
39 to complete the questionnaire, although you can save  
40 and return to completing the questionnaire at a  
41 later time.

42  
43 Do I have to take part?

44 In order that these results can inform future  
45 initiatives to improve working lives of emergency  
46 doctors, we do require a robust response rate.  
47 However, you are under no obligation to take part  
48 and may withdraw at any point without the need to  
49 give a reason.

50 Should you have uncertainties of queries about this  
51 survey, please do not hesitate to contact the study  
52 team.

53  
54 What will happen to my data if I withdraw my  
55 involvement?

56 If you choose to withdraw your involvement in the  
57 study, any results that you have submitted will be  
58 kept for analysis. However, you will not be required  
59 to input further into the study.

60  
If you would like to be formally withdrawn from the  
study at any point, please contact the study team  
(TERN@rcem.ac.uk). You do not have to give a reason.

For peer review only - <http://bmjopen.bmj.com/site/about/guidelines.xhtml>

Are there any potential risks or benefits of taking

BMJ 2020;13:e003363

This survey will provide valuable insight into the wellbeing of emergency department doctors nationally. We appreciate issues such as wellbeing and burnout are sensitive. We have included some information about sources that you might wish to contact for support both as part of this introduction, and at the end of the survey.

Who is involved in this project?

The project is being led by Dr Laura Cottey (Chief Investigator) and Dr Blair Graham, with oversight from the TERN executive committee which is led by Dr Tom Roberts. The study is indirectly supported by the Royal College of Emergency Medicine, but TERN is independent from the college.

What if something goes wrong?

It is very unlikely that anything will go wrong. If you feel it does, please contact the study team directly.

How will you protect my data and confidentiality?

The University Hospitals Plymouth NHS Trust is the sponsor for this study. The sponsor will be using information in order to undertake the study and will be responsible for looking after your information and using it properly. The data collected will be kept for 10 years after the study has finished.

Your rights to access, change or move your information are limited, as we need to manage your information in specific ways in order for the research to be reliable and accurate. If you withdraw from the study, we will keep the information about you that we have already obtained. To safeguard your rights, we will use the minimum personally identifiable information possible.

This study is also compliant with the General Data Protection Regulations (GDPR). For more information about GDPR click here.

How may I contact the study team in the future?

You can contact the study team by emailing Dr Laura Cottey at [laura.cottey@nhs.net](mailto:laura.cottey@nhs.net)

What to do if you need support about wellbeing

The following organisations can help provide advice and support with regards to your wellbeing.

-Your occupational health department (contact details available via your employer)

-Your general practitioner

-BMA Counselling Service (24 Hours). Telephone 0330 123 1245. (Note that you do not have to be a member of the BMA to access this service)

-The Samaritans (24 Hours). Telephone 116 123.

You can also access further information and signposting online via the Doctors Support Network <https://www.dsn.org.uk/>

Feel free to leave any comments.

1  
2  
3  
4  
5  
6  
7  
8  
9  
10  
11  
12  
13  
14  
15  
16  
17  
18  
19  
20  
21  
22  
23  
24  
25  
26  
27  
28  
29  
30  
31  
32  
33  
34  
35  
36  
37  
38  
39  
40  
41  
42  
43  
44  
45  
46  
47  
48  
49  
50  
51  
52  
53  
54  
55  
56  
57  
58  
59  
60

---

Consent Question 1:  Yes  
I have read and understood the participant  No  
information

---

Consent Question 2:  Yes  
I understand the information about confidentiality  No  
and GDPR

For peer review only



**Demographic Characteristics**

What is your current job role?

- ST1  
 ST2  
 ST3  
 ST4  
 ST5  
 ST6  
 ST7  
 ST8  
 F1  
 F2  
 Clinical Fellow (F2-ST3 Level)  
 Clinical Fellow (>=ST4 Level)  
 Consultant  
 Associate Specialist  
 Staff Grade  
 CESR Doctor  
 GP Trainee  
 GP  
 Other (please specify)

What is your job role?

\_\_\_\_\_

Which country do you work in?

- Scotland  
 Northern Ireland  
 Wales  
 England  
 Republic of Ireland

Which hospital do you currently work in?

- Aberdeen  
 Victoria Hospital, Kirkcaldy  
 Forth Valley Royal Hospital  
 Monklands Hospital  
 Royal Hospital for Children, Glasgow  
 Royal Infirmary of Edinburgh  
 St John's, Livingston  
 NHS Greater Glasgow and Clyde - Queen Elizabeth  
 NHS Greater Glasgow and Clyde - Glasgow Royal Infirmary  
 Crosshouse, Ayrshire  
 Royal Alexandria, Paisley  
 Ayr  
 Royal Hospital for Sick Children, Edinburgh  
 Other

Which hospital do you currently work in?

- Craigavon Area Hospital, Northern Ireland  
 Royal Victoria Hospital, Belfast  
 Ulster Hospital, Belfast  
 Other

1 Which hospital do you currently work in?  
2

- 3  Cardiff, University Hospital of Wales  
4  Ysbyty Gwynedd, Bangor  
5  Morriston Hospital, Swansea  
6  Wrexham, North Wales  
7  Other  
8  
9  
10  
11  
12  
13  
14  
15  
16  
17  
18  
19  
20  
21  
22  
23  
24  
25  
26  
27  
28  
29  
30  
31  
32  
33  
34  
35  
36  
37  
38  
39  
40  
41  
42  
43  
44  
45  
46  
47  
48  
49  
50  
51  
52  
53  
54  
55  
56  
57  
58  
59  
60

For peer review only

1 Which hospital do you currently work in (the list is mostly alphabetically but if you cannot find your hospital please  
2 check the bottom)?  
3

- 4  Addenbrooke's Hospital  
5  Aintree  
6  Airedale General Hospital  
7  Basingstoke Emergency Department  
8  Bedford hospital emergency department  
9  Birmingham  
10  Bolton  
11  Bradford Royal Infirmary  
12  Brighton (Royal Sussex County Hospital)  
13  Bristol Childrens Hospital  
14  Bristol Royal Infirmary (Adults)  
15  Cambridge University Hospitals  
16  Chelsea & Westminster Hospital  
17  Croydon University Hospital  
18  Doncaster Royal Infirmary  
19  William Harvey ED  
20  East Surrey Hospital ED  
21  Epsom and St Helier NHS Trust  
22  Gloucestershire Hospitals NHS Foundation Trust  
23  Great Western Hospital Swindon  
24  Hampshire Hospitals NHS Trust (Basingstoke and Winchester)  
25  Harrogate Emergency Department  
26  Homerton Emergency Department  
27  Ipswich Hospital  
28  James Cook University Hospital Middlesbrough  
29  James Paget University Hospital  
30  Leeds teaching hospitals  
31  Leicester Royal Infirmary  
32  Leighton (Crewe)  
33  Lewisham university hospital  
34  Lister Hospital  
35  QEH, London  
36  Manchester Royal Infirmary  
37  Milton Keynes University  
38  Musgrove Park Hospital, Taunton  
39  Northern general hospital  
40  Northumbria Specialist Emergency Care Hospital  
41  Northwick Park Hospital  
42  Oxford University Hospital NHS Foundation Trust/  
43  Portsmouth - Queen Alexandra Hospital,  
44  Plymouth- Derriford  
45  Reading  
46  Royal Berkshire Hospital  
47  Royal Blackburn Hospital  
48  Royal Cornwall Hospital, Truro  
49  Royal Devon & Exeter Hospital  
50  Royal Liverpool University Hospital  
51  The Royal London Hospital (Paeds)  
52  The Royal London Hospital (Adults)  
53  Royal Manchester Children's Hospital  
54  Royal Oldham Hospital  
55  Royal Preston hospital  
56  Royal Shrewsbury Hospital  
57  Royal Stoke  
58  Royal Surrey County Hospital  
59  Royal United Hospital Bath  
60  Royal Victoria, Newcastle  
 Salford Royal Hospital, Manchester  
 Sheffield Childrens Hospital ED  
 Medway Foundation NHS Trust  
 Mid Cheshire Hospitals NHS Foundation Trust  
 University Hospital Southampton  
 St Helens and Knowsley  
 Southmead Hospital  
 Surrey and Sussex Healthcare NHS Trust  
 St George's Hospital Tooting

For peer review only

- 1  St Marys Hospital, London  
2  St Richards hospital  
3  St Thomas' Hospital  
4  Torbay  
5  Tunbridge Wells Hospital  
6  Southport District General Hospital  
7  University College Hospital, London  
8  University Hospital Coventry and Warwickshire  
9  Warrington  
10  University Hospitals of Derby and Burton NHS Foundation Trust  
11  Watford General hospital  
12  West Middlesex University Hospital  
13  West Suffolk Hospital  
14  Frimley Park Hospital  
15  Wexham Park Hospital, Frimley Health NHS  
16  Whiston Hospital  
17  Wythenshawe Hospital  
18  Yeovil District Hospital  
19  York District hospital  
20  York Hospital Emergency Departments  
21  Whiston Hospital  
22  William Harvey Hospital  
23  Worthing Hospital  
24  University hospital of Hull  
25  North Middlesex  
26  Sandwell and West Birmingham  
27  Stoke Mandeville  
28  Colchester  
29  Alder Hey Children's Hospital  
30  Queen's Hospital, Romford  
31  Birmingham Children's Hospital  
32  Sunderland Royal Hospital  
33  Countess of Chester NHS foundation trust  
34  University hospital of North Durham  
35  Evelina Children's Hospital  
36  King's College, London  
37  Barnstaple  
38  Nottingham University Hospital  
39  Royal Alexandra Children's Hospital  
40  Royal Wolverhampton  
41  Salisbury NHS Trust  
42  Western Sussex NHS Trust  
43  Other  
44  Alder Hey Childrens Hospital  
45  Birmingham Women's and Childrens Hospital  
46  Countess of Chester  
47  Evelina, Guys and St Thomas's  
48  Kings College Hospital  
49  Royal Alexandra Children's Hospital, Brighton and Sussex  
50  New Cross Hospital  
51  Salisbury  
52  Barking, Havering & Redbridge - Queen's  
53  Barking, Havering & Redbridge - King George  
54  South Tyneside and Sunderland NHS Trust  
55  County Durham and Darlington  
56  North Manchester General Hospital

1 Which hospital do you currently work in?  
2

- 3  University Hospital Galway
- 4  Mater Misericordiae University Hospital, Dublin,
- 5  Sligo University Hospital
- 6  Limerick regional Hospital
- 7  Other
- 8  Children's Health Ireland at Crumlin
- 9  Children's Health Ireland at Temple Street
- 10  Children's Health Ireland at Tallaght
- 11  Bon Secours Hospital
- 12  Cork University Hospital

13  
14 Please state the name of your hospital.  
15  
16  
17 \_\_\_\_\_  
18 \_\_\_\_\_

19 What type of patients do you see in your Emergency Department?  
20

- 21  Adults only
- 22  Paediatrics only
- 23  Mixture of Adults and Paediatrics

24  
25 How old are you?  
26

- 27  20-25
- 28  26-30
- 29  31-35
- 30  36-40
- 31  41-45
- 32  46-50
- 33  51-55
- 34  56-60
- 35  61- 65
- 36  66-70
- 37  >70

38  
39 What is your gender?  
40

- 41  Female
- 42  Male
- 43  Other
- 44  Prefer not to say

**Please fill out the following "Need for Recovery Score". Please base this on the LAST MONTH of work (excluding leave).**

|                                                                                                                           | yes                   | no                    |
|---------------------------------------------------------------------------------------------------------------------------|-----------------------|-----------------------|
| I find it difficult to relax at the end of the working day?                                                               | <input type="radio"/> | <input type="radio"/> |
| By the end of the working day I feel really worn-out                                                                      | <input type="radio"/> | <input type="radio"/> |
| Because of my job, at the end of the working day I feel rather exhausted                                                  | <input type="radio"/> | <input type="radio"/> |
| After my breaks, I feel fresh to continue my work                                                                         | <input type="radio"/> | <input type="radio"/> |
| Generally speaking, I only start to feel relaxed on my second non-working day off                                         | <input type="radio"/> | <input type="radio"/> |
| I find it difficult to concentrate in my free time after work                                                             | <input type="radio"/> | <input type="radio"/> |
| I find it hard to show interest in other people when I have just come home from work                                      | <input type="radio"/> | <input type="radio"/> |
| In general, it takes me over an hour to feel fully recuperated after work                                                 | <input type="radio"/> | <input type="radio"/> |
| When I get home, I need to be left in peace for a while                                                                   | <input type="radio"/> | <input type="radio"/> |
| Often, after a day's work I feel so tired that I cannot get involved in other activities                                  | <input type="radio"/> | <input type="radio"/> |
| A feeling of tiredness prevents me from doing my work as well as I normally would during the last part of the working day | <input type="radio"/> | <input type="radio"/> |

How long have you worked in your current Emergency Department?

- 1 month or less
- 1-2 months
- 2-3 months
- 3-4 months
- 4-5 months
- 5-6 months
- 6 months - 1 year
- 1-2 years
- 2-3 years
- 3-5 years
- 5 -10 years
- 10 -15 years
- 15-20 years
- > 20 years

1 How long have you worked in Emergency Medicine in total in your career?  
2

- 3  1 year or less  
4  1 year or more  
5

6 How many months have you worked in Emergency Medicine in total?  
7

8 \_\_\_\_\_  
9  
10

11 How many years have you worked in Emergency Medicine in total?  
12

13 \_\_\_\_\_  
14  
15

16 What is your most frequent method of transport for your commute to work?  
17

- 18  Car  
19  Motorbike  
20  Bus  
21  Train  
22  Underground  
23  Walk  
24  Run  
25  Cycle  
26  I live on-site  
27  Other  
28

29 You have selected other, how do you commute?  
30

31 \_\_\_\_\_  
32  
33  
34  
35  
36  
37  
38  
39  
40  
41  
42  
43  
44  
45  
46  
47  
48  
49  
50  
51  
52  
53  
54  
55  
56  
57  
58  
59  
60

**How long does your commute take in minutes (one way)?**

|                   | 1-10<br>mins          | 11-20<br>mins         | 21-30<br>mins         | 31-40<br>mins         | 41-50<br>mins         | 51-60<br>mins         | 61-70<br>mins         | 71-80<br>mins         | 81-90<br>mins         | >90<br>mins           |
|-------------------|-----------------------|-----------------------|-----------------------|-----------------------|-----------------------|-----------------------|-----------------------|-----------------------|-----------------------|-----------------------|
| On an average day | <input type="radio"/> |
| On a good day     | <input type="radio"/> |
| On a bad day      | <input type="radio"/> |

What type of contract do you work?

- Full time  
 90%, less than full time  
 80%, less than full time  
 70%, less than full time  
 60%, less than full time  
 50%, less than full time  
 less than 50%, less than full time

Do you have dedicated contracted time away from Adult Emergency Medicine (e.g. subspecialty or GP) or work in Paediatric Emergency Medicine?

- Yes  
 No

Please select all that are applicable to your current contracted time.

- ICM  
 PEM  
 PHEM  
 Academic  
 Teaching  
 Leadership/Management  
 Paediatrics  
 GP  
 Other

What is your "other" contracted time?

\_\_\_\_\_

What percentage of your contract is spent in ICM rather than EM?

- 10%  
 20%  
 25%  
 30%  
 40%  
 50%  
 60%  
 70%  
 75%  
 80%  
 90%  
 100%



---

1 What percentage of your contract is spent in PEM rather than Adult EM?  
2

- 3  10%
- 4  20%
- 5  25%
- 6  30%
- 7  40%
- 8  50%
- 9  60%
- 10  70%
- 11  75%
- 12  80%
- 13  90%
- 14  100%

---

16 What percentage of your contract is spent in PHEM rather than Adult EM?  
17

- 18  10%
- 19  20%
- 20  25%
- 21  30%
- 22  40%
- 23  50%
- 24  60%
- 25  70%
- 26  75%
- 27  80%
- 28  90%
- 29  100%

---

31 What percentage of your contract is spent Academic rather than Adult EM?  
32

- 33  10%
- 34  20%
- 35  25%
- 36  30%
- 37  40%
- 38  50%
- 39  60%
- 40  70%
- 41  75%
- 42  80%
- 43  90%
- 44  100%

---

45 What percentage of your contract is spent Teaching rather than Adult EM?  
46

- 47  10%
- 48  20%
- 49  25%
- 50  30%
- 51  40%
- 52  50%
- 53  60%
- 54  70%
- 55  75%
- 56  80%
- 57  90%
- 58  100%
- 59
- 60

---

1 What percentage of your contract is spent management/leadership rather than Adult EM?  
2

- 3  10%  
4  20%  
5  25%  
6  30%  
7  40%  
8  50%  
9  60%  
10  70%  
11  75%  
12  80%  
13  90%  
14  100%

---

16 What percentage of your contract is spent doing paediatrics rather than EM?  
17

- 18  10%  
19  20%  
20  25%  
21  30%  
22  40%  
23  50%  
24  60%  
25  70%  
26  75%  
27  80%  
28  90%  
29  100%

---

31 What percentage of your contract is spent doing GP rather than Adult EM?  
32

- 33  10%  
34  20%  
35  25%  
36  30%  
37  40%  
38  50%  
39  60%  
40  70%  
41  75%  
42  80%  
43  90%  
44  100%

---

45 What percentage of your contract is spent doing "other" activities rather than Adult EM?  
46

- 47  10%  
48  20%  
49  25%  
50  30%  
51  40%  
52  50%  
53  60%  
54  70%  
55  75%  
56  80%  
57  90%  
58  100%  
59  
60

---

1 What is the maximum number of TOTAL clinical shifts you work in a week?  
2

- 3  1 shift
- 4  2 shifts
- 5  3 shifts
- 6  4 shifts
- 7  5 shifts
- 8  6 shifts
- 9  7 shifts

---

11 What is the maximum number of CONSECUTIVE clinical shifts you would be scheduled to work?  
12

- 13  1 shift
- 14  2 shifts
- 15  3 shifts
- 16  4 shifts
- 17  5 shifts
- 18  6 shifts
- 19  7 shifts
- 20  > 7 shifts

---

22 What is the maximum number of consecutive NIGHT shifts you would be scheduled to work in a row?  
23

- 24  0 shifts
- 25  1 shift
- 26  2 shifts
- 27  3 shifts
- 28  4 shifts
- 29  5 shifts
- 30  6 shifts
- 31  7 shifts

---

33 What is the maximum number of consecutive DAY shifts you would be scheduled to work in a row?  
34

- 35  0 shifts
- 36  1 shift
- 37  2 shifts
- 38  3 shifts
- 39  4 shifts
- 40  5 shifts
- 41  6 shifts
- 42  7 shifts

---

44 What is the maximum number of consecutive TWILIGHT shifts you would be scheduled to work in a row?  
45

- 46  0 shifts
- 47  1 shift
- 48  2 shifts
- 49  3 shifts
- 50  4 shifts
- 51  5 shifts
- 52  6 shifts
- 53  7 shifts

---

1 What is your scheduled weekend work frequency?  
2

- 3  1 in 2  
4  1 in 3  
5  1 in 4  
6  1 in 5  
7  1 in 6  
8  Less frequent than 1 in 6  
9  I don't work weekends
- 

11 Over the past month how many contracted non-clinical shifts have you had? E.g. SPA, teaching, clinical governance.  
12

- 13  0 shifts  
14  Between 0-1 shifts  
15  1 shift  
16  2 shifts  
17  3 shifts  
18  4 shifts  
19  5 shifts  
20  6 shifts  
21  7 shifts  
22  8 shifts  
23  9 shifts  
24  10 shifts  
25  11-15 shifts  
26  >15 shifts
- 

28 In the past month how many locum shifts have you  
29 worked? \_\_\_\_\_

---

31 Over the past month, roughly how often have you left more than 15 minutes late following a clinical shift?  
32

- 33  Rarely  
34  A few times a month  
35  Once a week  
36  A few times a week  
37  Everyday
- 

39 Over the past month, how often have you taken your full entitlement of breaks during a clinical shift?  
40

- 41  Rarely  
42  A few times a month  
43  Once a week  
44  A few times a week  
45  Everyday
- 

47 What proportion would you say you spend working 'out of hours' (evenings, nights or weekends)?  
48

- 49  < 25%  
50  26-50%  
51  51-75%  
52  76-100%
- 

54 What proportion of your locum shifts would you say you spend working 'out of hours' (evenings, nights or weekends)?  
55

- 56  < 25%  
57  26-50%  
58  51-75%  
59  76-100%
- 
- 60

---

1 I have been able to request and take the annual leave I wanted?  
2

- 3  Strongly disagree  
4  Disagree  
5  Neutral  
6  Agree  
7  Strongly agree  
8

---

9 I have been able to request and take the study leave I wanted?  
10

- 11  Strongly disagree  
12  Disagree  
13  Neutral  
14  Agree  
15  Strongly agree  
16

---

17 Over the past month, roughly how often have you found yourself feeling overwhelmed with work during a clinical  
18 shift?  
19

- 20  Rarely  
21  A few times a month  
22  Once a week  
23  A few times a week  
24  Everyday  
25

---

26 Do you consider yourself to have any long-term health conditions or disability?  
27

- 28  Yes  
29  No  
30  Prefer not to say  
31

---

32 Do you have significant caring responsibilities outside of work?  
33 (e.g. parent or main carer for a relative)  
34

- 35  Yes  
36  No  
37  Prefer not to say  
38

---

39 I feel at high risk of burnout from my job in the near future?  
40

- 41  Yes  
42  No  
43  Prefer not to say  
44

---

45 I feel I am currently suffering burnout from work?  
46

- 47  Yes  
48  No  
49  Prefer not to say  
50  
51  
52  
53  
54  
55  
56  
57  
58  
59  
60

# TIRED Site Survey

## Department Demographics

Name of emergency department and NHS trust?

\_\_\_\_\_

Number of attendances per year?

\_\_\_\_\_

Any specialist designation?

- Trauma unit  
 Adult major trauma centre  
 Stroke centre  
 PCI centre  
 Paediatric major trauma centre

Number of EM Consultants?

\_\_\_\_\_

Number of EM Middle Grades (ST4 and above)?

\_\_\_\_\_

Number of EM Middle grade career clinicians equivalent to > ST4 (eg associate specialist, specialty doctors, CESR or other non-training doctors)?

\_\_\_\_\_

Number of EM trainees ST3?

\_\_\_\_\_

Number of ACCS trainees ST1-2?

\_\_\_\_\_

Number of GP trainees ST1-3?

\_\_\_\_\_

Number of ED GPs?

\_\_\_\_\_

Number of Clinical Fellows (Fy1-ST3)?

\_\_\_\_\_

Number of Clinical Fellows (>=ST4)?

\_\_\_\_\_

Number of FY2s?

\_\_\_\_\_

Number of FY1s?

\_\_\_\_\_

Total number of ED Doctors calculated from the answers above:

\_\_\_\_\_

1 Out of the total number of doctors above, how many  
2 will be ineligible for the study due to absence  
3 during the study period? (eg maternity, sick or  
4 annual leave) \_\_\_\_\_  
5

6 What percentage of eligible EM doctors do you  
7 estimate you will enrol in the survey? (ie if you  
8 have 50 doctors and think you will enrol 25 at your  
9 site, that would be 50%). \_\_\_\_\_

(We are aiming for a response rate of 80% of  
eligible doctors as a minimum at each site but  
understand this not might be achievable.  
Therefore, this is an opportunity to document how  
many you think will be achievable at your site.)

14 Number of advanced nurse practitioners? \_\_\_\_\_  
15  
16

18 Number of advanced clinical practitioners? \_\_\_\_\_  
19  
20

21 Number of adult qualified EM nurses? \_\_\_\_\_  
22  
23

24 Number of paediatric qualified EM nurses? \_\_\_\_\_  
25  
26

28 Number of health care assistants (or equivalent)? \_\_\_\_\_  
29  
30

31 Number of EM physician associates? \_\_\_\_\_  
32  
33

34 Does your Consultant rota use self-rostering?  Yes  
35  No  
36

38 Does your Registrar rota use self-rostering?  Yes  
39  No  
40

41 Does your SHO rota use self-rostering?  Yes  
42  No  
43  
44  
45  
46  
47  
48  
49  
50  
51  
52  
53  
54  
55  
56  
57  
58  
59  
60

**What are the current vacancy rates for permanent staff in the following roles?**

|                                          | 0-10%                 | 11-20%                | 21-30%                | 31-40%                | 41-50%                | 51-60%                | 61-70%                | 71-80%                | 81-90%                | 91-100%               |
|------------------------------------------|-----------------------|-----------------------|-----------------------|-----------------------|-----------------------|-----------------------|-----------------------|-----------------------|-----------------------|-----------------------|
| EM consultants                           | <input type="radio"/> |
| EM medical staff (excluding Consultants) | <input type="radio"/> |
| EM nursing staff                         | <input type="radio"/> |
| Non-medical staff                        | <input type="radio"/> |
| All staff                                | <input type="radio"/> |

What percentage of patients were seen within 4 hours in April 2019?

\_\_\_\_\_

What percentage of patients were seen within 4 hours in March 2019?

\_\_\_\_\_

What percentage of patients were seen within 4 hours in February 2019?

\_\_\_\_\_

What percentage of patients were seen within 4 hours in January 2019?

\_\_\_\_\_

What percentage of patients were seen within 4 hours in December 2018?

\_\_\_\_\_

What percentage of patients were seen within 4 hours in November 2018?

\_\_\_\_\_



1  
2  
3  
4  
5  
6  
7  
8  
9  
10  
11  
12  
13  
14  
15  
16  
17  
18  
19  
20  
21  
22  
23  
24  
25  
26  
27  
28  
29  
30  
31  
32  
33  
34  
35  
36  
37  
38  
39  
40  
41  
42  
43  
44  
45  
46  
47  
48  
49  
50  
51  
52  
53  
54  
55  
56  
57  
58  
59  
60

**What are the current sickness rates for the following staff groups?**

|                                          | 0-1%                  | 1-2%                  | 2-3%                  | 3-4%                  | 4-5%                  | 5-6%                  | 6-7%                  | 7-8%                  | 8-9%                  | 9-10%                 | >10%                  |
|------------------------------------------|-----------------------|-----------------------|-----------------------|-----------------------|-----------------------|-----------------------|-----------------------|-----------------------|-----------------------|-----------------------|-----------------------|
| EM Consultants                           | <input type="radio"/> |
| EM Medical Staff (excluding Consultants) | <input type="radio"/> |
| EM Nursing staff                         | <input type="radio"/> |
| Non-Medical Staff                        | <input type="radio"/> |
| All Staff                                | <input type="radio"/> |

For peer review only

**What is the Minimum Shift Length for the below groups of staff?**

|                                | 6 hours               | 7 hours               | 8 hours               | 9 hours               | 10 hours              | 11 hours              | 12 hours              | 13 hours              | N/A                   |
|--------------------------------|-----------------------|-----------------------|-----------------------|-----------------------|-----------------------|-----------------------|-----------------------|-----------------------|-----------------------|
| EM Consultants                 | <input type="radio"/> |
| EM Trainees, ST4 and above     | <input type="radio"/> |
| EM Non-training, ST4 and above | <input type="radio"/> |
| EM Trainees ST3                | <input type="radio"/> |
| ACCS Trainees ST1-2            | <input type="radio"/> |
| GP Trainees ST1-3              | <input type="radio"/> |
| Clinical Fellows (FY1- ST3)    | <input type="radio"/> |
| Clinical Fellows (>= ST4)      | <input type="radio"/> |
| Fy2 Doctors                    | <input type="radio"/> |
| Fy1 Doctors                    | <input type="radio"/> |

For peer review only

**What is the maximum shift length for the following groups of staff**

|                                | 6 hours               | 7 hours               | 8 hours               | 9 hours               | 10 hours              | 11 hours              | 12 hours              | 13 hours              | >13 hours             | N/A                   |
|--------------------------------|-----------------------|-----------------------|-----------------------|-----------------------|-----------------------|-----------------------|-----------------------|-----------------------|-----------------------|-----------------------|
| EM Consultants                 | <input type="radio"/> |
| EM Trainees, ST4 and above     | <input type="radio"/> |
| EM Non-trainees, ST4 and above | <input type="radio"/> |
| EM Trainees, ST3               | <input type="radio"/> |
| ACCS Trainees ST1-2            | <input type="radio"/> |
| GP Trainees, ST1-3             | <input type="radio"/> |
| Clinical Fellows (FY1 - ST3)   | <input type="radio"/> |
| Clinical Fellows (=>ST4)       | <input type="radio"/> |
| Fy2 Doctors                    | <input type="radio"/> |
| Fy1 Doctors                    | <input type="radio"/> |

For peer review only

1  
2  
3  
4  
5  
6  
7  
8  
9  
10  
11  
12  
13  
14  
15  
16  
17  
18  
19  
20  
21  
22  
23  
24  
25  
26  
27  
28  
29  
30  
31  
32  
33  
34  
35  
36  
37  
38  
39  
40  
41  
42  
43  
44  
45  
46  
47  
48  
49  
50  
51  
52  
53  
54  
55  
56  
57  
58  
59  
60

**How many hours are each of the shifts on your SHO rota?**  
**(Select multiple if this changes depending on the shift)**

|                          | < 8 hours                | 8 hours                  | 9 hours                  | 10 hours                 | 11 hours                 | 12 hours                 | >12 hour                 |
|--------------------------|--------------------------|--------------------------|--------------------------|--------------------------|--------------------------|--------------------------|--------------------------|
| Day shift (week)         | <input type="checkbox"/> |
| Night shift (week)       | <input type="checkbox"/> |
| Twilight shift (week)    | <input type="checkbox"/> |
| Day shift (weekend)      | <input type="checkbox"/> |
| Night shift (weekend)    | <input type="checkbox"/> |
| Twilight shift (weekend) | <input type="checkbox"/> |

For peer review only

**How many hours are each of the shifts on your registrar rota?**  
**(Select multiple if this changes depending on the shift)**

|                          | < 8 hours                | 8 hours                  | 9 hours                  | 10 hours                 | 11 hours                 | 12 hours                 | >12 hour                 |
|--------------------------|--------------------------|--------------------------|--------------------------|--------------------------|--------------------------|--------------------------|--------------------------|
| Day shift (week)         | <input type="checkbox"/> |
| Night shift (week)       | <input type="checkbox"/> |
| Twilight shift (week)    | <input type="checkbox"/> |
| Day shift (weekend)      | <input type="checkbox"/> |
| Night shift (weekend)    | <input type="checkbox"/> |
| Twilight shift (weekend) | <input type="checkbox"/> |

For peer review only

**How many hours are each of the shifts on your Consultant rota?**

|                          | < 8 hours             | 8 hours               | 9 hours               | 10 hours              | 11 hours              | 12 hours              | >12 hour              |
|--------------------------|-----------------------|-----------------------|-----------------------|-----------------------|-----------------------|-----------------------|-----------------------|
| Day shift (week)         | <input type="radio"/> |
| Night shift (week)       | <input type="radio"/> |
| Twilight shift (week)    | <input type="radio"/> |
| Day shift (weekend)      | <input type="radio"/> |
| Night shift (weekend)    | <input type="radio"/> |
| Twilight shift (weekend) | <input type="radio"/> |

Is there readily available rest facilities available for post night shifts?  Yes  
 No

Do people know how to access them?  Yes  
 No

Is there a break room available?  Yes  
 No

**Online Supplementary Material 4**  
**Table of Additional Participant Characteristics**

| Characteristic                                                               | N (%)       | NFR Score                    |               |
|------------------------------------------------------------------------------|-------------|------------------------------|---------------|
|                                                                              |             | Median (95% CI) <sup>1</sup> | [LQ - UQ]     |
| Maximum number of consecutive day shifts you would be scheduled to work      |             |                              |               |
| 0                                                                            | 30 (0.7)    | 63.6 (50.1 to 77.2)          | [36.4 - 90.9] |
| 1                                                                            | 42 (1.0)    | 59.1 (40.9 to 77.3)          | [27.3 - 90.9] |
| 2                                                                            | 217 (5.3)   | 63.6 (55.1 to 72.2)          | [36.4 - 81.8] |
| 3                                                                            | 522 (12.7)  | 63.6 (60.9 to 66.4)          | [36.4 - 81.8] |
| 4                                                                            | 788 (19.2)  | 63.6 (63.6 to 63.6)          | [45.5 - 81.8] |
| 5                                                                            | 1108 (27)   | 72.7 (70.0 to 75.5)          | [45.5 - 81.8] |
| 6                                                                            | 309 (7.5)   | 72.7 (66.9 to 78.6)          | [54.5 - 90.9] |
| 7                                                                            | 1094 (26.6) | 72.7 (72.7 to 72.7)          | [45.5 - 90.9] |
| Missing                                                                      | 137 (3.3)   | 72.7 (65.7 to 79.7)          | [50.0 - 90.9] |
| Maximum number of consecutive Twilight shifts you would be scheduled to work |             |                              |               |
| 0                                                                            | 339 (8.2)   | 54.5 (48.3 to 60.8)          | [36.4 - 81.8] |
| 1                                                                            | 341 (8.3)   | 60.0 (51.2 to 68.8)          | [36.4 - 81.8] |
| 2                                                                            | 496 (12.1)  | 54.5 (49.9 to 59.2)          | [36.4 - 81.8] |
| 3                                                                            | 796 (19.4)  | 63.6 (55.8 to 71.5)          | [45.5 - 81.8] |
| 4                                                                            | 1100 (26.7) | 72.7 (69.9 to 75.5)          | [45.5 - 90.9] |
| 5                                                                            | 600 (14.6)  | 72.7 (72.1 to 73.4)          | [54.5 - 90.9] |
| 6                                                                            | 107 (2.6)   | 72.7 (67.6 to 77.8)          | [54.5 - 90.9] |
| 7                                                                            | 334 (8.1)   | 81.8 (74.4 to 89.3)          | [54.5 - 90.9] |
| Missing                                                                      | 134 (3.3)   | 72.7 (67.3 to 78.1)          | [54.5 - 90.9] |
| Maximum number of consecutive night shifts you would be scheduled to work    |             |                              |               |
| 0                                                                            | 1057 (25.6) | 54.5 (52.0 to 57.1)          | [27.3 - 80.0] |
| 1                                                                            | 123 (3.0)   | 63.6 (53.2 to 74.0)          | [36.4 - 90.9] |
| 2                                                                            | 153 (3.7)   | 54.5 (44.7 to 64.4)          | [45.5 - 81.8] |
| 3                                                                            | 467 (11.3)  | 72.7 (65.6 to 79.9)          | [45.5 - 90.9] |
| 4                                                                            | 2188 (53.1) | 72.7 (72.7 to 72.7)          | [54.5 - 90.9] |
| 5                                                                            | 64 (1.6)    | 72.7 (64.4 to 81.1)          | [54.5 - 90.9] |
| 6                                                                            | 6 (0.1)     | 54.5 (NA)                    | [45.5 - 81.8] |
| 7                                                                            | 63 (1.5)    | 72.7 (64.4 to 81.1)          | [54.5 - 90.9] |
| Missing                                                                      | 126 (3.1)   | 72.7 (67.4 to 78.0)          | [54.5 - 90.9] |
| Maximum number of clinical shifts you work in a typical week?                |             |                              |               |
| 1                                                                            | 27 (0.7)    | 63.6 (45.2 to 82.0)          | [45.5 - 90.9] |
| 2                                                                            | 63 (1.5)    | 63.6 (49.2 to 78.1)          | [36.4 - 81.8] |

|                                                                         |             |                     |               |
|-------------------------------------------------------------------------|-------------|---------------------|---------------|
| 3                                                                       | 240 (5.9)   | 63.6 (58.1 to 69.2) | [36.4 - 81.8] |
| 4                                                                       | 553 (13.5)  | 63.6 (54.9 to 72.3) | [36.4 - 81.8] |
| 5                                                                       | 1074 (26.2) | 63.6 (62.1 to 65.2) | [45.5 - 81.8] |
| 6                                                                       | 858 (20.9)  | 72.7 (72.0 to 73.4) | [45.5 - 90.9] |
| 7                                                                       | 1285 (31.3) | 72.7 (72.7 to 72.7) | [45.5 - 90.9] |
| Missing                                                                 | 147 (3.6)   | 72.7 (67.1 to 78.3) | [45.5 - 90.9] |
| <b>Non-clinical shifts past month</b>                                   |             |                     |               |
| 0                                                                       | 1164 (28.3) | 72.7 (72.7 to 72.7) | [54.5 - 90.9] |
| <1                                                                      | 394 (9.6)   | 72.7 (72.1 to 73.4) | [54.5 - 90.9] |
| 1                                                                       | 525 (12.8)  | 72.7 (72.7 to 72.7) | [50.0 - 90.9] |
| 2                                                                       | 527 (12.8)  | 63.6 (57.3 to 70.0) | [45.5 - 81.8] |
| 3                                                                       | 242 (5.9)   | 63.6 (55.1 to 72.2) | [40.0 - 81.8] |
| 4                                                                       | 525 (12.8)  | 60.0 (51.5 to 68.5) | [36.4 - 81.8] |
| 5                                                                       | 115 (2.8)   | 54.5 (47.3 to 61.8) | [36.4 - 72.7] |
| 6                                                                       | 124 (3.0)   | 54.5 (45.6 to 63.5) | [31.7 - 80.9] |
| 7                                                                       | 39 (0.9)    | 63.6 (43.5 to 83.8) | [36.4 - 81.8] |
| 8                                                                       | 157 (3.8)   | 54.5 (45.2 to 63.9) | [36.4 - 81.8] |
| 9                                                                       | 19 (0.5)    | 60.0 (34.6 to 85.4) | [27.3 - 72.7] |
| 10                                                                      | 102 (2.5)   | 54.5 (45.2 to 63.9) | [36.4 - 80.0] |
| 11-15                                                                   | 86 (2.1)    | 54.5 (44.7 to 64.4) | [27.3 - 72.7] |
| >15                                                                     | 91 (2.2)    | 63.6 (47.6 to 79.7) | [27.3 - 81.8] |
| Missing                                                                 | 137 (3.3)   | 72.7 (66.6 to 78.9) | [54.5 - 90.9] |
| <b>Average commute in minutes</b>                                       |             |                     |               |
| 1-10                                                                    | 396 (9.6)   | 72.7 (64.2 to 81.3) | [45.5 - 81.8] |
| 11-20                                                                   | 814 (19.8)  | 72.7 (64.6 to 80.9) | [45.5 - 90.0] |
| 21-30                                                                   | 967 (23.5)  | 72.7 (64.6 to 80.8) | [45.5 - 90.9] |
| 31-40                                                                   | 703 (17.1)  | 63.6 (63.6 to 63.6) | [36.4 - 81.8] |
| 41-50                                                                   | 546 (13.3)  | 72.7 (64.5 to 81.0) | [45.5 - 90.9] |
| 51-60                                                                   | 365 (8.9)   | 72.7 (67.6 to 77.8) | [45.5 - 90.0] |
| >60                                                                     | 325 (7.9)   | 72.7 (66.9 to 78.5) | [45.5 - 90.9] |
| Missing                                                                 | 131 (3.2)   | 72.7 (68.4 to 77.1) | [54.5 - 90.9] |
| <b>Do you have a dedicated time away from adult emergency medicine?</b> |             |                     |               |
| No                                                                      | 3091 (75.2) | 72.7 (67.2 to 78.3) | [45.5 - 90.9] |
| Yes                                                                     | 1020 (24.8) | 63.6 (62.2 to 65.1) | [36.4 - 81.8] |
| Missing                                                                 | 136 (3.3)   | 72.7 (67.7 to 77.8) | [45.5 - 90.9] |

Frequency and percentage, median NFR score with 95% bootstrapped confidence intervals and the inter-quartile range of participants within each category.

<sup>1</sup> Bootstrapped 95% confidence intervals based on 1000 replications on a minimum of 8 observations.



**Online Supplementary Material 5**

**Summary of median quantile regression model fitted to the Need for Recovery (NFR) score with fixed effects for site, including the adjusted coefficient estimate (Adj. Coef. Est.) with corresponding 95% confidence interval (CI) and p-value.**

|                                                                                       | <b>Adj. Coeff. Est. (95% CI)</b> | <b>P-value<sup>1</sup></b> |
|---------------------------------------------------------------------------------------|----------------------------------|----------------------------|
| Constant<br>(baseline NFR score)                                                      | 59.51 (55.53 to 63.49)           | < 0.001                    |
| <b>Gender (baseline = Male)</b>                                                       |                                  |                            |
| • Female                                                                              | 3.38 (1.80 to 4.95)              | < 0.001                    |
| • Other/Prefer not to say                                                             | -0.10 (-7.84 to 7.64)            | 0.979                      |
| <b>Any long-term health conditions or disabilities (baseline = No)</b>                |                                  |                            |
| • Yes                                                                                 | 8.33 (5.73 to 10.93)             | < 0.001                    |
| • Prefer not to say                                                                   | 6.10 (1.78 to 10.43)             | 0.006                      |
| <b>ED paediatrics only? (baseline = No)</b>                                           |                                  |                            |
| • Yes                                                                                 | -8.47 (-12.97 to -3.98)          | < 0.001                    |
| <b>Clinical grade (baseline = Foundation)</b>                                         |                                  |                            |
| • ST1-ST2                                                                             | -0.20 (-2.55 to 2.16)            | 0.869                      |
| • > ST2                                                                               | 1.04 (-1.49 to 3.57)             | 0.421                      |
| • SASG                                                                                | -1.20 (-4.32 to 1.92)            | 0.450                      |
| • GP                                                                                  | -7.33 (-15.49 to 0.83)           | 0.078                      |
| • Consultant                                                                          | -4.94 (-7.72 to -2.17)           | < 0.001                    |
| <b>I have been able to request and take study when I wanted (baseline = Neutral)</b>  |                                  |                            |
| • Strongly disagree                                                                   | 3.45 (-0.19 to 7.10)             | 0.063                      |
| • Disagree                                                                            | 3.57 (0.53 to 6.61)              | 0.022                      |
| • Agree                                                                               | -1.18 (-3.36 to 1.00)            | 0.290                      |
| • Strongly agree                                                                      | -6.32 (-9.23 to -3.41)           | < 0.001                    |
| <b>I have been able to request and take annual when I wanted (baseline = Neutral)</b> |                                  |                            |
| • Strongly disagree                                                                   | 6.42 (2.69 to 10.15)             | 0.001                      |
| • Disagree                                                                            | 1.37 (-1.73 to 4.47)             | 0.385                      |
| • Agree                                                                               | -2.60 (-5.07 to -0.13)           | 0.039                      |
| • Strongly agree                                                                      | -4.31 (-7.33 to -1.28)           | 0.005                      |
| <b>Proportion of time spent working out of hours (baseline = 0-25%)</b>               |                                  |                            |
| • 26-50%                                                                              | 5.96 (3.16 to 8.76)              | < 0.001                    |
| • 51-75%                                                                              | 10.39 (7.54 to 13.25)            | < 0.001                    |
| • 76-100%                                                                             | 14.34 (10.92 to 17.75)           | < 0.001                    |

## Need for recovery amongst Emergency Physicians in the United Kingdom and Ireland: Findings from a Trainee Emergency Research Network (TERN) survey study

### Research Checklist: The Checklist for Reporting Results of Internet E-Surveys (CHERRIES)

| <b>CHERRIES CHECKLIST ADAPTED FROM:</b>                                                                                                                                                                                            |                                  |                                                                                                                                                                                                                                                                                                                                                                      |                                                                      |
|------------------------------------------------------------------------------------------------------------------------------------------------------------------------------------------------------------------------------------|----------------------------------|----------------------------------------------------------------------------------------------------------------------------------------------------------------------------------------------------------------------------------------------------------------------------------------------------------------------------------------------------------------------|----------------------------------------------------------------------|
| Eysenbach, Gunther. "Improving the quality of Web surveys: the Checklist for Reporting Results of Internet E-Surveys (CHERRIES)." <i>Journal of medical Internet research</i> vol. 6,3 e34. 29 Sep. 2004, doi:10.2196/jmir.6.3.e34 |                                  |                                                                                                                                                                                                                                                                                                                                                                      |                                                                      |
| <b>Item Category</b>                                                                                                                                                                                                               | <b>Checklist Item</b>            | <b>Explanation</b>                                                                                                                                                                                                                                                                                                                                                   | <b>Checklist Response</b>                                            |
| <b>IRB (Institutional Review Board) approval and informed consent process</b>                                                                                                                                                      | Describe survey design           | Describe target population, sample frame. Is the sample a convenience sample? (In "open" surveys this is most likely.)                                                                                                                                                                                                                                               | <b>Outlined in 'Methods'</b>                                         |
|                                                                                                                                                                                                                                    | IRB approval                     | Mention whether the study has been approved by an IRB.                                                                                                                                                                                                                                                                                                               | <b>Outlined in 'Ethics Approval'</b>                                 |
|                                                                                                                                                                                                                                    | Informed consent                 | Describe the informed consent process. Where were the participants told the length of time of the survey, which data were stored and where and for how long, who the investigator was, and the purpose of the study?                                                                                                                                                 | <b>Outlined in Survey Distribution, monitoring and recruitment</b>   |
|                                                                                                                                                                                                                                    | Data protection                  | If any personal information was collected or stored, describe what mechanisms were used to protect unauthorized access.                                                                                                                                                                                                                                              | <b>Outlined in Survey Distribution, monitoring and recruitment</b>   |
| <b>Development and pre-testing</b>                                                                                                                                                                                                 | Development and testing          | State how the survey was developed, including whether the usability and technical functionality of the electronic questionnaire had been tested before fielding the questionnaire.                                                                                                                                                                                   | <b>Outlined in 'Survey Development'</b>                              |
| <b>Recruitment process and description of the sample having access to the questionnaire</b>                                                                                                                                        | Open survey versus closed survey | An "open survey" is a survey open for each visitor of a site, while a closed survey is only open to a sample which the investigator knows (password-protected survey).                                                                                                                                                                                               | <b>Outlined in Survey Distribution, monitoring and recruitment</b>   |
|                                                                                                                                                                                                                                    | Contact mode                     | Indicate whether or not the initial contact with the potential participants was made on the Internet. (Investigators may also send out questionnaires by mail and allow for Web-based data entry.)                                                                                                                                                                   | <b>Outlined in 'Survey Distribution, monitoring and recruitment'</b> |
|                                                                                                                                                                                                                                    | Advertising the survey           | How/where was the survey announced or advertised? Some examples are offline media (newspapers), or online (mailing lists – If yes, which ones?) or banner ads (Where were these banner ads posted and what did they look like?). It is important to know the wording of the announcement as it will heavily influence who chooses to participate. Ideally the survey | <b>Outlined in 'Survey Distribution, monitoring and recruitment'</b> |

|                              |                                          |                                                                                                                                                                                                                                                                                                                                                                                                                                              |                                                                      |
|------------------------------|------------------------------------------|----------------------------------------------------------------------------------------------------------------------------------------------------------------------------------------------------------------------------------------------------------------------------------------------------------------------------------------------------------------------------------------------------------------------------------------------|----------------------------------------------------------------------|
|                              |                                          | announcement should be published as an appendix.                                                                                                                                                                                                                                                                                                                                                                                             |                                                                      |
| <b>Survey administration</b> | Web/E-mail                               | State the type of e-survey (eg, one posted on a Web site, or one sent out through e-mail). If it is an e-mail survey, were the responses entered manually into a database, or was there an automatic method for capturing responses?                                                                                                                                                                                                         | <b>Outlined in 'Survey Distribution, monitoring and recruitment'</b> |
|                              | Context                                  | Describe the Web site (for mailing list/newsgroup) in which the survey was posted. What is the Web site about, who is visiting it, what are visitors normally looking for? Discuss to what degree the content of the Web site could pre-select the sample or influence the results. For example, a survey about vaccination on a anti-immunization Web site will have different results from a Web survey conducted on a government Web site | <b>Outlined in 'Design'</b>                                          |
|                              | Mandatory/voluntary                      | Was it a mandatory survey to be filled in by every visitor who wanted to enter the Web site, or was it a voluntary survey?                                                                                                                                                                                                                                                                                                                   | <b>Outlined in 'Survey Distribution, monitoring and recruitment'</b> |
|                              | Incentives                               | Were any incentives offered (eg, monetary, prizes, or non-monetary incentives such as an offer to provide the survey results)?                                                                                                                                                                                                                                                                                                               | <b>No</b>                                                            |
|                              | Time/Date                                | In what timeframe were the data collected?                                                                                                                                                                                                                                                                                                                                                                                                   | <b>Outlined in 'Sites and settings'</b>                              |
|                              | Randomization of items or questionnaires | To prevent biases items can be randomized or alternated.                                                                                                                                                                                                                                                                                                                                                                                     | <b>Not done</b>                                                      |
|                              | Adaptive questioning                     | Use adaptive questioning (certain items, or only conditionally displayed based on responses to other items) to reduce number and complexity of the questions                                                                                                                                                                                                                                                                                 | <b>Outlined in Survey Distribution, monitoring and recruitment</b>   |
|                              | Number of Items                          | What was the number of questionnaire items per page? The number of items is an important factor for the completion rate.                                                                                                                                                                                                                                                                                                                     | <b>Outlined in 'Design'</b>                                          |
|                              | Number of screens (pages)                | Over how many pages was the questionnaire distributed? The number of items is an important factor for the completion rate.                                                                                                                                                                                                                                                                                                                   | <b>Outlined in 'Design'</b>                                          |
|                              | Completeness check                       | It is technically possible to do consistency or completeness checks before the questionnaire is submitted. Was this done, and if "yes", how (usually JavaScript)? An alternative is to check for completeness after the questionnaire has been submitted (and highlight mandatory items). If this has been done, it should be reported. All items should provide a non-response option such as "not applicable" or                           | <b>Not done</b>                                                      |

|                                                             |                                                                                                           |                                                                                                                                                                                                                                                                                                                                                                                                                                                                                                                                |                                                                                            |
|-------------------------------------------------------------|-----------------------------------------------------------------------------------------------------------|--------------------------------------------------------------------------------------------------------------------------------------------------------------------------------------------------------------------------------------------------------------------------------------------------------------------------------------------------------------------------------------------------------------------------------------------------------------------------------------------------------------------------------|--------------------------------------------------------------------------------------------|
|                                                             |                                                                                                           | “rather not say”, and selection of one response option should be enforced.                                                                                                                                                                                                                                                                                                                                                                                                                                                     |                                                                                            |
|                                                             | Review step                                                                                               | State whether respondents were able to review and change their answers (eg, through a Back button or a Review step which displays a summary of the responses and asks the respondents if they are correct).                                                                                                                                                                                                                                                                                                                    | <b><i>Outlined in Survey Distribution, monitoring and recruitment</i></b>                  |
| <b>Response rates</b>                                       | Unique site visitor                                                                                       | If you provide view rates or participation rates, you need to define how you determined a unique visitor. There are different techniques available, based on IP addresses or cookies or both.                                                                                                                                                                                                                                                                                                                                  | <b><i>Outlined in ‘Results’</i></b>                                                        |
|                                                             | View rate (Ratio of unique survey visitors/unique site visitors)                                          | Requires counting unique visitors to the first page of the survey, divided by the number of unique site visitors (not page views!). It is not unusual to have view rates of less than 0.1 % if the survey is voluntary                                                                                                                                                                                                                                                                                                         | <b><i>Survey site contains first page of survey therefore N/A</i></b>                      |
|                                                             | Participation rate (Ratio of unique visitors who agreed to participate/unique first survey page visitors) | Count the unique number of people who filled in the first survey page (or agreed to participate, for example by checking a checkbox), divided by visitors who visit the first page of the survey (or the informed consents page, if present). This can also be called “recruitment” rate.                                                                                                                                                                                                                                      | <b><i>Outlined in ‘Results’</i></b>                                                        |
|                                                             | Completion rate (Ratio of users who finished the survey/users who agreed to participate)                  | The number of people submitting the last questionnaire page, divided by the number of people who agreed to participate (or submitted the first survey page). This is only relevant if there is a separate “informed consent” page or if the survey goes over several pages. This is a measure for attrition. Note that “completion” can involve leaving questionnaire items blank. This is not a measure for how completely questionnaires were filled in. (If you need a measure for this, use the word “completeness rate”.) | <b><i>Outlined in ‘Results’</i></b>                                                        |
| <b>Preventing multiple entries from the same individual</b> | Cookies used                                                                                              | Indicate whether cookies were used to assign a unique user identifier to each client computer. If so, mention the page on which the cookie was set and read, and how long the cookie was valid. Were duplicate entries avoided by preventing users access to the survey twice; or were duplicate database entries having the same user ID eliminated before analysis? In the latter case, which entries were kept for analysis (eg, the first entry or the most recent)?                                                       | <b><i>Not used</i></b>                                                                     |
|                                                             | IP check                                                                                                  | Indicate whether the IP address of the client computer was used to identify potential duplicate entries from the same user. If so, mention the period of                                                                                                                                                                                                                                                                                                                                                                       | <b><i>Not used due to survey being completed on multi-user/single log-in computers</i></b> |

|                 |                                                     |                                                                                                                                                                                                                                                                                                                                                                                                                                   |                                    |
|-----------------|-----------------------------------------------------|-----------------------------------------------------------------------------------------------------------------------------------------------------------------------------------------------------------------------------------------------------------------------------------------------------------------------------------------------------------------------------------------------------------------------------------|------------------------------------|
|                 |                                                     | time for which no two entries from the same IP address were allowed (eg, 24 hours). Were duplicate entries avoided by preventing users with the same IP address access to the survey twice; or were duplicate database entries having the same IP address within a given period of time eliminated before analysis? If the latter, which entries were kept for analysis (eg, the first entry or the most recent)?                 |                                    |
|                 | Log file analysis                                   | Indicate whether other techniques to analyze the log file for identification of multiple entries were used. If so, please describe.                                                                                                                                                                                                                                                                                               | <b>Not done</b>                    |
|                 | Registration                                        | In "closed" (non-open) surveys, users need to login first and it is easier to prevent duplicate entries from the same user. Describe how this was done. For example, was the survey never displayed a second time once the user had filled it in, or was the username stored together with the survey results and later eliminated? If the latter, which entries were kept for analysis (eg, the first entry or the most recent)? | <b>N/A</b>                         |
| <b>Analysis</b> | Handling of incomplete questionnaires               | Were only completed questionnaires analyzed? Were questionnaires which terminated early (where, for example, users did not go through all questionnaire pages) also analyzed?                                                                                                                                                                                                                                                     | <b>Outlined in 'Data Analysis'</b> |
|                 | Questionnaires submitted with an atypical timestamp | Some investigators may measure the time people needed to fill in a questionnaire and exclude questionnaires that were submitted too soon. Specify the timeframe that was used as a cut-off point, and describe how this point was determined                                                                                                                                                                                      | <b>N/A</b>                         |
|                 | Statistical correction                              | Indicate whether any methods such as weighting of items or propensity scores have been used to adjust for the non-representative sample; if so, please describe the methods.                                                                                                                                                                                                                                                      | <b>Outlined in 'Data Analysis'</b> |

# BMJ Open

## Need for recovery amongst Emergency Physicians in the United Kingdom and Ireland: a cross-sectional survey

|                                 |                                                                                                                                                                                                                                                                                                                                                                                                                                                                                                                                                                                                                                                                                                                                                                                                                       |
|---------------------------------|-----------------------------------------------------------------------------------------------------------------------------------------------------------------------------------------------------------------------------------------------------------------------------------------------------------------------------------------------------------------------------------------------------------------------------------------------------------------------------------------------------------------------------------------------------------------------------------------------------------------------------------------------------------------------------------------------------------------------------------------------------------------------------------------------------------------------|
| Journal:                        | <i>BMJ Open</i>                                                                                                                                                                                                                                                                                                                                                                                                                                                                                                                                                                                                                                                                                                                                                                                                       |
| Manuscript ID                   | bmjopen-2020-041485.R2                                                                                                                                                                                                                                                                                                                                                                                                                                                                                                                                                                                                                                                                                                                                                                                                |
| Article Type:                   | Original research                                                                                                                                                                                                                                                                                                                                                                                                                                                                                                                                                                                                                                                                                                                                                                                                     |
| Date Submitted by the Author:   | 26-Aug-2020                                                                                                                                                                                                                                                                                                                                                                                                                                                                                                                                                                                                                                                                                                                                                                                                           |
| Complete List of Authors:       | Cottey, Laura; University Hospitals Plymouth NHS Trust, Emergency Department; Royal Centre for Defence Medicine, Academic Department of Military Emergency Medicine<br>Roberts, Tom; The Royal College of Emergency Medicine, Graham, Blair; University of Plymouth; Plymouth Hospitals NHS Foundation Trust, Emergency Department<br>Horner , Daniel; The Royal College of Emergency Medicine; Salford Royal Hospitals NHS Trust, Department of Intensive Care<br>Stevens, Kara; University of Plymouth, Medical Statistics<br>Enki, Doyo; University of Nottingham, Medical Statistics<br>Lyttle, Mark; Bristol Royal Hospital for Children, Emergency Department; University of the West of England, Faculty of Health and Applied Science<br>Latour, Jos; University of Plymouth School of Nursing and Midwifery, |
| <b>Primary Subject Heading</b>: | Emergency medicine                                                                                                                                                                                                                                                                                                                                                                                                                                                                                                                                                                                                                                                                                                                                                                                                    |
| Secondary Subject Heading:      | Medical management, Occupational and environmental medicine, Health services research                                                                                                                                                                                                                                                                                                                                                                                                                                                                                                                                                                                                                                                                                                                                 |
| Keywords:                       | ACCIDENT & EMERGENCY MEDICINE, HEALTH SERVICES ADMINISTRATION & MANAGEMENT, Human resource management < HEALTH SERVICES ADMINISTRATION & MANAGEMENT, Organisation of health services < HEALTH SERVICES ADMINISTRATION & MANAGEMENT, OCCUPATIONAL & INDUSTRIAL MEDICINE                                                                                                                                                                                                                                                                                                                                                                                                                                                                                                                                                |
|                                 |                                                                                                                                                                                                                                                                                                                                                                                                                                                                                                                                                                                                                                                                                                                                                                                                                       |

SCHOLARONE™  
Manuscripts



I, the Submitting Author has the right to grant and does grant on behalf of all authors of the Work (as defined in the below author licence), an exclusive licence and/or a non-exclusive licence for contributions from authors who are: i) UK Crown employees; ii) where BMJ has agreed a CC-BY licence shall apply, and/or iii) in accordance with the terms applicable for US Federal Government officers or employees acting as part of their official duties; on a worldwide, perpetual, irrevocable, royalty-free basis to BMJ Publishing Group Ltd ("BMJ") its licensees and where the relevant Journal is co-owned by BMJ to the co-owners of the Journal, to publish the Work in this journal and any other BMJ products and to exploit all rights, as set out in our [licence](#).

The Submitting Author accepts and understands that any supply made under these terms is made by BMJ to the Submitting Author unless you are acting as an employee on behalf of your employer or a postgraduate student of an affiliated institution which is paying any applicable article publishing charge ("APC") for Open Access articles. Where the Submitting Author wishes to make the Work available on an Open Access basis (and intends to pay the relevant APC), the terms of reuse of such Open Access shall be governed by a Creative Commons licence – details of these licences and which [Creative Commons](#) licence will apply to this Work are set out in our licence referred to above.

Other than as permitted in any relevant BMJ Author's Self Archiving Policies, I confirm this Work has not been accepted for publication elsewhere, is not being considered for publication elsewhere and does not duplicate material already published. I confirm all authors consent to publication of this Work and authorise the granting of this licence.

1  
2  
3 1 **Need for recovery amongst Emergency Physicians in the United**  
4 **Kingdom and Ireland: a cross-sectional survey**  
5  
6  
7 3

8 4 Laura COTTEY, BM, BSc (Hons), MSc; Tom ROBERTS, MBChB; Blair  
9 5 GRAHAM, BMBS, BSc (Hons); Daniel HORNER, BA, MBBS, MD; Kara  
10 6 STEVENS, PhD; Doyo ENKI, PhD; Mark D LYTTLE, MBChB; Jos M.  
11 7 LATOUR, RN, PhD; On behalf of the Trainee Emergency Research Network  
12 8 (TERN) and Paediatric Emergency Research in the UK and Ireland (PERUKI).  
13  
14  
15  
16  
17 9

18  
19 10 Dr Laura COTTEY

20 11 Academic Clinical Fellow Emergency Medicine, University Hospitals Plymouth  
21 12 NHS Trust, UK

22 13 Academic Department of Military Emergency Medicine, Royal Centre for  
23 14 Defence Medicine, Birmingham, UK

24 15 Dr Tom ROBERTS

25 16 Research Fellow Trainee Emergency Research Network (TERN), Royal  
26 17 College of Emergency Medicine, London, UK.

27 18 Dr Blair GRAHAM

28 19 Lecturer in Urgent & Emergency Care, Faculty of Health, Plymouth University,  
29 20 UK

30 21 Speciality Registrar in Emergency Medicine, University Hospitals Plymouth  
31 22 NHS Trust, UK

32 23 Professor Daniel HORNER

33 24 Professor of the Royal College of Emergency Medicine

34 25 Consultant in Emergency and Critical Care Medicine, Salford Royal NHS  
35 26 Foundation Trust, UK

36 27 Dr Kara STEVENS

37 28 Research Fellow in Medical Statistics, Faculty of Health, University of  
38 29 Plymouth, UK

39 30 Dr Doyo ENKI

40 31 Senior Medical Statistician, Faculty of Medicine & Health Sciences, University  
41 32 of Nottingham, UK

42 33 Dr Mark D. LYTTLE

43 34 Emergency Department, Bristol Royal Hospital for Children, Bristol, UK



1  
2  
3 35 Faculty of Health and Applied Sciences, University of the West of England,  
4  
5 36 Bristol, UK

6  
7 37 Professor Jos M. LATOUR

8  
9 38 Professor of Clinical Nursing, Faculty of Health, University of Plymouth, UK

10  
11 39

12 40 The list of Trainee Emergency Research Network and Paediatric Emergency  
13  
14 41 Research in the UK and Ireland collaborators is included at the end of the  
15  
16 42 statements section.

17  
18 43

19 44 **Corresponding Author**

20  
21 45 Dr Laura Cottey

22 46 Academic Department of Military Emergency Medicine

23  
24 47 Royal Centre for Defence Medicine

25  
26 48 ICT Centre

27  
28 49 Birmingham Research Park

29  
30 50 Vincent Drive

31  
32 51 Edgbaston

33  
34 52 Birmingham

35  
36 53 B15 2SQ

37  
38 54 Email: laurajcottey@gmail.com

39  
40 55 Phone 07470 277184

41  
42 56

43  
44 57 **Manuscript data:**

45  
46 58 Abstract: 299

47  
48 59 Word Count (Main Body): 3383

49  
50 60 References: 47

51  
52 61 Electronic Supplementary Material: 5

53  
54 62 Figures: 2

55  
56 63 Tables: 4

57  
58 64

59  
60 65 **Keywords:** Emergency Medicine; Human resource management;

61  
62 66 Organisation of health services; Occupational and Industrial medicine.

63  
64 67

1  
2  
3 68 **ABSTRACT**  
4

5 69 **Objectives:** To determine the need for recovery (NFR) among Emergency  
6  
7  
8 70 Physicians and to identify demographic and occupational characteristics  
9  
10 71 associated with higher NFR scores.  
11

12 72 **Design:** Cross-sectional electronic survey.  
13

14 73 **Setting:** Emergency Departments (ED) (n=112) in the United Kingdom and  
15  
16  
17 74 Ireland.  
18

19 75 **Participants:** Emergency Physicians, defined as any registered physician  
20  
21 76 working principally within the ED, responding between June-July 2019.  
22

23 77 **Main outcome measure:** NFR scale, an 11-item self-administered  
24  
25  
26 78 questionnaire that assesses how work demands affect inter-shift recovery.  
27

28 79 **Results:** The median NFR score for all 4247 eligible, consented participants  
29  
30 80 with a valid NFR score was 70.0 (95% CI: 65.5 to 74.5), with an IQR of 45.5–  
31  
32  
33 81 90.0. A linear regression model indicated statistically significant associations  
34  
35 82 between gender, health conditions, type of ED, clinical grade, access to  
36  
37 83 annual and study leave, and time spent working out-of-hours. Groups  
38  
39 84 including male physicians, consultants, General Practitioners within the ED,  
40  
41 85 those working in paediatric EDs and those with no long-term health condition  
42  
43 86 or disability had a lower NFR score. After adjusting for these characteristics,  
44  
45 87 the NFR score increased by 3.7 (95% CI: 0.3 to 7.1) and 6.43 (95% CI: 2.0 to  
46  
47 88 10.8) for those with difficulty accessing annual and study leave, respectively.  
48  
49 89 Increased percentage of out-of-hours work increased NFR score almost  
50  
51 90 linearly: 26-50% out-of-hours work = 5.7 (95% CI: 3.1 to 8.4); 51-75% out-of-  
52  
53 91 hours work = 10.3 (95% CI: 7.6 to 13.0); 76-100% out-of-hours work = 14.5  
54  
55  
56 92 (95% CI: 11.0 to 17.9).  
57  
58  
59  
60

1  
2  
3 93 **Conclusion:** Higher NFR scores were observed among Emergency  
4  
5 94 Physicians than reported in any other profession or population to date. Whilst  
6  
7 95 out-of-hours working is unavoidable, the linear relationship observed suggests  
8  
9 96 that any reduction may result in NFR improvement. Evidence-based  
10  
11 97 strategies to improve well-being such as proportional out-of-hours working  
12  
13 98 and improved access to annual and study leave should be carefully  
14  
15 99 considered and implemented where feasible.  
16  
17  
18  
19  
20  
21  
22  
23  
24  
25  
26  
27  
28  
29  
30  
31  
32  
33  
34  
35  
36  
37  
38  
39  
40  
41  
42  
43  
44  
45  
46  
47  
48  
49  
50  
51  
52  
53  
54  
55  
56  
57  
58  
59  
60

1  
2  
3 118 **ARTICLE SUMMARY**

4  
5 119  
6 120 **Strengths and limitations of this study**

- 7 121  
8 122  
9 123 • This is the first study evaluating the need for recovery (NFR) scale within a  
10  
11 large healthcare population.  
12 124  
13  
14 125  
15  
16 126 • The inclusion of responses from over half of all UK Emergency  
17  
18 Departments indicates the results are likely to be generalisable.  
19 127  
20  
21 128  
22  
23 129 • The high volume of responses, with over half of study sites exceeding 70%  
24  
25 participant response rates, indicates that the NFR scale is an acceptable  
26 130  
27 measurement tool for physicians.  
28 131  
29  
30 132  
31  
32 133 • The study is limited by the single-point of time measurement therefore  
33  
34 seasonal bias cannot be excluded and further assessment of test-retest  
35 134  
36 reliability is desirable.  
37 135  
38  
39 136  
40  
41 137 • The use of self-administered dichotomous questionnaires is acknowledged  
42  
43 to limit wider insights into physician recovery and well-being.  
44 138  
45  
46  
47  
48  
49  
50  
51  
52  
53  
54  
55  
56  
57  
58  
59  
60

## 139 INTRODUCTION

140 Recruitment and retention challenges in acute care pose a significant and  
141 ongoing threat to effective healthcare provision. The need to maintain a healthy  
142 and sustainable workforce is vital to safeguard future services.[1] Physician  
143 well-being is a key influence on retention, with low job satisfaction and high  
144 levels of stress directly leading to concern over job sustainability.[2–4] Globally,  
145 high rates of physician burnout are increasingly recognised, along with the  
146 consequent negative impact on delivery of high quality patient care.[5–10]

147 The Need for Recovery (NFR) scale measures the subjective perception  
148 of the need to recuperate from physical and mental demands of a working day,  
149 and is a suitable tool with which to assess the early symptoms of fatigue in shift  
150 workers.[11,12] Within unscheduled care settings such as emergency  
151 medicine, shift work is often of high intensity, and additional factors such as  
152 department crowding, pressured resources and inability to control patient  
153 volume may also influence NFR. Where fatigue does occur and cannot be  
154 sufficiently recovered between shifts, the effect is cumulative and may lead to  
155 increased occupational stress and impaired long-term health.[13,14]

156  
157 Burnout inventories are increasingly utilised as an attempt to measure  
158 physician well-being.[15] Although they provide valuable insight into well-  
159 being, they are not without issue. Limitations include variability in burnout  
160 definitions, time required for completion, ease of completion, respondent  
161 survey fatigue, and difficulty translating results into intervention.[16,17,18]  
162 Additionally, these methods quantify established burnout; once this has  
163 occurred the human and financial resource impact is already immense, with

1  
2  
3 164 associated workforce depletion and negligible mitigation strategies.[19,20]  
4

5 165 The identification of those clinicians *at risk* of burnout, at an early timepoint  
6

7 166 when interventions may be effective, presents a critical challenge.  
8  
9

10 167

11  
12 168 Increasing NFR is associated with the likelihood of progression to  
13

14 169 occupational burnout and health complaints, with negative effects cumulative  
15

16 170 over time in several validation studies [11,13]. Increased NFR may therefore  
17

18 171 precede the onset of sustained occupational burnout, and offer advantages  
19

20 172 over other burnout inventories as a simple quantifiable metric obtained through  
21

22 173 a rapid, standalone, and repeatable 11-item questionnaire. A single centre  
23

24 174 study assessing the utility of the NFR in an ED population reported a high  
25

26 175 response rate (80%) and completion time of less than 10 minutes whilst gaining  
27

28 176 insight into shift patterns, work-life balance and well-being [21]. This might  
29

30 177 suggest that the method of questioning used in the NFR scale and emphasis  
31

32 178 on recovery as opposed to more emotive questioning could be beneficial in  
33

34 179 improving response rates and reducing respondent fatigue in repeat usage. As  
35

36 180 such, NFR may provide a valuable option for regular evaluating of staff well-  
37

38 181 being and identifying opportunity for early intervention in busy EDs. Staff well-  
39

40 182 being is the fourth highest Emergency Medicine (EM) Research Priority  
41

42 183 identified by the James Lind Alliance Priority Setting Partnership, involving  
43

44 184 patients, carers and physicians.[22].  
45  
46

47 185

48 186 We therefore aimed to determine the NFR among Emergency  
49

50 187 Physicians in EDs in the UK and Ireland, and identify demographic and  
51

52 188 occupational characteristics associated with higher NFR scores that might  
53  
54  
55  
56  
57  
58  
59  
60

1  
2  
3 189 allow for early targeted intervention to improve physicians' well-being and  
4  
5 190 reduce burnout.  
6  
7

8 191

9  
10 192 **METHODS**

11  
12 193 This cross-sectional electronic survey study targeted a representative sample  
13  
14 194 of Emergency Physicians working across the UK and Ireland, and was  
15  
16 195 performed and reported in line with the Checklist for Reporting Results of  
17  
18 196 Internet E-surveys.[23] The study was registered at ISRCTN  
19  
20 197 (<https://doi.org/10.1186/ISRCTN21869845>). Ethical approval was obtained  
21  
22 198 from the UK Health Research Authority (Reference: 19/HRA/2404) alongside  
23  
24 199 equivalent approvals in Scotland, Northern Ireland and Ireland.  
25  
26  
27  
28  
29

30  
31 201 **Settings and Participants**

32  
33 202 An initial sample of 100 EDs was deemed necessary to ensure inclusion of  
34  
35 203 greater than 50% of Type 1 EDs, defined as 'an EM consultant-led 24-hour  
36  
37 204 service with full resuscitation facilities', in England. [24] The study was  
38  
39 205 coordinated via the UK Trainee Emergency Research Network (TERN) and  
40  
41 206 delivered in collaboration with Paediatric Emergency Research in the UK and  
42  
43 207 Ireland (PERUKI) and Ireland TERN. [25, 26] Signposting to the survey and  
44  
45 208 enrolment of participants was led by site principal investigators (PI), who were  
46  
47 209 provided with standardised study documentation. Local and national promotion  
48  
49 210 of the study was conducted at professional meetings, through social media,  
50  
51 211 national newsletters, and using the Clinical Research Network infrastructure.  
52  
53

54  
55  
56 212 Physicians of any grade who were registered with either the UK General  
57  
58 213 Medical Council or Irish Medical Council, and who were employed within a  
59  
60

1  
2  
3 214 participating ED, were invited to participate. For the purposes of this study, the  
4  
5 215 term Emergency Physician is defined as all doctors working within the ED. This  
6  
7 216 included; doctors specialising in EM, comprising six years of postgraduate  
8  
9 217 training for full qualification to achieve the grade of Emergency Medicine  
10  
11 218 consultant, or non-EM specialists undertaking rotations in the ED as part of their  
12  
13 219 professional training, including those in the first and second year of  
14  
15 220 postgraduate training and physicians undertaking training in General Practice,  
16  
17 221 Anaesthesia and Acute Medicine who commonly undertake a four to six month  
18  
19 222 ED rotation (Online Supplementary Material 1). Physicians who did not hold a  
20  
21 223 permanent contract with a participating hospital (such as those working ad-hoc  
22  
23 224 locum shifts), those on leave during the study period, and those in a non-clinical  
24  
25 225 role were excluded.

### 226 **Survey Development**

227 The NFR scale consists of 11 items each requiring a dichotomous 'yes' or 'no'  
228 response, originally developed as a subscale of the Dutch Questionnaire on the  
229 Experience and Evaluation of Work (QEEW) (Online Supplementary material  
230 2, page 10).[27] Indicators of fatigue such as reduced motivation for activities  
231 and concentration at the end of a working day are assessed to measure the  
232 effect of work demands experienced. A 'yes' response to an item, with the  
233 exception of question four which is reversed, signals an unfavourable situation.  
234 The total sum of the unfavourable responses is multiplied by 100 and divided  
235 by the total number of scale items, 11, producing an overall score between 0  
236 and 100, with a higher score denoting a greater NFR and increased short-term  
237 work-related fatigue. The NFR has previously been demonstrated to have an  
238 overall Cronbach's alpha of 0.88, a measure of internal consistency and



1  
2  
3 239 questionnaire reliability, with a range of 0.81 to 0.92 in subgroup analyses of  
4  
5 240 the same validation study.[28] Following a minor amendment to one question  
6  
7 241 to increase applicability to the study population (from 'After the evening meal, I  
8  
9 242 generally feel in good shape' to 'After my breaks I feel fresh to continue my  
10  
11 243 work'), feasibility work in a single UK centre demonstrated a Cronbach's alpha  
12  
13 244 of 0.79, and found that the NFR scale was acceptable and user-friendly. [21]  
14  
15

16  
17 245 A patient and public involvement (PPI) consultation was conducted at  
18  
19 246 the UK Emergency Medicine Trainee Association Conference (Cardiff,  
20  
21 247 December 2018), using a semi-structured question guide for mixed focus  
22  
23 248 groups to review a proposed participant survey. A key element of this  
24  
25 249 consultation explored the use of a burnout inventory within the proposed study;  
26  
27 250 concerns relating to respondent fatigue, length of survey and assessment of  
28  
29 251 questions using a Likert scale indicated that such an inventory was not  
30  
31 252 universally acceptable to Emergency Physicians. Based on this consultation,  
32  
33 253 the final participant survey included the 11-item NFR scale used in the feasibility  
34  
35 254 work and 44-items collecting the participants' demographic, occupational and  
36  
37 255 perceived well-being characteristics (Online Supplementary Material 2).  
38  
39 256 Questions relating to 'out-of-hours' work were defined as work outside of  
40  
41 257 normal working office hours (9am until 5pm, Monday to Friday).  
42  
43  
44  
45

46  
47 258 A separate site-specific survey was developed de novo with expert input  
48  
49 259 from experienced EM physicians, consisting of 39-items identified from the  
50  
51 260 literature and/or consensus of the study team, which explored departmental,  
52  
53 261 rota pattern and staffing characteristics likely to provide context for analysis and  
54  
55 262 interpretation of individual survey results (Online Supplementary Material 3).  
56  
57  
58  
59  
60

1  
2  
3 263 Only one site-specific survey was required per participating centre and was  
4  
5 264 completed by the site PI.  
6  
7

### 8 265 **Survey Distribution, monitoring and recruitment**

9  
10 266 All participants were provided with an information sheet, and consented to  
11  
12 267 participation prior to completing the survey; this was voluntary, anonymous, and  
13  
14 268 no incentives were given. Respondents were able to review and change their  
15  
16 269 answers prior to final submission of the survey. Branching logic was used for  
17  
18 270 responses to certain questions. Data were collected during a six-week period  
19  
20 271 from 3rd June 2019. During this period, advertisement of the survey and weekly  
21  
22 272 reminders were sent out via site PIs. The participant and site-specific surveys  
23  
24 273 were open surveys accessed through a link and hosted on a research specific  
25  
26 274 electronic survey platform, Research Electronic Data Capture platform  
27  
28 275 ('REDCap'; University of Bristol), which complies with European General Data  
29  
30 276 Protection Regulations.[29,30]  
31  
32  
33

34  
35 277 Prior to study commencement, site PIs provided a best estimate of  
36  
37 278 eligible participants which accounted for local physician absence due to  
38  
39 279 sickness, leave, and factors such as sabbaticals and professional  
40  
41 280 secondments. This denominator was used to give a best-estimate of the per-  
42  
43 281 site survey response rate, with a stated aim of achieving a 70% response rate.  
44  
45  
46

### 47 282 **Statistical Analysis**

48  
49 283 Statistical analysis was undertaken using STATA 14. [31] Participants were  
50  
51 284 only included in any of the reported analyses if they were from one of the 112  
52  
53 285 registered sites and provided a response for at least eight of the 11 items of the  
54  
55 286 NFR scale as per imputation guidelines. Imputation was performed by replacing  
56  
57 287 missing items with the mean of all completed item responses. [32]  
58  
59  
60

1  
2  
3 288 As one item in the NFR scale was amended due to applicability to the  
4  
5 289 study population, the internal consistency of the NFR scale for all participants  
6  
7  
8 290 with a valid NFR score was calculated by Cronbach's alpha.  
9

10 291 To describe the study sample, the frequency and percentage of  
11  
12 292 participants by site, demographic and occupational characteristics are reported.  
13  
14 293 As the distribution of the NFR score in this study was negatively skewed,  
15  
16  
17 294 summary statistics of the median NFR score are reported with corresponding  
18  
19 295 bootstrapped 95% confidence intervals from 1000 replications (providing there  
20  
21 296 are at least 8 observations to allow for sufficient number of sample  
22  
23 297 combinations), and inter-quartile ranges (IQR) of all eligible participants. Box  
24  
25  
26 298 plots were used as visual aids to identify covariates that may have a statistically  
27  
28 299 significant association with the NFR score and the nature of the relationship.  
29

30 300 To facilitate comparisons with previous published literature and given  
31  
32 301 the large number of participants, we fitted Gaussian, mixed effects, linear  
33  
34 302 regression models to NFR score, where site was included as a random effect  
35  
36 303 to account for potentially unknown differences between EDs. To identify  
37  
38 304 statistically significant associations between the NFR score and observed  
39  
40 305 covariates, the forward model selection procedure was implemented; inclusion  
41  
42 306 in the model was based upon the goodness of fit test at the 5% level of  
43  
44 307 significance, using only participants with complete NFR score and covariate  
45  
46 308 data. The final model was estimated using participants with complete data for  
47  
48 309 the included covariates and NFR score, with the coefficient estimate calculated  
49  
50 310 by adjusting for all covariates reported in the model. Quantile regression was  
51  
52 311 used to confirm the direction and significance of the identified associations  
53  
54 312 under non-parametric assumptions.  
55  
56  
57  
58  
59  
60

313

314 **RESULTS**

315 Characteristics of the 112 participating sites are presented in table 1.

316 **Table 1: Characteristics of sites registered to take part in the survey study**

| Site Characteristics      | N (%)<br>Total = 112 |
|---------------------------|----------------------|
| Country                   |                      |
| England                   | 89 (79.5)            |
| Wales                     | 3 (2.7)              |
| Northern Ireland          | 3 (2.7)              |
| Scotland                  | 12 (10.7)            |
| Republic of Ireland       | 5 (4.4)              |
| ED Annual Attendance      |                      |
| ≤ 50,000                  | 11 (9.8)             |
| 50,001 to 100,000         | 46 (41.1)            |
| >100,000                  | 42 (37.5)            |
| <i>Missing</i>            | 13 (11.6)            |
| Specialist Designation    |                      |
| Trauma Unit (TU)          | 55 (49.1)            |
| Major Trauma Centre (MTC) | 25 (22.3)            |
| Stroke Centre             | 42 (37.5)            |
| PCI Centre                | 30 (26.8)            |

317

318 *ED Emergency department*319 *TU In the UK National Health Service, a hospital that provides care for all except the most*  
320 *severe major trauma patients. May provide initial stabilisation of severely injured patients prior*  
321 *to transfer to an MTC.*322 *MTC A specialist (tertiary) centre responsible for care of the most severely injured patients.*323 *PCI Percutaneous Coronary Intervention*

324

325

326

327 Of 5107 unique visits to the online survey, 4365 of these were registered at one

328 of the 112 sites and provided consent, with 4247 completing at least eight items

329 of the NFR scale. Cronbach's alpha for all participants with a valid NFR score

330 was 0.80. The median NFR score across all eligible participants was 70.0 (95%  
 331 CI: 65.5 to 74.5), with an IQR of 45.5 – 90.0. Figure 1 and Figure 2, and tables  
 332 2 and 3 present a selection of participant's NFR score by demographic and  
 333 occupational characteristics, with additional characteristics presented in the  
 334 Online Supplementary Material 4.

335 **Table 2: Summary statistics of NFR score by participant's characteristics.** Frequency  
 336 and percentage, median Need for Recovery (NFR) score with 95% bootstrapped confidence  
 337 intervals and the inter-quartile range of participants within each category.

| Participant Characteristics                         | N (%)       | NFR Score              |               |
|-----------------------------------------------------|-------------|------------------------|---------------|
|                                                     |             | Median (95% CI)        | [LQ - UQ]     |
| All participants                                    | 4247 (100)  | 70.0 (62.0 to 78.0)    | [45.5 - 90.0] |
| Length of time worked in current ED (months)        |             |                        |               |
| 0 to 3                                              | 740 (17.5)  | 72.7 (71.7 to 73.8)    | [45.5 - 90.9] |
| > 3 to 6                                            | 848 (20.0)  | 72.7 (72.7 to 72.7)    | [54.5 - 90.9] |
| > 6 to 12                                           | 729 (17.2)  | 72.7 (64.7 to 80.7)    | [45.5 - 90.9] |
| > 12 to 24                                          | 370 (8.7)   | 63.6 (58.8 to 68.4)    | [45.5 - 90.9] |
| > 24 to 60                                          | 583 (13.8)  | 63.6 (62.2 to 65.1)    | [36.4 - 81.8] |
| > 60 to 120                                         | 497 (11.7)  | 63.6 (56.7 to 70.5)    | [36.4 - 81.8] |
| > 120                                               | 473 (11.2)  | 54.5 (46.6 to 62.5)    | [36.4 - 81.8] |
| Missing                                             | 7 (0.2)     | 18.2 (NA) <sup>1</sup> | [9.1 - 54.5]  |
| Type of contract                                    |             |                        |               |
| 100%                                                | 3445 (83.5) | 72.7 (67.1 to 78.4)    | [45.5 - 90.9] |
| 90%                                                 | 72 (1.7)    | 63.6 (54.0 to 73.3)    | [36.4 - 81.8] |
| 80%                                                 | 200 (4.8)   | 63.6 (61.4 to 65.8)    | [45.5 - 81.8] |
| 70%                                                 | 116 (2.8)   | 72.7 (63.6 to 81.9)    | [50.0 - 81.8] |
| 60%                                                 | 142 (3.4)   | 63.6 (54.4 to 72.9)    | [45.5 - 90.9] |
| 50%                                                 | 85 (2.1)    | 63.6 (53.5 to 73.7)    | [36.4 - 81.8] |
| < 50%                                               | 66 (1.6)    | 50.0 (35.7 to 64.3)    | [27.3 - 81.8] |
| Missing                                             | 121 (2.9)   | 72.7 (67.8 to 77.7)    | [54.5 - 90.9] |
| Significant caring responsibilities outside of work |             |                        |               |
| No                                                  | 2616 (63.6) | 72.7 (68.5 to 77.0)    | [45.5 - 90.9] |
| Yes                                                 | 1427 (34.7) | 63.6 (62.8 to 64.5)    | [36.4 - 81.8] |
| Prefer not to say                                   | 73 (1.8)    | 81.8 (71.0 to 92.7)    | [54.5 - 90.9] |
| Missing                                             | 131 (3.2)   | 72.7 (68.2 to 77.3)    | [54.5 - 90.9] |

338 <sup>1</sup> Insufficient observations for Bootstrapped 95% confidence intervals based

339 **Table 3: Summary statistics of NFR score by occupational characteristics.** Frequency  
 340 and percentage, median Need for Recovery (NFR) score with 95% bootstrapped confidence  
 341 intervals and the inter-quartile range of participants within each category.  
 342

| Occupational | N (%) | NFR Score |
|--------------|-------|-----------|
|--------------|-------|-----------|

| Characteristics                                                 |             | Median (95% CI) <sup>1</sup> | [LQ - UQ]     |
|-----------------------------------------------------------------|-------------|------------------------------|---------------|
| All participants                                                | 4247 (100)  | 70.0 (62.0 to 78.0)          | [45.5 - 90.0] |
| scheduled weekend work frequency                                |             |                              |               |
| 1 in 2                                                          | 1479 (36.0) | 72.7 (72.3 to 73.2)          | [54.5 - 90.9] |
| 1 in 3                                                          | 865 (21.1)  | 72.7 (68.1 to 77.4)          | [45.5 - 90.9] |
| 1 in 4                                                          | 542 (13.2)  | 63.6 (57.1 to 70.2)          | [45.5 - 81.8] |
| 1 in 5                                                          | 310 (7.5)   | 54.5 (48.4 to 60.7)          | [36.4 - 81.8] |
| 1 in 6                                                          | 485 (11.8)  | 54.5 (49.8 to 59.3)          | [27.3 - 81.8] |
| < 1 in 6                                                        | 307 (7.5)   | 63.6 (55.2 to 72.1)          | [36.4 - 81.8] |
| None                                                            | 121 (2.9)   | 54.5 (45.7 to 63.4)          | [27.3 - 81.8] |
| Missing                                                         | 138 (3.4)   | 72.7 (65.9 to 79.6)          | [45.5 - 90.9] |
| Maximum number of consecutive clinical shifts scheduled to work |             |                              |               |
| 1                                                               | 52 (1.3)    | 63.6 (45.1 to 82.2)          | [27.3 - 90.9] |
| 2                                                               | 190 (4.6)   | 54.5 (47.6 to 61.5)          | [27.3 - 72.7] |
| 3                                                               | 465 (11.3)  | 63.6 (60.3 to 67.0)          | [36.4 - 81.8] |
| 4                                                               | 783 (19)    | 63.6 (63.0 to 64.3)          | [45.5 - 81.8] |
| 5                                                               | 827 (20.1)  | 72.7 (66.2 to 79.3)          | [45.5 - 81.8] |
| 6                                                               | 389 (9.5)   | 72.7 (67.3 to 78.2)          | [45.5 - 90.0] |
| 7                                                               | 855 (20.8)  | 72.7 (70.8 to 74.6)          | [45.5 - 90.9] |
| 8                                                               | 554 (13.5)  | 72.7 (66.5 to 78.9)          | [54.5 - 90.9] |
| Missing                                                         | 132 (3.2)   | 72.7 (67.9 to 77.6)          | [54.5 - 90.9] |

<sup>1</sup> Bootstrapped 95% confidence intervals based on 1000 replications on a minimum of 8 observations.

Only 7.5% of the participants were aged over 50 years, and the majority were aged between 26 and 30 years (28.6%). NFR score appeared to decrease with age, such that those in age groups 20 to 35 years all had a median score of 72.7, age groups 36 to 55 had a median score of 63.6, and those over 55 years had a median score of 54.5 (figure 1a). There was a reasonable balance between males and females, with just over 1% who did not submit a response (missing), preferred not to say or other. Females had a higher median NFR score of 72.7 (95% CI: 70.5 to 75.0) compared with males 63.6 (95% CI: 60.8 to 66.5) (figure 1b). Within clinical grade, consultants accounted for over a quarter of the participants who (with GPs) had the lowest median NFR score of 54.5 (consultants 95% CI: 53.6 to 55.5) compared with 72.7 in all other grades (figure 1c). The majority of participants had no long-term health conditions or

1  
2  
3 358 disability (88.6%), with a lower NFR score of 63.6 (95% CI 60.2 to 67.1)  
4  
5 359 compared with those who did report a long-term health condition or disability  
6  
7 360 72.7 (95% CI: 66.2 to 79.2) (figure 1d). Most participants worked full time  
8  
9 361 (83.5%), but overall, the NFR score did not decrease as contract proportion  
10  
11 362 decreased (table 2). Over half (54.6%) had been working in their current ED for  
12  
13 363 1 year or less and generally had higher NFR scores compared to those present  
14  
15 364 for over 1 year. Less than 35% of participants declared significant caring  
16  
17 365 responsibilities outside of work, but those who do had a lower median NFR  
18  
19 366 score (63.6, 95% CI: 62.8 to 64.5) than those who did not (72.7, 95% CI: 68.5  
20  
21 367 to 77.0).  
22  
23  
24  
25  
26

27 368 Most of the participants agreed or strongly agreed they were able to  
28  
29 369 obtain study or annual leave when requested (68% and >73%, respectively).  
30  
31 370 As the ability to obtain study and annual leave on request increased, the NFR  
32  
33 371 score decreased from 81.8 (95% CI: 81.4 to 82.2) to 54.5 (95% CI: 49.4 to 59.7)  
34  
35 372 for study leave and 81.8 (95% CI: 76.4 to 87.2) to 60.0 (95% CI: 51.8 to 68.2)  
36  
37 373 for annual leave (figures 2a and 2b). There was evidence the NFR score  
38  
39 374 increased as the proportion of time working out-of-hours increased, from 54.5  
40  
41 375 (95% CI: 47.8 to 61.3) to 81.8 (95% CI: 75.4 to 88.3) (figure 2c). Over 75% of  
42  
43 376 participants spent the majority of their time in adult EM with a median NFR  
44  
45 377 score of 72.7 for mixed or adult only, which was higher when compared with  
46  
47 378 paediatrics only 63.6 (95% CI: 55.2 to 72.1) (figure 2d). Most participants  
48  
49 379 worked 1 in 2 weekends (36%) with a median NFR score of 72.7, which  
50  
51 380 decreased to 54.5 for those who did not work any weekend shifts (see table 3).  
52  
53 381 Over 50% reported working 5 to 8 consecutive clinical shifts and had a median  
54  
55  
56  
57  
58  
59  
60

382 NFR score of 72.7, compared with those who worked less than five who had a  
383 median NFR  $\leq$  63.6.

384 The summary statistics of the final regression model are presented in  
385 table 4.

386 **Table 4: Summary of final Gaussian, mixed effects, linear regression model fitted to the**  
387 **Need for Recovery (NFR) score, including the adjusted coefficient estimate (Adj. Coef.**  
388 **Est.) with corresponding 95% confidence interval (CI) and p-value.**

|                                                                                | Adj. Coeff. Est. (95% CI) <sup>1</sup> | P-value <sup>2</sup> |
|--------------------------------------------------------------------------------|----------------------------------------|----------------------|
| Constant<br>(baseline NFR score)                                               | 59.51(55.53 to 63.49)                  | < 0.001              |
| Gender (baseline = Male)                                                       |                                        |                      |
| • Female                                                                       | 3.40(1.80 to 4.99)                     | < 0.001              |
| • Other/Prefer not to say                                                      | -0.46(-9.07 to 8.15)                   | 0.916                |
| Any long-term health conditions or disabilities (baseline = No)                |                                        |                      |
| • Yes                                                                          | 8.52(5.67 to 11.36)                    | < 0.001              |
| • Prefer not to say                                                            | 6.24(1.52 to 10.95)                    | 0.01                 |
| ED paediatrics only? (baseline = No)                                           |                                        |                      |
| • Yes                                                                          | -7.08(-10.4 to -3.77)                  | < 0.001              |
| Clinical grade (baseline = Foundation)                                         |                                        |                      |
| • ST1-ST2                                                                      | -0.08(-2.67 to 2.51)                   | 0.953                |
| • > ST2                                                                        | 1.32(-1.37 to 4.01)                    | 0.336                |
| • SASG                                                                         | -1.13(-4.27 to 2.02)                   | 0.482                |
| • GP                                                                           | -8.26(-15.09 to -1.44)                 | 0.018                |
| • Consultant                                                                   | -5.30(-8.07 to -2.53)                  | < 0.001              |
| I have been able to request and take study when I wanted (baseline = Neutral)  |                                        |                      |
| • Strongly disagree                                                            | 4.23(-0.26 to 8.71)                    | 0.065                |
| • Disagree                                                                     | 3.72(0.29 to 7.15)                     | 0.034                |
| • Agree                                                                        | -1.32(-3.60 to 0.96)                   | 0.257                |
| • Strongly agree                                                               | -6.50(-9.43 to -3.56)                  | < 0.001              |
| I have been able to request and take annual when I wanted (baseline = Neutral) |                                        |                      |
| • Strongly disagree                                                            | 6.43(2.03 to 10.83)                    | 0.004                |
| • Disagree                                                                     | 1.13(-2.34 to 4.61)                    | 0.523                |
| • Agree                                                                        | -2.84(-5.54 to -0.14)                  | 0.039                |
| • Strongly agree                                                               | -4.89(-8.06 to -1.72)                  | 0.002                |
| Proportion of time spent working out-of-hours (baseline = 0-25%)               |                                        |                      |
| • 26-50%                                                                       | 5.74(3.13 to 8.35)                     | < 0.001              |



|           |                       |         |
|-----------|-----------------------|---------|
| • 51-75%  | 10.32(7.60 to 13.03)  | < 0.001 |
| • 76-100% | 14.45(10.97 to 17.92) | < 0.001 |

389 <sup>1</sup> Each coefficient estimate is adjusted for all other covariates in the model

390 <sup>2</sup> Null hypothesis: Adjusted Coefficient Estimate = 0 (i.e. is there statistically significant  
391 evidence this category differs from the baseline category)

392 <sup>ST1-ST2</sup> *Specialist training year 1-2 (this included physicians training in Anaesthetics, Emergency  
393 Medicine, Acute Medicine and General Practice)*

394 <sup>SASG</sup> *Staff grade, associate specialist and speciality grade*

395 <sup>GP</sup> *General Practitioner working within the ED*

396

397 This model was based on 3979 participants with complete data for all the  
398 included covariates. Quantile regression confirmed the direction and  
399 significance of the associations remained the same (Online Supplementary  
400 Material 5). Each covariate was adjusted for all other statistically significant  
401 associations. The results from this model indicated there were statistically  
402 significant associations between gender, health conditions, type of ED (adult  
403 or paediatric), clinical grade, access to annual and study leave, and time  
404 spent working out-of-hours. The model suggested that males, GPs or  
405 consultants, those working in paediatrics and those with no long-term health  
406 condition or disability had the lowest NFR score. The greatest increase in  
407 NFR score was associated with those who reported more than a 75%  
408 proportion of out-of-hours work (14.45: 95% CI 10.97 to 17.92). If participants  
409 strongly agreed they were able to obtain study leave upon request this  
410 reduced their NFR score by 6.5 (95% CI: 3.56 to 9.43) and annual leave could  
411 reduce their NFR score 4.89 (95% CI 1.72 to 8.06).

412

## 413 **DISCUSSION**

414 Emergency Physicians in the UK and Ireland have a higher NFR score than  
415 has been reported in any previously studied population.[11,33–37] Three

1  
2  
3 416 modifiable occupational factors were significantly associated with higher NFR  
4  
5 417 scores (poor access to annual leave, and study leave, and proportion of out-of-  
6  
7 418 hours work), and four further non-modifiable demographic factors were  
8  
9 419 associated with a decreased NFR score. These were the senior grade of EM  
10  
11 420 consultant, male gender, absence of long-term health condition or disability,  
12  
13 421 and working in a paediatric only ED.  
14  
15  
16  
17 422

18  
19 423 The NFR median score of 70 found in this study compares unfavourably with  
20  
21 424 multiple occupational groups and baseline population data from a large Dutch  
22  
23 425 validation study, [37] where the highest frequency of responses were observed  
24  
25 426 at the lower end of the scale. Previous measurement in shift workers (including  
26  
27 427 hospital nurses) showed significantly lower NFR scores, [13,33] as did studies  
28  
29 428 of heavy goods vehicle drivers and merchant seafarers, all with average NFR  
30  
31 429 scores in the range 36-44. [35,36] Our findings are however congruent with our  
32  
33 430 own feasibility work completed in a single centre UK ED, reporting a median  
34  
35 431 NFR of 81.8 in all staff groups. [21] The impact of rising patient numbers and  
36  
37 432 overcrowding in UK and Ireland EDs is commonly reported, [38,39] but our  
38  
39 433 findings are the first to illustrate the impact of high work demand on physician's  
40  
41 434 need to recuperate from work and the modifiable factors which can mitigate this  
42  
43 435 fatigue.  
44  
45  
46  
47  
48  
49 436

50  
51 437 The three modifiable occupational factors represent areas of autonomy  
52  
53 438 and control, correlating well with previous work establishing these as core  
54  
55 439 drivers to minimise physician workplace stress and ensure well-being. [2,40,41]  
56  
57  
58 440 Prioritising change in these domains may result in NFR score reduction and  
59  
60

1  
2  
3 441 reduce negative effects on health and well-being, including occupational  
4  
5 442 burnout. Whilst out-of-hours working is inherent and unavoidable in EM, the  
6  
7 443 linear relationship we observed suggests that any reduction may result in direct  
8  
9 444 improvements in NFR, and evidence-based strategies such as proportional  
10  
11 445 control of out-of-hours working, annualised rota patterns and/or provision of rest  
12  
13 446 facilities should therefore be considered urgently.[42–44]  
14  
15  
16  
17 447

18  
19 448 As NFR does not change with seniority prior to consultant level, this  
20  
21 449 indicates that factors that could be postulated to influence work stress in  
22  
23 450 postgraduate training such as increased responsibility, management roles and  
24  
25 451 experience, appear to have a limited influence on NFR. It is therefore possible  
26  
27 452 that the reduction in NFR seen in those at consultant level supports the  
28  
29 453 hypothesis that broader perceptions of job autonomy and control, may be  
30  
31 454 explicitly linked to well-being in healthcare.[2,44] This correlates with our finding  
32  
33 455 that poor access to study and annual leave increases NFR, likely to be more  
34  
35 456 accessible at a senior level. Further areas merit exploration including the link to  
36  
37 457 out-of-hours working, influence of night and day shift proportions and possible  
38  
39 458 qualitative enquiry of personal experience and clinical performance.  
40  
41  
42  
43  
44  
45 459

46  
47 460 The relationship observed between gender and NFR is likely to be overly  
48  
49 461 simplistic requiring further evaluation. Presumed confounding variables  
50  
51 462 affecting this issue (such as a primary carer role and domestic responsibilities)  
52  
53 463 have been previously reported to be unrelated or protective against  
54  
55 464 maladaptive fatigue and are supported with findings from this study. [45]  
56  
57  
58  
59  
60

1  
2  
3 465 Awareness of the four demographic factors identified could be important at a  
4  
5 466 departmental planning level and increase advocacy for colleagues at greatest  
6  
7 467 risk of impaired well-being.  
8  
9

10 468

11  
12 469 The main strength of our study is inclusion of responses from over half  
13  
14 470 of all UK EDs, enhancing generalisability of our findings. [24] The high volume  
15  
16 471 of responses indicate the NFR scale as an 11-item survey, is an acceptable  
17  
18 472 measure for physicians, with over half of sites exceeding 70% response rates.  
19  
20 473 A key weakness is the single-point-of-time measurement, as seasonal bias may  
21  
22 474 have affected NFR scores. Furthermore, we acknowledge the disadvantages  
23  
24 475 of self-administered dichotomous questionnaires which may limit the richness  
25  
26 476 of insights.[46,47] Open-ended questions may be desirable in future survey  
27  
28 477 iterations.  
29  
30  
31  
32

33 478

34  
35 479 The straightforward construction and interpretation, ease of  
36  
37 480 administration and completion confers advantages of the NFR scale over more  
38  
39 481 complex well-being inventories allowing for quick assessment of a workforce  
40  
41 482 NFR, especially in a busy clinical environment. Where identified to be high and  
42  
43 483 interventions initiated such as a rota change, the NFR scale can be easily  
44  
45 484 repeated to confirm or refute the impact, and may identify further areas resulting  
46  
47 485 in continual improvement whilst minimising survey respondent fatigue.  
48  
49  
50

51 486

52  
53 487 Future areas of work will include analysis of the NFR findings in  
54  
55 488 relationship to well-being and burnout. Any future work should also include  
56  
57  
58  
59  
60

1  
2  
3 489 other ED staff groups and physician groups to gain a broader picture across  
4  
5 490 the multi-professional team.  
6  
7  
8 491

9  
10 492 In conclusion, this study provides a robust estimate of the NFR for  
11  
12 493 Emergency Physicians in the UK and Ireland, which is higher than any  
13  
14 494 occupation reported to date. Several potentially modifiable occupational  
15  
16 495 characteristics were associated with higher NFR, and future work to assess the  
17  
18 496 impact of modifying these factors will inform strategies to reduce NFR. In time  
19  
20 497 this may lead to improved long-term physician well-being and enhanced staff  
21  
22 498 retention.  
23  
24  
25  
26  
27  
28  
29  
30  
31  
32  
33  
34  
35  
36  
37  
38  
39  
40  
41  
42  
43  
44  
45  
46  
47  
48  
49  
50  
51  
52  
53  
54  
55  
56  
57  
58  
59  
60

1  
2  
3 499 **Funding statement:**  
4

5 500 This project was funded through a grant from the Royal College of Emergency  
6  
7 501 Medicine (RCEM) (Reference number: G/2018/1). This study was independent  
8  
9 502 of RCEM, and the sponsor had no role in the design of this study and no role  
10  
11 503 during its execution, analyses, interpretation of the data, or decision to submit  
12  
13 504 results.  
14  
15  
16

17 505

18  
19 506 **Competing interests:**  
20

21 507 All authors have completed the ICMJE uniform disclosure form and declare: no  
22  
23 508 support from any organisation for the submitted work; TR has received 50%  
24  
25 509 salary funding for two years as the Trainee Emergency Research Network  
26  
27 510 fellow from the Royal College of Emergency Medicine; DH reports an honorary  
28  
29 511 role as the Professor of the Royal College of Emergency Medicine during the  
30  
31 512 conduct of this study; no other relationships or activities that could appear to  
32  
33 513 have influenced the submitted work.  
34  
35  
36

37 514

38  
39 515 **Patient and Public Involvement statement:**  
40

41 516 The concept of the research was presented to over 100 members of the  
42  
43 517 public at a Research & Development PPI Conference on 20<sup>th</sup> September  
44  
45 518 2018. Participants were supportive of the concept of the study, and no  
46  
47 519 concerns were raised. Further public and stakeholder engagement took place  
48  
49 520 through a workshop held at the UK Emergency Medicine Trainees Association  
50  
51 521 Annual Conference in December 2018, this influenced the outcome measures  
52  
53 522 and survey design including the removal of a formal burnout inventory due to  
54  
55  
56  
57  
58  
59  
60

1  
2  
3 523 perceptions and experience of respondent fatigue in the target participant  
4  
5 524 group.

6  
7  
8 525

9  
10 526 **Ethics Approval:**

11  
12 527 This study protocol was submitted through the Integrated Research Application  
13  
14 528 System (IRAS), IRAS number 262048 and received proportionate ethical  
15  
16  
17 529 approval by the Health Research Authority and Health and Care Research  
18  
19 530 Wales, Research Ethics Committee reference 19/HRA/2404 and equivalent  
20  
21 531 approvals in Scotland, Northern Ireland and Ireland. All participants provided  
22  
23  
24 532 informed consent prior to beginning the survey

25  
26 533

27  
28 534 **Data sharing:**

29  
30 535 De-identified participant level data by site will be made available on  
31  
32 536 reasonable request through the study team ([tern@rcem.ac.uk](mailto:tern@rcem.ac.uk)). Data will be  
33  
34 537 available for researchers whose proposed use of the data has been approved  
35  
36  
37 538 by the study team.

38  
39  
40 539

41  
42 540 **Transparency statement:**

43  
44 541 The lead author, Dr Laura Cottey, and the co-authors affirm that this manuscript  
45  
46 542 is an honest, accurate, and transparent account of the study being reported;  
47  
48 543 that no important aspects of the study have been omitted; and that any  
49  
50 544 discrepancies from the study as planned have been explained.

51  
52  
53 545

54  
55  
56 546

57  
58  
59  
60

1  
2  
3 547 **Dissemination to participants and related patient and public**

4  
5 548 **communities:**

6  
7 549 The authors are unable to disseminate the result of the research to study  
8  
9 550 participants directly, but the results will be made publicly available through  
10  
11 551 open access publication and dissemination of the results through site principal  
12  
13 552 investigators and social media.  
14  
15  
16

17 553

18  
19 554 **Acknowledgments:**

20  
21 555 The authors would like to thank the Royal College of Emergency Medicine  
22  
23 556 and University Hospitals Plymouth NHS Trust Research and Development  
24  
25 557 Department for their support with the study. In addition, we like to thank the  
26  
27 558 following individuals for study input: Professor Jason E Smith for providing  
28  
29 559 feedback on study design; Victoria Yates and Dr Chris Rollinson for their  
30  
31 560 support as study sponsorship team; Mark Mills for conducting data analysis  
32  
33 561 for the feasibility work; Dr Ffion Barham for providing assistance with initial  
34  
35 562 data analysis; Professor Marc van Veldhoven for kind permission to use the  
36  
37 563 Need for Recovery scale. Finally, we would like to acknowledge I-TERN, for  
38  
39 564 their invaluable support recruiting patients to the study within Ireland.  
40  
41  
42  
43  
44

45 565

46  
47 566 **Contributors:**

48  
49 567 LC, TR and BG contributed to the development of the study design, data  
50  
51 568 collection and analysis, the first draft of the manuscript and subsequent revised  
52  
53 569 versions. DH and JML contributed to the development of the study design, data  
54  
55 570 analysis, the first draft of the manuscript and subsequent revised versions. MDL  
56  
57 571 contributed to survey development, data collection and final version of  
58  
59  
60



1  
2  
3 572 manuscript; KS and DE provided the statistical analysis plan and contributed to  
4  
5 573 data analysis, the first draft of the manuscript and subsequent revised versions.  
6  
7  
8 574 All authors approved the final version of the manuscript for submission. LC is  
9  
10 575 the guarantor. TERN and PERUKI collaborators contributed to local study  
11  
12 576 promotion and participant recruitment.  
13  
14  
15 577

16  
17 578 **List of Trainee Emergency Research Network and Paediatric Emergency**  
18  
19 579 **Research in the UK and Ireland collaborators**  
20

21 580

22 581 **Site study leads**

23  
24 582 L Kane (Aberdeen Royal Infirmary); S Richter, J Selway (Addenbrooke's  
25  
26 583 Hospital, Cambridge); C Rimmer (Aintree Hospital, Liverpool); M Ayres  
27  
28 584 (Airedale General Hospital, West Yorkshire); C Ponami (Barking, Havering  
29  
30 585 and Redbridge University Hospitals NHS Trust); A Quartermain (Basingstoke  
31  
32 586 and North Hampshire Hospital); K Kaur (Bedford Hospital); S Hartshorn  
33  
34 587 (Birmingham Children's Hospital); K McGregor (Bradford Royal Infirmary); G  
35  
36 588 Gardner (Bristol Royal Hospital for Children), T Clingo (Bristol Royal  
37  
38 589 Infirmary); R Stewart (Chelsea & Westminster Hospital); N Mullen (South  
39  
40 590 Tyneside and Sunderland NHS Foundation Trust); K Mirza (Colchester  
41  
42 591 Hospital); T Hussan (County Durham and Darlington NHS Foundation Trust);  
43  
44 592 P Cuthbert (Craigavon Area Hospital, County Armagh); M Alex (Croydon  
45  
46 593 University Hospital); F Barham (Derriford Hospital, Plymouth), A Bayston  
47  
48 594 (Doncaster and Bassetlaw Hospital NHS Trust); K Veeramuthu (East Surrey  
49  
50 595 Hospital); R Macfarlane (Epsom and St Helier NHS Trust); J Criddle (Evelina  
51  
52 596 London Children's Hospital); G Lipton (Forth Valley Royal Hospital); K New  
53  
54 597 (Frimley Park Hospital); M Jee Poh Hock, Etimbuk Umana (Galway University  
55  
56 598 Hospital, Republic of Ireland); C Ward (Glasgow Royal Infirmary); V Agosti, M  
57  
58 599 Connelly (Gloucestershire Hospitals Foundation Trust); C Weegenaar (Great  
60  
600 Western Hospital, Swindon); J Kerr (Hampshire Hospitals NHS Trust); SJ  
601  
602 601 Dhutia, T Owens (Homerton University Hospital); B Cherian (Hull University  
603  
602 Teaching Hospital); U Basit, D Hartin (Ipswich Hospital); O Williams (James  
Cook University Hospital, Middlesbrough); C Lindsay (James Paget University

1  
2  
3 604 Hospital); F Cattle (King's College Hospital, London); S Manou (Leeds  
4  
5 605 Teaching Hospitals NHS Trust); MH Elwan, C Nunn (Leicester Royal  
6  
7 606 Infirmary); R Fuller (Leighton Hospital, Crewe); S Stevenson (Limerick  
8  
9 607 Regional Hospital, Republic of Ireland); C Reynard (Manchester University  
10  
11 608 NHS Foundation Trust); J Daly (Mater Misericordiae University Hospital,  
12  
13 609 Republic of Ireland); A Da'Costa (Medway Foundation NHS Trust); L How  
14  
15 610 (Milton Keynes Hospital); G Boggaram, D McConnell (Musgrove Park  
16  
17 611 Hospital, Taunton); R Hirst, K Thomas (North Bristol NHS Trust); R Campbell,  
18  
19 612 J Muller, S Taylor (North Middlesex University Hospital); H Chatha (Northern  
20  
21 613 General Hospital, Sheffield); R Grimwood (Northumbria Specialist Emergency  
22  
23 614 Care Hospital); F Fadhilillah (Northwick Park Hospital); S Ojo (Nottingham  
24  
25 615 University Hospitals Trust); A Paul, S Ramsundar (Oxford University  
26  
27 616 Hospital); A Blackwell, DSD Ranasinghe (Queen Alexandra Hospital,  
28  
29 617 Portsmouth); S Hall (Queen Elizabeth Hospital, Woolwich); I Traiforos (Queen  
30  
31 618 Elizabeth University Hospital, Glasgow); E Walton (Royal Alexandra  
32  
33 619 Children's Hospital, Brighton); T Sparkes (Royal Berkshire Hospital); L Barrett  
34  
35 620 (Royal Blackburn Hospital); M Sheikh (Royal Bolton Hospital); J Driessen  
36  
37 621 (Royal Cornwall Hospital); S Meredith, C Newbury (University of Derby and  
38  
39 622 Burton Hospitals Trust); H Grimsmo-Powney, H Malik (Royal Devon and  
40  
41 623 Exeter Hospital); L Gwatkin (Royal Gwent Hospital); R Blackburn, L  
42  
43 624 McKechnie (Royal Hospital for Children, Glasgow); J Browning (Royal  
44  
45 625 Hospital for Sick Children, Edinburgh); F Gillies (Royal Infirmary of  
46  
47 626 Edinburgh); TF McLoughlin (Royal Liverpool University Hospital); SM Rahman  
48  
49 627 (Royal London Hospital); K Hopping (Royal Manchester Children's Hospital);  
50  
51 628 M Broyde (Royal Oldham Hospital); K Challen, M Macdonald (Royal Preston  
52  
53 629 Hospital); A Randle (Royal Shrewsbury Hospital); E Timony-Nolan (Royal  
54  
55 630 Sussex County Hospital, Brighton); H Fairbairn (Royal United Hospital, Bath);  
56  
57 631 G Gracey (Royal Victoria Hospital, Belfast); K Clayton, J Thompson (Royal  
58  
59 632 Victoria Infirmary Hospital, Newcastle); C Kennedy (Salford Royal Hospital); S  
60  
633 Gray (Salisbury NHS Foundation Trust); C Magee (Sandwell General  
634  
635 Hospital, Birmingham); G Hartshorne (Sheffield Children's Hospital); J Foley  
636  
637 (Sligo University Hospital, Republic of Ireland); S Gardner, S Pintus, K Scott  
(Southport & Ormskirk Hospital); K Brammer, A Raghunathan (St Georges  
Hospital, Tooting); S Langston (St Helen's and Knowsley NHS Trust); F Gillies

1  
2  
3 638 (St John's Hospital, Livingston); J Patel (St Marys Hospital, London); A Knight  
4  
5 639 (St Richards Hospital, Chichester); S Saunder, C Thomas (St Thomas'  
6  
7 640 Hospital, London); C Szekeres (Surrey and Sussex NHS Trust); P Fitzpatrick  
8  
9 641 (Temple Street Children's Hospital); L Kehler (The Royal Wolverhampton  
10  
11 642 NHS Trust); H Cooper (Tunbridge Wells Hospital); B O'Hare (Ulster Hospital);  
12  
13 643 A Arumugam, C Leech (University Hospitals Coventry and Warwickshire NHS  
14  
15 644 Trust); Y Moulds, DL Thom (University Hospital Crosshouse); N Ali (University  
16  
17 645 Hospital Lewisham, London); A Mackay (University Hospital Monklands); J  
18  
19 646 Norton (University Hospital of North Midlands); E Frost, R Wright (University  
20  
21 647 Hospital Southampton); CE Davies, A Hanks, E Murray (University Hospital of  
22  
23 648 Wales); A Saunders (Victoria Hospital, Kirkcaldy); KI Malik (West Suffolk  
24  
25 649 Hospital); IMV Asif (West Middlesex Hospital); S Manouchehri (Wexham Park  
26  
27 650 Hospital); A Fatkin, S Lewis (Whiston Hospital); S Naeem (William Harvey  
28  
29 651 Hospital, Ashford); A Basu (Wrexham Maelor Hospital); N Cherian, O Hill  
30  
31 652 (Wythenshawe Hospital, Manchester); C Boulind (Yeovil District Hospital); P  
32  
33 653 Williams (Ysbyty Gwynedd Hospital)  
34  
35 654

### 655 **Data collectors**

36  
37 656  
38  
39 657 S Hardwick, C Gandolfi (Addenbrooke's Hospital, Cambridge); E  
40  
41 658 Everitt (Aintree Hospital, Liverpool); R Hughes (Betsi Cadwaladr University  
42  
43 659 Hospital); E Williams (Bristol Royal Hospital for Children), A Ghosh  
44  
45 660 (Colchester Hospital); G Hampton, D McKeever, D Purdy, L Savage  
46  
47 661 (Craigavon Area Hospital); S Bailey (Derriford Hospital, Plymouth); J Leung  
48  
49 662 (East Kent Hospitals); L Brown, P Harris, R Sharr (East Surrey Hospital); R  
50  
51 663 Loffhagen (Gloucestershire Hospitals Foundation Trust); V Rivers (Ipswich  
52  
53 664 Hospital); HD Khan, K Vincent (Leicester Royal Infirmary), H  
54  
55 665 Baird (Manchester University NHS Foundation Trust); J Foot (Musgrove Park  
56  
57 666 Hospital, Taunton); S Bury, E Grocholski, G Kamalatharan (Northwick Park  
58  
59 667 Hospital); MU Khan (Nottingham University Hospitals Trust); J Gaiawyn  
60  
668 (Royal Cornwall Hospital); G Johnson, A Tabner (University of Derby and  
669  
670 Burton Hospitals Trust); L Abraham (Royal Devon and Exeter Hospital); N  
671  
670 Sexton (Royal Liverpool University Hospital); A Akhtar (Royal Victoria  
Hospital, Belfast); C de Buitleur (Sligo University Hospital, Republic of Ireland);

1  
2  
3 672 B Clarke, M Colmar (St John's Hospital, Livingston); Z Haslam, M Morrison  
4 (Southport & Ormskirk NHS Trust); K Veermuthu (Surrey and Sussex  
5 673 (Southport & Ormskirk NHS Trust); K Veermuthu (Surrey and Sussex  
6 674 Healthcare Trust); D Raffo, J Stafford (Ulster Hospital, Belfast); S McIntock  
7 (University Hospitals Coventry and Warwickshire NHS Trust); R Bond, OR  
8 675 (University Hospitals Coventry and Warwickshire NHS Trust); R Bond, OR  
9 676 Griffiths, B McIlwham (University Hospital Wales); K Cunningham (Victoria  
10 676 Griffiths, B McIlwham (University Hospital Wales); K Cunningham (Victoria  
11 677 Hospital, Kirkcaldy); E Clegg (Wythenshawe Hospital)  
12 677 Hospital, Kirkcaldy); E Clegg (Wythenshawe Hospital)  
13 678  
14 678  
15 679  
16 679  
17 680

## 680 REFERENCES

- 681  
682 1 The King's Fund. The health care workforce in England: Make or  
683 Break? 2018. [https://www.kingsfund.org.uk/publications/health-care-](https://www.kingsfund.org.uk/publications/health-care-workforce-england)  
684 workforce-england (accessed 27 May 2020).  
685 2 UK-wide review of doctors and medical students wellbeing - GMC.  
686 2019. [https://www.gmc-uk.org/about/how-we-work/corporate-strategy-](https://www.gmc-uk.org/about/how-we-work/corporate-strategy-plans-and-impact/supporting-a-profession-under-pressure/uk-wide-review-of-doctors-and-medical-students-wellbeing)  
687 plans-and-impact/supporting-a-profession-under-pressure/uk-wide-  
688 review-of-doctors-and-medical-students-wellbeing (accessed 27 May  
689 2020).  
690 3 Ramirez AJ, Graham J, Richards MA, *et al*. Mental health of hospital  
691 consultants: The effects of stress and satisfaction at work. *Lancet*  
692 1996;347:724–8. doi:10.1016/S0140-6736(96)90077-X  
693 4 Salen P, Norman K. The Impact of Fatigue on Medical Error and  
694 Clinician Wellness: A Vignette-Based Discussion. In: *Vignettes in*  
695 *Patient Safety - Volume 2*. 2018. doi:10.5772/intechopen.70712  
696 5 Arora M, Asha S, Chinnappa J, *et al*. Review article: Burnout in  
697 emergency medicine physicians. *Emerg Med Australas* 2013;25:491–5.  
698 doi:10.1111/1742-6723.12135  
699 6 Han S, Shanafelt TD, Sinsky CA, *et al*. Estimating the attributable cost  
700 of physician burnout in the United States. *Ann Intern Med* Published  
701 Online First: 2019. doi:10.7326/M18-1422  
702 7 Rotenstein LS, Torre M, Ramos MA, *et al*. Prevalence of burnout  
703 among physicians a systematic review. *JAMA* 2018;320:1131–50.  
704 doi:10.1001/jama.2018.12777

- 1  
2  
3 705 8 Shanafelt TD, Hasan O, Dyrbye LN, *et al.* Changes in Burnout and  
4 706 Satisfaction with Work-Life Balance in Physicians and the General US  
5 707 Working Population between 2011 and 2014. *Mayo Clin Proc*  
6 708 2015;**90**:1600–13. doi:10.1016/j.mayocp.2015.08.023  
7  
8 709 9 The Lancet T. Physician burnout: a global crisis. *Lancet* 2019;394:93.  
9 710 doi:10.1016/S0140-6736(19)31573-9  
10  
11 711 10 West CP, Dyrbye LN, Erwin PJ, *et al.* Interventions to prevent and  
12 712 reduce physician burnout: a systematic review and meta-analysis.  
13 713 *Lancet* 2016;388:2272–81. doi:10.1016/S0140-6736(16)31279-X  
14  
15 714 11 Sluiter JK, Van Der Beek AJ, Frings-Dresen MHW. The influence of work  
16 715 characteristics on the need for recovery and experienced health: A  
17 716 study on coach drivers. *Ergonomics* 1999;42:573–83.  
18 717 doi:10.1080/001401399185487  
19  
20 718 12 Jansen NWH, Kant I, Van Amelsvoort LGPM, *et al.* Need for recovery  
21 719 from work: Evaluating short-term effects of working hours, patterns and  
22 720 schedules. *Ergonomics* 2003;46:664–80  
23 721 doi:10.1080/0014013031000085662  
24  
25 722 13 Sluiter JK, De Croon EM, Meijman TF, *et al.* Need for recovery from  
26 723 work related fatigue and its role in the development and prediction of  
27 724 subjective health complaints. *Occup Environ Med* 2003; 60(Suppl 1):  
28 725 i62–i70 doi:10.1136/oem.60.suppl\_1.i62  
29  
30 726 14 Sluiter JK, Frings-Dresen MH, van der Beek AJ, *et al.* The relation  
31 727 between work-induced neuroendocrine reactivity and recovery,  
32 728 subjective need for recovery, and health status. *J Psychosom Res*  
33 729 2001;50:29–37. doi:10.1016/s0022-3999(00)00213-0  
34  
35 730 15 GMC. General Medical Council. National training surveys 2019: Initial  
36 731 findings report. 2019. [https://www.gmc-uk.org/-/media/gmc-site-](https://www.gmc-uk.org/-/media/gmc-site-images/about/national-training-surveys-initial-findings-report-20190705_2.pdf?la=en&hash=8455783A3C4DE2CC55A38ACB9ACF5D0B391744B0)  
37 732 [images/about/national-training-surveys-initial-findings-report-](https://www.gmc-uk.org/-/media/gmc-site-images/about/national-training-surveys-initial-findings-report-20190705_2.pdf?la=en&hash=8455783A3C4DE2CC55A38ACB9ACF5D0B391744B0)  
38 733 [20190705\\_2.pdf?la=en&hash=8455783A3C4DE2CC55A38ACB9ACF5](https://www.gmc-uk.org/-/media/gmc-site-images/about/national-training-surveys-initial-findings-report-20190705_2.pdf?la=en&hash=8455783A3C4DE2CC55A38ACB9ACF5D0B391744B0)  
39 734 [D0B391744B0](https://www.gmc-uk.org/-/media/gmc-site-images/about/national-training-surveys-initial-findings-report-20190705_2.pdf?la=en&hash=8455783A3C4DE2CC55A38ACB9ACF5D0B391744B0) (accessed 27 May 2020).  
40  
41 735 16 Williamson K, Lank PM, Cheema N, *et al.* Comparing the Maslach  
42 736 Burnout Inventory to other well-being instruments in emergency  
43 737 medicine residents. *J Grad Med Educ*  
44 738 2018;10:532–6.

- 1  
2  
3 739 17 Boutou A, Pitsiou G, Sourla E, Kioumis I. Burnout syndrome among  
4 740 emergency medicine physicians: an update on its prevalence and risk  
5 741 factors. *Eur Rev Med Pharmacol Sci* 2019 Oct;23:9058-65.
- 6  
7  
8 742 18 Panagioti M, Panagopoulou E, Bower P, *et al*. Controlled interventions  
9 743 to reduce burnout in physicians a systematic review and meta-analysis.  
10 744 *JAMA Intern Med* 2017;177:195–205.  
11  
12 745 doi:10.1001/jamainternmed.2016.7674
- 13  
14  
15 746 19 Dewa CS, Jacobs P, Thanh NX, *et al*. An estimate of the cost of burnout  
16 747 on early retirement and reduction in clinical hours of practicing  
17 748 physicians in Canada. *BMC Health Serv Res* 2014;14.  
18  
19 749 doi:10.1186/1472-6963-14-254
- 20  
21  
22 750 20 National Academies of Sciences E and M. *Taking Action Against*  
23 751 *Clinician Burnout*. Washington, D.C. National Academies Press 2019.  
24  
25 752 doi:10.17226/25521
- 26  
27  
28 753 21 Graham B, Cottey L, Smith JE, *et al* Measuring ‘Need for Recovery’ as  
29 754 an indicator of staff well-being in the emergency department: a survey  
30 755 study. *Emerg Med J* Published Online First:  
31 756 2020. doi: 10.1136/emered-2019-208797
- 32  
33  
34 757 22 Smith J, Keating L, Flowerdew L on behalf of the JLA EM PSP Steering  
35 758 Group, *et al* An Emergency Medicine Research Priority Setting  
36 759 Partnership to establish the top 10 research priorities in emergency  
37 760 medicine. *Emerg Med J* 2017;34:454-456.
- 38  
39  
40 761 23 Eysenbach G. Improving the Quality of Web Surveys: The Checklist for  
41 762 Reporting Results of Internet E-Surveys (CHERRIES). *J Med Internet*  
42 763 *Res* 2004;6:e34. doi:10.2196/jmir.6.3.e34
- 43  
44  
45 764 24 Medicine RC of E. Essential Facts Regarding A&E Services.  
46 765 2018.<https://www.rcem.ac.uk/docs/Policy/England Factsheet 2018.pdf>  
47 766 (accessed 27 May 2020).
- 48  
49  
50 767 25 Cottey L, Vassallo J, Roberts T, Horner D, Tabner A. About TERN? -  
51 768 RCEMLearning. <https://www.rcemlearning.co.uk/foamed/about-tern/>  
52 769 (accessed 27 May 2020)
- 53  
54  
55 770 26 Lyttle MD, O’Sullivan R, Hartshorn S, *et al*. Pediatric Emergency  
56 771 Research in the UK and Ireland (PERUKI): Developing a collaborative  
57 772 for multicentre research. *Arch Dis Child* 2014;99:602–3.

- 1  
2  
3 773 doi:10.1136/archdischild-2013-304998  
4  
5 774 27 Van Veldhoven M, Meijman TF. *Het meten van psychosociale*  
6  
7 775 *arbeidsbelasting met een vragenlijst: De Vragenlijst Beleving en*  
8  
9 776 *Beoordeling van de Arbeid (VBBA). [Questionnaire on Perception and*  
10  
11 777 *Judgement of Work]*. 1994.  
12  
13 778 28 Van Veldhoven M, Broersen S. Measurement quality and validity of the  
14  
15 779 “need for recovery scale”. *Occup Environ Med* 2003;**60**:i3-i9.  
16  
17 780 doi:10.1136/oem.60.suppl\_1.i3  
18  
19 781 29 Harris PA, Taylor R, Minor BL, *et al*. The REDCap consortium: Building  
20  
21 782 an international community of software platform partners. *J Biomed*  
22  
23 783 *Inform* 2019;**95**:103208. doi:10.1016/J.JBI.2019.103208  
24  
25 784 30 Harris PA, Taylor R, Thielke R, *et al*. Research electronic data capture  
26  
27 785 (REDCap)—A metadata-driven methodology and workflow process for  
28  
29 786 providing translational research informatics support. *J Biomed Inform*  
30  
31 787 2009;**42**:377–81. doi:10.1016/J.JBI.2008.08.010  
32  
33 788 31 StataCorp. Stata Statistical Software: Release 14. College Station, TX:  
34  
35 789 StataCorp LP. 2015. 2015. doi:10.2307/2234838  
36  
37 790 32 Van Der Starre RE, Coffeng JK, Hendriksen IJ, *et al*. Associations  
38  
39 791 between overweight, obesity, health measures and need for recovery in  
40  
41 792 office employees: A cross-sectional analysis. *BMC Public Health*  
42  
43 793 Published Online First: 2013. doi:10.1186/1471-2458-13-1207  
44  
45 794 33 Moriguchi CS, Trevizani T, De Fátima Carreira Moreira R, *et al*. Need  
46  
47 795 for recovery assessment among nursing professionals and call center  
48  
49 796 operators. In: *Work*. 2012. 4838–42. doi:10.3233/WOR-2012-0773-4838  
50  
51 797 34 Samadi H, Kalantari R, Mostafavi F, *et al*. Using the Need for Recovery  
52  
53 798 Scale to Assess Workload in Mine Workers and Its Relationship With  
54  
55 799 Demographics. *J Ergon* 2017;**4**:1–7. doi:10.21859/joe-04041  
56  
57 800 35 Bridger RS, Brasher K, Dew A. Work demands and need for recovery  
58  
59 801 from work in ageing seafarers. *Ergonomics* 2010;**53**:1006–15.  
60  
802 doi:10.1080/00140139.2010.493958  
803 36 De Croon EM, Sluiter JK, Frings-Dresen MHW. Need for recovery after  
804  
805 work predicts sickness absence: A 2-year prospective cohort study in  
806  
806 3999(02)00630-X

- 1  
2  
3 807 37 Jansen NWH, Kant IJ, van den Brandt PA. Need for recovery in the  
4  
5 808 working population: description and associations with fatigue and  
6  
7 809 psychological distress. *Int J Behav Med* 2002;9:322–40.  
8  
9 810 38 Hassan T, Walker B, Harrison M, *et al.*  
10 811 [www.rcem.ac.uk/docs/Policy/CEM7461-Stretched-to-the-limit-](http://www.rcem.ac.uk/docs/Policy/CEM7461-Stretched-to-the-limit-October_2013.pdf)  
11 812 [October\\_2013.pdf](http://www.rcem.ac.uk/docs/Policy/CEM7461-Stretched-to-the-limit-October_2013.pdf). 2013.[www.rcem.ac.uk/docs/Policy/CEM7461-](http://www.rcem.ac.uk/docs/Policy/CEM7461-Stretched-to-the-limit-October_2013.pdf)  
12 813 [Stretched-to-the-limit-October\\_2013.pdf](http://www.rcem.ac.uk/docs/Policy/CEM7461-Stretched-to-the-limit-October_2013.pdf) (accessed 27 Ma7 2020).  
13  
14  
15 814 39 The Royal College of Emergency Medicine. Improving safety in the  
16 815 Emergency Department this winter: a guide for health service leaders  
17 816 and boards. 2018.  
18  
19  
20 817 [https://www.rcem.ac.uk/RCEM/Quality\\_Policy/Policy/Winter\\_Planning/R](https://www.rcem.ac.uk/RCEM/Quality_Policy/Policy/Winter_Planning/RCEM/Quality-Policy/Policy/Winter_Planning.aspx?hkey=e37845aa-c9a5-4b01-aa72-48137cc59aa1)  
21 818 [CEM/Quality-Policy/Policy/Winter\\_Planning.aspx?hkey=e37845aa-](https://www.rcem.ac.uk/RCEM/Quality_Policy/Policy/Winter_Planning.aspx?hkey=e37845aa-c9a5-4b01-aa72-48137cc59aa1)  
22 819 [c9a5-4b01-aa72-48137cc59aa1](https://www.rcem.ac.uk/RCEM/Quality_Policy/Policy/Winter_Planning.aspx?hkey=e37845aa-c9a5-4b01-aa72-48137cc59aa1) (accessed 23 July 2020)  
23  
24  
25 820 40 Hall LH, Johnson J, Heyhoe J, *et al.* Strategies to improve general  
26 821 practitioner well-being: Findings from a focus group study. *Fam Pract*  
27 822 Published Online First: 2018. doi:10.1093/fampra/cmz130  
28  
29  
30 823 41 Galletta M, Portoghese I, Fabbri D, *et al.* Empowering workplace and  
31 824 wellbeing among healthcare professionals: The buffering role of job  
32 825 control. *Acta Biomed* 2016;87:61–9.  
33  
34  
35 826 42 NHS Improvement. Annualised hours rotas for emergency department  
36 827 doctors. 2019.  
37  
38  
39 828 [https://improvement.nhs.uk/documents/5919/Brighton\\_\\_Sussex\\_-](https://improvement.nhs.uk/documents/5919/Brighton__Sussex_-_annualised_hours_rotas.pdf)  
40 829 [\\_annualised\\_hours\\_rotas.pdf](https://improvement.nhs.uk/documents/5919/Brighton__Sussex_-_annualised_hours_rotas.pdf) (accessed 27 May 2020).  
41  
42  
43 830 43 Rimmer A. Government commits £10m to doctors' rest facilities. *BMJ*  
44 831 2233 doi: <http://doi.org/10.1136/bmj.l2233>  
45  
46 832 44 Smith E, Dasan S. A system under pressure. *Br J Hosp Med*  
47 833 2018;79:495–9. doi:10.12968/hmed.2018.79.9.495  
48  
49  
50 834 45 Winwood PC, Winefield AH, Lushington K. Work-related fatigue and  
51 835 recovery: The contribution of age, domestic responsibilities and  
52 836 shiftwork. *J Adv Nurs* 2006;56:438–49. doi:10.1111/j.1365-53 837 2648.2006.04011.x  
54  
55  
56 838 46 Dykema J, Jones NR, Piché T, *et al.* Surveying Clinicians by Web:  
57 839 Current Issues in Design and Administration. *Eval Heal Prof* Published  
58  
59  
60 840 Online First: 2013;36:352-81. doi:10.1177/0163278713496630



841 47 Klabunde CN, Willis GB, McLeod CC, *et al.* Improving the Quality of  
 842 Surveys of Physicians and Medical Groups: A Research Agenda. *Eval*  
 843 *Heal Prof* 2012;35:477-506 doi:10.1177/0163278712458283

844

845

846

847 Research Checklist: The Checklist for Reporting Results of Internet E-Surveys  
 848 (CHERRIES)

849

| <b>CHERRIES CHECKLIST ADAPTED FROM:</b>                                                                                                                                                                                            |                                  |                                                                                                                                                                                                                      |                                                                      |
|------------------------------------------------------------------------------------------------------------------------------------------------------------------------------------------------------------------------------------|----------------------------------|----------------------------------------------------------------------------------------------------------------------------------------------------------------------------------------------------------------------|----------------------------------------------------------------------|
| Eysenbach, Gunther. "Improving the quality of Web surveys: the Checklist for Reporting Results of Internet E-Surveys (CHERRIES)." <i>Journal of medical Internet research</i> vol. 6,3 e34. 29 Sep. 2004, doi:10.2196/jmir.6.3.e34 |                                  |                                                                                                                                                                                                                      |                                                                      |
| <b>Item Category</b>                                                                                                                                                                                                               | <b>Checklist Item</b>            | <b>Explanation</b>                                                                                                                                                                                                   | <b>Checklist Response</b>                                            |
| <b>Design</b>                                                                                                                                                                                                                      | Describe survey design           | Describe target population, sample frame. Is the sample a convenience sample? (In "open" surveys this is most likely.)                                                                                               | <b>Outlined in 'Methods'</b>                                         |
| <b>IRB (Institutional Review Board) approval and informed consent process</b>                                                                                                                                                      | IRB approval                     | Mention whether the study has been approved by an IRB.                                                                                                                                                               | <b>Outlined in 'Ethics Approval'</b>                                 |
|                                                                                                                                                                                                                                    | Informed consent                 | Describe the informed consent process. Where were the participants told the length of time of the survey, which data were stored and where and for how long, who the investigator was, and the purpose of the study? | <b>Outlined in Survey Distribution, monitoring and recruitment</b>   |
|                                                                                                                                                                                                                                    | Data protection                  | If any personal information was collected or stored, describe what mechanisms were used to protect unauthorized access.                                                                                              | <b>Outlined in Survey Distribution, monitoring and recruitment</b>   |
| <b>Development and pre-testing</b>                                                                                                                                                                                                 | Development and testing          | State how the survey was developed, including whether the usability and technical functionality of the electronic questionnaire had been tested before fielding the questionnaire.                                   | <b>Outlined in 'Survey Development'</b>                              |
| <b>Recruitment process and description of the sample having access to the questionnaire</b>                                                                                                                                        | Open survey versus closed survey | An "open survey" is a survey open for each visitor of a site, while a closed survey is only open to a sample which the investigator knows (password-protected survey).                                               | <b>Outlined in Survey Distribution, monitoring and recruitment</b>   |
|                                                                                                                                                                                                                                    | Contact mode                     | Indicate whether or not the initial contact with the potential participants was made on the Internet. (Investigators may also send out                                                                               | <b>Outlined in 'Survey Distribution, monitoring and recruitment'</b> |

|                              |                                          |                                                                                                                                                                                                                                                                                                                                                                                                                                              |                                                                      |
|------------------------------|------------------------------------------|----------------------------------------------------------------------------------------------------------------------------------------------------------------------------------------------------------------------------------------------------------------------------------------------------------------------------------------------------------------------------------------------------------------------------------------------|----------------------------------------------------------------------|
|                              |                                          | questionnaires by mail and allow for Web-based data entry.)                                                                                                                                                                                                                                                                                                                                                                                  |                                                                      |
|                              | Advertising the survey                   | How/where was the survey announced or advertised? Some examples are offline media (newspapers), or online (mailing lists – If yes, which ones?) or banner ads (Where were these banner ads posted and what did they look like?). It is important to know the wording of the announcement as it will heavily influence who chooses to participate. Ideally the survey announcement should be published as an appendix.                        | <b>Outlined in 'Survey Distribution, monitoring and recruitment'</b> |
| <b>Survey administration</b> | Web/E-mail                               | State the type of e-survey (eg, one posted on a Web site, or one sent out through e-mail). If it is an e-mail survey, were the responses entered manually into a database, or was there an automatic method for capturing responses?                                                                                                                                                                                                         | <b>Outlined in 'Survey Distribution, monitoring and recruitment'</b> |
|                              | Context                                  | Describe the Web site (for mailing list/newsgroup) in which the survey was posted. What is the Web site about, who is visiting it, what are visitors normally looking for? Discuss to what degree the content of the Web site could pre-select the sample or influence the results. For example, a survey about vaccination on a anti-immunization Web site will have different results from a Web survey conducted on a government Web site | <b>Outlined in 'Design'</b>                                          |
|                              | Mandatory/voluntary                      | Was it a mandatory survey to be filled in by every visitor who wanted to enter the Web site, or was it a voluntary survey?                                                                                                                                                                                                                                                                                                                   | <b>Outlined in 'Survey Distribution, monitoring and recruitment'</b> |
|                              | Incentives                               | Were any incentives offered (eg, monetary, prizes, or non-monetary incentives such as an offer to provide the survey results)?                                                                                                                                                                                                                                                                                                               | <b>No</b>                                                            |
|                              | Time/Date                                | In what timeframe were the data collected?                                                                                                                                                                                                                                                                                                                                                                                                   | <b>Outlined in 'Sites and settings'</b>                              |
|                              | Randomization of items or questionnaires | To prevent biases items can be randomized or alternated.                                                                                                                                                                                                                                                                                                                                                                                     | <b>Not done</b>                                                      |
|                              | Adaptive questioning                     | Use adaptive questioning (certain items, or only conditionally displayed based on responses to other items) to reduce number and complexity of the questions                                                                                                                                                                                                                                                                                 | <b>Outlined in Survey Distribution, monitoring and recruitment</b>   |
|                              | Number of Items                          | What was the number of questionnaire items per page? The number of items is an important factor for the completion rate.                                                                                                                                                                                                                                                                                                                     | <b>Outlined in 'Design'</b>                                          |

|                            |                                                                                                           |                                                                                                                                                                                                                                                                                                                                                                                                                                                                                                                                |                                                                    |
|----------------------------|-----------------------------------------------------------------------------------------------------------|--------------------------------------------------------------------------------------------------------------------------------------------------------------------------------------------------------------------------------------------------------------------------------------------------------------------------------------------------------------------------------------------------------------------------------------------------------------------------------------------------------------------------------|--------------------------------------------------------------------|
|                            | Number of screens (pages)                                                                                 | Over how many pages was the questionnaire distributed? The number of items is an important factor for the completion rate.                                                                                                                                                                                                                                                                                                                                                                                                     | <b>Outlined in 'Design'</b>                                        |
|                            | Completeness check                                                                                        | It is technically possible to do consistency or completeness checks before the questionnaire is submitted. Was this done, and if "yes", how (usually JavaScript)? An alternative is to check for completeness after the questionnaire has been submitted (and highlight mandatory items). If this has been done, it should be reported. All items should provide a non-response option such as "not applicable" or "rather not say", and selection of one response option should be enforced.                                  | <b>Not done</b>                                                    |
|                            | Review step                                                                                               | State whether respondents were able to review and change their answers (eg, through a Back button or a Review step which displays a summary of the responses and asks the respondents if they are correct).                                                                                                                                                                                                                                                                                                                    | <b>Outlined in Survey Distribution, monitoring and recruitment</b> |
| <b>Response rates</b>      |                                                                                                           |                                                                                                                                                                                                                                                                                                                                                                                                                                                                                                                                |                                                                    |
|                            | Unique site visitor                                                                                       | If you provide view rates or participation rates, you need to define how you determined a unique visitor. There are different techniques available, based on IP addresses or cookies or both.                                                                                                                                                                                                                                                                                                                                  | <b>Outlined in 'Results'</b>                                       |
|                            | View rate (Ratio of unique survey visitors/unique site visitors)                                          | Requires counting unique visitors to the first page of the survey, divided by the number of unique site visitors (not page views!). It is not unusual to have view rates of less than 0.1 % if the survey is voluntary                                                                                                                                                                                                                                                                                                         | <b>Survey site contains first page of survey therefore N/A</b>     |
|                            | Participation rate (Ratio of unique visitors who agreed to participate/unique first survey page visitors) | Count the unique number of people who filled in the first survey page (or agreed to participate, for example by checking a checkbox), divided by visitors who visit the first page of the survey (or the informed consents page, if present). This can also be called "recruitment" rate.                                                                                                                                                                                                                                      | <b>Outlined in 'Results'</b>                                       |
|                            | Completion rate (Ratio of users who finished the survey/users who agreed to participate)                  | The number of people submitting the last questionnaire page, divided by the number of people who agreed to participate (or submitted the first survey page). This is only relevant if there is a separate "informed consent" page or if the survey goes over several pages. This is a measure for attrition. Note that "completion" can involve leaving questionnaire items blank. This is not a measure for how completely questionnaires were filled in. (If you need a measure for this, use the word "completeness rate".) | <b>Outlined in 'Results'</b>                                       |
| <b>Preventing multiple</b> | Cookies used                                                                                              | Indicate whether cookies were used to assign a unique user identifier to each                                                                                                                                                                                                                                                                                                                                                                                                                                                  | <b>Not used</b>                                                    |

|                                                |                                                            |                                                                                                                                                                                                                                                                                                                                                                                                                                                                                                                                                                                   |                                                                                            |
|------------------------------------------------|------------------------------------------------------------|-----------------------------------------------------------------------------------------------------------------------------------------------------------------------------------------------------------------------------------------------------------------------------------------------------------------------------------------------------------------------------------------------------------------------------------------------------------------------------------------------------------------------------------------------------------------------------------|--------------------------------------------------------------------------------------------|
| <p><b>entries from the same individual</b></p> |                                                            | <p>client computer. If so, mention the page on which the cookie was set and read, and how long the cookie was valid. Were duplicate entries avoided by preventing users access to the survey twice; or were duplicate database entries having the same user ID eliminated before analysis? In the latter case, which entries were kept for analysis (eg, the first entry or the most recent)?</p>                                                                                                                                                                                 |                                                                                            |
|                                                | <p>IP check</p>                                            | <p>Indicate whether the IP address of the client computer was used to identify potential duplicate entries from the same user. If so, mention the period of time for which no two entries from the same IP address were allowed (eg, 24 hours). Were duplicate entries avoided by preventing users with the same IP address access to the survey twice; or were duplicate database entries having the same IP address within a given period of time eliminated before analysis? If the latter, which entries were kept for analysis (eg, the first entry or the most recent)?</p> | <p><b>Not used due to survey being completed on multi-user/single log-in computers</b></p> |
|                                                | <p>Log file analysis</p>                                   | <p>Indicate whether other techniques to analyze the log file for identification of multiple entries were used. If so, please describe.</p>                                                                                                                                                                                                                                                                                                                                                                                                                                        | <p><b>Not done</b></p>                                                                     |
|                                                | <p>Registration</p>                                        | <p>In “closed” (non-open) surveys, users need to login first and it is easier to prevent duplicate entries from the same user. Describe how this was done. For example, was the survey never displayed a second time once the user had filled it in, or was the username stored together with the survey results and later eliminated? If the latter, which entries were kept for analysis (eg, the first entry or the most recent)?</p>                                                                                                                                          | <p><b>N/A</b></p>                                                                          |
| <p><b>Analysis</b></p>                         | <p>Handling of incomplete questionnaires</p>               | <p>Were only completed questionnaires analyzed? Were questionnaires which terminated early (where, for example, users did not go through all questionnaire pages) also analyzed?</p>                                                                                                                                                                                                                                                                                                                                                                                              | <p><b>Outlined in ‘Data Analysis’</b></p>                                                  |
|                                                | <p>Questionnaires submitted with an atypical timestamp</p> | <p>Some investigators may measure the time people needed to fill in a questionnaire and exclude questionnaires that were submitted too soon. Specify the timeframe that was used as a cut-off point, and describe how this point was determined</p>                                                                                                                                                                                                                                                                                                                               | <p><b>N/A</b></p>                                                                          |
|                                                | <p>Statistical correction</p>                              | <p>Indicate whether any methods such as weighting of items or propensity scores have been used to adjust for the non-</p>                                                                                                                                                                                                                                                                                                                                                                                                                                                         | <p><b>Outlined in ‘Data Analysis’</b></p>                                                  |

|  |  |                                                            |  |
|--|--|------------------------------------------------------------|--|
|  |  | representative sample; if so, please describe the methods. |  |
|--|--|------------------------------------------------------------|--|

850

851

852

853

854

855

856

857

858

859

## Figure Legend

860

861

### Figure 1

862

Box plots of Need for Recovery (NFR) score by participant demographic characteristics, excluding any participants who does not respond to the question (i.e. missing).

864

865

Plot a) age group in years; b) gender; c) clinical grade; d) any long-term health condition or disability.

866

867

868

ST1-ST2=Specialist Training year 1-2 (this included physicians training in

869

Anaesthetics, Emergency Medicine, Acute Medicine and General Practice)

870

SASG=Staff grade, associate specialist and speciality grade

871

GP=General Practitioner working within the emergency department (ED)

872

873

### Figure 2

874

Box plot of Need for Recovery (NFR) score by participant's occupational

875

characteristics, excluding any participants who does not respond to the

876

question (i.e. missing).

877

Plot a) ability to obtain study leave when requested; b) ability to obtain annual

878

leave when requested; c) proportion of time working out-of-hours; d) working

879

in paediatrics emergency departments (ED) only.

880

1  
2  
3  
4  
5  
6  
7  
8  
9  
10  
11  
12  
13  
14  
15  
16  
17  
18  
19  
20  
21  
22  
23  
24  
25  
26  
27  
28  
29  
30  
31  
32  
33  
34  
35  
36  
37  
38  
39  
40  
41  
42  
43  
44  
45  
46  
47  
48  
49  
50  
51  
52  
53  
54  
55  
56  
57  
58  
59  
60



Review only

1  
2  
3  
4  
5  
6  
7  
8  
9  
10  
11  
12  
13  
14  
15  
16  
17  
18  
19  
20  
21  
22  
23  
24  
25  
26  
27  
28  
29  
30  
31  
32  
33  
34  
35  
36  
37  
38  
39  
40  
41  
42  
43  
44  
45  
46  
47  
48  
49  
50  
51  
52  
53  
54  
55  
56  
57  
58  
59  
60



Review only

1  
2  
3  
4  
5  
6  
7  
8  
9  
10  
11  
12  
13  
14  
15  
16  
17  
18  
19  
20  
21  
22  
23  
24  
25  
26  
27  
28  
29  
30  
31  
32  
33  
34  
35  
36  
37  
38  
39  
40  
41  
42  
43  
44  
45  
46  
47  
48  
49  
50  
51  
52  
53  
54  
55  
56  
57  
58  
59  
60





# Emergency Department Need For Recovery Survey

1  
2  
3  
4  
5  
6  
7  
8  
9  
10  
11  
12  
13  
14  
15  
16  
17  
18  
19  
20  
21  
22  
23  
24  
25  
26  
27  
28  
29  
30  
31  
32  
33  
34  
35  
36  
37  
38  
39  
40  
41  
42  
43  
44  
45  
46  
47  
48  
49  
50  
51  
52  
53  
54  
55  
56  
57  
58  
59  
60

---

Do you want to read the patient participation leaflet, GDPR and consent information now?

- Yes
- No

For peer review only

---

1 Participant Information Sheet

2  
3 Welcome to the 2019 TERN Need for Recovery Survey.

---

4  
5 This is an electronic participant information sheet.  
6 Please take a minute or two to read this information  
7 before proceeding with the survey.

8  
9 What is need for recovery?

10 Need for recovery is the time taken to physically and  
11 psychologically recover from work. Increased need  
12 for recovery is linked to fatigue and a range of  
13 physical and psychological health outcomes including  
14 burnout.

15 Why have I been asked to take part?

16 You are either:

- 17 • A doctor working in an emergency department which  
18 has been nominated to participate in this survey.

19 What is the purpose of the study?

20 This survey is being conducted as part of a national  
21 survey by the Trainee Emergency Research Network  
22 (TERN). The project is being led by Dr Laura Cottey  
23 (Chief Investigator) and Dr Blair Graham, with  
24 oversight from the TERN executive committee. We hope  
25 that the results from this survey will provide a  
26 baseline assessment of trainee need for recovery,  
27 and demonstrate risk factors that may indicate an  
28 increased need for recovery. It is hoped that this  
29 survey will provide insight into the phenomenon of  
30 need for recovery amongst Emergency Department  
31 doctors, show where differences exist, and how need  
32 for recovery may be reduced in the future.  
33 Ultimately it is hoped that this survey may lead to  
34 initiatives to improve the working lives of doctors  
35 in the emergency department.

36 What will happen if I take part?

37 You will be asked to take part in this electronic  
38 questionnaire. You should allocate about 5 minutes  
39 to complete the questionnaire, although you can save  
40 and return to completing the questionnaire at a  
41 later time.

42  
43 Do I have to take part?

44 In order that these results can inform future  
45 initiatives to improve working lives of emergency  
46 doctors, we do require a robust response rate.  
47 However, you are under no obligation to take part  
48 and may withdraw at any point without the need to  
49 give a reason.

50 Should you have uncertainties or queries about this  
51 survey, please do not hesitate to contact the study  
52 team.

53  
54 What will happen to my data if I withdraw my  
55 involvement?

56 If you choose to withdraw your involvement in the  
57 study, any results that you have submitted will be  
58 kept for analysis. However, you will not be required  
59 to input further into the study.

60 If you would like to be formally withdrawn from the  
study at any point, please contact the study team  
(TERN@rcem.ac.uk). You do not have to give a reason.

For peer review only - <http://bmjopen.bmj.com/site/about/guidelines.xhtml>

Are there any potential risks or benefits of taking

This survey will provide valuable insight into the wellbeing of emergency department doctors nationally. We appreciate issues such as wellbeing and burnout are sensitive. We have included some information about sources that you might wish to contact for support both as part of this introduction, and at the end of the survey.

Who is involved in this project?

The project is being led by Dr Laura Cottey (Chief Investigator) and Dr Blair Graham, with oversight from the TERN executive committee which is led by Dr Tom Roberts. The study is indirectly supported by the Royal College of Emergency Medicine, but TERN is independent from the college.

What if something goes wrong?

It is very unlikely that anything will go wrong. If you feel it does, please contact the study team directly.

How will you protect my data and confidentiality?

The University Hospitals Plymouth NHS Trust is the sponsor for this study. The sponsor will be using information in order to undertake the study and will be responsible for looking after your information and using it properly. The data collected will be kept for 10 years after the study has finished.

Your rights to access, change or move your information are limited, as we need to manage your information in specific ways in order for the research to be reliable and accurate. If you withdraw from the study, we will keep the information about you that we have already obtained. To safeguard your rights, we will use the minimum personally identifiable information possible.

This study is also compliant with the General Data Protection Regulations (GDPR). For more information about GDPR click here.

How may I contact the study team in the future?

You can contact the study team by emailing Dr Laura Cottey at [laura.cottey@nhs.net](mailto:laura.cottey@nhs.net)

What to do if you need support about wellbeing

The following organisations can help provide advice and support with regards to your wellbeing.

-Your occupational health department (contact details available via your employer)

-Your general practitioner

-BMA Counselling Service (24 Hours). Telephone 0330 123 1245. (Note that you do not have to be a member of the BMA to access this service)

-The Samaritans (24 Hours). Telephone 116 123.

You can also access further information and signposting online via the Doctors Support Network <https://www.dsn.org.uk/>

Feel free to leave any comments.

1  
2  
3  
4  
5  
6  
7  
8  
9  
10  
11  
12  
13  
14  
15  
16  
17  
18  
19  
20  
21  
22  
23  
24  
25  
26  
27  
28  
29  
30  
31  
32  
33  
34  
35  
36  
37  
38  
39  
40  
41  
42  
43  
44  
45  
46  
47  
48  
49  
50  
51  
52  
53  
54  
55  
56  
57  
58  
59  
60

---

Consent Question 1:  Yes  
I have read and understood the participant information  No

---

Consent Question 2:  Yes  
I understand the information about confidentiality and GDPR  No

For peer review only

**Demographic Characteristics**

What is your current job role?

- ST1  
 ST2  
 ST3  
 ST4  
 ST5  
 ST6  
 ST7  
 ST8  
 F1  
 F2  
 Clinical Fellow (F2-ST3 Level)  
 Clinical Fellow (>=ST4 Level)  
 Consultant  
 Associate Specialist  
 Staff Grade  
 CESR Doctor  
 GP Trainee  
 GP  
 Other (please specify)

What is your job role?

\_\_\_\_\_

Which country do you work in?

- Scotland  
 Northern Ireland  
 Wales  
 England  
 Republic of Ireland

Which hospital do you currently work in?

- Aberdeen  
 Victoria Hospital, Kirkcaldy  
 Forth Valley Royal Hospital  
 Monklands Hospital  
 Royal Hospital for Children, Glasgow  
 Royal Infirmary of Edinburgh  
 St John's, Livingston  
 NHS Greater Glasgow and Clyde - Queen Elizabeth  
 NHS Greater Glasgow and Clyde - Glasgow Royal Infirmary  
 Crosshouse, Ayrshire  
 Royal Alexandra, Paisley  
 Ayr  
 Royal Hospital for Sick Children, Edinburgh  
 Other

Which hospital do you currently work in?

- Craigavon Area Hospital, Northern Ireland  
 Royal Victoria Hospital, Belfast  
 Ulster Hospital, Belfast  
 Other

1 Which hospital do you currently work in?  
2

- 3  Cardiff, University Hospital of Wales
- 4  Ysbyty Gwynedd, Bangor
- 5  Morriston Hospital, Swansea
- 6  Wrexham, North Wales
- 7  Other
- 8
- 9
- 10
- 11
- 12
- 13
- 14
- 15
- 16
- 17
- 18
- 19
- 20
- 21
- 22
- 23
- 24
- 25
- 26
- 27
- 28
- 29
- 30
- 31
- 32
- 33
- 34
- 35
- 36
- 37
- 38
- 39
- 40
- 41
- 42
- 43
- 44
- 45
- 46
- 47
- 48
- 49
- 50
- 51
- 52
- 53
- 54
- 55
- 56
- 57
- 58
- 59
- 60

For peer review only

1 Which hospital do you currently work in (the list is mostly alphabetically but if you cannot find your hospital please  
2 check the bottom)?  
3

- 4  Addenbrooke's Hospital  
5  Aintree  
6  Airedale General Hospital  
7  Basingstoke Emergency Department  
8  Bedford hospital emergency department  
9  Birmingham  
10  Bolton  
11  Bradford Royal Infirmary  
12  Brighton (Royal Sussex County Hospital)  
13  Bristol Childrens Hospital  
14  Bristol Royal Infirmary (Adults)  
15  Cambridge University Hospitals  
16  Chelsea & Westminster Hospital  
17  Croydon University Hospital  
18  Doncaster Royal Infirmary  
19  William Harvey ED  
20  East Surrey Hospital ED  
21  Epsom and St Helier NHS Trust  
22  Gloucestershire Hospitals NHS Foundation Trust  
23  Great Western Hospital Swindon  
24  Hampshire Hospitals NHS Trust (Basingstoke and Winchester)  
25  Harrogate Emergency Department  
26  Homerton Emergency Department  
27  Ipswich Hospital  
28  James Cook University Hospital Middlesbrough  
29  James Paget University Hospital  
30  Leeds teaching hospitals  
31  Leicester Royal Infirmary  
32  Leighton (Crewe)  
33  Lewisham university hospital  
34  Lister Hospital  
35  QEH, London  
36  Manchester Royal Infirmary  
37  Milton Keynes University  
38  Musgrove Park Hospital, Taunton  
39  Northern general hospital  
40  Northumbria Specialist Emergency Care Hospital  
41  Northwick Park Hospital  
42  Oxford University Hospital NHS Foundation Trust/  
43  Portsmouth - Queen Alexandra Hospital,  
44  Plymouth- Derriford  
45  Reading  
46  Royal Berkshire Hospital  
47  Royal Blackburn Hospital  
48  Royal Cornwall Hospital, Truro  
49  Royal Devon & Exeter Hospital  
50  Royal Liverpool University Hospital  
51  The Royal London Hospital (Paeds)  
52  The Royal London Hospital (Adults)  
53  Royal Manchester Children's Hospital  
54  Royal Oldham Hospital  
55  Royal Preston hospital  
56  Royal Shrewsbury Hospital  
57  Royal Stoke  
58  Royal Surrey County Hospital  
59  Royal United Hospital Bath  
60  Royal Victoria, Newcastle  
 Salford Royal Hospital, Manchester  
 Sheffield Childrens Hospital ED  
 Medway Foundation NHS Trust  
 Mid Cheshire Hospitals NHS Foundation Trust  
 University Hospital Southampton  
 St Helens and Knowsley  
 Southmead Hospital  
 Surrey and Sussex Healthcare NHS Trust  
 St George's Hospital Tooting

For peer review only

- 1  St Marys Hospital, London  
2  St Richards hospital  
3  St Thomas' Hospital  
4  Torbay  
5  Tunbridge Wells Hospital  
6  Southport District General Hospital  
7  University College Hospital, London  
8  University Hospital Coventry and Warwickshire  
9  Warrington  
10  University Hospitals of Derby and Burton NHS Foundation Trust  
11  Watford General hospital  
12  West Middlesex University Hospital  
13  West Suffolk Hospital  
14  Frimley Park Hospital  
15  Wexham Park Hospital, Frimley Health NHS  
16  Whiston Hospital  
17  Wythenshawe Hospital  
18  Yeovil District Hospital  
19  York District hospital  
20  York Hospital Emergency Departments  
21  Whiston Hospital  
22  William Harvey Hospital  
23  Worthing Hospital  
24  University hospital of Hull  
25  North Middlesex  
26  Sandwell and West Birmingham  
27  Stoke Mandeville  
28  Colchester  
29  Alder Hey Children's Hospital  
30  Queen's Hospital, Romford  
31  Birmingham Children's Hospital  
32  Sunderland Royal Hospital  
33  Countess of Chester NHS foundation trust  
34  University hospital of North Durham  
35  Evelina Children's Hospital  
36  King's College, London  
37  Barnstaple  
38  Nottingham University Hospital  
39  Royal Alexandra Children's Hospital  
40  Royal Wolverhampton  
41  Salisbury NHS Trust  
42  Western Sussex NHS Trust  
43  Other  
44  Alder Hey Childrens Hospital  
45  Birmingham Women's and Childrens Hospital  
46  Countess of Chester  
47  Evelina, Guys and St Thomas's  
48  Kings College Hospital  
49  Royal Alexandra Children's Hospital, Brighton and Sussex  
50  New Cross Hospital  
51  Salisbury  
52  Barking, Havering & Redbridge - Queen's  
53  Barking, Havering & Redbridge - King George  
54  South Tyneside and Sunderland NHS Trust  
55  County Durham and Darlington  
56  North Manchester General Hospital



1  
2  
3  
4  
5  
6  
7  
8  
9  
10  
11  
12  
13  
14  
15  
16  
17  
18  
19  
20  
21  
22  
23  
24  
25  
26  
27  
28  
29  
30  
31  
32  
33  
34  
35  
36  
37  
38  
39  
40  
41  
42  
43  
44  
45  
46  
47  
48  
49  
50  
51  
52  
53  
54  
55  
56  
57  
58  
59  
60

---

Which hospital do you currently work in?

- University Hospital Galway
- Mater Misericordiae University Hospital, Dublin,
- Sligo University Hospital
- Limerick regional Hospital
- Other
- Children's Health Ireland at Crumlin
- Children's Health Ireland at Temple Street
- Children's Health Ireland at Tallaght
- Bon Secours Hospital
- Cork University Hospital

---

Please state the name of your hospital.

---

What type of patients do you see in your Emergency Department?

- Adults only
- Paediatrics only
- Mixture of Adults and Paediatrics

---

How old are you?

- 20-25
- 26-30
- 31-35
- 36-40
- 41-45
- 46-50
- 51-55
- 56-60
- 61- 65
- 66-70
- >70

---

What is your gender?

- Female
- Male
- Other
- Prefer not to say

**Please fill out the following "Need for Recovery Score". Please base this on the LAST MONTH of work (excluding leave).**

|                                                                                                                           | yes                   | no                    |
|---------------------------------------------------------------------------------------------------------------------------|-----------------------|-----------------------|
| I find it difficult to relax at the end of the working day?                                                               | <input type="radio"/> | <input type="radio"/> |
| By the end of the working day I feel really worn-out                                                                      | <input type="radio"/> | <input type="radio"/> |
| Because of my job, at the end of the working day I feel rather exhausted                                                  | <input type="radio"/> | <input type="radio"/> |
| After my breaks, I feel fresh to continue my work                                                                         | <input type="radio"/> | <input type="radio"/> |
| Generally speaking, I only start to feel relaxed on my second non-working day off                                         | <input type="radio"/> | <input type="radio"/> |
| I find it difficult to concentrate in my free time after work                                                             | <input type="radio"/> | <input type="radio"/> |
| I find it hard to show interest in other people when I have just come home from work                                      | <input type="radio"/> | <input type="radio"/> |
| In general, it takes me over an hour to feel fully recuperated after work                                                 | <input type="radio"/> | <input type="radio"/> |
| When I get home, I need to be left in peace for a while                                                                   | <input type="radio"/> | <input type="radio"/> |
| Often, after a day's work I feel so tired that I cannot get involved in other activities                                  | <input type="radio"/> | <input type="radio"/> |
| A feeling of tiredness prevents me from doing my work as well as I normally would during the last part of the working day | <input type="radio"/> | <input type="radio"/> |

How long have you worked in your current Emergency Department?

- 1 month or less
- 1-2 months
- 2-3 months
- 3-4 months
- 4-5 months
- 5-6 months
- 6 months - 1 year
- 1-2 years
- 2-3 years
- 3-5 years
- 5 -10 years
- 10 -15 years
- 15-20 years
- > 20 years

1 How long have you worked in Emergency Medicine in total in your career?  
2

- 3  1 year or less
- 4  1 year or more

5  
6 How many months have you worked in Emergency Medicine in total?  
7

8 \_\_\_\_\_  
9  
10

11  
12 How many years have you worked in Emergency Medicine in total?  
13

14 \_\_\_\_\_  
15  
16

17 What is your most frequent method of transport for your commute to work?  
18

- 19  Car
- 20  Motorbike
- 21  Bus
- 22  Train
- 23  Underground
- 24  Walk
- 25  Run
- 26  Cycle
- 27  I live on-site
- 28  Other

29  
30 You have selected other, how do you commute?  
31

32 \_\_\_\_\_  
33  
34  
35  
36  
37  
38  
39  
40  
41  
42  
43  
44  
45  
46  
47  
48  
49  
50  
51  
52  
53  
54  
55  
56  
57  
58  
59  
60

**How long does your commute take in minutes (one way)?**

|                   | 1-10<br>mins          | 11-20<br>mins         | 21-30<br>mins         | 31-40<br>mins         | 41-50<br>mins         | 51-60<br>mins         | 61-70<br>mins         | 71-80<br>mins         | 81-90<br>mins         | >90<br>mins           |
|-------------------|-----------------------|-----------------------|-----------------------|-----------------------|-----------------------|-----------------------|-----------------------|-----------------------|-----------------------|-----------------------|
| On an average day | <input type="radio"/> |
| On a good day     | <input type="radio"/> |
| On a bad day      | <input type="radio"/> |

What type of contract do you work?

- Full time  
 90%, less than full time  
 80%, less than full time  
 70%, less than full time  
 60%, less than full time  
 50%, less than full time  
 less than 50%, less than full time

Do you have dedicated contracted time away from Adult Emergency Medicine (e.g. subspecialty or GP) or work in Paediatric Emergency Medicine?

- Yes  
 No

Please select all that are applicable to your current contracted time.

- ICM  
 PEM  
 PHEM  
 Academic  
 Teaching  
 Leadership/Management  
 Paediatrics  
 GP  
 Other

What is your "other" contracted time?

\_\_\_\_\_

What percentage of your contract is spent in ICM rather than EM?

- 10%  
 20%  
 25%  
 30%  
 40%  
 50%  
 60%  
 70%  
 75%  
 80%  
 90%  
 100%

---

1 What percentage of your contract is spent in PEM rather than Adult EM?  
2

- 3  10%
- 4  20%
- 5  25%
- 6  30%
- 7  40%
- 8  50%
- 9  60%
- 10  70%
- 11  75%
- 12  80%
- 13  90%
- 14  100%

---

16 What percentage of your contract is spent in PHEM rather than Adult EM?  
17

- 18  10%
- 19  20%
- 20  25%
- 21  30%
- 22  40%
- 23  50%
- 24  60%
- 25  70%
- 26  75%
- 27  80%
- 28  90%
- 29  100%

---

31 What percentage of your contract is spent Academic rather than Adult EM?  
32

- 33  10%
- 34  20%
- 35  25%
- 36  30%
- 37  40%
- 38  50%
- 39  60%
- 40  70%
- 41  75%
- 42  80%
- 43  90%
- 44  100%

---

45 What percentage of your contract is spent Teaching rather than Adult EM?  
46

- 47  10%
- 48  20%
- 49  25%
- 50  30%
- 51  40%
- 52  50%
- 53  60%
- 54  70%
- 55  75%
- 56  80%
- 57  90%
- 58  100%
- 59
- 60

---

1 What percentage of your contract is spent management/leadership rather than Adult EM?  
2

- 3  10%  
4  20%  
5  25%  
6  30%  
7  40%  
8  50%  
9  60%  
10  70%  
11  75%  
12  80%  
13  90%  
14  100%

---

16 What percentage of your contract is spent doing paediatrics rather than EM?  
17

- 18  10%  
19  20%  
20  25%  
21  30%  
22  40%  
23  50%  
24  60%  
25  70%  
26  75%  
27  80%  
28  90%  
29  100%

---

31 What percentage of your contract is spent doing GP rather than Adult EM?  
32

- 33  10%  
34  20%  
35  25%  
36  30%  
37  40%  
38  50%  
39  60%  
40  70%  
41  75%  
42  80%  
43  90%  
44  100%

---

45 What percentage of your contract is spent doing "other" activities rather than Adult EM?  
46

- 47  10%  
48  20%  
49  25%  
50  30%  
51  40%  
52  50%  
53  60%  
54  70%  
55  75%  
56  80%  
57  90%  
58  100%  
59  
60

---

1 What is the maximum number of TOTAL clinical shifts you work in a week?  
2

- 3  1 shift
- 4  2 shifts
- 5  3 shifts
- 6  4 shifts
- 7  5 shifts
- 8  6 shifts
- 9  7 shifts

---

11 What is the maximum number of CONSECUTIVE clinical shifts you would be scheduled to work?  
12

- 13  1 shift
- 14  2 shifts
- 15  3 shifts
- 16  4 shifts
- 17  5 shifts
- 18  6 shifts
- 19  7 shifts
- 20  > 7 shifts

---

22 What is the maximum number of consecutive NIGHT shifts you would be scheduled to work in a row?  
23

- 24  0 shifts
- 25  1 shift
- 26  2 shifts
- 27  3 shifts
- 28  4 shifts
- 29  5 shifts
- 30  6 shifts
- 31  7 shifts

---

33 What is the maximum number of consecutive DAY shifts you would be scheduled to work in a row?  
34

- 35  0 shifts
- 36  1 shift
- 37  2 shifts
- 38  3 shifts
- 39  4 shifts
- 40  5 shifts
- 41  6 shifts
- 42  7 shifts

---

44 What is the maximum number of consecutive TWILIGHT shifts you would be scheduled to work in a row?  
45

- 46  0 shifts
- 47  1 shift
- 48  2 shifts
- 49  3 shifts
- 50  4 shifts
- 51  5 shifts
- 52  6 shifts
- 53  7 shifts

1 What is your scheduled weekend work frequency?  
2

- 3  1 in 2  
4  1 in 3  
5  1 in 4  
6  1 in 5  
7  1 in 6  
8  Less frequent than 1 in 6  
9  I don't work weekends

10  
11 Over the past month how many contracted non-clinical shifts have you had? E.g. SPA, teaching, clinical governance.  
12

- 13  0 shifts  
14  Between 0-1 shifts  
15  1 shift  
16  2 shifts  
17  3 shifts  
18  4 shifts  
19  5 shifts  
20  6 shifts  
21  7 shifts  
22  8 shifts  
23  9 shifts  
24  10 shifts  
25  11-15 shifts  
26  >15 shifts

27  
28 In the past month how many locum shifts have you  
29 worked? \_\_\_\_\_  
30

31 Over the past month, roughly how often have you left more than 15 minutes late following a clinical shift?  
32

- 33  Rarely  
34  A few times a month  
35  Once a week  
36  A few times a week  
37  Everyday

38  
39 Over the past month, how often have you taken your full entitlement of breaks during a clinical shift?  
40

- 41  Rarely  
42  A few times a month  
43  Once a week  
44  A few times a week  
45  Everyday

46  
47 What proportion would you say you spend working 'out of hours' (evenings, nights or weekends)?  
48

- 49  < 25%  
50  26-50%  
51  51-75%  
52  76-100%

53  
54 What proportion of your locum shifts would you say you spend working 'out of hours' (evenings, nights or weekends)?  
55

- 56  < 25%  
57  26-50%  
58  51-75%  
59  76-100%



1 I have been able to request and take the annual leave I wanted?  
2

- 3  Strongly disagree  
4  Disagree  
5  Neutral  
6  Agree  
7  Strongly agree  
8

9 I have been able to request and take the study leave I wanted?  
10

- 11  Strongly disagree  
12  Disagree  
13  Neutral  
14  Agree  
15  Strongly agree  
16

17 Over the past month, roughly how often have you found yourself feeling overwhelmed with work during a clinical  
18 shift?  
19

- 20  Rarely  
21  A few times a month  
22  Once a week  
23  A few times a week  
24  Everyday  
25

26 Do you consider yourself to have any long-term health conditions or disability?  
27

- 28  Yes  
29  No  
30  Prefer not to say  
31

32 Do you have significant caring responsibilities outside of work?  
33 (e.g. parent or main carer for a relative)  
34

- 35  Yes  
36  No  
37  Prefer not to say  
38

39 I feel at high risk of burnout from my job in the near future?  
40

- 41  Yes  
42  No  
43  Prefer not to say  
44

45 I feel I am currently suffering burnout from work?  
46

- 47  Yes  
48  No  
49  Prefer not to say  
50  
51  
52  
53  
54  
55  
56  
57  
58  
59  
60

# TIRED Site Survey

## Department Demographics

Name of emergency department and NHS trust?

\_\_\_\_\_

Number of attendances per year?

\_\_\_\_\_

Any specialist designation?

- Trauma unit  
 Adult major trauma centre  
 Stroke centre  
 PCI centre  
 Paediatric major trauma centre

Number of EM Consultants?

\_\_\_\_\_

Number of EM Middle Grades (ST4 and above)?

\_\_\_\_\_

Number of EM Middle grade career clinicians equivalent to > ST4 (eg associate specialist, specialty doctors, CESR or other non-training doctors)?

\_\_\_\_\_

Number of EM trainees ST3?

\_\_\_\_\_

Number of ACCS trainees ST1-2?

\_\_\_\_\_

Number of GP trainees ST1-3?

\_\_\_\_\_

Number of ED GPs?

\_\_\_\_\_

Number of Clinical Fellows (Fy1-ST3)?

\_\_\_\_\_

Number of Clinical Fellows (>=ST4)?

\_\_\_\_\_

Number of FY2s?

\_\_\_\_\_

Number of FY1s?

\_\_\_\_\_

Total number of ED Doctors calculated from the answers above:

\_\_\_\_\_

1 Out of the total number of doctors above, how many  
2 will be ineligible for the study due to absence  
3 during the study period? (eg maternity, sick or  
4 annual leave) \_\_\_\_\_  
5

6 What percentage of eligible EM doctors do you  
7 estimate you will enrol in the survey? (ie if you  
8 have 50 doctors and think you will enrol 25 at your  
9 site, that would be 50%).

\_\_\_\_\_  
(We are aiming for a response rate of 80% of  
eligible doctors as a minimum at each site but  
understand this not might be achievable.  
Therefore, this is an opportunity to document how  
many you think will be achievable at your site.)

14 Number of advanced nurse practitioners? \_\_\_\_\_  
15  
16

18 Number of advanced clinical practitioners? \_\_\_\_\_  
19  
20

21 Number of adult qualified EM nurses? \_\_\_\_\_  
22  
23

24 Number of paediatric qualified EM nurses? \_\_\_\_\_  
25  
26

28 Number of health care assistants (or equivalent)? \_\_\_\_\_  
29  
30

31 Number of EM physician associates? \_\_\_\_\_  
32  
33

34 Does your Consultant rota use self-rostering?

- Yes
- No

38 Does your Registrar rota use self-rostering?

- Yes
- No

41 Does your SHO rota use self-rostering?

- Yes
- No

**What are the current vacancy rates for permanent staff in the following roles?**

|                                          | 0-10%                 | 11-20%                | 21-30%                | 31-40%                | 41-50%                | 51-60%                | 61-70%                | 71-80%                | 81-90%                | 91-100%               |
|------------------------------------------|-----------------------|-----------------------|-----------------------|-----------------------|-----------------------|-----------------------|-----------------------|-----------------------|-----------------------|-----------------------|
| EM consultants                           | <input type="radio"/> |
| EM medical staff (excluding Consultants) | <input type="radio"/> |
| EM nursing staff                         | <input type="radio"/> |
| Non-medical staff                        | <input type="radio"/> |
| All staff                                | <input type="radio"/> |

What percentage of patients were seen within 4 hours in April 2019?

\_\_\_\_\_

What percentage of patients were seen within 4 hours in March 2019?

\_\_\_\_\_

What percentage of patients were seen within 4 hours in February 2019?

\_\_\_\_\_

What percentage of patients were seen within 4 hours in January 2019?

\_\_\_\_\_

What percentage of patients were seen within 4 hours in December 2018?

\_\_\_\_\_

What percentage of patients were seen within 4 hours in November 2018?

\_\_\_\_\_

1  
2  
3  
4  
5  
6  
7  
8  
9  
10  
11  
12  
13  
14  
15  
16  
17  
18  
19  
20  
21  
22  
23  
24  
25  
26  
27  
28  
29  
30  
31  
32  
33  
34  
35  
36  
37  
38  
39  
40  
41  
42  
43  
44  
45  
46  
47  
48  
49  
50  
51  
52  
53  
54  
55  
56  
57  
58  
59  
60

**What are the current sickness rates for the following staff groups?**

|                                          | 0-1%                  | 1-2%                  | 2-3%                  | 3-4%                  | 4-5%                  | 5-6%                  | 6-7%                  | 7-8%                  | 8-9%                  | 9-10%                 | >10%                  |
|------------------------------------------|-----------------------|-----------------------|-----------------------|-----------------------|-----------------------|-----------------------|-----------------------|-----------------------|-----------------------|-----------------------|-----------------------|
| EM Consultants                           | <input type="radio"/> |
| EM Medical Staff (excluding Consultants) | <input type="radio"/> |
| EM Nursing staff                         | <input type="radio"/> |
| Non-Medical Staff                        | <input type="radio"/> |
| All Staff                                | <input type="radio"/> |

For peer review only

**What is the Minimum Shift Length for the below groups of staff?**

|                                | 6 hours               | 7 hours               | 8 hours               | 9 hours               | 10 hours              | 11 hours              | 12 hours              | 13 hours              | N/A                   |
|--------------------------------|-----------------------|-----------------------|-----------------------|-----------------------|-----------------------|-----------------------|-----------------------|-----------------------|-----------------------|
| EM Consultants                 | <input type="radio"/> |
| EM Trainees, ST4 and above     | <input type="radio"/> |
| EM Non-training, ST4 and above | <input type="radio"/> |
| EM Trainees ST3                | <input type="radio"/> |
| ACCS Trainees ST1-2            | <input type="radio"/> |
| GP Trainees ST1-3              | <input type="radio"/> |
| Clinical Fellows (FY1- ST3)    | <input type="radio"/> |
| Clinical Fellows (>= ST4)      | <input type="radio"/> |
| Fy2 Doctors                    | <input type="radio"/> |
| Fy1 Doctors                    | <input type="radio"/> |

For peer review only

**What is the maximum shift length for the following groups of staff**

|                                | 6 hours               | 7 hours               | 8 hours               | 9 hours               | 10 hours              | 11 hours              | 12 hours              | 13 hours              | >13 hours             | N/A                   |
|--------------------------------|-----------------------|-----------------------|-----------------------|-----------------------|-----------------------|-----------------------|-----------------------|-----------------------|-----------------------|-----------------------|
| EM Consultants                 | <input type="radio"/> |
| EM Trainees, ST4 and above     | <input type="radio"/> |
| EM Non-trainees, ST4 and above | <input type="radio"/> |
| EM Trainees, ST3               | <input type="radio"/> |
| ACCS Trainees ST1-2            | <input type="radio"/> |
| GP Trainees, ST1-3             | <input type="radio"/> |
| Clinical Fellows (FY1 - ST3)   | <input type="radio"/> |
| Clinical Fellows (=>ST4)       | <input type="radio"/> |
| Fy2 Doctors                    | <input type="radio"/> |
| Fy1 Doctors                    | <input type="radio"/> |

For peer review only

**How many hours are each of the shifts on your SHO rota?  
(Select multiple if this changes depending on the shift)**

|                          | < 8 hours                | 8 hours                  | 9 hours                  | 10 hours                 | 11 hours                 | 12 hours                 | >12 hour                 |
|--------------------------|--------------------------|--------------------------|--------------------------|--------------------------|--------------------------|--------------------------|--------------------------|
| Day shift (week)         | <input type="checkbox"/> |
| Night shift (week)       | <input type="checkbox"/> |
| Twilight shift (week)    | <input type="checkbox"/> |
| Day shift (weekend)      | <input type="checkbox"/> |
| Night shift (weekend)    | <input type="checkbox"/> |
| Twilight shift (weekend) | <input type="checkbox"/> |

For peer review only

1  
2  
3  
4  
5  
6  
7  
8  
9  
10  
11  
12  
13  
14  
15  
16  
17  
18  
19  
20  
21  
22  
23  
24  
25  
26  
27  
28  
29  
30  
31  
32  
33  
34  
35  
36  
37  
38  
39  
40  
41  
42  
43  
44  
45  
46  
47  
48  
49  
50  
51  
52  
53  
54  
55  
56  
57  
58  
59  
60



**How many hours are each of the shifts on your registrar rota?**  
**(Select multiple if this changes depending on the shift)**

|                          | < 8 hours                | 8 hours                  | 9 hours                  | 10 hours                 | 11 hours                 | 12 hours                 | >12 hour                 |
|--------------------------|--------------------------|--------------------------|--------------------------|--------------------------|--------------------------|--------------------------|--------------------------|
| Day shift (week)         | <input type="checkbox"/> |
| Night shift (week)       | <input type="checkbox"/> |
| Twilight shift (week)    | <input type="checkbox"/> |
| Day shift (weekend)      | <input type="checkbox"/> |
| Night shift (weekend)    | <input type="checkbox"/> |
| Twilight shift (weekend) | <input type="checkbox"/> |

For peer review only

**How many hours are each of the shifts on your Consultant rota?**

|                          | < 8 hours             | 8 hours               | 9 hours               | 10 hours              | 11 hours              | 12 hours              | >12 hour              |
|--------------------------|-----------------------|-----------------------|-----------------------|-----------------------|-----------------------|-----------------------|-----------------------|
| Day shift (week)         | <input type="radio"/> |
| Night shift (week)       | <input type="radio"/> |
| Twilight shift (week)    | <input type="radio"/> |
| Day shift (weekend)      | <input type="radio"/> |
| Night shift (weekend)    | <input type="radio"/> |
| Twilight shift (weekend) | <input type="radio"/> |

Is there readily available rest facilities available for post night shifts?  Yes  
 No

Do people know how to access them?  Yes  
 No

Is there a break room available?  Yes  
 No

**Online Supplementary Material 4**  
**Table of Additional Participant Characteristics**

| Characteristic                                                                      | N (%)       | NFR Score                    |               |
|-------------------------------------------------------------------------------------|-------------|------------------------------|---------------|
|                                                                                     |             | Median (95% CI) <sup>1</sup> | [LQ - UQ]     |
| <b>Maximum number of consecutive day shifts you would be scheduled to work</b>      |             |                              |               |
| 0                                                                                   | 30 (0.7)    | 63.6 (50.1 to 77.2)          | [36.4 - 90.9] |
| 1                                                                                   | 42 (1.0)    | 59.1 (40.9 to 77.3)          | [27.3 - 90.9] |
| 2                                                                                   | 217 (5.3)   | 63.6 (55.1 to 72.2)          | [36.4 - 81.8] |
| 3                                                                                   | 522 (12.7)  | 63.6 (60.9 to 66.4)          | [36.4 - 81.8] |
| 4                                                                                   | 788 (19.2)  | 63.6 (63.6 to 63.6)          | [45.5 - 81.8] |
| 5                                                                                   | 1108 (27)   | 72.7 (70.0 to 75.5)          | [45.5 - 81.8] |
| 6                                                                                   | 309 (7.5)   | 72.7 (66.9 to 78.6)          | [54.5 - 90.9] |
| 7                                                                                   | 1094 (26.6) | 72.7 (72.7 to 72.7)          | [45.5 - 90.9] |
| Missing                                                                             | 137 (3.3)   | 72.7 (65.7 to 79.7)          | [50.0 - 90.9] |
| <b>Maximum number of consecutive Twilight shifts you would be scheduled to work</b> |             |                              |               |
| 0                                                                                   | 339 (8.2)   | 54.5 (48.3 to 60.8)          | [36.4 - 81.8] |
| 1                                                                                   | 341 (8.3)   | 60.0 (51.2 to 68.8)          | [36.4 - 81.8] |
| 2                                                                                   | 496 (12.1)  | 54.5 (49.9 to 59.2)          | [36.4 - 81.8] |
| 3                                                                                   | 796 (19.4)  | 63.6 (55.8 to 71.5)          | [45.5 - 81.8] |
| 4                                                                                   | 1100 (26.7) | 72.7 (69.9 to 75.5)          | [45.5 - 90.9] |
| 5                                                                                   | 600 (14.6)  | 72.7 (72.1 to 73.4)          | [54.5 - 90.9] |
| 6                                                                                   | 107 (2.6)   | 72.7 (67.6 to 77.8)          | [54.5 - 90.9] |
| 7                                                                                   | 334 (8.1)   | 81.8 (74.4 to 89.3)          | [54.5 - 90.9] |
| Missing                                                                             | 134 (3.3)   | 72.7 (67.3 to 78.1)          | [54.5 - 90.9] |
| <b>Maximum number of consecutive night shifts you would be scheduled to work</b>    |             |                              |               |
| 0                                                                                   | 1057 (25.6) | 54.5 (52.0 to 57.1)          | [27.3 - 80.0] |
| 1                                                                                   | 123 (3.0)   | 63.6 (53.2 to 74.0)          | [36.4 - 90.9] |
| 2                                                                                   | 153 (3.7)   | 54.5 (44.7 to 64.4)          | [45.5 - 81.8] |
| 3                                                                                   | 467 (11.3)  | 72.7 (65.6 to 79.9)          | [45.5 - 90.9] |
| 4                                                                                   | 2188 (53.1) | 72.7 (72.7 to 72.7)          | [54.5 - 90.9] |
| 5                                                                                   | 64 (1.6)    | 72.7 (64.4 to 81.1)          | [54.5 - 90.9] |
| 6                                                                                   | 6 (0.1)     | 54.5 (NA)                    | [45.5 - 81.8] |
| 7                                                                                   | 63 (1.5)    | 72.7 (64.4 to 81.1)          | [54.5 - 90.9] |
| Missing                                                                             | 126 (3.1)   | 72.7 (67.4 to 78.0)          | [54.5 - 90.9] |
| <b>Maximum number of clinical shifts you work in a typical week?</b>                |             |                              |               |
| 1                                                                                   | 27 (0.7)    | 63.6 (45.2 to 82.0)          | [45.5 - 90.9] |
| 2                                                                                   | 63 (1.5)    | 63.6 (49.2 to 78.1)          | [36.4 - 81.8] |

|                                                                         |             |                     |               |
|-------------------------------------------------------------------------|-------------|---------------------|---------------|
| 3                                                                       | 240 (5.9)   | 63.6 (58.1 to 69.2) | [36.4 - 81.8] |
| 4                                                                       | 553 (13.5)  | 63.6 (54.9 to 72.3) | [36.4 - 81.8] |
| 5                                                                       | 1074 (26.2) | 63.6 (62.1 to 65.2) | [45.5 - 81.8] |
| 6                                                                       | 858 (20.9)  | 72.7 (72.0 to 73.4) | [45.5 - 90.9] |
| 7                                                                       | 1285 (31.3) | 72.7 (72.7 to 72.7) | [45.5 - 90.9] |
| Missing                                                                 | 147 (3.6)   | 72.7 (67.1 to 78.3) | [45.5 - 90.9] |
| <b>Non-clinical shifts past month</b>                                   |             |                     |               |
| 0                                                                       | 1164 (28.3) | 72.7 (72.7 to 72.7) | [54.5 - 90.9] |
| <1                                                                      | 394 (9.6)   | 72.7 (72.1 to 73.4) | [54.5 - 90.9] |
| 1                                                                       | 525 (12.8)  | 72.7 (72.7 to 72.7) | [50.0 - 90.9] |
| 2                                                                       | 527 (12.8)  | 63.6 (57.3 to 70.0) | [45.5 - 81.8] |
| 3                                                                       | 242 (5.9)   | 63.6 (55.1 to 72.2) | [40.0 - 81.8] |
| 4                                                                       | 525 (12.8)  | 60.0 (51.5 to 68.5) | [36.4 - 81.8] |
| 5                                                                       | 115 (2.8)   | 54.5 (47.3 to 61.8) | [36.4 - 72.7] |
| 6                                                                       | 124 (3.0)   | 54.5 (45.6 to 63.5) | [31.7 - 80.9] |
| 7                                                                       | 39 (0.9)    | 63.6 (43.5 to 83.8) | [36.4 - 81.8] |
| 8                                                                       | 157 (3.8)   | 54.5 (45.2 to 63.9) | [36.4 - 81.8] |
| 9                                                                       | 19 (0.5)    | 60.0 (34.6 to 85.4) | [27.3 - 72.7] |
| 10                                                                      | 102 (2.5)   | 54.5 (45.2 to 63.9) | [36.4 - 80.0] |
| 11-15                                                                   | 86 (2.1)    | 54.5 (44.7 to 64.4) | [27.3 - 72.7] |
| >15                                                                     | 91 (2.2)    | 63.6 (47.6 to 79.7) | [27.3 - 81.8] |
| Missing                                                                 | 137 (3.3)   | 72.7 (66.6 to 78.9) | [54.5 - 90.9] |
| <b>Average commute in minutes</b>                                       |             |                     |               |
| 1-10                                                                    | 396 (9.6)   | 72.7 (64.2 to 81.3) | [45.5 - 81.8] |
| 11-20                                                                   | 814 (19.8)  | 72.7 (64.6 to 80.9) | [45.5 - 90.0] |
| 21-30                                                                   | 967 (23.5)  | 72.7 (64.6 to 80.8) | [45.5 - 90.9] |
| 31-40                                                                   | 703 (17.1)  | 63.6 (63.6 to 63.6) | [36.4 - 81.8] |
| 41-50                                                                   | 546 (13.3)  | 72.7 (64.5 to 81.0) | [45.5 - 90.9] |
| 51-60                                                                   | 365 (8.9)   | 72.7 (67.6 to 77.8) | [45.5 - 90.0] |
| >60                                                                     | 325 (7.9)   | 72.7 (66.9 to 78.5) | [45.5 - 90.9] |
| Missing                                                                 | 131 (3.2)   | 72.7 (68.4 to 77.1) | [54.5 - 90.9] |
| <b>Do you have a dedicated time away from adult emergency medicine?</b> |             |                     |               |
| No                                                                      | 3091 (75.2) | 72.7 (67.2 to 78.3) | [45.5 - 90.9] |
| Yes                                                                     | 1020 (24.8) | 63.6 (62.2 to 65.1) | [36.4 - 81.8] |
| Missing                                                                 | 136 (3.3)   | 72.7 (67.7 to 77.8) | [45.5 - 90.9] |

Frequency and percentage, median NFR score with 95% bootstrapped confidence intervals and the inter-quartile range of participants within each category.

<sup>1</sup> Bootstrapped 95% confidence intervals based on 1000 replications on a minimum of 8 observations.

**Online Supplementary Material 5**

**Summary of median quantile regression model fitted to the Need for Recovery (NFR) score with fixed effects for site, including the adjusted coefficient estimate (Adj. Coef. Est.) with corresponding 95% confidence interval (CI) and p-value.**

|                                                                                       | <b>Adj. Coeff. Est. (95% CI)</b> | <b>P-value<sup>1</sup></b> |
|---------------------------------------------------------------------------------------|----------------------------------|----------------------------|
| Constant<br>(baseline NFR score)                                                      | 59.51 (55.53 to 63.49)           | < 0.001                    |
| <b>Gender (baseline = Male)</b>                                                       |                                  |                            |
| • Female                                                                              | 3.38 (1.80 to 4.95)              | < 0.001                    |
| • Other/Prefer not to say                                                             | -0.10 (-7.84 to 7.64)            | 0.979                      |
| <b>Any long-term health conditions or disabilities (baseline = No)</b>                |                                  |                            |
| • Yes                                                                                 | 8.33 (5.73 to 10.93)             | < 0.001                    |
| • Prefer not to say                                                                   | 6.10 (1.78 to 10.43)             | 0.006                      |
| <b>ED paediatrics only? (baseline = No)</b>                                           |                                  |                            |
| • Yes                                                                                 | -8.47 (-12.97 to -3.98)          | < 0.001                    |
| <b>Clinical grade (baseline = Foundation)</b>                                         |                                  |                            |
| • ST1-ST2                                                                             | -0.20 (-2.55 to 2.16)            | 0.869                      |
| • > ST2                                                                               | 1.04 (-1.49 to 3.57)             | 0.421                      |
| • SASG                                                                                | -1.20 (-4.32 to 1.92)            | 0.450                      |
| • GP                                                                                  | -7.33 (-15.49 to 0.83)           | 0.078                      |
| • Consultant                                                                          | -4.94 (-7.72 to -2.17)           | < 0.001                    |
| <b>I have been able to request and take study when I wanted (baseline = Neutral)</b>  |                                  |                            |
| • Strongly disagree                                                                   | 3.45 (-0.19 to 7.10)             | 0.063                      |
| • Disagree                                                                            | 3.57 (0.53 to 6.61)              | 0.022                      |
| • Agree                                                                               | -1.18 (-3.36 to 1.00)            | 0.290                      |
| • Strongly agree                                                                      | -6.32 (-9.23 to -3.41)           | < 0.001                    |
| <b>I have been able to request and take annual when I wanted (baseline = Neutral)</b> |                                  |                            |
| • Strongly disagree                                                                   | 6.42 (2.69 to 10.15)             | 0.001                      |
| • Disagree                                                                            | 1.37 (-1.73 to 4.47)             | 0.385                      |
| • Agree                                                                               | -2.60 (-5.07 to -0.13)           | 0.039                      |
| • Strongly agree                                                                      | -4.31 (-7.33 to -1.28)           | 0.005                      |
| <b>Proportion of time spent working out of hours (baseline = 0-25%)</b>               |                                  |                            |
| • 26-50%                                                                              | 5.96 (3.16 to 8.76)              | < 0.001                    |
| • 51-75%                                                                              | 10.39 (7.54 to 13.25)            | < 0.001                    |
| • 76-100%                                                                             | 14.34 (10.92 to 17.75)           | < 0.001                    |

## Need for recovery amongst Emergency Physicians in the United Kingdom and Ireland: Findings from a Trainee Emergency Research Network (TERN) survey study

### Research Checklist: The Checklist for Reporting Results of Internet E-Surveys (CHERRIES)

| <b>CHERRIES CHECKLIST ADAPTED FROM:</b>                                                                                                                                                                                            |                                  |                                                                                                                                                                                                                                                                                                                                                                      |                                                                      |
|------------------------------------------------------------------------------------------------------------------------------------------------------------------------------------------------------------------------------------|----------------------------------|----------------------------------------------------------------------------------------------------------------------------------------------------------------------------------------------------------------------------------------------------------------------------------------------------------------------------------------------------------------------|----------------------------------------------------------------------|
| Eysenbach, Gunther. "Improving the quality of Web surveys: the Checklist for Reporting Results of Internet E-Surveys (CHERRIES)." <i>Journal of medical Internet research</i> vol. 6,3 e34. 29 Sep. 2004, doi:10.2196/jmir.6.3.e34 |                                  |                                                                                                                                                                                                                                                                                                                                                                      |                                                                      |
| <b>Item Category</b>                                                                                                                                                                                                               | <b>Checklist Item</b>            | <b>Explanation</b>                                                                                                                                                                                                                                                                                                                                                   | <b>Checklist Response</b>                                            |
| <b>IRB (Institutional Review Board) approval and informed consent process</b>                                                                                                                                                      | Describe survey design           | Describe target population, sample frame. Is the sample a convenience sample? (In "open" surveys this is most likely.)                                                                                                                                                                                                                                               | <b>Outlined in 'Methods'</b>                                         |
|                                                                                                                                                                                                                                    | IRB approval                     | Mention whether the study has been approved by an IRB.                                                                                                                                                                                                                                                                                                               | <b>Outlined in 'Ethics Approval'</b>                                 |
|                                                                                                                                                                                                                                    | Informed consent                 | Describe the informed consent process. Where were the participants told the length of time of the survey, which data were stored and where and for how long, who the investigator was, and the purpose of the study?                                                                                                                                                 | <b>Outlined in Survey Distribution, monitoring and recruitment</b>   |
|                                                                                                                                                                                                                                    | Data protection                  | If any personal information was collected or stored, describe what mechanisms were used to protect unauthorized access.                                                                                                                                                                                                                                              | <b>Outlined in Survey Distribution, monitoring and recruitment</b>   |
| <b>Development and pre-testing</b>                                                                                                                                                                                                 | Development and testing          | State how the survey was developed, including whether the usability and technical functionality of the electronic questionnaire had been tested before fielding the questionnaire.                                                                                                                                                                                   | <b>Outlined in 'Survey Development'</b>                              |
| <b>Recruitment process and description of the sample having access to the questionnaire</b>                                                                                                                                        | Open survey versus closed survey | An "open survey" is a survey open for each visitor of a site, while a closed survey is only open to a sample which the investigator knows (password-protected survey).                                                                                                                                                                                               | <b>Outlined in Survey Distribution, monitoring and recruitment</b>   |
|                                                                                                                                                                                                                                    | Contact mode                     | Indicate whether or not the initial contact with the potential participants was made on the Internet. (Investigators may also send out questionnaires by mail and allow for Web-based data entry.)                                                                                                                                                                   | <b>Outlined in 'Survey Distribution, monitoring and recruitment'</b> |
|                                                                                                                                                                                                                                    | Advertising the survey           | How/where was the survey announced or advertised? Some examples are offline media (newspapers), or online (mailing lists – If yes, which ones?) or banner ads (Where were these banner ads posted and what did they look like?). It is important to know the wording of the announcement as it will heavily influence who chooses to participate. Ideally the survey | <b>Outlined in 'Survey Distribution, monitoring and recruitment'</b> |

|                              |                                          |                                                                                                                                                                                                                                                                                                                                                                                                                                              |                                                                      |
|------------------------------|------------------------------------------|----------------------------------------------------------------------------------------------------------------------------------------------------------------------------------------------------------------------------------------------------------------------------------------------------------------------------------------------------------------------------------------------------------------------------------------------|----------------------------------------------------------------------|
|                              |                                          | announcement should be published as an appendix.                                                                                                                                                                                                                                                                                                                                                                                             |                                                                      |
| <b>Survey administration</b> | Web/E-mail                               | State the type of e-survey (eg, one posted on a Web site, or one sent out through e-mail). If it is an e-mail survey, were the responses entered manually into a database, or was there an automatic method for capturing responses?                                                                                                                                                                                                         | <b>Outlined in 'Survey Distribution, monitoring and recruitment'</b> |
|                              | Context                                  | Describe the Web site (for mailing list/newsgroup) in which the survey was posted. What is the Web site about, who is visiting it, what are visitors normally looking for? Discuss to what degree the content of the Web site could pre-select the sample or influence the results. For example, a survey about vaccination on a anti-immunization Web site will have different results from a Web survey conducted on a government Web site | <b>Outlined in 'Design'</b>                                          |
|                              | Mandatory/voluntary                      | Was it a mandatory survey to be filled in by every visitor who wanted to enter the Web site, or was it a voluntary survey?                                                                                                                                                                                                                                                                                                                   | <b>Outlined in 'Survey Distribution, monitoring and recruitment'</b> |
|                              | Incentives                               | Were any incentives offered (eg, monetary, prizes, or non-monetary incentives such as an offer to provide the survey results)?                                                                                                                                                                                                                                                                                                               | <b>No</b>                                                            |
|                              | Time/Date                                | In what timeframe were the data collected?                                                                                                                                                                                                                                                                                                                                                                                                   | <b>Outlined in 'Sites and settings'</b>                              |
|                              | Randomization of items or questionnaires | To prevent biases items can be randomized or alternated.                                                                                                                                                                                                                                                                                                                                                                                     | <b>Not done</b>                                                      |
|                              | Adaptive questioning                     | Use adaptive questioning (certain items, or only conditionally displayed based on responses to other items) to reduce number and complexity of the questions                                                                                                                                                                                                                                                                                 | <b>Outlined in Survey Distribution, monitoring and recruitment</b>   |
|                              | Number of Items                          | What was the number of questionnaire items per page? The number of items is an important factor for the completion rate.                                                                                                                                                                                                                                                                                                                     | <b>Outlined in 'Design'</b>                                          |
|                              | Number of screens (pages)                | Over how many pages was the questionnaire distributed? The number of items is an important factor for the completion rate.                                                                                                                                                                                                                                                                                                                   | <b>Outlined in 'Design'</b>                                          |
|                              | Completeness check                       | It is technically possible to do consistency or completeness checks before the questionnaire is submitted. Was this done, and if "yes", how (usually JavaScript)? An alternative is to check for completeness after the questionnaire has been submitted (and highlight mandatory items). If this has been done, it should be reported. All items should provide a non-response option such as "not applicable" or                           | <b>Not done</b>                                                      |

|                                                             |                                                                                                           |                                                                                                                                                                                                                                                                                                                                                                                                                                                                                                                                |                                                                                            |
|-------------------------------------------------------------|-----------------------------------------------------------------------------------------------------------|--------------------------------------------------------------------------------------------------------------------------------------------------------------------------------------------------------------------------------------------------------------------------------------------------------------------------------------------------------------------------------------------------------------------------------------------------------------------------------------------------------------------------------|--------------------------------------------------------------------------------------------|
|                                                             |                                                                                                           | “rather not say”, and selection of one response option should be enforced.                                                                                                                                                                                                                                                                                                                                                                                                                                                     |                                                                                            |
|                                                             | Review step                                                                                               | State whether respondents were able to review and change their answers (eg, through a Back button or a Review step which displays a summary of the responses and asks the respondents if they are correct).                                                                                                                                                                                                                                                                                                                    | <b><i>Outlined in Survey Distribution, monitoring and recruitment</i></b>                  |
| <b>Response rates</b>                                       | Unique site visitor                                                                                       | If you provide view rates or participation rates, you need to define how you determined a unique visitor. There are different techniques available, based on IP addresses or cookies or both.                                                                                                                                                                                                                                                                                                                                  | <b><i>Outlined in ‘Results’</i></b>                                                        |
|                                                             | View rate (Ratio of unique survey visitors/unique site visitors)                                          | Requires counting unique visitors to the first page of the survey, divided by the number of unique site visitors (not page views!). It is not unusual to have view rates of less than 0.1 % if the survey is voluntary                                                                                                                                                                                                                                                                                                         | <b><i>Survey site contains first page of survey therefore N/A</i></b>                      |
|                                                             | Participation rate (Ratio of unique visitors who agreed to participate/unique first survey page visitors) | Count the unique number of people who filled in the first survey page (or agreed to participate, for example by checking a checkbox), divided by visitors who visit the first page of the survey (or the informed consents page, if present). This can also be called “recruitment” rate.                                                                                                                                                                                                                                      | <b><i>Outlined in ‘Results’</i></b>                                                        |
|                                                             | Completion rate (Ratio of users who finished the survey/users who agreed to participate)                  | The number of people submitting the last questionnaire page, divided by the number of people who agreed to participate (or submitted the first survey page). This is only relevant if there is a separate “informed consent” page or if the survey goes over several pages. This is a measure for attrition. Note that “completion” can involve leaving questionnaire items blank. This is not a measure for how completely questionnaires were filled in. (If you need a measure for this, use the word “completeness rate”.) | <b><i>Outlined in ‘Results’</i></b>                                                        |
| <b>Preventing multiple entries from the same individual</b> | Cookies used                                                                                              | Indicate whether cookies were used to assign a unique user identifier to each client computer. If so, mention the page on which the cookie was set and read, and how long the cookie was valid. Were duplicate entries avoided by preventing users access to the survey twice; or were duplicate database entries having the same user ID eliminated before analysis? In the latter case, which entries were kept for analysis (eg, the first entry or the most recent)?                                                       | <b><i>Not used</i></b>                                                                     |
|                                                             | IP check                                                                                                  | Indicate whether the IP address of the client computer was used to identify potential duplicate entries from the same user. If so, mention the period of                                                                                                                                                                                                                                                                                                                                                                       | <b><i>Not used due to survey being completed on multi-user/single log-in computers</i></b> |



|                 |                                                     |                                                                                                                                                                                                                                                                                                                                                                                                                                   |                                    |
|-----------------|-----------------------------------------------------|-----------------------------------------------------------------------------------------------------------------------------------------------------------------------------------------------------------------------------------------------------------------------------------------------------------------------------------------------------------------------------------------------------------------------------------|------------------------------------|
|                 |                                                     | time for which no two entries from the same IP address were allowed (eg, 24 hours). Were duplicate entries avoided by preventing users with the same IP address access to the survey twice; or were duplicate database entries having the same IP address within a given period of time eliminated before analysis? If the latter, which entries were kept for analysis (eg, the first entry or the most recent)?                 |                                    |
|                 | Log file analysis                                   | Indicate whether other techniques to analyze the log file for identification of multiple entries were used. If so, please describe.                                                                                                                                                                                                                                                                                               | <b>Not done</b>                    |
|                 | Registration                                        | In “closed” (non-open) surveys, users need to login first and it is easier to prevent duplicate entries from the same user. Describe how this was done. For example, was the survey never displayed a second time once the user had filled it in, or was the username stored together with the survey results and later eliminated? If the latter, which entries were kept for analysis (eg, the first entry or the most recent)? | <b>N/A</b>                         |
| <b>Analysis</b> | Handling of incomplete questionnaires               | Were only completed questionnaires analyzed? Were questionnaires which terminated early (where, for example, users did not go through all questionnaire pages) also analyzed?                                                                                                                                                                                                                                                     | <b>Outlined in ‘Data Analysis’</b> |
|                 | Questionnaires submitted with an atypical timestamp | Some investigators may measure the time people needed to fill in a questionnaire and exclude questionnaires that were submitted too soon. Specify the timeframe that was used as a cut-off point, and describe how this point was determined                                                                                                                                                                                      | <b>N/A</b>                         |
|                 | Statistical correction                              | Indicate whether any methods such as weighting of items or propensity scores have been used to adjust for the non-representative sample; if so, please describe the methods.                                                                                                                                                                                                                                                      | <b>Outlined in ‘Data Analysis’</b> |
