# Supplementary material for: Need for recovery amongst emergency physicians in the UK and Ireland: a cross-sectional survey
Source: HighWire-hosted journal article supplement (doi:10.1136/bmjopen-2020-041485), 2020-11-01
Supplement: bmjopen-2020-041485supp003_data_supplement.pdf [file bmjopen-2020-041485supp003_data_supplement.pdf]

Confidential

Page 1 of 9

# TIRED Site Survey

## Department Demographics

Name of emergency department and NHS trust?

---

Number of attendances per year?

---

Any specialist designation?

- ☐ Trauma unit
- ☐ Adult major trauma centre
- ☐ Stroke centre
- ☐ PCI centre
- ☐ Paediatric major trauma centre

Number of EM Consultants?

---

Number of EM Middle Grades (ST4 and above)?

---

Number of EM Middle grade career clinicians equivalent to &gt; ST4 (eg associate specialist, specialty doctors, CESR or other non-training doctors)?

---

Number of EM trainees ST3?

---

Number of ACCS trainees ST1-2?

---

Number of GP trainees ST1-3?

---

Number of ED GPs?

---

Number of Clinical Fellows (Fy1-ST3)?

---

Number of Clinical Fellows ( $\geq$ ST4)?

---

Number of FY2s?

---

Number of FY1s?

---

Total number of ED Doctors calculated from the answers above:

---

## Confidential

Page 2 of 9

---

Out of the total number of doctors above, how many will be ineligible for the study due to absence during the study period? (eg maternity, sick or annual leave)

---

---

What percentage of eligible EM doctors do you estimate you will enrol in the survey? (ie if you have 50 doctors and think you will enrol 25 at your site, that would be 50%).

---

(We are aiming for a response rate of 80% of eligible doctors as a minimum at each site but understand this not might be achievable. Therefore, this is an opportunity to document how many you think will be achievable at your site.)

---

---

Number of advanced nurse practitioners?

---

---

Number of advanced clinical practitioners?

---

---

Number of adult qualified EM nurses?

---

---

Number of paediatric qualified EM nurses?

---

---

Number of health care assistants (or equivalents)?

---

---

Number of EM physician associates?

---

---

Does your Consultant rota use self-rostering?

☐ Yes  
☐ No

---

Does your Registrar rota use self-rostering?

☐ Yes  
☐ No

---

Does your SHO rota use self-rostering?

☐ Yes  
☐ No

Confidential

Page 3 of 9

**What are the current vacancy rates for permanent staff in the following roles?**

|                                          | 0-10%                 | 11-20%                | 21-30%                | 31-40%                | 41-50%                | 51-60%                | 61-70%                | 71-80%                | 81-90%                | 91-100%               |
|------------------------------------------|-----------------------|-----------------------|-----------------------|-----------------------|-----------------------|-----------------------|-----------------------|-----------------------|-----------------------|-----------------------|
| EM consultants                           | <input type="radio"/> |
| EM medical staff (excluding Consultants) | <input type="radio"/> |
| EM nursing staff                         | <input type="radio"/> |
| Non-medical staff                        | <input type="radio"/> |
| All staff                                | <input type="radio"/> |

What percentage of patients were seen within 4 hours in April 2019?

---

What percentage of patients were seen within 4 hours in March 2019?

---

What percentage of patients were seen within 4 hours in February 2019?

---

What percentage of patients were seen within 4 hours in January 2019?

---

What percentage of patients were seen within 4 hours in December 2018?

---

What percentage of patients were seen within 4 hours in November 2018?

---

Confidential

Page 4 of 9

| What are the current sickness rates for the following staff groups? | 0-1%                  | 1-2%                  | 2-3%                  | 3-4%                  | 4-5%                  | 5-6%                  | 6-7%                  | 7-8%                  | 8-9%                  | 9-10%                 | >10%                  |
|---------------------------------------------------------------------|-----------------------|-----------------------|-----------------------|-----------------------|-----------------------|-----------------------|-----------------------|-----------------------|-----------------------|-----------------------|-----------------------|
| EM Consultants                                                      | <input type="radio"/> |
| EM Medical Staff (excluding Consultants)                            | <input type="radio"/> |
| EM Nursing staff                                                    | <input type="radio"/> |
| Non-Medical Staff                                                   | <input type="radio"/> |
| All Staff                                                           | <input type="radio"/> |

Confidential

Page 5 of 9

| What is the Minimum Shift Length for the below groups of staff? |                       |                       |                       |                       |                       |                       |                       |                       |                       |
|-----------------------------------------------------------------|-----------------------|-----------------------|-----------------------|-----------------------|-----------------------|-----------------------|-----------------------|-----------------------|-----------------------|
|                                                                 | 6 hours               | 7 hours               | 8 hours               | 9 hours               | 10 hours              | 11 hours              | 12 hours              | 13 hours              | N/A                   |
| EM Consultants                                                  | <input type="radio"/> |
| EM Trainees, ST4 and above                                      | <input type="radio"/> |
| EM Non-training, ST4 and above                                  | <input type="radio"/> |
| EM Trainees ST3                                                 | <input type="radio"/> |
| ACCS Trainees ST1-2                                             | <input type="radio"/> |
| GP Trainees ST1-3                                               | <input type="radio"/> |
| Clinical Fellows (FY1- ST3)                                     | <input type="radio"/> |
| Clinical Fellows (>= ST4)                                       | <input type="radio"/> |
| Fy2 Doctors                                                     | <input type="radio"/> |
| Fy1 Doctors                                                     | <input type="radio"/> |

Confidential

Page 6 of 9

| What is the maximum shift length for the following groups of staff |                       |                       |                       |                       |                       |                       |                       |                       |                       |                       |
|--------------------------------------------------------------------|-----------------------|-----------------------|-----------------------|-----------------------|-----------------------|-----------------------|-----------------------|-----------------------|-----------------------|-----------------------|
|                                                                    | 6 hours               | 7 hours               | 8 hours               | 9 hours               | 10 hours              | 11 hours              | 12 hours              | 13 hours              | >13 hours             | N/A                   |
| EM Consultants                                                     | <input type="radio"/> |
| EM Trainees, ST4 and above                                         | <input type="radio"/> |
| EM Non-trainees, ST4 and above                                     | <input type="radio"/> |
| EM Trainees, ST3                                                   | <input type="radio"/> |
| ACCS Trainees ST1-2                                                | <input type="radio"/> |
| GP Trainees, ST1-3                                                 | <input type="radio"/> |
| Clinical Fellows (FY1 - ST3)                                       | <input type="radio"/> |
| Clinical Fellows (=>ST4)                                           | <input type="radio"/> |
| Fy2 Doctors                                                        | <input type="radio"/> |
| Fy1 Doctors                                                        | <input type="radio"/> |

Confidential

| How many hours are each of the shifts on your SHO rota?<br>(Select multiple if this changes depending on the shift) |                          |                          |                          |                          |                          |                          |                          |
|---------------------------------------------------------------------------------------------------------------------|--------------------------|--------------------------|--------------------------|--------------------------|--------------------------|--------------------------|--------------------------|
|                                                                                                                     | < 8 hours                | 8 hours                  | 9 hours                  | 10 hours                 | 11 hours                 | 12 hours                 | >12 hour                 |
| Day shift (week)                                                                                                    | <input type="checkbox"/> |
| Night shift (week)                                                                                                  | <input type="checkbox"/> |
| Twilight shift (week)                                                                                               | <input type="checkbox"/> |
| Day shift (weekend)                                                                                                 | <input type="checkbox"/> |
| Night shift (weekend)                                                                                               | <input type="checkbox"/> |
| Twilight shift (weekend)                                                                                            | <input type="checkbox"/> |

Confidential

| How many hours are each of the shifts on your registrar rota?<br>(Select multiple if this changes depending on the shift) |                          |                          |                          |                          |                          |                          |                          |
|---------------------------------------------------------------------------------------------------------------------------|--------------------------|--------------------------|--------------------------|--------------------------|--------------------------|--------------------------|--------------------------|
|                                                                                                                           | < 8 hours                | 8 hours                  | 9 hours                  | 10 hours                 | 11 hours                 | 12 hours                 | >12 hour                 |
| Day shift (week)                                                                                                          | <input type="checkbox"/> |
| Night shift (week)                                                                                                        | <input type="checkbox"/> |
| Twilight shift (week)                                                                                                     | <input type="checkbox"/> |
| Day shift (weekend)                                                                                                       | <input type="checkbox"/> |
| Night shift (weekend)                                                                                                     | <input type="checkbox"/> |
| Twilight shift (weekend)                                                                                                  | <input type="checkbox"/> |

Confidential

Page 9 of 9

**How many hours are each of the shifts on your Consultant rota?**

|                          | < 8 hours             | 8 hours               | 9 hours               | 10 hours              | 11 hours              | 12 hours              | >12 hour              |
|--------------------------|-----------------------|-----------------------|-----------------------|-----------------------|-----------------------|-----------------------|-----------------------|
| Day shift (week)         | <input type="radio"/> |
| Night shift (week)       | <input type="radio"/> |
| Twilight shift (week)    | <input type="radio"/> |
| Day shift (weekend)      | <input type="radio"/> |
| Night shift (weekend)    | <input type="radio"/> |
| Twilight shift (weekend) | <input type="radio"/> |

Is there readily available rest facilities available for post night shifts? ☐ Yes  
☐ No

Do people know how to access them? ☐ Yes  
☐ No

Is there a break room available? ☐ Yes  
☐ No
