# Supplementary material for: Need for recovery amongst emergency physicians in the UK and Ireland: a cross-sectional survey
Source: HighWire-hosted journal article supplement (doi:10.1136/bmjopen-2020-041485), 2020-11-01
Supplement: bmjopen-2020-041485supp004_data_supplement.pdf [file bmjopen-2020-041485supp004_data_supplement.pdf]

**Online Supplementary Material 4**  
**Table of Additional Participant Characteristics**

| Characteristic                                                               | N (%)       | NFR Score                    |               |
|------------------------------------------------------------------------------|-------------|------------------------------|---------------|
|                                                                              |             | Median (95% CI) <sup>1</sup> | [LQ - UQ]     |
| Maximum number of consecutive day shifts you would be scheduled to work      |             |                              |               |
| 0                                                                            | 30 (0.7)    | 63.6 (50.1 to 77.2)          | [36.4 - 90.9] |
| 1                                                                            | 42 (1.0)    | 59.1 (40.9 to 77.3)          | [27.3 - 90.9] |
| 2                                                                            | 217 (5.3)   | 63.6 (55.1 to 72.2)          | [36.4 - 81.8] |
| 3                                                                            | 522 (12.7)  | 63.6 (60.9 to 66.4)          | [36.4 - 81.8] |
| 4                                                                            | 788 (19.2)  | 63.6 (63.6 to 63.6)          | [45.5 - 81.8] |
| 5                                                                            | 1108 (27)   | 72.7 (70.0 to 75.5)          | [45.5 - 81.8] |
| 6                                                                            | 309 (7.5)   | 72.7 (66.9 to 78.6)          | [54.5 - 90.9] |
| 7                                                                            | 1094 (26.6) | 72.7 (72.7 to 72.7)          | [45.5 - 90.9] |
| Missing                                                                      | 137 (3.3)   | 72.7 (65.7 to 79.7)          | [50.0 - 90.9] |
| Maximum number of consecutive Twilight shifts you would be scheduled to work |             |                              |               |
| 0                                                                            | 339 (8.2)   | 54.5 (48.3 to 60.8)          | [36.4 - 81.8] |
| 1                                                                            | 341 (8.3)   | 60.0 (51.2 to 68.8)          | [36.4 - 81.8] |
| 2                                                                            | 496 (12.1)  | 54.5 (49.9 to 59.2)          | [36.4 - 81.8] |
| 3                                                                            | 796 (19.4)  | 63.6 (55.8 to 71.5)          | [45.5 - 81.8] |
| 4                                                                            | 1100 (26.7) | 72.7 (69.9 to 75.5)          | [45.5 - 90.9] |
| 5                                                                            | 600 (14.6)  | 72.7 (72.1 to 73.4)          | [54.5 - 90.9] |
| 6                                                                            | 107 (2.6)   | 72.7 (67.6 to 77.8)          | [54.5 - 90.9] |
| 7                                                                            | 334 (8.1)   | 81.8 (74.4 to 89.3)          | [54.5 - 90.9] |
| Missing                                                                      | 134 (3.3)   | 72.7 (67.3 to 78.1)          | [54.5 - 90.9] |
| Maximum number of consecutive night shifts you would be scheduled to work    |             |                              |               |
| 0                                                                            | 1057 (25.6) | 54.5 (52.0 to 57.1)          | [27.3 - 80.0] |
| 1                                                                            | 123 (3.0)   | 63.6 (53.2 to 74.0)          | [36.4 - 90.9] |
| 2                                                                            | 153 (3.7)   | 54.5 (44.7 to 64.4)          | [45.5 - 81.8] |
| 3                                                                            | 467 (11.3)  | 72.7 (65.6 to 79.9)          | [45.5 - 90.9] |
| 4                                                                            | 2188 (53.1) | 72.7 (72.7 to 72.7)          | [54.5 - 90.9] |
| 5                                                                            | 64 (1.6)    | 72.7 (64.4 to 81.1)          | [54.5 - 90.9] |
| 6                                                                            | 6 (0.1)     | 54.5 (NA)                    | [45.5 - 81.8] |
| 7                                                                            | 63 (1.5)    | 72.7 (64.4 to 81.1)          | [54.5 - 90.9] |
| Missing                                                                      | 126 (3.1)   | 72.7 (67.4 to 78.0)          | [54.5 - 90.9] |
| Maximum number of clinical shifts you work in a typical week?                |             |                              |               |
| 1                                                                            | 27 (0.7)    | 63.6 (45.2 to 82.0)          | [45.5 - 90.9] |
| 2                                                                            | 63 (1.5)    | 63.6 (49.2 to 78.1)          | [36.4 - 81.8] |

|                                                                         |             |                     |               |
|-------------------------------------------------------------------------|-------------|---------------------|---------------|
| 3                                                                       | 240 (5.9)   | 63.6 (58.1 to 69.2) | [36.4 - 81.8] |
| 4                                                                       | 553 (13.5)  | 63.6 (54.9 to 72.3) | [36.4 - 81.8] |
| 5                                                                       | 1074 (26.2) | 63.6 (62.1 to 65.2) | [45.5 - 81.8] |
| 6                                                                       | 858 (20.9)  | 72.7 (72.0 to 73.4) | [45.5 - 90.9] |
| 7                                                                       | 1285 (31.3) | 72.7 (72.7 to 72.7) | [45.5 - 90.9] |
| Missing                                                                 | 147 (3.6)   | 72.7 (67.1 to 78.3) | [45.5 - 90.9] |
| <b>Non-clinical shifts past month</b>                                   |             |                     |               |
| 0                                                                       | 1164 (28.3) | 72.7 (72.7 to 72.7) | [54.5 - 90.9] |
| <1                                                                      | 394 (9.6)   | 72.7 (72.1 to 73.4) | [54.5 - 90.9] |
| 1                                                                       | 525 (12.8)  | 72.7 (72.7 to 72.7) | [50.0 - 90.9] |
| 2                                                                       | 527 (12.8)  | 63.6 (57.3 to 70.0) | [45.5 - 81.8] |
| 3                                                                       | 242 (5.9)   | 63.6 (55.1 to 72.2) | [40.0 - 81.8] |
| 4                                                                       | 525 (12.8)  | 60.0 (51.5 to 68.5) | [36.4 - 81.8] |
| 5                                                                       | 115 (2.8)   | 54.5 (47.3 to 61.8) | [36.4 - 72.7] |
| 6                                                                       | 124 (3.0)   | 54.5 (45.6 to 63.5) | [31.7 - 80.9] |
| 7                                                                       | 39 (0.9)    | 63.6 (43.5 to 83.8) | [36.4 - 81.8] |
| 8                                                                       | 157 (3.8)   | 54.5 (45.2 to 63.9) | [36.4 - 81.8] |
| 9                                                                       | 19 (0.5)    | 60.0 (34.6 to 85.4) | [27.3 - 72.7] |
| 10                                                                      | 102 (2.5)   | 54.5 (45.2 to 63.9) | [36.4 - 80.0] |
| 11-15                                                                   | 86 (2.1)    | 54.5 (44.7 to 64.4) | [27.3 - 72.7] |
| >15                                                                     | 91 (2.2)    | 63.6 (47.6 to 79.7) | [27.3 - 81.8] |
| Missing                                                                 | 137 (3.3)   | 72.7 (66.6 to 78.9) | [54.5 - 90.9] |
| <b>Average commute in minutes</b>                                       |             |                     |               |
| 1-10                                                                    | 396 (9.6)   | 72.7 (64.2 to 81.3) | [45.5 - 81.8] |
| 11-20                                                                   | 814 (19.8)  | 72.7 (64.6 to 80.9) | [45.5 - 90.0] |
| 21-30                                                                   | 967 (23.5)  | 72.7 (64.6 to 80.8) | [45.5 - 90.9] |
| 31-40                                                                   | 703 (17.1)  | 63.6 (63.6 to 63.6) | [36.4 - 81.8] |
| 41-50                                                                   | 546 (13.3)  | 72.7 (64.5 to 81.0) | [45.5 - 90.9] |
| 51-60                                                                   | 365 (8.9)   | 72.7 (67.6 to 77.8) | [45.5 - 90.0] |
| >60                                                                     | 325 (7.9)   | 72.7 (66.9 to 78.5) | [45.5 - 90.9] |
| Missing                                                                 | 131 (3.2)   | 72.7 (68.4 to 77.1) | [54.5 - 90.9] |
| <b>Do you have a dedicated time away from adult emergency medicine?</b> |             |                     |               |
| No                                                                      | 3091 (75.2) | 72.7 (67.2 to 78.3) | [45.5 - 90.9] |
| Yes                                                                     | 1020 (24.8) | 63.6 (62.2 to 65.1) | [36.4 - 81.8] |
| Missing                                                                 | 136 (3.3)   | 72.7 (67.7 to 77.8) | [45.5 - 90.9] |

Frequency and percentage, median NFR score with 95% bootstrapped confidence intervals and the inter-quartile range of participants within each category.

<sup>1</sup> Bootstrapped 95% confidence intervals based on 1000 replications on a minimum of 8 observations.
