# Supplementary figures and images for: Need for recovery amongst emergency physicians in the UK and Ireland: a cross-sectional survey
Source: HighWire-hosted journal article supplement (doi:10.1136/bmjopen-2020-041485), 2020-11-01

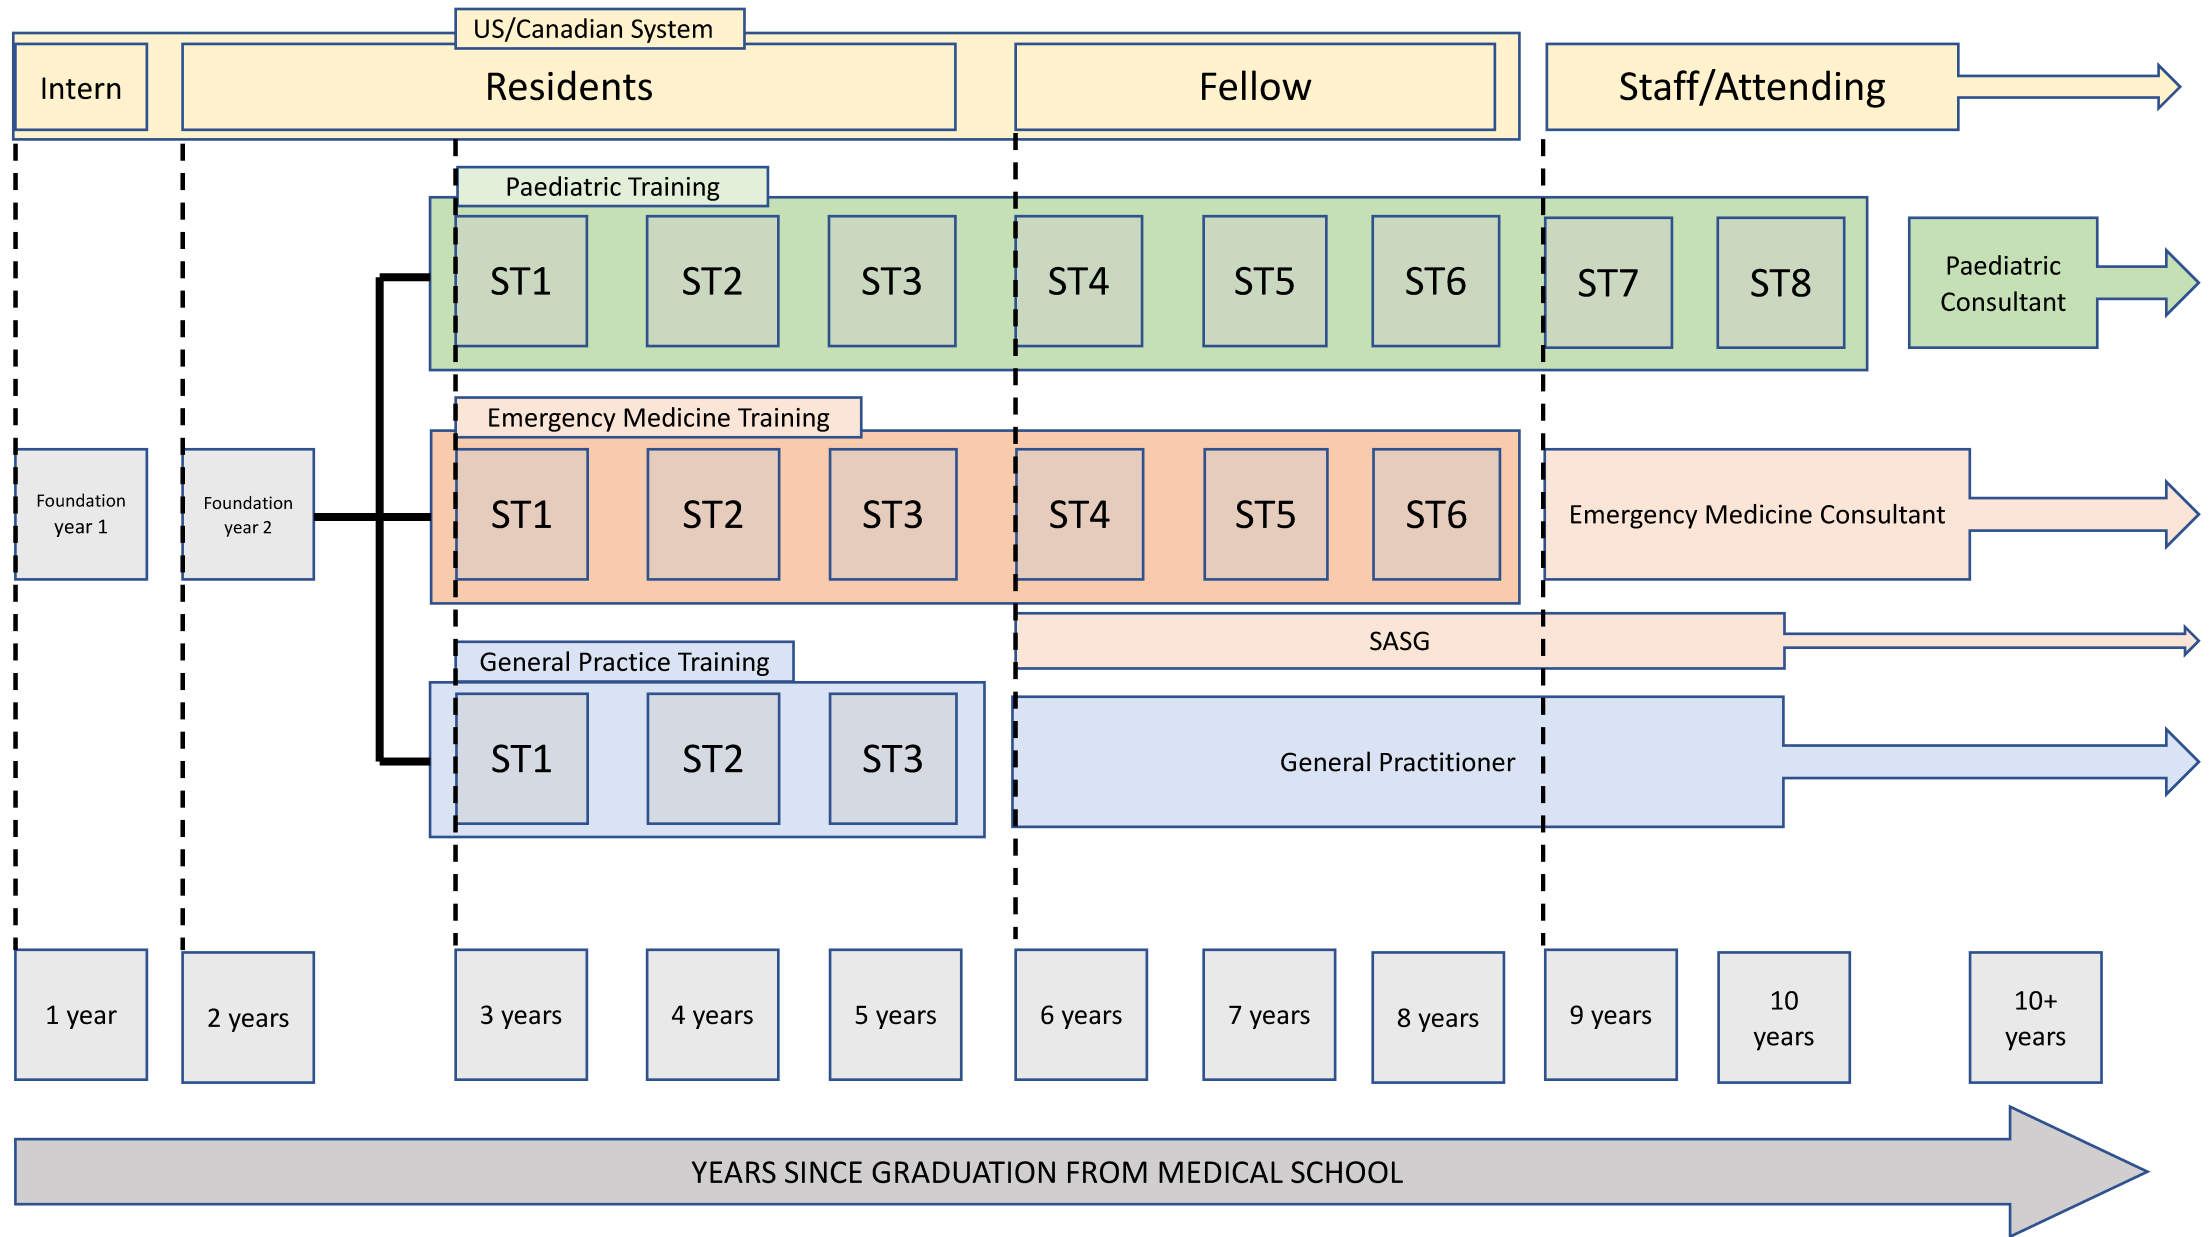

Supplement: bmjopen-2020-041485supp001_data_supplement.pdf [file bmjopen-2020-041485supp001_data_supplement.pdf]
